# Supplementary material for: Growth Performance and Root Transcriptome Remodeling of Arabidopsis in Response to Mars-Like Levels of Magnesium Sulfate
Source: PubMed Central journal article supplement (PMC2925951; doi:10.1371/journal.pone.0012348), 2010-08-23

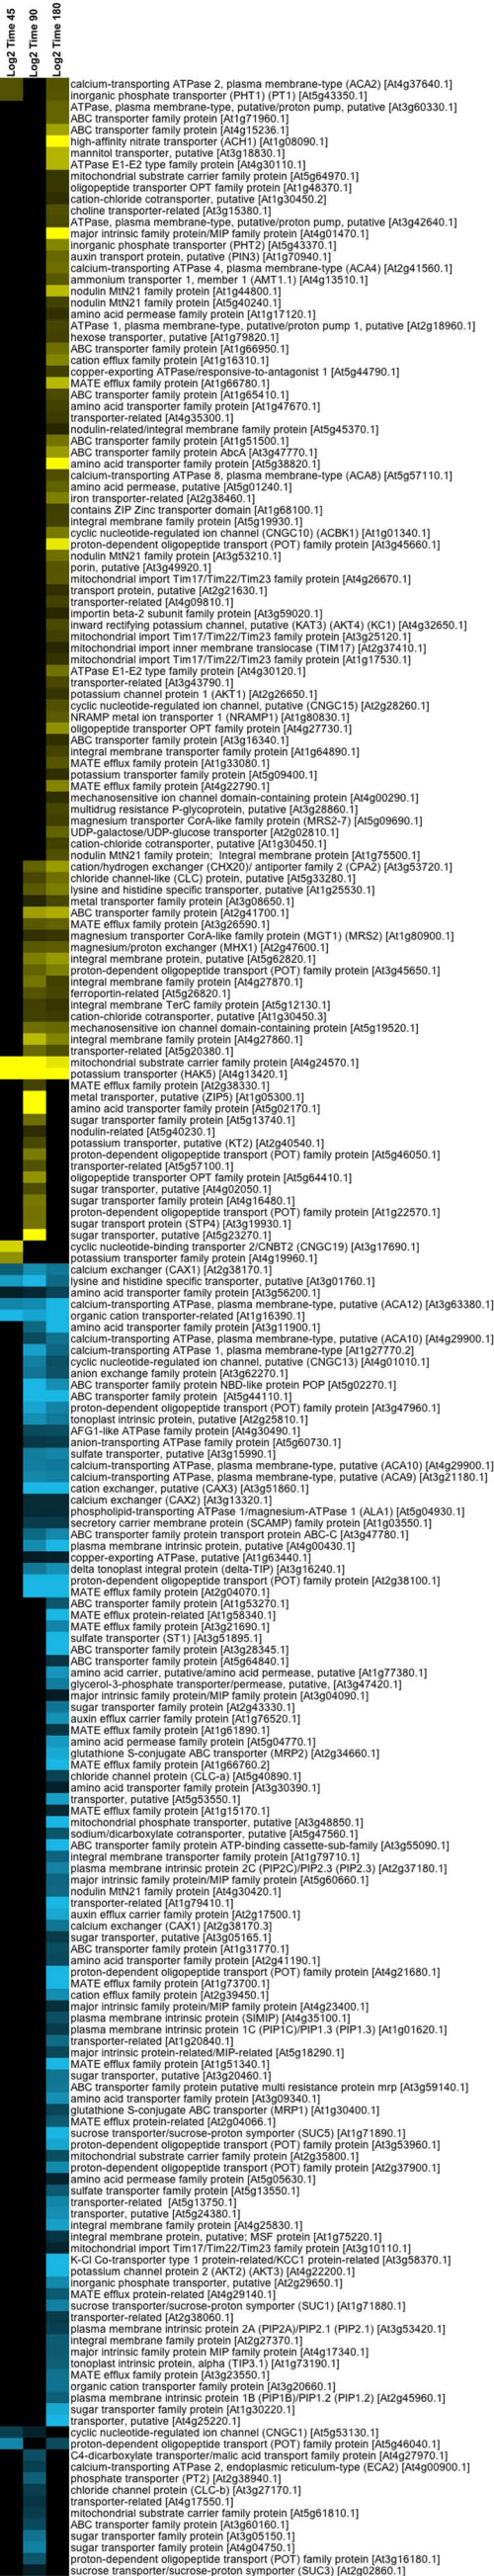

Supplement: pone.0012348.s003.pdf [file pone.0012348.s003.pdf]
