# Supplementary material for: Growth Performance and Root Transcriptome Remodeling of Arabidopsis in Response to Mars-Like Levels of Magnesium Sulfate
Source: PLoS One. 2010 Aug 23;5(8):e12348. doi: 10.1371/journal.pone.0012348 (PMC2925951; doi:10.1371/journal.pone.0012348)
Supplement: Table S1 — Plant growth performance ANOVA. ANOVA (t-test) results are shown for specific genotype concentration effects in the growth experiments. (0.01 MB XLS) [file pone.0012348.s001.xls]

## Sheet: Supplement 1
	Supplement 1. ANOVA (t-test) results for specific genotype*concentration effects in the growth experiments
	Conc.	Genotype	_Conc.	_Genotype	Diff. Estimate	StdErr	DF	tValue	P-value
	ws shoot FW biomass comparison on soil medium
	0	ws	20	ws	2.7275	0.3531	86	7.73	<.0001*
	0	ws	60	ws	5.145	0.3531	86	14.57	<.0001*
	0	ws	100	ws	7.1923	0.3531	86	20.37	<.0001*
	20	ws	60	ws	2.4175	0.3531	86	6.85	<.0001*
	20	ws	100	ws	4.4648	0.3531	86	12.65	<.0001*
	60	ws	100	ws	2.0473	0.3531	86	5.8	<.0001*
	col-0 shoot FW biomass comparison on soil medium
	0	col-0	20	col-0	3.4808	0.6337	86	5.49	<.0001*
	0	col-0	60	col-0	7.8975	0.6337	86	12.46	<.0001*
	0	col-0	80	col-0	8.302	0.4671	86	17.77	<.0001*
	0	col-0	100	col-0	10.038	0.6337	86	15.84	<.0001*
	20	col-0	60	col-0	4.4167	0.6337	86	6.97	<.0001*
	20	col-0	100	col-0	6.5572	0.6337	86	10.35	<.0001*
	60	col-0	80	col-0	3.0203	0.4671	86	6.47	<.0001*
	60	col-0	100	col-0	2.1405	0.6337	86	3.38	0.0011*
	80	col-0	100	col-0	0.2838	0.4671	86	0.61	0.545
	mrs2-10/col-0 shoot FW biomass comparison on soil medium
	0	col-0	0	mrs2-10	0.6458	0.6337	86	1.02	0.311
	20	col-0	20	mrs2-10	0.07167	0.6337	86	0.11	0.9102
	60	col-0	60	mrs2-10	-0.1983	0.6337	86	-0.31	0.755
	100	col-0	100	mrs2-10	0.07142	0.6337	86	0.11	0.9105
	mrs2-10/col-0 shoot chlorophyll comparison on soil medium
	0	col-0	0	mrs2-10	-0.4111	0.8282	560	-0.5	0.6198
	20	col-0	20	mrs2-10	-0.01528	0.8282	560	-0.02	0.9853
	60	col-0	60	mrs2-10	1.0528	0.8282	560	1.27	0.2042
	100	col-0	100	mrs2-10	0.7072	0.846	560	0.84	0.4035
	sel1-10/ws shoot FW biomass comparison on soil medium
	0	sel1-10	0	ws	-0.2667	0.3531	86	-0.76	0.4521
	20	sel1-10	20	ws	-0.1933	0.3531	86	-0.55	0.5854
	60	sel1-10	60	ws	-0.1225	0.3531	86	-0.35	0.7295
	100	sel1-10	100	ws	-0.04517	0.3531	86	-0.13	0.8985
	sel1-10/ws shoot chlorophyll comparison on soil medium
	0	sel1-10	0	ws	0.3208	0.685	532	0.47	0.6397
	20	sel1-10	20	ws	0.3931	0.685	532	0.57	0.5663
	60	sel1-10	60	ws	0.7944	0.685	532	1.16	0.2466
	100	sel1-10	100	ws	-0.8181	0.7837	532	-1.04	0.297
	cax1-1/col-0 shoot FW biomass comparison on soil medium
	0	cax1-1	0	col-0	-0.7908	0.4671	86	-1.69	0.0941
	60	cax1-1	60	col-0	0.4725	0.4671	86	1.01	0.3146
	80	cax1-1	80	col-0	0.9305	0.4671	86	1.99	0.0495*
	100	cax1-1	100	col-0	1.142	0.4671	86	2.44	0.0165*
	cax1-1/col-0 shoot chlorophyll comparison on soil medium
	0	cax1-1	0	col-0	-0.2847	1.0107	566	-0.28	0.7783
	60	cax1-1	60	col-0	1.8972	1.0107	566	1.88	0.061
	80	cax1-1	80	col-0	5.7931	1.0107	566	5.73	<.0001*
	100	cax1-1	100	col-0	7.6306	1.0107	566	7.55	<.0001*
	cax1/cax3/col-0 shoot FW biomass comparison on soil medium
	0	cax1-1	0	col-0	-6.5781	0.3312	64	-19.86	<.0001*
	80	cax1-1	80	col-0	0.3279	0.3312	64	0.99	0.3259
	100	cax1-1	100	col-0	0.3345	0.3312	64	1.01	0.3164
	cax1/cax3/col-0 shoot chlorophyll comparison on soil medium
	0	cax1-1	0	col-0	8.7083	0.8883	414	9.8	<.0001*
	80	cax1-1	80	col-0	6.2347	0.8883	414	7.02	<.0001*
	100	cax1-1	100	col-0	8.2771	0.9219	414	8.98	<.0001*
