# Supplementary material for: Growth Performance and Root Transcriptome Remodeling of Arabidopsis in Response to Mars-Like Levels of Magnesium Sulfate
Source: PLoS One. 2010 Aug 23;5(8):e12348. doi: 10.1371/journal.pone.0012348 (PMC2925951; doi:10.1371/journal.pone.0012348)
Supplement: Table S2 — Root transcriptome ANOVA. An ANOVA analysis of differential expression in the root transcriptome. (0.71 MB XLS) [file pone.0012348.s002.xls]

## Sheet: significant genes Time 45
GENE	Effect	TREATMENT	_TREATMENT	Log2(Fold Change treatment vs control)	StdErr	DF	tValue	Probt	q-value		GeneName	SystematicName	Description
A_84_P13790	TREATMENT	45 min col-0 treatment	45 min col-0 control	-1.2264	0.07152	15	-17.15	2.9e-11	6.70856e-07		At4g08950.1	At4g08950.1	phosphate-responsive protein, putative (EXO) similar to phi-1 (phosphate-induced gene) [Nicotiana tabacum] GI:3759184; contains Pfam profile PF04674: Phosphate-induced protein 1 conserved region [At4g08950.1]
A_84_P10996	TREATMENT	45 min col-0 treatment	45 min col-0 control	-2.0693	0.1225	15	-16.89	3.58e-11	6.70856e-07		At4g23070.1	At4g23070.1	rhomboid family protein contains PFAM domain PF01694, Rhomboid family [At4g23070.1]
A_84_P97916	TREATMENT	45 min col-0 treatment	45 min col-0 control	1.4961	0.09832	15	15.22	1.59e-10	1.98633e-06		At4g29780.1	At4g29780.1	expressed protein [At4g29780.1]
A_84_P13018	TREATMENT	45 min col-0 treatment	45 min col-0 control	1.5416	0.1049	15	14.69	2.6e-10	2.43607e-06		At5g13910.1	At5g13910.1	AP2/EREBP-like transcription factor LEAFY PETIOLE, putative nearly identical to AP2/EREBP-like transcription factor LEAFY PETIOLE [Arabidopsis thaliana] GI:6942018 [At5g13910.1]
A_84_P78199	TREATMENT	45 min col-0 treatment	45 min col-0 control	-1.3399	0.09912	15	-13.52	8.34e-10	6.25133e-06		At5g25240.1	At5g25240.1	expressed protein [At5g25240.1]
A_84_P305650	TREATMENT	45 min col-0 treatment	45 min col-0 control	0.7094	0.05455	15	13	1.43e-09	8.93226e-06		At2g30500.1	At2g30500.1	kinase interacting family protein similar to kinase interacting protein 1 (GI:13936326) [Petunia integrifolia] [At2g30500.1]
A_84_P529946	TREATMENT	45 min col-0 treatment	45 min col-0 control	-1.6379	0.1327	15	-12.35	2.93e-09	1.1993e-05		At4g37235.1	At4g37235.1	expressed protein [At4g37235.1]
A_84_P544251	TREATMENT	45 min col-0 treatment	45 min col-0 control	2.6714	0.2178	15	12.27	3.2e-09	1.1993e-05		At5g38700.1	At5g38700.1	expressed protein [At5g38700.1]
A_84_P16443	TREATMENT	45 min col-0 treatment	45 min col-0 control	-0.907	0.07277	15	-12.46	2.57e-09	1.1993e-05		At3g06770.1	At3g06770.1	glycoside hydrolase family 28 protein / polygalacturonase (pectinase) family protein weak similarity to polygalacturonase [Persea americana] GI:166951; contains PF00295: Glycosyl hydrolases family 28 (polygalacturonases) [At3g06770.1]
A_84_P512722	TREATMENT	45 min col-0 treatment	45 min col-0 control	0.7914	0.06301	15	12.56	2.31e-09	1.1993e-05		At2g25690.1	At2g25690.1	senescence-associated protein-related similar to senescence-associated protein SAG102 (GI:22331931) [Arabidopsis thaliana] [At2g25690.1]
A_84_P22087	TREATMENT	45 min col-0 treatment	45 min col-0 control	-1.2778	0.1063	15	-12.03	4.19e-09	1.42757e-05		At3g10190.1	At3g10190.1	calmodulin, putative similar to calmodulin NtCaM13 [Nicotiana tabacum] GI:14625425, calmodulin GB:AAA34015 [Glycine max]; contains INTERPRO:IPR002048 calcium-binding EF-hand domain [At3g10190.1]
A_84_P301260	TREATMENT	45 min col-0 treatment	45 min col-0 control	1.1068	0.09361	15	11.82	5.29e-09	1.65216e-05		At1g74450.1	At1g74450.1	expressed protein [At1g74450.1]
A_84_P598916	TREATMENT	45 min col-0 treatment	45 min col-0 control	1.673	0.1432	15	11.68	6.23e-09	1.79606e-05		At2g30300.1	At2g30300.1	nodulin-related weak similarity to nodule-specific protein Nlj70 [Lotus japonicus] GI:3329366 [At2g30300.1]
A_84_P23884	TREATMENT	45 min col-0 treatment	45 min col-0 control	-1.149	0.1038	15	-11.07	1.3e-08	3.4801e-05		At2g23130.1	At2g23130.1	arabinogalactan-protein (AGP17) identical to gi_11935086_gb_AAG41963 [At2g23130.1]
A_84_P503082	TREATMENT	45 min col-0 treatment	45 min col-0 control	1.1562	0.1106	15	10.45	2.79e-08	6.97091e-05		At3g10300.1	At3g10300.1	calcium-binding EF hand family protein low similarity to SP|P12815 Programmed cell death protein 6 (Probable calcium-binding protein ALG-2) {Mus musculus}; contains INTERPRO:IPR002048 calcium-binding EF-hand domain [At3g10300.1]
A_84_P281390	TREATMENT	45 min col-0 treatment	45 min col-0 control	-1.1368	0.1118	15	-10.17	4.02e-08	9.41635e-05		At4g01140.1	At4g01140.1	expressed protein [At4g01140.1]
A_84_P526889	TREATMENT	45 min col-0 treatment	45 min col-0 control	-0.9759	0.1028	15	-9.5	9.83e-08	0.000216711		At2g17300.1	At2g17300.1	expressed protein [At2g17300.1]
A_84_P18072	TREATMENT	45 min col-0 treatment	45 min col-0 control	1.3473	0.1455	15	9.26	1.36e-07	0.000283167		At1g72520.1	At1g72520.1	lipoxygenase, putative similar to lipoxygenase gi:1495804 [Solanum tuberosum], gi:1654140 [Lycopersicon esculentum], GB:CAB56692 [Arabidopsis thaliana] [At1g72520.1]
A_84_P66214	TREATMENT	45 min col-0 treatment	45 min col-0 control	2.0824	0.2266	15	9.19	1.5e-07	0.000295879		At3g02840.1	At3g02840.1	immediate-early fungal elicitor family protein similar to immediate-early fungal elicitor protein CMPG1 (GI:14582200) [Petroselinum crispum] [At3g02840.1]
A_84_P568326	TREATMENT	45 min col-0 treatment	45 min col-0 control	-0.7518	0.08222	15	-9.14	1.6e-07	0.000299824		At1g09812.1	At1g09812.1	expressed protein ; expression supported by MPSS [At1g09812.1]
A_84_P21986	TREATMENT	45 min col-0 treatment	45 min col-0 control	2.2018	0.243	15	9.06	1.8e-07	0.00032124		CHR2:009686022-009686081	CHR2:009686022-009686081	Unknown
A_84_P22847	TREATMENT	45 min col-0 treatment	45 min col-0 control	2.3327	0.2631	15	8.86	2.38e-07	0.000405444		At1g14550.1	At1g14550.1	anionic peroxidase, putative similar to anionic peroxidase GI:170202 from (Nicotiana sylvestris) [At1g14550.1]
A_84_P174101	TREATMENT	45 min col-0 treatment	45 min col-0 control	-1.0069	0.1141	15	-8.83	2.52e-07	0.000410629		At1g55330.1	At1g55330.1	arabinogalactan-protein (AGP21) [At1g55330.1]
A_84_P540904	TREATMENT	45 min col-0 treatment	45 min col-0 control	-0.5479	0.06236	15	-8.79	2.67e-07	0.000416943		At1g22882.1	At1g22882.1	expressed protein [At1g22882.1]
A_84_P582920	TREATMENT	45 min col-0 treatment	45 min col-0 control	-1.4143	0.1618	15	-8.74	2.85e-07	0.000427249		At2g45760.1	At2g45760.1	BON1-associated protein (BAP1)-related similar to BON1-associated protein 1 BAP1 [Arabidopsis thaliana] GI:15487384; contains Pfam profile PF00168: C2 domain [At2g45760.1]
A_84_P197554	TREATMENT	45 min col-0 treatment	45 min col-0 control	1.1365	0.1306	15	8.7	3e-07	0.000432439		At2g28650.1	At2g28650.1	exocyst subunit EXO70 family protein contains Pfam domain PF03081: Exo70 exocyst complex subunit [At2g28650.1]
A_84_P16226	TREATMENT	45 min col-0 treatment	45 min col-0 control	2.023	0.2337	15	8.66	3.22e-07	0.00044696		At1g14540.1	At1g14540.1	anionic peroxidase, putative similar to lignin forming anionic peroxidase [Nicotiana sylvestris] SWISS-PROT: Q02200 [At1g14540.1]
A_84_P201948	TREATMENT	45 min col-0 treatment	45 min col-0 control	-1.0837	0.1263	15	-8.58	3.58e-07	0.000465244		At4g35320.1	At4g35320.1	expressed protein predicted protein, Arabidopsis thaliana [At4g35320.1]
A_84_P706218	TREATMENT	45 min col-0 treatment	45 min col-0 control	-1.585	0.1847	15	-8.58	3.6e-07	0.000465244		CHR1:021477192-021477133	CHR1:021477192-021477133	Unknown
A_84_P22274	TREATMENT	45 min col-0 treatment	45 min col-0 control	-1.4471	0.1692	15	-8.55	3.75e-07	0.000468475		At3g63350.1	At3g63350.1	heat shock transcription factor family protein contains Pfam profile: PF00447 HSF-type DNA-binding domain [At3g63350.1]
A_84_P14556	TREATMENT	45 min col-0 treatment	45 min col-0 control	0.9195	0.1085	15	8.47	4.22e-07	0.000510184		At3g15540.1	At3g15540.1	auxin-responsive protein / indoleacetic acid-induced protein 19 (IAA19) identical to SP|O24409 Auxin-responsive protein IAA19 (Indoleacetic acid-induced protein 19) {Arabidopsis thaliana} [At3g15540.1]
A_84_P14286	TREATMENT	45 min col-0 treatment	45 min col-0 control	-1.0809	0.1283	15	-8.43	4.51e-07	0.000528206		At1g78260.1	At1g78260.1	RNA recognition motif (RRM)-containing protein similar to RNA recognition motif-containing protein SEB-4 GI:8895698 from [Xenopus laevis]; contains InterPro entry IPR000504: RNA-binding region RNP-1 (RNA recognition motif) (RRM) [At1g78260.1]
A_84_P141979	TREATMENT	45 min col-0 treatment	45 min col-0 control	-0.7772	0.09295	15	-8.36	4.98e-07	0.000565577		At5g65390.1	At5g65390.1	arabinogalactan-protein (AGP7) [At5g65390.1]
A_84_P521598	TREATMENT	45 min col-0 treatment	45 min col-0 control	1.9088	0.2378	15	8.03	8.24e-07	0.00090829		At2g22760.1	At2g22760.1	basic helix-loop-helix (bHLH) family protein contains Pfam profile: PF00010 helix-loop-helix DNA-binding domain [At2g22760.1]
A_84_P15192	TREATMENT	45 min col-0 treatment	45 min col-0 control	-0.7185	0.09071	15	-7.92	9.73e-07	0.00104189		At1g30690.1	At1g30690.1	SEC14 cytosolic factor family protein / phosphoglyceride transfer family protein contains Pfam PF00650 : CRAL/TRIO domain; contains Pfam PF03765 : CRAL/TRIO, N-terminus; similar to cytosolic factor (Phosphatidylinositol/phosphatidylcholine transfer...
A_84_P10647	TREATMENT	45 min col-0 treatment	45 min col-0 control	-1.2124	0.1539	15	-7.88	1.04e-06	0.0010827		At2g26480.1	At2g26480.1	UDP-glucoronosyl/UDP-glucosyl transferase family protein contains Pfam profile: PF00201 UDP-glucoronosyl and UDP-glucosyl transferase [At2g26480.1]
A_84_P15503	TREATMENT	45 min col-0 treatment	45 min col-0 control	1.4466	0.1847	15	7.83	1.12e-06	0.00113447		At3g22830.1	At3g22830.1	heat shock transcription factor family protein contains Pfam profile: PF00447 HSF-type DNA-binding domain [At3g22830.1]
A_84_P16108	TREATMENT	45 min col-0 treatment	45 min col-0 control	0.7653	0.09818	15	7.8	1.18e-06	0.00116379		At1g09940.1	At1g09940.1	glutamyl-tRNA reductase 2 / GluTR (HEMA2) identical to glutamyl-tRNA reductase 2, chloroplast [SP|P49294] [At1g09940.1]
A_84_P23584	TREATMENT	45 min col-0 treatment	45 min col-0 control	0.3345	0.04306	15	7.77	1.23e-06	0.001182		At5g16830.1	At5g16830.1	syntaxin 21 (SYP21) / PEP12 homolog identical to Syntaxin homolog (PEP12 homolog) (SP:Q39233) and syntaxin of plants 21 (GP:899122) {Arabidopsis thaliana}; contains Pfam profiles PF05739:SNARE domain and PF00804: Syntaxin [At5g16830.1]
A_84_P19215	TREATMENT	45 min col-0 treatment	45 min col-0 control	1.2961	0.1677	15	7.73	1.31e-06	0.0012274		At2g21510.1	At2g21510.1	DNAJ heat shock N-terminal domain-containing protein similar to SP|P39101 CAJ1 protein, Saccharomyces cerevisiae; contains Pfam profile PF00226 DnaJ domain [At2g21510.1]
A_84_P14717	TREATMENT	45 min col-0 treatment	45 min col-0 control	2.4955	0.3247	15	7.68	1.41e-06	0.00128496		At4g01630.1	At4g01630.1	expansin, putative (EXP17) similar to alpha-expansin precursor GI:4027891 from [Nicotiana tabacum]; alpha-expansin gene family, PMID:11641069 [At4g01630.1]
A_84_P561605	TREATMENT	45 min col-0 treatment	45 min col-0 control	-0.7413	0.09667	15	-7.67	1.44e-06	0.00128496		At3g15115.1	At3g15115.1	expressed protein [At3g15115.1]
A_84_P94909	TREATMENT	45 min col-0 treatment	45 min col-0 control	0.1656	0.0217	15	7.63	1.53e-06	0.00133352		At3g61350.1	At3g61350.1	SKP1 interacting partner 4 (SKIP4) almost idential to SKP1 interacting partner 4 GI:10716953 from [Arabidopsis thaliana], 42 aa extension at N-terminal; contains Pfam profiles PF01344: Kelch motif, PF00646: F-box domain [At3g61350.1]
A_84_P19960	TREATMENT	45 min col-0 treatment	45 min col-0 control	2.554	0.3366	15	7.59	1.64e-06	0.00139691		At1g78390.1	At1g78390.1	9-cis-epoxycarotenoid dioxygenase, putative / neoxanthin cleavage enzyme, putative / carotenoid cleavage dioxygenase, putative similar to 9-cis-epoxycarotenoid dioxygenase [Phaseolus vulgaris][GI:6715257]; similar to neoxanthin cleavage enzyme...
A_84_P17298	TREATMENT	45 min col-0 treatment	45 min col-0 control	-1.1456	0.1518	15	-7.55	1.75e-06	0.00145748		At2g45080.1	At2g45080.1	cyclin family protein similar to cyclin 2 [Trypanosoma brucei] GI:7339572, cyclin 6 [Trypanosoma cruzi] GI:12005317; contains Pfam profile PF00134: Cyclin, N-terminal domain [At2g45080.1]
A_84_P15501	TREATMENT	45 min col-0 treatment	45 min col-0 control	3.2099	0.4266	15	7.52	1.81e-06	0.00147468		At3g15370.1	At3g15370.1	expansin, putative (EXP12) similar to expansin GI:11191999 from [Lycopersicon esculentum]; alpha-expansin gene family, PMID:11641069 [At3g15370.1]
A_84_P17994	TREATMENT	45 min col-0 treatment	45 min col-0 control	-0.6859	0.09253	15	-7.41	2.18e-06	0.00160323		At1g23030.1	At1g23030.1	armadillo/beta-catenin repeat family protein / U-box domain-containing protein contains Pfam domain, PF00514: Armadillo/beta-catenin-like repeats and Pfam, PF04564: U-box domain [At1g23030.1]
A_84_P22573	TREATMENT	45 min col-0 treatment	45 min col-0 control	-0.3754	0.05088	15	-7.38	2.3e-06	0.00160323		At5g53130.1	At5g53130.1	cyclic nucleotide-regulated ion channel / cyclic nucleotide-gated channel (CNGC1) almost identical to cyclic nucleotide-regulated ion channel 1 pir:T51354, GI:11357236 from [Arabidopsis thaliana] [At5g53130.1]
A_84_P193364	TREATMENT	45 min col-0 treatment	45 min col-0 control	0.9509	0.1278	15	7.44	2.08e-06	0.00160323		At1g56660.1	At1g56660.1	expressed protein [At1g56660.1]
A_84_P131376	TREATMENT	45 min col-0 treatment	45 min col-0 control	-0.8365	0.1131	15	-7.4	2.22e-06	0.00160323		At5g19190.1	At5g19190.1	expressed protein predicted protein, Arabidopsis thaliana [At5g19190.1]
A_84_P193494	TREATMENT	45 min col-0 treatment	45 min col-0 control	-0.5122	0.06921	15	-7.4	2.22e-06	0.00160323		At3g52920.1	At3g52920.1	expressed protein weak similarity to enterophilin-2L [Cavia porcellus] GI:12718845; contains Pfam profile PF04949: Family of unknown function (DUF662) [At3g52920.1]
A_84_P18566	TREATMENT	45 min col-0 treatment	45 min col-0 control	1.1447	0.1541	15	7.43	2.12e-06	0.00160323		At4g24570.1	At4g24570.1	mitochondrial substrate carrier family protein contains Pfam profile: PF00153 mitochondrial carrier protein [At4g24570.1]
A_84_P516656	TREATMENT	45 min col-0 treatment	45 min col-0 control	0.6918	0.09381	15	7.37	2.31e-06	0.00160323		At4g35985.1	At4g35985.1	senescence/dehydration-associated protein-related similar to senescence-associated protein 12 [Hemerocallis hybrid cultivar] gi|3551958|gb|AAC34857; similar to early-responsive to dehydration stress ERD7 protein [Arabidopsis thaliana]...
A_84_P722438	TREATMENT	45 min col-0 treatment	45 min col-0 control	0.7154	0.09682	15	7.39	2.26e-06	0.00160323		CHR2:009693075-009693016	CHR2:009693075-009693016	Unknown
A_84_P13240	TREATMENT	45 min col-0 treatment	45 min col-0 control	-0.2795	0.03803	15	-7.35	2.4e-06	0.0016354		At1g47740.1	At1g47740.1	expressed protein [At1g47740.1]
A_84_P18192	TREATMENT	45 min col-0 treatment	45 min col-0 control	-1.0351	0.1417	15	-7.31	2.58e-06	0.00169637		At2g20750.1	At2g20750.1	beta-expansin, putative (EXPB1) identical to beta-expansin [Arabidopsis thaliana] gi|2224913|gb|AAB61709; similar to SP:O04701 major pollen allergen, Bermuda grass [Cynodon dactylon]; beta-expansin gene family, PMID:11641069 [At2g20750.1]
A_84_P209098	TREATMENT	45 min col-0 treatment	45 min col-0 control	-0.9914	0.1356	15	-7.31	2.56e-06	0.00169637		At4g00770.1	At4g00770.1	expressed protein [At4g00770.1]
A_84_P19314	TREATMENT	45 min col-0 treatment	45 min col-0 control	-0.4303	0.05898	15	-7.3	2.63e-06	0.00169943		At3g24720.1	At3g24720.1	protein kinase family protein protein kinase family; similar to tyrosine-protein kinase GB:P18160 from [Dictyostelium discoideum] [At3g24720.1]
A_84_P23844	TREATMENT	45 min col-0 treatment	45 min col-0 control	1.5295	0.2102	15	7.28	2.72e-06	0.0017278		At2g43870.1	At2g43870.1	polygalacturonase, putative / pectinase, putative similar to SP|P48979 Polygalacturonase precursor (EC 3.2.1.15) (PG) (Pectinase) {Prunus persica}; contains PF00295: Glycosyl hydrolases family 28 (polygalacturonases) [At2g43870.1]
A_84_P594418	TREATMENT	45 min col-0 treatment	45 min col-0 control	2.0836	0.2881	15	7.23	2.92e-06	0.00182393		At2g17660.1	At2g17660.1	nitrate-responsive NOI protein, putative similar to nitrate-induced NOI protein [Zea mays] GI:2642213 [At2g17660.1]
A_84_P535878	TREATMENT	45 min col-0 treatment	45 min col-0 control	1.4304	0.1995	15	7.17	3.23e-06	0.00196908		At3g03280.1	At3g03280.1	expressed protein [At3g03280.1]
A_84_P23485	TREATMENT	45 min col-0 treatment	45 min col-0 control	0.9384	0.1312	15	7.15	3.31e-06	0.00196908		At5g43890.1	At5g43890.1	flavin-containing monooxygenase family protein / FMO family protein similar to flavin-containing monooxygenases YUCCA [gi:16555352], YUCCA2 [gi:16555354], and YUCCA3 [gi:16555356] from Arabidopsis thaliana; contains Pfam profile PF00743 [At5g43890.1]
A_84_P22647	TREATMENT	45 min col-0 treatment	45 min col-0 control	-0.6627	0.09253	15	-7.16	3.27e-06	0.00196908		At5g08330.1	At5g08330.1	TCP family transcription factor, putative similar to PCF1 (GI:2580438) and PCF2 [(GI:2580440) Oryza sativa] ; auxin-induced basic helix-loop-helix transcription factor, Gossypium hirsutum, EMBL:AF165924 [At5g08330.1]
A_84_P531386	TREATMENT	45 min col-0 treatment	45 min col-0 control	0.8027	0.1129	15	7.11	3.57e-06	0.00208646		At2g34910.1	At2g34910.1	expressed protein [At2g34910.1]
A_84_P597689	TREATMENT	45 min col-0 treatment	45 min col-0 control	-1.0304	0.1454	15	-7.09	3.7e-06	0.00208646		At5g65340.1	At5g65340.1	expressed protein contains Pfam profile PF04759: Protein of unknown function, DUF617 [At5g65340.1]
A_84_P13596	TREATMENT	45 min col-0 treatment	45 min col-0 control	-1.1304	0.1593	15	-7.1	3.65e-06	0.00208646		At3g05860.1	At3g05860.1	MADS-box protein (AGL45) similar to MADS-box protein; PMID: 12837945; contains Pfam profile PF00319: SRF-type transcription factor (DNA-binding and dimerisation domain) [At3g05860.1]
A_84_P17349	TREATMENT	45 min col-0 treatment	45 min col-0 control	-0.2999	0.04235	15	-7.08	3.73e-06	0.00208646		At2g27350.1	At2g27350.1	OTU-like cysteine protease family protein contains Pfam profile PF02338: OTU-like cysteine protease [At2g27350.1]
A_84_P308743	TREATMENT	45 min col-0 treatment	45 min col-0 control	-0.6735	0.09582	15	-7.03	4.08e-06	0.00224868		At5g23280.1	At5g23280.1	TCP family transcription factor, putative similar to PCF2 [(GI:2580440) Oryza sativa] [At5g23280.1]
A_84_P174931	TREATMENT	45 min col-0 treatment	45 min col-0 control	-0.4784	0.06817	15	-7.02	4.16e-06	0.00225954		At5g22940.1	At5g22940.1	exostosin family protein contains Pfam profile: PF03016 exostosin family [At5g22940.1]
A_84_P736196	TREATMENT	45 min col-0 treatment	45 min col-0 control	0.7552	0.1092	15	6.92	4.9e-06	0.00256699		AV521081	AV521081	AV521081 Arabidopsis thaliana aboveground organs two to six-week old Arabidopsis thaliana cDNA clone APZ43b09F 3', mRNA sequence [AV521081]
A_84_P17099	TREATMENT	45 min col-0 treatment	45 min col-0 control	-0.412	0.05965	15	-6.91	5e-06	0.00256699		At1g32740.1	At1g32740.1	expressed protein [At1g32740.1]
A_84_P118232	TREATMENT	45 min col-0 treatment	45 min col-0 control	0.6952	0.1003	15	6.93	4.82e-06	0.00256699		At5g16360.1	At5g16360.1	NC domain-containing protein contains Pfam domain, PF04970: NC domain [At5g16360.1]
A_84_P18198	TREATMENT	45 min col-0 treatment	45 min col-0 control	1.0459	0.1513	15	6.91	4.95e-06	0.00256699		At2g16660.1	At2g16660.1	nodulin family protein similar to nodulin-like protein [Arabidopsis thaliana] GI:3329368, nodule-specific protein Nlj70 [Lotus japonicus] GI:3329366 [At2g16660.1]
A_84_P10124	TREATMENT	45 min col-0 treatment	45 min col-0 control	0.9748	0.1424	15	6.84	5.56e-06	0.00274674		At4g14560.1	At4g14560.1	auxin-responsive protein / indoleacetic acid-induced protein 1 (IAA1) identical to SP|P49677 Auxin-responsive protein IAA1 (Indoleacetic acid-induced protein 1) {Arabidopsis thaliana} [At4g14560.1]
A_84_P21312	TREATMENT	45 min col-0 treatment	45 min col-0 control	0.5724	0.08351	15	6.85	5.47e-06	0.00274674		At3g59440.1	At3g59440.1	calcium-binding protein, putative similar to calcium-binding protein [Lotus japonicus] GI:18413495 [At3g59440.1]
A_84_P535721	TREATMENT	45 min col-0 treatment	45 min col-0 control	-0.9929	0.1451	15	-6.84	5.57e-06	0.00274674		At1g76220.1	At1g76220.1	hypothetical protein contains Pfam profile PF03087: Arabidopsis protein of unknown function [At1g76220.1]
A_84_P17267	TREATMENT	45 min col-0 treatment	45 min col-0 control	-0.78	0.1142	15	-6.83	5.72e-06	0.00278408		At2g41410.1	At2g41410.1	calmodulin, putative identical to SP|P30188 Calmodulin-like protein {Arabidopsis thaliana} [At2g41410.1]
A_84_P23963	TREATMENT	45 min col-0 treatment	45 min col-0 control	0.9232	0.1368	15	6.75	6.52e-06	0.00313278		At2g30040.1	At2g30040.1	protein kinase family protein contains protein kinase domain, Pfam:PF00069 [At2g30040.1]
A_84_P13549	TREATMENT	45 min col-0 treatment	45 min col-0 control	0.3352	0.04986	15	6.72	6.82e-06	0.00322959		At2g39420.1	At2g39420.1	esterase/lipase/thioesterase family protein similar to monoglyceride lipase from [Homo sapiens] GI:14594904, [Mus musculus] GI:2632162; contains Interpro entry IPR000379 [At2g39420.1]
A_84_P539084	TREATMENT	45 min col-0 treatment	45 min col-0 control	2.556	0.3807	15	6.71	6.94e-06	0.00322959		At1g06135.1	At1g06135.1	expressed protein [At1g06135.1]
A_84_P193424	TREATMENT	45 min col-0 treatment	45 min col-0 control	0.8927	0.133	15	6.71	6.98e-06	0.00322959		At1g19180.1	At1g19180.1	expressed protein [At1g19180.1]
A_84_P19769	TREATMENT	45 min col-0 treatment	45 min col-0 control	-0.6348	0.09472	15	-6.7	7.08e-06	0.0032359		At5g61570.1	At5g61570.1	protein kinase family protein contains protein kinase domain, Pfam:PF00069 [At5g61570.1]
A_84_P523896	TREATMENT	45 min col-0 treatment	45 min col-0 control	1.9782	0.2959	15	6.69	7.28e-06	0.00327486		At5g50335.1	At5g50335.1	expressed protein [At5g50335.1]
A_84_P18255	TREATMENT	45 min col-0 treatment	45 min col-0 control	1.461	0.2187	15	6.68	7.34e-06	0.00327486		At1g75360.1	At1g75360.1	hypothetical protein [At1g75360.1]
A_84_P13038	TREATMENT	45 min col-0 treatment	45 min col-0 control	-0.5536	0.08306	15	-6.66	7.55e-06	0.00332893		At5g24100.1	At5g24100.1	leucine-rich repeat transmembrane protein kinase, putative [At5g24100.1]
A_84_P16426	TREATMENT	45 min col-0 treatment	45 min col-0 control	0.8851	0.1329	15	6.66	7.64e-06	0.00332944		At3g01900.1	At3g01900.1	cytochrome P450 family protein similar to Cytochrome P450 94A1 (P450-dependent fatty acid omega-hydroxylase) (SP:O81117) {Vicia sativa}; contains Pfam profile: PF00067 cytochrome P450 [At3g01900.1]
A_84_P18985	TREATMENT	45 min col-0 treatment	45 min col-0 control	-0.6576	0.09928	15	-6.62	8.09e-06	0.0034404		At1g11740.1	At1g11740.1	ankyrin repeat family protein contains ankyrin repeats, Pfam domain PF00023 [At1g11740.1]
A_84_P274250	TREATMENT	45 min col-0 treatment	45 min col-0 control	-0.5944	0.0897	15	-6.63	8.06e-06	0.0034404		At1g55390.1	At1g55390.1	DC1 domain-containing protein similar to hypothetical protein GI:4204272 from [Arabidopsis thaliana] contains weak PHD zinc finger motifs contains weak PHD zinc finger motifs DC1 domain, a divergent protein kinase C domain of unknown function....
A_84_P503480	TREATMENT	45 min col-0 treatment	45 min col-0 control	1.2543	0.1895	15	6.62	8.17e-06	0.0034404		At5g45630.1	At5g45630.1	expressed protein contains Pfam profile PF04520: Protein of unknown function, DUF584 [At5g45630.1]
A_84_P15231	TREATMENT	45 min col-0 treatment	45 min col-0 control	1.6424	0.2484	15	6.61	8.28e-06	0.00344798		At1g78230.1	At1g78230.1	leucine-rich repeat family protein [At1g78230.1]
A_84_P21872	TREATMENT	45 min col-0 treatment	45 min col-0 control	-0.5834	0.0887	15	-6.58	8.76e-06	0.00360777		At1g76890.1	At1g76890.1	trihelix DNA-binding protein / GT-2 factor (GT2) identical to GT2 factor [Arabidopsis thaliana] GI:416490, GI:2664202 (DNA binding factor GT-2 from Arabidopsis) [At1g76890.1]
A_84_P517322	TREATMENT	45 min col-0 treatment	45 min col-0 control	0.8538	0.13	15	6.57	8.92e-06	0.00363374		At3g19200.1	At3g19200.1	hypothetical protein [At3g19200.1]
A_84_P17161	TREATMENT	45 min col-0 treatment	45 min col-0 control	-0.963	0.1472	15	-6.54	9.31e-06	0.00375183		At1g52750.1	At1g52750.1	hydrolase, alpha/beta fold family protein contains Pfam profile PF00561: hydrolase, alpha/beta fold family [At1g52750.1]
A_84_P613104	TREATMENT	45 min col-0 treatment	45 min col-0 control	-0.7107	0.1092	15	-6.51	9.83e-06	0.00385711		At2g23130.2	At2g23130.2	arabinogalactan-protein (AGP17) identical to gi_11935086_gb_AAG41963 [At2g23130.2]
A_84_P305850	TREATMENT	45 min col-0 treatment	45 min col-0 control	1.7374	0.2667	15	6.51	9.79e-06	0.00385711		At2g02010.1	At2g02010.1	glutamate decarboxylase, putative strong similarity to glutamate decarboxylase isozyme 3 [Nicotiana tabacum] GI:13752462 [At2g02010.1]
A_84_P17163	TREATMENT	45 min col-0 treatment	45 min col-0 control	0.353	0.05423	15	6.51	9.88e-06	0.00385711		At1g73160.1	At1g73160.1	glycosyl transferase family 1 protein contains Pfam profile: PF00534 Glycosyl transferases group 1 [At1g73160.1]
A_84_P15139	TREATMENT	45 min col-0 treatment	45 min col-0 control	-0.501	0.07719	15	-6.49	1.02e-05	0.00390077		At1g03870.1	At1g03870.1	fasciclin-like arabinogalactan-protein (FLA9) identical to gi_13377784_gb_AAK20861 [At1g03870.1]
A_84_P16799	TREATMENT	45 min col-0 treatment	45 min col-0 control	0.7815	0.1204	15	6.49	1.02e-05	0.00390077		At1g18300.1	At1g18300.1	MutT/nudix family protein similar to SP|Q09790 Diadenosine 5',5'''-P1,P6-hexaphosphate hydrolase (EC 3.6.1.-) (Ap6A hydrolase) {Schizosaccharomyces pombe}; contains Pfam profile PF00293: NUDIX domain [At1g18300.1]
A_84_P194234	TREATMENT	45 min col-0 treatment	45 min col-0 control	-0.6056	0.0935	15	-6.48	1.04e-05	0.00393708		At1g33800.1	At1g33800.1	expressed protein contains Pfam profile PF04669: Protein of unknown function (DUF579) [At1g33800.1]
A_84_P21917	TREATMENT	45 min col-0 treatment	45 min col-0 control	-0.625	0.09687	15	-6.45	1.09e-05	0.0040851		At1g22335.1	At1g22335.1	expressed protein ; expression supported by MPSS [At1g22335.1]
A_84_P51200	TREATMENT	45 min col-0 treatment	45 min col-0 control	0.2279	0.03551	15	6.42	1.16e-05	0.0043044		At2g20010.1	At2g20010.1	expressed protein [At2g20010.1]
A_84_P156995	TREATMENT	45 min col-0 treatment	45 min col-0 control	0.9968	0.1557	15	6.4	1.19e-05	0.00437243		At1g57560.1	At1g57560.1	myb family transcription factor (MYB50) similar to DNA-binding protein GI:19058 from [Hordeum vulgare] [At1g57560.1]
A_84_P11330	TREATMENT	45 min col-0 treatment	45 min col-0 control	-0.5901	0.09267	15	-6.37	1.26e-05	0.00458469		At1g11545.1	At1g11545.1	xyloglucan:xyloglucosyl transferase, putative / xyloglucan endotransglycosylase, putative / endo-xyloglucan transferase, putative similar to endo-xyloglucan transferase GI:2244732 from [Gossypium hirsutum] [At1g11545.1]
A_84_P14870	TREATMENT	45 min col-0 treatment	45 min col-0 control	0.793	0.1253	15	6.33	1.35e-05	0.0048186		At5g02260.1	At5g02260.1	expansin, putative (EXP9) similar to expansin precursor GI:4138914 from [Lycopersicon esculentum]; alpha-expansin gene family, PMID:11641069 [At5g02260.1]
A_84_P21380	TREATMENT	45 min col-0 treatment	45 min col-0 control	-0.6147	0.09707	15	-6.33	1.34e-05	0.0048186		At4g18760.1	At4g18760.1	leucine-rich repeat family protein contains leucine rich-repeat domains Pfam:PF00560, INTERPRO:IPR001611 [At4g18760.1]
A_84_P23570	TREATMENT	45 min col-0 treatment	45 min col-0 control	1.8605	0.2948	15	6.31	1.4e-05	0.00490366		At5g65800.1	At5g65800.1	1-aminocyclopropane-1-carboxylate synthase, putative / ACC synthase, putative similar to ACC synthases from Arabidopsis thaliana [GI:940370], Lycopersicon esculentum [GI:508609], Cucumis sativus [GI:3641649] [At5g65800.1]
A_84_P14064	TREATMENT	45 min col-0 treatment	45 min col-0 control	-0.9053	0.1435	15	-6.31	1.4e-05	0.00490366		At5g54030.1	At5g54030.1	DC1 domain-containing protein contains Pfam profile PF03107: DC1 domain [At5g54030.1]
A_84_P511702	TREATMENT	45 min col-0 treatment	45 min col-0 control	-0.7493	0.1192	15	-6.29	1.46e-05	0.00506647		At1g53625.1	At1g53625.1	expressed protein [At1g53625.1]
A_84_P17588	TREATMENT	45 min col-0 treatment	45 min col-0 control	-0.3949	0.06289	15	-6.28	1.48e-05	0.00508876		At4g12730.1	At4g12730.1	fasciclin-like arabinogalactan-protein (FLA2) identical to gi_13377778_gb_AAK20858 [At4g12730.1]
A_84_P202258	TREATMENT	45 min col-0 treatment	45 min col-0 control	-0.3372	0.05379	15	-6.27	1.5e-05	0.00511064		At3g07470.1	At3g07470.1	expressed protein contains Pfam profile PF04398: Protein of unknown function, DUF538 [At3g07470.1]
A_84_P502958	TREATMENT	45 min col-0 treatment	45 min col-0 control	0.6989	0.1119	15	6.25	1.56e-05	0.00526718		At2g21500.2	At2g21500.2	expressed protein [At2g21500.2]
A_84_P13987	TREATMENT	45 min col-0 treatment	45 min col-0 control	1.6878	0.2707	15	6.23	1.6e-05	0.005354		At5g25190.1	At5g25190.1	ethylene-responsive element-binding protein, putative ethylene responsive element binding protein homolog, Stylosanthes hamata, EMBL:U91857 [At5g25190.1]
A_84_P257040	TREATMENT	45 min col-0 treatment	45 min col-0 control	-1.7618	0.2836	15	-6.21	1.66e-05	0.00550562		At4g16860.1	At4g16860.1	disease resistance protein (TIR-NBS-LRR class), putative domain signature TIR-NBS-LRR exists, suggestive of a disease resistance protein. [At4g16860.1]
A_84_P219918	TREATMENT	45 min col-0 treatment	45 min col-0 control	0.3618	0.0583	15	6.21	1.68e-05	0.00550764		At1g01830.1	At1g01830.1	armadillo/beta-catenin repeat family protein armadillo/beta-catenin-like repeats, Pfam:PF00514 [At1g01830.1]
A_84_P269770	TREATMENT	45 min col-0 treatment	45 min col-0 control	-1.3347	0.2152	15	-6.2	1.69e-05	0.00550764		At2g17590.1	At2g17590.1	DC1 domain-containing protein contains Pfam profile PF03107: DC1 domain [At2g17590.1]
A_84_P20368	TREATMENT	45 min col-0 treatment	45 min col-0 control	0.9979	0.161	15	6.2	1.71e-05	0.00552477		At3g59850.1	At3g59850.1	polygalacturonase, putative / pectinase, putative similar to SP|P48979 Polygalacturonase precursor (EC 3.2.1.15) (PG) (Pectinase) {Prunus persica}; contains PF00295: Glycosyl hydrolases family 28 (polygalacturonases) [At3g59850.1]
A_84_P13233	TREATMENT	45 min col-0 treatment	45 min col-0 control	0.3306	0.05344	15	6.19	1.74e-05	0.00557365		At1g02270.1	At1g02270.1	endonuclease/exonuclease/phosphatase family protein / calcium-binding EF hand family protein contains Pfam profiles: PF03372 endonuclease/exonuclease/phosphatase family, PF00036 EF hand [At1g02270.1]
A_84_P23019	TREATMENT	45 min col-0 treatment	45 min col-0 control	0.5934	0.09664	15	6.14	1.89e-05	0.00600283		At2g24400.1	At2g24400.1	auxin-responsive protein, putative / small auxin up RNA (SAUR_D) similar to SAUR-AC-like protein (small auxin up RNA) (GI:4455308) from [Arabidopsis thaliana]; auxin-induced protein TGSAUR22 (GI:10185820) [Tulipa gesnerian] [At2g24400.1]
A_84_P16621	TREATMENT	45 min col-0 treatment	45 min col-0 control	0.6477	0.1061	15	6.11	2.01e-05	0.00621586		At4g05170.1	At4g05170.1	basic helix-loop-helix (bHLH) family protein contains Pfam profile: PF00010 helix-loop-helix DNA-binding domain [At4g05170.1]
A_84_P266190	TREATMENT	45 min col-0 treatment	45 min col-0 control	-0.5979	0.09792	15	-6.11	2.01e-05	0.00621586		At1g26210.1	At1g26210.1	expressed protein similar to hypothetical protein GI:6524175 from [Arabidopsis thaliana] [At1g26210.1]
A_84_P11881	TREATMENT	45 min col-0 treatment	45 min col-0 control	0.6479	0.1062	15	6.1	2.03e-05	0.00621586		At4g01410.1	At4g01410.1	harpin-induced family protein / HIN1 family protein / harpin-responsive family protein similar to harpin-induced protein hin1 ( GI:1619321) [Nicotiana tabacum] [At4g01410.1]
A_84_P170753	TREATMENT	45 min col-0 treatment	45 min col-0 control	-0.9059	0.1486	15	-6.1	2.04e-05	0.00621586		At5g02890.1	At5g02890.1	transferase family protein contains Pfam profile PF02458: Transferase family [At5g02890.1]
A_84_P17866	TREATMENT	45 min col-0 treatment	45 min col-0 control	-1.3272	0.2175	15	-6.1	2.02e-05	0.00621586		At1g01680.1	At1g01680.1	U-box domain-containing protein [At1g01680.1]
A_84_P272390	TREATMENT	45 min col-0 treatment	45 min col-0 control	-0.5662	0.09304	15	-6.09	2.08e-05	0.00623634		At2g45180.1	At2g45180.1	protease inhibitor/seed storage/lipid transfer protein (LTP) family protein similar to 14 kDa polypeptide [Catharanthus roseus] GI:407410; contains Pfam protease inhibitor/seed storage/LTP family domain PF00234 [At2g45180.1]
A_84_P19710	TREATMENT	45 min col-0 treatment	45 min col-0 control	-0.8072	0.1326	15	-6.09	2.07e-05	0.00623634		At5g46040.1	At5g46040.1	proton-dependent oligopeptide transport (POT) family protein contains Pfam profile: PF00854 POT family [At5g46040.1]
A_84_P21946	TREATMENT	45 min col-0 treatment	45 min col-0 control	0.7802	0.1283	15	6.08	2.1e-05	0.00624633		At1g73540.1	At1g73540.1	MutT/nudix family protein low similarity to SP|Q09790 Diadenosine 5',5'''-P1,P6-hexaphosphate hydrolase (EC 3.6.1.-) (Ap6A hydrolase) {Schizosaccharomyces pombe}; contains Pfam profile PF00293: NUDIX domain [At1g73540.1]
A_84_P298034	TREATMENT	45 min col-0 treatment	45 min col-0 control	-0.7432	0.123	15	-6.04	2.25e-05	0.0066398		At1g08500.1	At1g08500.1	plastocyanin-like domain-containing protein [At1g08500.1]
A_84_P16164	TREATMENT	45 min col-0 treatment	45 min col-0 control	-0.2526	0.04196	15	-6.02	2.34e-05	0.00685145		At1g77840.1	At1g77840.1	eukaryotic translation initiation factor 5, putative / eIF-5, putative similar to SP|P55876 Eukaryotic translation initiation factor 5 (eIF-5) {Zea mays}; contains Pfam profiles PF02020: eIF4-gamma/eIF5/eIF2-epsilon, PF01873: Domain found in IF2B/IF5...
A_84_P576008	TREATMENT	45 min col-0 treatment	45 min col-0 control	-0.3342	0.0556	15	-6.01	2.38e-05	0.00689019		At4g16400.1	At4g16400.1	expressed protein [At4g16400.1]
A_84_P14670	TREATMENT	45 min col-0 treatment	45 min col-0 control	0.6735	0.1121	15	6.01	2.39e-05	0.00689019		At3g54200.1	At3g54200.1	expressed protein hin1 protein, Nicotiana tabacum, PIR:T03265 [At3g54200.1]
A_84_P208088	TREATMENT	45 min col-0 treatment	45 min col-0 control	-0.4932	0.08218	15	-6	2.42e-05	0.00692342		At5g10430.1	At5g10430.1	arabinogalactan-protein (AGP4) identical to gi_3883126_gb_AAC77826 [At5g10430.1]
A_84_P10041	TREATMENT	45 min col-0 treatment	45 min col-0 control	-0.422	0.07041	15	-5.99	2.46e-05	0.00698454		At4g20840.1	At4g20840.1	FAD-binding domain-containing protein similar to SP|P30986 reticuline oxidase precursor (Berberine-bridge-forming enzyme) (BBE) (Tetrahydroprotoberberine synthase) [Eschscholzia californica]; contains PF01565 FAD binding domain [At4g20840.1]
A_84_P18113	TREATMENT	45 min col-0 treatment	45 min col-0 control	1.7716	0.2977	15	5.95	2.66e-05	0.0074956		At1g76640.1	At1g76640.1	calmodulin-related protein, putative similar to regulator of gene silencing calmodulin-related protein GI:12963415 from [Nicotiana tabacum] [At1g76640.1]
A_84_P16372	TREATMENT	45 min col-0 treatment	45 min col-0 control	-1.4562	0.2453	15	-5.94	2.74e-05	0.00766341		NP454743	NP454743	putative replication protein A1 [Arabidopsis thaliana] [NP454743]
A_84_P23219	TREATMENT	45 min col-0 treatment	45 min col-0 control	-0.3849	0.06495	15	-5.93	2.78e-05	0.00771769		At3g63120.1	At3g63120.1	cyclin family protein similar to cyclin 2 [Trypanosoma brucei] GI:7339572, cyclin 6 [Trypanosoma cruzi] GI:12005317; contains Pfam profile PF00134: Cyclin, N-terminal domain [At3g63120.1]
A_84_P248365	TREATMENT	45 min col-0 treatment	45 min col-0 control	-0.7516	0.1274	15	-5.9	2.91e-05	0.00801919		At4g37240.1	At4g37240.1	expressed protein [At4g37240.1]
A_84_P255810	TREATMENT	45 min col-0 treatment	45 min col-0 control	0.5188	0.08818	15	5.88	3.01e-05	0.00811574		At1g77390.1	At1g77390.1	cyclin, putative similar to mitotic cyclin a2-type [Glycine max] GI:857397; contains Pfam profiles PF00134: Cyclin, N-terminal domain, PF02984: Cyclin, C-terminal domain [At1g77390.1]
A_84_P229729	TREATMENT	45 min col-0 treatment	45 min col-0 control	-0.7117	0.121	15	-5.88	3e-05	0.00811574		At2g20142.1	At2g20142.1	expressed protein [At2g20142.1]
A_84_P21225	TREATMENT	45 min col-0 treatment	45 min col-0 control	0.3711	0.06301	15	5.89	2.97e-05	0.00811574		At3g24090.1	At3g24090.1	glucosamine--fructose-6-phosphate aminotransferase [isomerizing], putative / hexosephosphate aminotransferase, putative / glucosamine-6-phosphate synthase, putative / D-fructose-6-phosphate amidotransferase, putative / GLCN6P synthase, putative...
A_84_P13187	TREATMENT	45 min col-0 treatment	45 min col-0 control	-0.4784	0.08221	15	-5.82	3.38e-05	0.009		At5g20410.1	At5g20410.1	1,2-diacylglycerol 3-beta-galactosyltransferase, putative / monogalactosyldiacylglycerol synthase, putative / MGDG synthase, putative identical to monogalactosyldiacylglycerol synthase [gi:3367638] from Arabidopsis thaliana, similar to MGDG synthase...
A_84_P552996	TREATMENT	45 min col-0 treatment	45 min col-0 control	0.2331	0.04007	15	5.82	3.39e-05	0.009		At5g02010.1	At5g02010.1	expressed protein contains Pfam profile PF03759: Domain of unknown function (DUF315) [At5g02010.1]
A_84_P21150	TREATMENT	45 min col-0 treatment	45 min col-0 control	-0.946	0.1627	15	-5.81	3.41e-05	0.009		At3g01760.1	At3g01760.1	lysine and histidine specific transporter, putative similar to lysine and histidine specific transporter [Arabidopsis thaliana] GI:2576361; contains Pfam profile PF01490: Transmembrane amino acid transporter protein [At3g01760.1]
A_84_P22915	TREATMENT	45 min col-0 treatment	45 min col-0 control	-1.0632	0.1835	15	-5.79	3.54e-05	0.0092015		At2g46600.1	At2g46600.1	calcium-binding protein, putative similar to EF-hand Ca2+-binding protein CCD1 [Triticum aestivum] GI:9255753 [At2g46600.1]
A_84_P550411	TREATMENT	45 min col-0 treatment	45 min col-0 control	0.2967	0.05124	15	5.79	3.56e-05	0.0092015		At5g20190.1	At5g20190.1	expressed protein [At5g20190.1]
A_84_P551677	TREATMENT	45 min col-0 treatment	45 min col-0 control	3.1098	0.5368	15	5.79	3.54e-05	0.0092015		At2g02320.1	At2g02320.1	F-box family protein / SKP1 interacting partner 3-related contains similarity to SKP1 interacting partner 3 GI:10716951 from [Arabidopsis thaliana] [At2g02320.1]
A_84_P23571	TREATMENT	45 min col-0 treatment	45 min col-0 control	-0.7109	0.1229	15	-5.79	3.6e-05	0.00924115		At5g66080.1	At5g66080.1	protein phosphatase 2C family protein / PP2C family protein similar to Ser/Thr protein phosphatase 2C (PP2C6) (GI:15020818) [Arabidopsis thaliana]; similar to protein phosphatase 2C (GI:3608412) [Mesembryanthemum crystallinum]; contains Pfam PF00481 :...
A_84_P595805	TREATMENT	45 min col-0 treatment	45 min col-0 control	1.4289	0.2478	15	5.77	3.72e-05	0.00947079		At5g36925.1	At5g36925.1	expressed protein [At5g36925.1]
A_84_P19438	TREATMENT	45 min col-0 treatment	45 min col-0 control	0.4649	0.08065	15	5.76	3.74e-05	0.00947079		At3g44880.1	At3g44880.1	Rieske [2Fe-2S] domain-containing protein similar to lethal leaf-spot 1 from Zea mays [gi:1935909]; contains Pfam PF00355 Rieske [2Fe-2S] domain [At3g44880.1]
A_84_P15054	TREATMENT	45 min col-0 treatment	45 min col-0 control	1.4354	0.2504	15	5.73	3.96e-05	0.0099606		At5g65130.1	At5g65130.1	AP2 domain-containing transcription factor, putative similar to AP2 domain transcription factor [At5g65130.1]
A_84_P573393	TREATMENT	45 min col-0 treatment	45 min col-0 control	1.0097	0.1765	15	5.72	4.06e-05	0.010144		At4g27654.1	At4g27654.1	expressed protein [At4g27654.1]
A_84_P19730	TREATMENT	45 min col-0 treatment	45 min col-0 control	-0.2708	0.04753	15	-5.7	4.23e-05	0.0104988		At1g64330.1	At1g64330.1	myosin heavy chain-related similar to myosin heavy chain (GI:1850913) [Entamoeba histolytica]; similar to Intracellular protein transport protein USO1 (Swiss-Prot:P25386) [Saccharomyces cerevisiae] [At1g64330.1]
A_84_P12302	TREATMENT	45 min col-0 treatment	45 min col-0 control	-0.5109	0.09014	15	-5.67	4.47e-05	0.0110215		At1g62510.1	At1g62510.1	protease inhibitor/seed storage/lipid transfer protein (LTP) family protein contains Pfam protease inhibitor/seed storage/LTP family domain PF00234 [At1g62510.1]
A_84_P554249	TREATMENT	45 min col-0 treatment	45 min col-0 control	0.4789	0.08458	15	5.66	4.51e-05	0.0110474		At1g52905.1	At1g52905.1	expressed protein [At1g52905.1]
A_84_P517162	TREATMENT	45 min col-0 treatment	45 min col-0 control	1.1151	0.1972	15	5.66	4.57e-05	0.0111217		At2g20630.2	At2g20630.2	protein phosphatase 2C, putative / PP2C, putative [At2g20630.2]
A_84_P21390	TREATMENT	45 min col-0 treatment	45 min col-0 control	1.5594	0.276	15	5.65	4.62e-05	0.0111709		At4g21200.1	At4g21200.1	oxidoreductase, 2OG-Fe(II) oxygenase family protein similar to gibberellin 20-oxidase from A. thaliana [gi:1109699], Phaseolis vulgaris [gi:2262201]; contains Pfam domain PF03171, 2OG-Fe(II) oxygenase superfamily [At4g21200.1]
A_84_P76024	TREATMENT	45 min col-0 treatment	45 min col-0 control	0.2639	0.04698	15	5.62	4.9e-05	0.0117719		At1g17360.1	At1g17360.1	COP1-interacting protein-related similar to COP1-Interacting Protein 7 (CIP7) (GI:3327870) [Arabidopsis thaliana] [At1g17360.1]
A_84_P23981	TREATMENT	45 min col-0 treatment	45 min col-0 control	1.7794	0.3173	15	5.61	4.98e-05	0.0118879		At1g01140.1	At1g01140.1	CBL-interacting protein kinase 9 (CIPK9) identical to CBL-interacting protein kinase 9 [Arabidopsis thaliana] gi|13249117|gb|AAK16684; contains Pfam profiles PF00069: Protein kinase domain and PF03822: NAF domain; identical to cDNA CBL-interacting...
A_84_P582608	TREATMENT	45 min col-0 treatment	45 min col-0 control	-0.5428	0.09685	15	-5.6	5.02e-05	0.0119076		At1g13540.1	At1g13540.1	expressed protein [At1g13540.1]
A_84_P65864	TREATMENT	45 min col-0 treatment	45 min col-0 control	0.706	0.1263	15	5.59	5.16e-05	0.0120867		At1g18740.1	At1g18740.1	expressed protein [At1g18740.1]
A_84_P15205	TREATMENT	45 min col-0 treatment	45 min col-0 control	-1.5036	0.2689	15	-5.59	5.15e-05	0.0120867		At1g16390.1	At1g16390.1	organic cation transporter-related low similarity to Organic cation/carnitine transporter 2 (Solute carrier family 22, member 5) (High-affinity sodium-dependent carnitine cotransporter) from {Homo sapiens} SP|O76082, {Rattus norvegicus} SP|O70594;...
A_84_P22290	TREATMENT	45 min col-0 treatment	45 min col-0 control	-0.4144	0.07425	15	-5.58	5.25e-05	0.0122211		At4g03210.1	At4g03210.1	xyloglucan:xyloglucosyl transferase, putative / xyloglucan endotransglycosylase, putative / endo-xyloglucan transferase, putative contains similarity to xyloglucan endo-transglycosylase-like protein (XET-1) GI:5070246 from [Medicago truncatula]...
A_84_P583074	TREATMENT	45 min col-0 treatment	45 min col-0 control	1.4217	0.255	15	5.57	5.31e-05	0.0122845		At3g55720.1	At3g55720.1	expressed protein contains Pfam profile PF04788: Protein of unknown function (DUF620) [At3g55720.1]
A_84_P11522	TREATMENT	45 min col-0 treatment	45 min col-0 control	-0.9255	0.1662	15	-5.57	5.35e-05	0.0123011		At1g55440.1	At1g55440.1	DC1 domain-containing protein contains Pfam profile PF03107: DC1 domain [At1g55440.1]
A_84_P255590	TREATMENT	45 min col-0 treatment	45 min col-0 control	-0.8318	0.1495	15	-5.56	5.42e-05	0.012386		At4g23870.1	At4g23870.1	expressed protein predicted proteins, Arabidopsis thaliana [At4g23870.1]
A_84_P13982	TREATMENT	45 min col-0 treatment	45 min col-0 control	-0.4107	0.07406	15	-5.55	5.61e-05	0.0126658		At5g23870.1	At5g23870.1	pectinacetylesterase family protein contains Pfam profile: PF03283 pectinacetylesterase [At5g23870.1]
A_84_P19878	TREATMENT	45 min col-0 treatment	45 min col-0 control	-0.5707	0.1029	15	-5.55	5.59e-05	0.0126658		At1g64640.1	At1g64640.1	plastocyanin-like domain-containing protein contains InterPro:IPR003245 plastocyanin-like domain [At1g64640.1]
A_84_P508082	TREATMENT	45 min col-0 treatment	45 min col-0 control	-0.7844	0.1416	15	-5.54	5.65e-05	0.0126797		At1g22110.1	At1g22110.1	expressed protein [At1g22110.1]
A_84_P21719	TREATMENT	45 min col-0 treatment	45 min col-0 control	-0.4885	0.08841	15	-5.53	5.82e-05	0.0127557		At5g38350.1	At5g38350.1	disease resistance protein (NBS-LRR class), putative domain signature NBS-LRR exists, suggestive of a disease resistance protein. [At5g38350.1]
A_84_P579612	TREATMENT	45 min col-0 treatment	45 min col-0 control	0.8255	0.1493	15	5.53	5.79e-05	0.0127557		At4g27652.1	At4g27652.1	expressed protein [At4g27652.1]
A_84_P266250	TREATMENT	45 min col-0 treatment	45 min col-0 control	-0.1837	0.03322	15	-5.53	5.78e-05	0.0127557		At5g01970.1	At5g01970.1	expressed protein [At5g01970.1]
A_84_P22716	TREATMENT	45 min col-0 treatment	45 min col-0 control	-0.4797	0.08682	15	-5.53	5.82e-05	0.0127557		At1g23050.1	At1g23050.1	hydroxyproline-rich glycoprotein family protein contains proline-rich extensin domains, INTERPRO:IPR002965 [At1g23050.1]
A_84_P15343	TREATMENT	45 min col-0 treatment	45 min col-0 control	0.7101	0.1287	15	5.52	5.93e-05	0.0128465		At2g14960.1	At2g14960.1	auxin-responsive GH3 family protein similar to auxin-responsive GH3 product [Glycine max] GI:18591; contains Pfam profile PF03321: GH3 auxin-responsive promoter [At2g14960.1]
A_84_P20769	TREATMENT	45 min col-0 treatment	45 min col-0 control	1.1697	0.2121	15	5.52	5.93e-05	0.0128465		At1g28160.1	At1g28160.1	ethylene-responsive element-binding family protein contains similarity to ethylene-responsive element binding factor GI:8809573 from (Nicotiana sylvestris) [At1g28160.1]
A_84_P538753	TREATMENT	45 min col-0 treatment	45 min col-0 control	-0.4649	0.08441	15	-5.51	6.01e-05	0.012945		At4g16950.2	At4g16950.2	disease resistance protein (TIR-NBS-LRR class), putative domain signature TIR-NBS-LRR exists, suggestive of a disease resistance protein.; closest homolog in Col-0 to RPP5 of clutivar Landsberg erecta. [At4g16950.2]
A_84_P270170	TREATMENT	45 min col-0 treatment	45 min col-0 control	-0.9131	0.1659	15	-5.5	6.08e-05	0.0130209		At1g21100.1	At1g21100.1	O-methyltransferase, putative similar to GI:2781394 [At1g21100.1]
A_84_P291114	TREATMENT	45 min col-0 treatment	45 min col-0 control	-0.3226	0.05873	15	-5.49	6.19e-05	0.0131812		At1g12460.1	At1g12460.1	leucine-rich repeat transmembrane protein kinase, putative [At1g12460.1]
A_84_P10114	TREATMENT	45 min col-0 treatment	45 min col-0 control	-0.5869	0.107	15	-5.49	6.25e-05	0.0132338		At4g38400.1	At4g38400.1	expansin family protein (EXPL2) contains Pfam profile: PF01357 pollen allergen; expansin-like gene, PMID:11641069, www.bio.psu.edu/expansins [At4g38400.1]
A_84_P181974	TREATMENT	45 min col-0 treatment	45 min col-0 control	2.6151	0.4803	15	5.44	6.77e-05	0.0142543		At1g20310.1	At1g20310.1	expressed protein [At1g20310.1]
A_84_P295584	TREATMENT	45 min col-0 treatment	45 min col-0 control	-0.3509	0.06453	15	-5.44	6.86e-05	0.0143631		At4g00330.1	At4g00330.1	protein kinase family protein contains protein kinase domain, Pfam:PF00069 [At4g00330.1]
A_84_P735526	TREATMENT	45 min col-0 treatment	45 min col-0 control	-1.187	0.219	15	-5.42	7.08e-05	0.0147414		CHR1:024345329-024345270	CHR1:024345329-024345270	Unknown
A_84_P20143	TREATMENT	45 min col-0 treatment	45 min col-0 control	1.8946	0.3497	15	5.42	7.12e-05	0.0147427		At2g43890.1	At2g43890.1	polygalacturonase, putative / pectinase, putative similar to SP|P48979 Polygalacturonase precursor (EC 3.2.1.15) (PG) (Pectinase) {Prunus persica}; contains Pfam profile PF00295: Glycosyl hydrolases family 28 (polygalacturonases) [At2g43890.1]
A_84_P16283	TREATMENT	45 min col-0 treatment	45 min col-0 control	0.4221	0.07797	15	5.41	7.17e-05	0.0147647		At2g43290.1	At2g43290.1	calmodulin-like protein (MSS3) identical to calmodulin-like MSS3 from GI:9965747 [Arabidopsis thaliana] [At2g43290.1]
A_84_P173921	TREATMENT	45 min col-0 treatment	45 min col-0 control	-0.3662	0.0677	15	-5.41	7.26e-05	0.0148683		At2g47440.1	At2g47440.1	DNAJ heat shock N-terminal domain-containing protein contains Pfam profiles PF00226: DnaJ domain, PF00515: TPR Domain; similar to GP|2104534|AF001308 (T10M13.11) [At2g47440.1]
A_84_P191974	TREATMENT	45 min col-0 treatment	45 min col-0 control	1.5628	0.2894	15	5.4	7.37e-05	0.0150116		At5g03210.1	At5g03210.1	expressed protein [At5g03210.1]
A_84_P21915	TREATMENT	45 min col-0 treatment	45 min col-0 control	0.7098	0.1316	15	5.39	7.47e-05	0.015133		At1g20190.1	At1g20190.1	expansin, putative (EXP11) similar to GB:U30460 from [Cucumis sativus]; alpha-expansin gene family, PMID:11641069 [At1g20190.1]
A_84_P15868	TREATMENT	45 min col-0 treatment	45 min col-0 control	0.9502	0.1765	15	5.38	7.6e-05	0.0152317		At5g22380.1	At5g22380.1	no apical meristem (NAM) family protein contains Pfam PF02365: No apical meristem (NAM) domain; [At5g22380.1]
A_84_P12863	TREATMENT	45 min col-0 treatment	45 min col-0 control	1.5548	0.2887	15	5.39	7.56e-05	0.0152317		At4g13420.1	At4g13420.1	potassium transporter (HAK5) identical to K+ transporter HAK5 [Arabidopsis thaliana] gi|7108597|gb|AAF36490; similar to high-affinity potassium transporter AtKUP1p [Arabidopsis thaliana] gi|2688979|gb|AAB88901; KUP/HAK/KT Transporter family member,...
A_84_P555382	TREATMENT	45 min col-0 treatment	45 min col-0 control	1.138	0.2117	15	5.37	7.73e-05	0.0154098		At3g09950.1	At3g09950.1	hypothetical protein ; expression supported by MPSS [At3g09950.1]
A_84_P516032	TREATMENT	45 min col-0 treatment	45 min col-0 control	-0.5883	0.1095	15	-5.37	7.78e-05	0.0154275		At1g06930.1	At1g06930.1	expressed protein ; expression supported by MPSS [At1g06930.1]
A_84_P21594	TREATMENT	45 min col-0 treatment	45 min col-0 control	-0.5721	0.1068	15	-5.36	8e-05	0.0157802		At5g44130.1	At5g44130.1	fasciclin-like arabinogalactan-protein, putative similar to gi_13377784_gb_AAK20861 [At5g44130.1]
A_84_P16570	TREATMENT	45 min col-0 treatment	45 min col-0 control	-0.4695	0.08865	15	-5.3	8.96e-05	0.0175813		At3g56230.1	At3g56230.1	speckle-type POZ protein-related contains Pfam PF00651 : BTB/POZ domain; similar to Speckle-type POZ protein (SP:O43791) [Homo sapiens] [At3g56230.1]
A_84_P598642	TREATMENT	45 min col-0 treatment	45 min col-0 control	1.0863	0.2056	15	5.28	9.18e-05	0.0179192		At1g07135.1	At1g07135.1	glycine-rich protein [At1g07135.1]
A_84_P21745	TREATMENT	45 min col-0 treatment	45 min col-0 control	0.6555	0.1245	15	5.26	9.52e-05	0.0184866		At1g02400.1	At1g02400.1	gibberellin 2-oxidase, putative / GA2-oxidase, putative similar to GA2ox2 [GI:4678368]; similar to dioxygenase GI:1666096 from [Marah macrocarpus]; contains PF03171 2OG-Fe(II) oxygenase superfamily domain [At1g02400.1]
A_84_P100286	TREATMENT	45 min col-0 treatment	45 min col-0 control	-0.3898	0.07412	15	-5.26	9.63e-05	0.0184904		At3g08600.1	At3g08600.1	expressed protein [At3g08600.1]
A_84_P16925	TREATMENT	45 min col-0 treatment	45 min col-0 control	-0.3157	0.06005	15	-5.26	9.67e-05	0.0184904		At5g60280.1	At5g60280.1	lectin protein kinase family protein contains Pfam domains, PF00138: Legume lectins alpha domain, PF00139: Legume lectins beta domain, and PF00069: Protein kinase domain [At5g60280.1]
A_84_P728069	TREATMENT	45 min col-0 treatment	45 min col-0 control	0.2954	0.05616	15	5.26	9.59e-05	0.0184904		CHR5:000060660-000060719	CHR5:000060660-000060719	Unknown
A_84_P11816	TREATMENT	45 min col-0 treatment	45 min col-0 control	-0.6498	0.1239	15	-5.24	9.93e-05	0.0187958		At3g50120.1	At3g50120.1	expressed protein contains Pfam profile PF03140: Plant protein of unknown function; expression supported by MPSS [At3g50120.1]
A_84_P288654	TREATMENT	45 min col-0 treatment	45 min col-0 control	-0.6875	0.1311	15	-5.24	9.9e-05	0.0187958		At1g22530.1	At1g22530.1	SEC14 cytosolic factor family protein / phosphoglyceride transfer family protein contains Pfam PF00650 : CRAL/TRIO domain; contains Pfam PF03765 : CRAL/TRIO, N-terminus; similar to SEC14-like protein 2 (Alpha-tocopherol associated protein) (TAP)...
A_84_P267120	TREATMENT	45 min col-0 treatment	45 min col-0 control	0.7367	0.1406	15	5.24	0.0001	0.0188332		At1g74950.1	At1g74950.1	expressed protein [At1g74950.1]
A_84_P12859	TREATMENT	45 min col-0 treatment	45 min col-0 control	1.8732	0.3582	15	5.23	0.000102	0.0191101		At4g12410.1	At4g12410.1	auxin-responsive family protein similar to GP:546362 small auxin up RNA {Arabidopsis thaliana}; auxin-induced protein 10A -Glycine max,PID:g255579 [At4g12410.1]
A_84_P554622	TREATMENT	45 min col-0 treatment	45 min col-0 control	1.5635	0.2993	15	5.22	0.000103	0.0191101		At3g56670.1	At3g56670.1	hypothetical protein hypothetical proteins - Arabidopsis thaliana [At3g56670.1]
A_84_P10765	TREATMENT	45 min col-0 treatment	45 min col-0 control	-0.3367	0.06443	15	-5.23	0.000103	0.0191101		At3g09780.1	At3g09780.1	protein kinase family protein contains eukaryotic protein kinase domain, INTERPRO:IPR000719 [At3g09780.1]
A_84_P23220	TREATMENT	45 min col-0 treatment	45 min col-0 control	-0.8122	0.1559	15	-5.21	0.000106	0.0195698		At3g63380.1	At3g63380.1	calcium-transporting ATPase, plasma membrane-type, putative / Ca(2+)-ATPase, putative (ACA12) identical to SP|Q9LY77 Potential calcium-transporting ATPase 12, plasma membrane-type (EC 3.6.3.8) (Ca(2+)-ATPase isoform 12) {Arabidopsis thaliana}; similar...
A_84_P549850	TREATMENT	45 min col-0 treatment	45 min col-0 control	1.081	0.208	15	5.2	0.000108	0.0198413		At1g60190.1	At1g60190.1	armadillo/beta-catenin repeat family protein / U-box domain-containing protein contains Pfam domain, PF00514: Armadillo/beta-catenin-like repeats and Pfam, PF04564: U-box domain [At1g60190.1]
A_84_P22932	TREATMENT	45 min col-0 treatment	45 min col-0 control	0.8692	0.1675	15	5.19	0.00011	0.0201102		At2g22770.1	At2g22770.1	basic helix-loop-helix (bHLH) family protein contains Pfam profile: PF00010 helix-loop-helix DNA-binding domain [At2g22770.1]
A_84_P21308	TREATMENT	45 min col-0 treatment	45 min col-0 control	-1.0115	0.1952	15	-5.18	0.000112	0.0203764		At1g21550.1	At1g21550.1	calcium-binding protein, putative contains similarity to calcium-binding protein GB:CAB63264 GI:6580549 from [Lotus japonicus] [At1g21550.1]
A_84_P16075	TREATMENT	45 min col-0 treatment	45 min col-0 control	-0.5767	0.1115	15	-5.17	0.000114	0.0206401		At1g64440.1	At1g64440.1	UDP-glucose 4-epimerase, putative / UDP-galactose 4-epimerase, putative / Galactowaldenase, putative similar to UDP-galactose 4-epimerase from Arabidopsis thaliana SP|Q42605, Cyamopsis tetragonoloba GI:3021357 [AJ005082] (Plant Sci. 142, 147-154...
A_84_P15378	TREATMENT	45 min col-0 treatment	45 min col-0 control	0.2393	0.04636	15	5.16	0.000116	0.0209012		At2g32410.1	At2g32410.1	auxin-resistance protein, putative strong similarity to SP|P42744 Auxin-resistance protein AXR1 {Arabidopsis thaliana}; contains Pfam profile PF00899: ThiF family [At2g32410.1]
A_84_P10724	TREATMENT	45 min col-0 treatment	45 min col-0 control	0.5531	0.1074	15	5.15	0.000118	0.0211598		At2g30020.1	At2g30020.1	protein phosphatase 2C, putative / PP2C, putative similar to protein phosphatase 2C (GI:4587992){Arabidopsis thaliana} [At2g30020.1]
A_84_P118452	TREATMENT	45 min col-0 treatment	45 min col-0 control	0.4078	0.07934	15	5.14	0.000121	0.0214921		At1g14530.1	At1g14530.1	tobamovirus multiplication protein 3, putative / TOM3, putative (THH1) identical to THH1 (GI:15706301) [Arabidopsis thaliana]; supporting cDNA gi|15706300|dbj|AB057678.1| [At1g14530.1]
A_84_P19389	TREATMENT	45 min col-0 treatment	45 min col-0 control	0.4869	0.09476	15	5.14	0.000121	0.0214921		At3g52450.1	At3g52450.1	U-box domain-containing protein similar to immediate-early fungal elicitor protein CMPG1 [Petroselinum crispum] GI:14582200; contains Pfam profile PF04564: U-box domain [At3g52450.1]
A_84_P568372	TREATMENT	45 min col-0 treatment	45 min col-0 control	-0.1795	0.03497	15	-5.13	0.000123	0.0217443		At1g22985.1	At1g22985.1	AP2 domain-containing transcription factor, putative [At1g22985.1]
A_84_P79759	TREATMENT	45 min col-0 treatment	45 min col-0 control	-0.6163	0.1206	15	-5.11	0.000128	0.022522		At5g62280.1	At5g62280.1	expressed protein [At5g62280.1]
A_84_P180254	TREATMENT	45 min col-0 treatment	45 min col-0 control	-0.5489	0.1076	15	-5.1	0.00013	0.022767		At4g12510.1	At4g12510.1	protease inhibitor/seed storage/lipid transfer protein (LTP) family protein similar to 14 kDa polypeptide [Catharanthus roseus] GI:407410; contains Pfam protease inhibitor/seed storage/LTP family domain PF00234 [At4g12510.1]
A_84_P595309	TREATMENT	45 min col-0 treatment	45 min col-0 control	0.6856	0.1346	15	5.09	0.000132	0.0230097		At2g18970.1	At2g18970.1	expressed protein [At2g18970.1]
A_84_P11223	TREATMENT	45 min col-0 treatment	45 min col-0 control	0.9245	0.1817	15	5.09	0.000134	0.0232502		At5g52020.1	At5g52020.1	AP2 domain-containing protein low similarity to DREB1B GI:3738226 from [Arabidopsis thaliana]; contains Pfam profile PF00847: AP2 domain [At5g52020.1]
A_84_P16571	TREATMENT	45 min col-0 treatment	45 min col-0 control	-0.9454	0.1867	15	-5.06	0.00014	0.0241793		At3g56400.1	At3g56400.1	WRKY family transcription factor DNA-binding protein 4 WRKY4 - Nicotiana tabacum, EMBL:AF193771 [At3g56400.1]
A_84_P22273	TREATMENT	45 min col-0 treatment	45 min col-0 control	-1.0737	0.2124	15	-5.05	0.000143	0.0244719		At1g05880.1	At1g05880.1	expressed protein [At1g05880.1]
A_84_P167393	TREATMENT	45 min col-0 treatment	45 min col-0 control	0.3612	0.07151	15	5.05	0.000143	0.0244719		At5g42630.1	At5g42630.1	myb family transcription factor (KAN4) contains Pfam profile: PF00249 myb-like DNA-binding domain; identical to cDNA GARP-like putative transcription factor KANADI4 (KAN4) GI:15723592 [At5g42630.1]
A_84_P15185	TREATMENT	45 min col-0 treatment	45 min col-0 control	1.1385	0.2261	15	5.03	0.000148	0.0249853		At1g22810.1	At1g22810.1	AP2 domain-containing transcription factor, putative Contains similarity to transcription factor (TINY) isolog T02O04.22 gb|2062174 from A. thaliana BAC gb|AC001645 [At1g22810.1]
A_84_P607390	TREATMENT	45 min col-0 treatment	45 min col-0 control	-0.6121	0.1215	15	-5.04	0.000147	0.0249853		At5g46470.1	At5g46470.1	disease resistance protein (TIR-NBS-LRR class), putative domain signature TIR-NBS-LRR exists, suggestive of a disease resistance protein. [At5g46470.1]
A_84_P596819	TREATMENT	45 min col-0 treatment	45 min col-0 control	0.8539	0.1696	15	5.03	0.000148	0.0249853		At1g04490.1	At1g04490.1	expressed protein [At1g04490.1]
A_84_P11238	TREATMENT	45 min col-0 treatment	45 min col-0 control	0.2445	0.04861	15	5.03	0.000149	0.0250414		At5g56630.1	At5g56630.1	phosphofructokinase family protein similar to phosphofructokinase [Amycolatopsis methanolica] GI:17432243; contains Pfam profile PF00365: Phosphofructokinase [At5g56630.1]
A_84_P11714	TREATMENT	45 min col-0 treatment	45 min col-0 control	-2.3484	0.468	15	-5.02	0.000153	0.0251497		At3g04210.1	At3g04210.1	disease resistance protein (TIR-NBS class), putative domain signature TIR-NBS exists, suggestive of a disease resistance protein. [At3g04210.1]
A_84_P141659	TREATMENT	45 min col-0 treatment	45 min col-0 control	1.4143	0.2817	15	5.02	0.000152	0.0251497		At4g01360.1	At4g01360.1	expressed protein [At4g01360.1]
A_84_P525609	TREATMENT	45 min col-0 treatment	45 min col-0 control	-0.6965	0.1388	15	-5.02	0.000153	0.0251497		At5g35870.1	At5g35870.1	hypothetical protein similar to unknown protein (gb|AAD25831.1) [At5g35870.1]
A_84_P519221	TREATMENT	45 min col-0 treatment	45 min col-0 control	1.8359	0.3653	15	5.03	0.000151	0.0251497		At4g14860.1	At4g14860.1	ovate family protein 58% similar to ovate protein (GI:23429649) [Lycopersicon esculentum]; contains TIGRFAM TIGR01568 : uncharacterized plant-specific domain TIGR01568 [At4g14860.1]
A_84_P587696	TREATMENT	45 min col-0 treatment	45 min col-0 control	-0.4856	0.09663	15	-5.03	0.000151	0.0251497		At5g03510.1	At5g03510.1	zinc finger (C2H2 type) family protein contains Pfam domain, PF00096: Zinc finger, C2H2 type [At5g03510.1]
A_84_P302000	TREATMENT	45 min col-0 treatment	45 min col-0 control	-0.7099	0.1419	15	-5	0.000158	0.0255238		At5g53250.1	At5g53250.1	arabinogalactan-protein, putative (AGP22) similar to arabinogalactan protein [Arabidopsis thaliana] gi|10880509|gb|AAG24284 [At5g53250.1]
A_84_P100216	TREATMENT	45 min col-0 treatment	45 min col-0 control	-0.4979	0.09952	15	-5	0.000158	0.0255238		At5g54240.1	At5g54240.1	expressed protein [At5g54240.1]
A_84_P257430	TREATMENT	45 min col-0 treatment	45 min col-0 control	-0.888	0.1774	15	-5.01	0.000157	0.0255238		At5g66800.1	At5g66800.1	expressed protein [At5g66800.1]
A_84_P149348	TREATMENT	45 min col-0 treatment	45 min col-0 control	0.4314	0.08618	15	5.01	0.000157	0.0255238		At2g34170.1	At2g34170.1	expressed protein contains Pfam profile: PF05097 protein of unknown function (DUF688) [At2g34170.1]
A_84_P20439	TREATMENT	45 min col-0 treatment	45 min col-0 control	0.6277	0.1257	15	4.99	0.00016	0.025736		At4g19960.1	At4g19960.1	potassium transporter family protein similar to potassium transporter [Arabidopsis thaliana] gi|2654088|gb|AAB87687; KUP/HAK/KT Transporter family member, PMID:11500563; contains Pfam profile PF02705: K+ potassium transporter [At4g19960.1]
A_84_P11645	TREATMENT	45 min col-0 treatment	45 min col-0 control	-0.5676	0.1137	15	-4.99	0.000161	0.0257862		At2g38170.1	At2g38170.1	calcium exchanger (CAX1) identical to high affinity calcium antiporter CAX1 [Arabidopsis thaliana] gi|9256741|gb|AAB05913, except a possible frameshift at base 58008. Sequence has been confirmed with 5 sequencing reads.; Ca2+:Cation Antiporter (CaCA)...
A_84_P12324	TREATMENT	45 min col-0 treatment	45 min col-0 control	1.6067	0.3222	15	4.99	0.000163	0.0259954		At1g70130.1	At1g70130.1	lectin protein kinase, putative similar to receptor lectin kinase 3 [Arabidopsis thaliana] gi|4100060|gb|AAD00733 [At1g70130.1]
A_84_P59660	TREATMENT	45 min col-0 treatment	45 min col-0 control	-0.4564	0.09164	15	-4.98	0.000165	0.0262028		At3g07460.1	At3g07460.1	expressed protein contains Pfam profile PF04398: Protein of unknown function, DUF538 [At3g07460.1]
A_84_P76794	TREATMENT	45 min col-0 treatment	45 min col-0 control	-0.2387	0.04809	15	-4.96	0.00017	0.0268148		At3g26680.1	At3g26680.1	DNA cross-link repair protein-related contains weak similarity to Swiss-Prot:P30620 DNA cross-LINK repair protein PSO2/SNM1 [Saccharomyces cerevisiae] [At3g26680.1]
A_84_P556908	TREATMENT	45 min col-0 treatment	45 min col-0 control	-0.313	0.06308	15	-4.96	0.000171	0.0268148		At1g51430.1	At1g51430.1	expressed protein [At1g51430.1]
A_84_P75684	TREATMENT	45 min col-0 treatment	45 min col-0 control	-0.444	0.08949	15	-4.96	0.000171	0.0268148		At4g17220.1	At4g17220.1	expressed protein [At4g17220.1]
A_84_P10936	TREATMENT	45 min col-0 treatment	45 min col-0 control	0.4241	0.08555	15	4.96	0.000172	0.0268592		At4g01540.1	At4g01540.1	no apical meristem (NAM) family protein similar to NAC1 (GI:7716952) {Medicago truncatula}; contains Pfam PF02365 : No apical meristem (NAM) protein [At4g01540.1]
A_84_P513083	TREATMENT	45 min col-0 treatment	45 min col-0 control	0.7387	0.1493	15	4.95	0.000175	0.0272143		At4g35200.1	At4g35200.1	hypothetical protein contains Pfam profile PF03087: Arabidopsis protein of unknown function [At4g35200.1]
A_84_P13428	TREATMENT	45 min col-0 treatment	45 min col-0 control	0.2279	0.04614	15	4.94	0.000178	0.0275665		At1g31860.1	At1g31860.1	histidine biosynthesis bifunctional protein (HISIE) identical to histidine biosynthesis bifunctional protein hisIE, chloroplast [precursor] SP: O82768 from [Arabidopsis thaliana]; identical to cDNA phosphoribosyl-ATP pyrophosphohydrolase GI:3461883...
A_84_P12030	TREATMENT	45 min col-0 treatment	45 min col-0 control	0.4351	0.08828	15	4.93	0.000182	0.0280699		At5g01100.1	At5g01100.1	expressed protein similar to axi 1 [Nicotiana tabacum] GI:559921; contains Pfam profile PF03138: Plant protein family [At5g01100.1]
A_84_P555320	TREATMENT	45 min col-0 treatment	45 min col-0 control	-1.2041	0.2447	15	-4.92	0.000184	0.0282621		At2g38830.1	At2g38830.1	tumor susceptibility protein-related contains weak similarity to Swiss-Prot:Q99816 tumor susceptibility gene 101 protein [Homo sapiens] [At2g38830.1]
A_84_P16642	TREATMENT	45 min col-0 treatment	45 min col-0 control	-0.5536	0.1129	15	-4.9	0.000191	0.0292175		At4g12720.1	At4g12720.1	MutT/nudix family protein similar to SP|P53370 Nucleoside diphosphate-linked moiety X motif 6 {Homo sapiens}; contains Pfam profile PF00293: NUDIX domain [At4g12720.1]
A_84_P562344	TREATMENT	45 min col-0 treatment	45 min col-0 control	0.3684	0.07525	15	4.9	0.000194	0.0295558		At2g20240.1	At2g20240.1	expressed protein [At2g20240.1]
A_84_P14259	TREATMENT	45 min col-0 treatment	45 min col-0 control	-0.4446	0.09091	15	-4.89	0.000196	0.0297396		At1g10740.1	At1g10740.1	expressed protein [At1g10740.1]
A_84_P565111	TREATMENT	45 min col-0 treatment	45 min col-0 control	-0.5577	0.1141	15	-4.89	0.000197	0.0297708		At3g05900.1	At3g05900.1	neurofilament protein-related similar to NF-180 (GI:632549) [Petromyzon marinus] similar to Neurofilament triplet H protein (200 kDa neurofilament protein) (Neurofilament heavy polypeptide) (NF-H) (Swiss-Prot:P12036) [Homo sapiens] [At3g05900.1]
A_84_P737318	TREATMENT	45 min col-0 treatment	45 min col-0 control	-2.0347	0.4164	15	-4.89	0.000198	0.0298018		AV802416	AV802416	AV802416 RAFL9 Arabidopsis thaliana cDNA clone RAFL09-31-N12 3', mRNA sequence [AV802416]
A_84_P19873	TREATMENT	45 min col-0 treatment	45 min col-0 control	-0.2895	0.05933	15	-4.88	0.0002	0.0299824		At1g67230.1	At1g67230.1	expressed protein [At1g67230.1]
A_84_P268790	TREATMENT	45 min col-0 treatment	45 min col-0 control	0.3541	0.07268	15	4.87	0.000203	0.0303109		At5g43350.1	At5g43350.1	inorganic phosphate transporter (PHT1) (PT1) identical to inorganic phosphate transporter [Arabidopsis thaliana] GI:2258116 [At5g43350.1]
A_84_P737887	TREATMENT	45 min col-0 treatment	45 min col-0 control	-0.5979	0.1229	15	-4.86	0.000206	0.0305157		BP611361	BP611361	BP611361 RAFL16 Arabidopsis thaliana cDNA clone RAFL16-85-H17 3', mRNA sequence [BP611361]
A_84_P20046	TREATMENT	45 min col-0 treatment	45 min col-0 control	-0.8188	0.1683	15	-4.86	0.000206	0.0305157		At1g14280.1	At1g14280.1	phytochrome kinase, putative contains similarity to Swiss-Prot:Q9SWI1 phytochrome kinase substrate 1 [Arabidopsis thaliana] [At1g14280.1]
A_84_P23069	TREATMENT	45 min col-0 treatment	45 min col-0 control	0.9209	0.1895	15	4.86	0.000208	0.0306906		At3g17690.1	At3g17690.1	cyclic nucleotide-binding transporter 2 / CNBT2 (CNGC19) identical to cyclic nucleotide-binding transporter 2 (CNBT2) GI:8131900 from [Arabidopsis thaliana]; member of the cyclic nucleotide-gated channel family (CNGC)- see PMID:11500563 [At3g17690.1]
A_84_P99486	TREATMENT	45 min col-0 treatment	45 min col-0 control	-0.5396	0.1113	15	-4.85	0.000212	0.0311582		At1g22330.1	At1g22330.1	RNA recognition motif (RRM)-containing protein similar to UBP1 interacting protein 1a [Arabidopsis thaliana] GI:19574236; contains InterPro entry IPR000504: RNA-binding region RNP-1 (RNA recognition motif) (RRM) [At1g22330.1]
A_84_P255410	TREATMENT	45 min col-0 treatment	45 min col-0 control	0.2844	0.05869	15	4.85	0.000214	0.0313293		At2g43340.1	At2g43340.1	expressed protein [At2g43340.1]
A_84_P537167	TREATMENT	45 min col-0 treatment	45 min col-0 control	-1.2656	0.2622	15	-4.83	0.000222	0.0318778		At5g41250.1	At5g41250.1	exostosin family protein contains Pfam profile: PF03016 exostosin family [At5g41250.1]
A_84_P11669	TREATMENT	45 min col-0 treatment	45 min col-0 control	-0.5306	0.1098	15	-4.83	0.000219	0.0318778		At2g03530.1	At2g03530.1	F-box family protein-related similar to A3 protein (Swiss-Prot:Q41706)(unknown function) [Vigna unguiculata]; contains 9 transmembrane domains; supported by tandem duplication of F-box family protein (GI:3805763) (TIGR_Ath1:At2g07140) [Arabidopsis...
A_84_P575781	TREATMENT	45 min col-0 treatment	45 min col-0 control	1.8518	0.3835	15	4.83	0.000221	0.0318778		At2g46770.1	At2g46770.1	no apical meristem (NAM) family protein contains Pfam PF02365: No apical meristem (NAM) domain; [At2g46770.1]
A_84_P14014	TREATMENT	45 min col-0 treatment	45 min col-0 control	0.6453	0.1337	15	4.83	0.000222	0.0318778		At5g40210.1	At5g40210.1	nodulin MtN21 family protein similar to MtN21 GI:2598575 (root nodule development) from [Medicago truncatula] [At5g40210.1]
A_84_P19365	TREATMENT	45 min col-0 treatment	45 min col-0 control	-0.5655	0.1171	15	-4.83	0.00022	0.0318778		At3g46600.1	At3g46600.1	scarecrow transcription factor family protein scarecrow-like 11 - Arabidopsis thaliana, EMBL:AF036307 [At3g46600.1]
A_84_P22732	TREATMENT	45 min col-0 treatment	45 min col-0 control	-1.2537	0.2609	15	-4.81	0.000231	0.0330436		At1g08860.1	At1g08860.1	copine, putative Similar to BONZAI1 [Arabidopsis thaliana] GI:15487382; contains Pfam profile PF00168: C2 domain [At1g08860.1]
A_84_P22783	TREATMENT	45 min col-0 treatment	45 min col-0 control	-0.6052	0.126	15	-4.8	0.000232	0.0330604		At1g72890.1	At1g72890.1	disease resistance protein (TIR-NBS class), putative domain signature TIR-NBS exists, suggestive of a disease resistance protein. [At1g72890.1]
A_84_P21811	TREATMENT	45 min col-0 treatment	45 min col-0 control	0.1544	0.03218	15	4.8	0.000234	0.0332191		At1g04410.1	At1g04410.1	malate dehydrogenase, cytosolic, putative strong similarity to malate dehydrogenase from Mesembryanthemum crystallinum [SP|O24047], Medicago sativa [SP|O48905], Prunus persica [GI:15982948]; contains InterPro entry IPR001236: Lactate/malate...
A_84_P16332	TREATMENT	45 min col-0 treatment	45 min col-0 control	0.9031	0.1884	15	4.79	0.000237	0.033392		At2g29450.1	At2g29450.1	glutathione S-transferase (103-1A) identical to Swiss-Prot:P46421 glutathione S-transferase 103-1A [Arabidopsis thaliana] [At2g29450.1]
A_84_P19362	TREATMENT	45 min col-0 treatment	45 min col-0 control	0.9947	0.2075	15	4.79	0.000237	0.033392		At3g46090.1	At3g46090.1	zinc finger (C2H2 type) family protein (ZAT7) identical to zinc finger protein ZAT7 [Arabidopsis thaliana] gi|1418341|emb|CAA67234; contains Pfam domain, PF00096: Zinc finger, C2H2 type [At3g46090.1]
A_84_P13898	TREATMENT	45 min col-0 treatment	45 min col-0 control	-1.1133	0.2324	15	-4.79	0.000238	0.0334074		At4g39000.1	At4g39000.1	glycosyl hydrolase family 9 protein endo-1,4-beta-glucanase precursor - Fragariax ananassa, PID:g3549291 [At4g39000.1]
A_84_P13507	TREATMENT	45 min col-0 treatment	45 min col-0 control	0.3186	0.06654	15	4.79	0.00024	0.0335624		At2g02230.1	At2g02230.1	F-box family protein / SKP1 interacting partner 3-related contains similarity to SKP1 interacting partner 3 GI:10716951 from [Arabidopsis thaliana] [At2g02230.1]
A_84_P212238	TREATMENT	45 min col-0 treatment	45 min col-0 control	1.3567	0.2836	15	4.78	0.000241	0.0335769		At5g13220.1	At5g13220.1	expressed protein [At5g13220.1]
A_84_P173241	TREATMENT	45 min col-0 treatment	45 min col-0 control	0.2172	0.04543	15	4.78	0.000242	0.0335914		At4g34340.1	At4g34340.1	expressed protein [At4g34340.1]
A_84_P15883	TREATMENT	45 min col-0 treatment	45 min col-0 control	-0.8115	0.17	15	-4.77	0.000247	0.0341589		At5g26920.1	At5g26920.1	calmodulin-binding protein similar to calmodulin-binding protein TCB60 GI:1698548 from [Nicotiana tabacum] [At5g26920.1]
A_84_P17453	TREATMENT	45 min col-0 treatment	45 min col-0 control	1.5342	0.3219	15	4.77	0.00025	0.0344467		At3g11180.1	At3g11180.1	oxidoreductase, 2OG-Fe(II) oxygenase family protein similar to leucoanthocyanidin dioxygenase GB:BAA20143 [Perilla frutescens], Malus domestica, SP|P51091; contains PF03171 2OG-Fe(II) oxygenase superfamily domain [At3g11180.1]
A_84_P18416	TREATMENT	45 min col-0 treatment	45 min col-0 control	0.8949	0.1884	15	4.75	0.000259	0.035556		At3g46080.1	At3g46080.1	zinc finger (C2H2 type) family protein contains zinc finger, C2H2 type, domain, PROSITE:PS00028 [At3g46080.1]
A_84_P17815	TREATMENT	45 min col-0 treatment	45 min col-0 control	0.4424	0.09321	15	4.75	0.00026	0.0355631		At5g45200.1	At5g45200.1	disease resistance protein (TIR-NBS-LRR class), putative domain signature TIR-NBS-LRR exists, suggestive of a disease resistance protein. [At5g45200.1]
A_84_P17392	TREATMENT	45 min col-0 treatment	45 min col-0 control	-0.4137	0.08723	15	-4.74	0.000262	0.0357063		At3g16720.1	At3g16720.1	zinc finger (C3HC4-type RING finger) family protein contains Pfam domain, PF00097: Zinc finger, C3HC4 type (RING finger) [At3g16720.1]
A_84_P23478	TREATMENT	45 min col-0 treatment	45 min col-0 control	-1.0125	0.2147	15	-4.72	0.000276	0.037478		At5g41750.1	At5g41750.1	disease resistance protein (TIR-NBS-LRR class), putative domain signature TIR-NBS-LRR exists, suggestive of a disease resistance protein. [At5g41750.1]
A_84_P23676	TREATMENT	45 min col-0 treatment	45 min col-0 control	0.3429	0.07273	15	4.71	0.000277	0.037478		At1g09680.1	At1g09680.1	pentatricopeptide (PPR) repeat-containing protein contains Pfam profile PF01535: PPR repeat [At1g09680.1]
A_84_P584960	TREATMENT	45 min col-0 treatment	45 min col-0 control	0.4724	0.1006	15	4.7	0.000286	0.0385526		At4g21500.1	At4g21500.1	expressed protein ; expression supported by MPSS [At4g21500.1]
A_84_P503428	TREATMENT	45 min col-0 treatment	45 min col-0 control	-0.4521	0.09627	15	-4.7	0.000287	0.0385526		At5g24105.1	At5g24105.1	expressed protein [At5g24105.1]
A_84_P17085	TREATMENT	45 min col-0 treatment	45 min col-0 control	0.9499	0.2024	15	4.69	0.000289	0.0386826		At1g05650.1	At1g05650.1	polygalacturonase, putative / pectinase, putative similar to polygalacturonase 5 [Lycopersicon esculentum] GI:2459817; contains Pfam profile PF00295: Glycosyl hydrolases family 28 (polygalacturonases) [At1g05650.1]
A_84_P80879	TREATMENT	45 min col-0 treatment	45 min col-0 control	0.8652	0.1848	15	4.68	0.000295	0.0393386		At2g46510.1	At2g46510.1	basic helix-loop-helix (bHLH) family protein contains Pfam profile: PF00010 helix-loop-helix DNA-binding domain [At2g46510.1]
A_84_P10224	TREATMENT	45 min col-0 treatment	45 min col-0 control	0.7145	0.1526	15	4.68	0.000296	0.0393386		At5g37770.1	At5g37770.1	touch-responsive protein / calmodulin-related protein 2, touch-induced (TCH2) identical to calmodulin-related protein 2,touch-induced SP:P25070 from [Arabidopsis thaliana] [At5g37770.1]
A_84_P599009	TREATMENT	45 min col-0 treatment	45 min col-0 control	1.1609	0.2483	15	4.68	0.000299	0.0395969		At3g09400.1	At3g09400.1	protein phosphatase 2C family protein / PP2C family protein similar to protein phosphatase-2c (GI:3608412) [Mesembryanthemum crystallinum]; contains Pfam PF00481 : Protein phosphatase 2C domain [At3g09400.1]
A_84_P311773	TREATMENT	45 min col-0 treatment	45 min col-0 control	0.5651	0.121	15	4.67	0.000302	0.0398534		At3g15810.1	At3g15810.1	expressed protein contains Pfam profile PF04525: Protein of unknown function (DUF567) [At3g15810.1]
A_84_P15111	TREATMENT	45 min col-0 treatment	45 min col-0 control	-0.3132	0.06716	15	-4.66	0.000306	0.0402395		At1g19835.1	At1g19835.1	expressed protein contains Pfam PF05911: Plant protein of unknown function (DUF869) [At1g19835.1]
A_84_P14679	TREATMENT	45 min col-0 treatment	45 min col-0 control	-0.1958	0.04211	15	-4.65	0.000314	0.04072		At3g56200.1	At3g56200.1	amino acid transporter family protein low similarity to N system amino acids transporter NAT-1 [Mus musculus] GI:7406950; belongs to INTERPRO:IPR002422 amino acid/polyamine transporter, family II [At3g56200.1]
A_84_P23350	TREATMENT	45 min col-0 treatment	45 min col-0 control	0.3525	0.07576	15	4.65	0.000312	0.04072		At4g37640.1	At4g37640.1	calcium-transporting ATPase 2, plasma membrane-type / Ca(2+)-ATPase isoform 2 (ACA2) identical to SP|O81108 Calcium-transporting ATPase 2, plasma membrane-type (EC 3.6.3.8) (Ca(2+)-ATPase isoform 2) {Arabidopsis thaliana} [At4g37640.1]
A_84_P511134	TREATMENT	45 min col-0 treatment	45 min col-0 control	-0.4084	0.08774	15	-4.66	0.000311	0.04072		At3g30580.1	At3g30580.1	expressed protein ; expression supported by MPSS [At3g30580.1]
A_84_P739563	TREATMENT	45 min col-0 treatment	45 min col-0 control	1.9294	0.4149	15	4.65	0.000314	0.04072		CHR1:027987259-027987200	CHR1:027987259-027987200	Unknown
A_84_P732531	TREATMENT	45 min col-0 treatment	45 min col-0 control	-0.5427	0.1172	15	-4.63	0.000328	0.0423889		CHR1:007886848-007886789	CHR1:007886848-007886789	Unknown
A_84_P23661	TREATMENT	45 min col-0 treatment	45 min col-0 control	-0.4248	0.09195	15	-4.62	0.000333	0.0428872		At1g61100.1	At1g61100.1	disease resistance protein (TIR class), putative domain signature TIR exists, suggestive of a disease resistance protein. [At1g61100.1]
A_84_P11613	TREATMENT	45 min col-0 treatment	45 min col-0 control	1.3017	0.2823	15	4.61	0.000339	0.0435104		At2g34930.1	At2g34930.1	disease resistance family protein contains leucine rich-repeat domains Pfam:PF00560, INTERPRO:IPR001611; similar to Cf-2.1 [Lycopersicon pimpinellifolium] gi|1184075|gb|AAC15779 [At2g34930.1]
A_84_P16308	TREATMENT	45 min col-0 treatment	45 min col-0 control	0.5747	0.1247	15	4.61	0.000341	0.0436177		At2g45400.1	At2g45400.1	dihydroflavonol 4-reductase family / dihydrokaempferol 4-reductase family similar to dihydroflavonol 4-reductase (SP:P51102), vestitone reductase (Medicago sativa, GI:973249) [At2g45400.1]
A_84_P18031	TREATMENT	45 min col-0 treatment	45 min col-0 control	0.8171	0.1774	15	4.6	0.000344	0.0438518		At1g05660.1	At1g05660.1	polygalacturonase, putative / pectinase, putative similar to polygalacturonase 5 [Lycopersicon esculentum] GI:2459817; contains Pfam profile PF00295: Glycosyl hydrolases family 28 (polygalacturonases) [At1g05660.1]
A_84_P13169	TREATMENT	45 min col-0 treatment	45 min col-0 control	-0.3116	0.0677	15	-4.6	0.000346	0.0439573		At5g66330.1	At5g66330.1	leucine-rich repeat family protein contains leucine rich-repeat domains Pfam:PF00560, INTERPRO:IPR001611; contains similarity to Hcr2-5B [Lycopersicon esculentum] gi|3894391|gb|AAC78595 [At5g66330.1]
A_84_P541120	TREATMENT	45 min col-0 treatment	45 min col-0 control	-0.2061	0.04489	15	-4.59	0.000353	0.0443951		At2g29525.1	At2g29525.1	expressed protein [At2g29525.1]
A_84_P263610	TREATMENT	45 min col-0 treatment	45 min col-0 control	-0.6393	0.1391	15	-4.59	0.000351	0.0443951		At4g14380.1	At4g14380.1	expressed protein [At4g14380.1]
A_84_P716829	TREATMENT	45 min col-0 treatment	45 min col-0 control	-1.7916	0.3902	15	-4.59	0.000353	0.0443951		CHR1:021477409-021477350	CHR1:021477409-021477350	Unknown
A_84_P18443	TREATMENT	45 min col-0 treatment	45 min col-0 control	0.4875	0.1064	15	4.58	0.00036	0.0450985		At3g52440.1	At3g52440.1	Dof-type zinc finger domain-containing protein DNA binding protein - Hordeum vulgare,PID:e1334094 [At3g52440.1]
A_84_P13877	TREATMENT	45 min col-0 treatment	45 min col-0 control	-0.389	0.08493	15	-4.58	0.000361	0.0450985		At4g33440.1	At4g33440.1	glycoside hydrolase family 28 protein / polygalacturonase (pectinase) family protein weak similarity to SP|P27644 Polygalacturonase (EC 3.2.1.15) (Pectinase) {Agrobacterium tumefaciens}; contains PF00295: Glycosyl hydrolases family 28 [At4g33440.1]
A_84_P562234	TREATMENT	45 min col-0 treatment	45 min col-0 control	0.3881	0.08483	15	4.58	0.000364	0.0451722		At1g59640.1	At1g59640.1	basic helix-loop-helix (bHLH) family protein [At1g59640.1]
A_84_P311633	TREATMENT	45 min col-0 treatment	45 min col-0 control	0.9811	0.2144	15	4.58	0.000364	0.0451722		At5g11070.1	At5g11070.1	expressed protein [At5g11070.1]
A_84_P19834	TREATMENT	45 min col-0 treatment	45 min col-0 control	0.4257	0.09321	15	4.57	0.000371	0.0458889		At1g20530.1	At1g20530.1	hypothetical protein [At1g20530.1]
A_84_P13410	TREATMENT	45 min col-0 treatment	45 min col-0 control	-0.2156	0.04725	15	-4.56	0.000374	0.0461078		At1g22050.1	At1g22050.1	ubiquitin family protein contains INTERPRO:IPR000626 ubiquitin domain [At1g22050.1]
A_84_P510552	TREATMENT	45 min col-0 treatment	45 min col-0 control	0.2569	0.05642	15	4.55	0.00038	0.0466939		At5g41100.1	At5g41100.1	expressed protein [At5g41100.1]
A_84_P61100	TREATMENT	45 min col-0 treatment	45 min col-0 control	0.6498	0.1428	15	4.55	0.000383	0.0467559		At5g12010.1	At5g12010.1	expressed protein [At5g12010.1]
A_84_P18762	TREATMENT	45 min col-0 treatment	45 min col-0 control	0.4099	0.09005	15	4.55	0.000382	0.0467559		At5g45580.1	At5g45580.1	myb family transcription factor contains Pfam profile: PF00249 myb-like DNA-binding domain [At5g45580.1]
A_84_P11046	TREATMENT	45 min col-0 treatment	45 min col-0 control	1.8469	0.4068	15	4.54	0.000391	0.0475776		At4g34410.1	At4g34410.1	AP2 domain-containing transcription factor, putative ethylene-responsive element binding protein homolog, Stylosanthes hamata, U91857 [At4g34410.1]
A_84_P21906	TREATMENT	45 min col-0 treatment	45 min col-0 control	-0.3193	0.07051	15	-4.53	0.0004	0.0485152		At1g36730.1	At1g36730.1	eukaryotic translation initiation factor 5, putative / eIF-5, putative similar to SP|P55876 Eukaryotic translation initiation factor 5 (eIF-5) {Zea mays}; contains Pfam profiles PF02020: eIF4-gamma/eIF5/eIF2-epsilon, PF01873: Domain found in IF2B/IF5...
A_84_P14858	TREATMENT	45 min col-0 treatment	45 min col-0 control	-0.3822	0.08455	15	-4.52	0.000406	0.0486136		At4g16950.1	At4g16950.1	disease resistance protein (TIR-NBS-LRR class), putative domain signature TIR-NBS-LRR exists, suggestive of a disease resistance protein.; closest homolog in Col-0 to RPP5 of clutivar Landsberg erecta. [At4g16950.1]
A_84_P558402	TREATMENT	45 min col-0 treatment	45 min col-0 control	0.7023	0.1554	15	4.52	0.000406	0.0486136		At5g37550.1	At5g37550.1	expressed protein [At5g37550.1]
A_84_P11184	TREATMENT	45 min col-0 treatment	45 min col-0 control	-0.697	0.154	15	-4.52	0.000403	0.0486136		At1g72240.1	At1g72240.1	expressed protein [At1g72240.1]
A_84_P133175	TREATMENT	45 min col-0 treatment	45 min col-0 control	0.296	0.06547	15	4.52	0.000406	0.0486136		At2g32295.1	At2g32295.1	EXS family protein / ERD1/XPR1/SYG1 family protein low similarity to xenotropic and polytropic murine leukemia virus receptor [Mustela vison] GI:6093316; contains Pfam profile PF03124: EXS family [At2g32295.1]
A_84_P24135	TREATMENT	45 min col-0 treatment	45 min col-0 control	0.6149	0.1361	15	4.52	0.000408	0.0486975		At3g55710.1	At3g55710.1	UDP-glucoronosyl/UDP-glucosyl transferase family protein contains Pfam profile: PF00201 UDP-glucoronosyl and UDP-glucosyl transferase [At3g55710.1]
A_84_P21473	TREATMENT	45 min col-0 treatment	45 min col-0 control	-1.3321	0.2956	15	-4.51	0.000418	0.0492266		At4g15210.1	At4g15210.1	beta-amylase (BMY1) / 1,4-alpha-D-glucan maltohydrolase identical to Beta-amylase (EC 3.2.1.2) (1,4-alpha-D-glucan maltohydrolase) SP:P25853 [Arabidopsis thaliana] [At4g15210.1]
A_84_P24062	TREATMENT	45 min col-0 treatment	45 min col-0 control	0.4803	0.1066	15	4.5	0.000419	0.0492266		At3g23920.1	At3g23920.1	beta-amylase, putative / 1,4-alpha-D-glucan maltohydrolase, putative similar to beta-amylase enzyme [Arabidopsis thaliana] GI:6065749, beta-amylase PCT-BMYI from [Solanum tuberosum]; contains Pfam profile PF01373: Glycosyl hydrolase family 14...
A_84_P559780	TREATMENT	45 min col-0 treatment	45 min col-0 control	-1.094	0.2428	15	-4.51	0.000418	0.0492266		At2g46480.1	At2g46480.1	glycosyl transferase family 8 protein contains Pfam profile: PF01501 glycosyl transferase family 8; [At2g46480.1]
A_84_P14685	TREATMENT	45 min col-0 treatment	45 min col-0 control	-0.1689	0.03746	15	-4.51	0.000415	0.0492266		At3g57730.1	At3g57730.1	protein kinase, putative contains protein kinase domain, Pfam:PF00069 [At3g57730.1]
A_84_P574794	TREATMENT	45 min col-0 treatment	45 min col-0 control	-0.6604	0.1465	15	-4.51	0.000418	0.0492266		At2g20145.1	At2g20145.1	Toll-Interleukin-Resistance (TIR) domain-containing protein domain signature TIR exists, suggestive of a disease resistance protein. [At2g20145.1]
A_84_P11078	TREATMENT	45 min col-0 treatment	45 min col-0 control	-0.6691	0.1487	15	-4.5	0.000423	0.0495412		At4g16920.1	At4g16920.1	disease resistance protein (TIR-NBS-LRR class), putative domain signature TIR-NBS-LRR exists, suggestive of a disease resistance protein. [At4g16920.1]
A_84_P18492	TREATMENT	45 min col-0 treatment	45 min col-0 control	1.8802	0.4182	15	4.5	0.000426	0.0496991		At3g44870.1	At3g44870.1	S-adenosyl-L-methionine:carboxyl methyltransferase family protein similar to defense-related protein cjs1 [Brassica carinata][GI:14009292][Mol Plant Pathol (2001) 2(3):159-169] [At3g44870.1]
A_84_P13965	TREATMENT	45 min col-0 treatment	45 min col-0 control	-0.5125	0.114	15	-4.5	0.000427	0.0496991		At1g49780.1	At1g49780.1	U-box domain-containing protein similar to immediate-early fungal elicitor protein CMPG1 [Petroselinum crispum] GI:14582200; contains Pfam profile PF04564: U-box domain [At1g49780.1]
A_84_P102986	TREATMENT	45 min col-0 treatment	45 min col-0 control	0.5201	0.1158	15	4.49	0.000432	0.0498169		At2g27080.1	At2g27080.1	harpin-induced protein-related / HIN1-related / harpin-responsive protein-related contains 1 transmembrane domain; similar to hin1 homolog (GI:13122296) [Arabidopsis thaliana]; similar to hin1 (GI:22830759) [Nicotiana tabacum] [At2g27080.1]
A_84_P738888	TREATMENT	45 min col-0 treatment	45 min col-0 control	-1.5529	0.3458	15	-4.49	0.000431	0.0498169		BU917434	BU917434	JKHR01E06 Size-selected small cDNAs of Arabidopsis thaliana Arabidopsis thaliana cDNA clone JKHR01E06, mRNA sequence [BU917434]
A_84_P134385	TREATMENT	45 min col-0 treatment	45 min col-0 control	-0.4128	0.09194	15	-4.49	0.000432	0.0498169		At2g01910.1	At2g01910.1	microtubule associated protein (MAP65/ASE1) family protein low similarity to protein regulating cytokinesis 1 (PRC1) [Homo sapiens] GI:2865521; contains Pfam profile PF03999: Microtubule associated protein (MAP65/ASE1 family) [At2g01910.1]

## Sheet: significant genes Time 90
GENE	Effect	_TREATMENT	TREATMENT	Log2(Fold Change treatment vs control)	StdErr	DF	tValue	Probt	q-value		GeneName	SystematicName	Description
A_84_P15599	TREATMENT	90 min col-0 treatment	45 min col-0 control	-1.4585	0.09493	15	15.36	1.38e-10	2.107e-06		At3g50820.1	At3g50820.1	oxygen-evolving enhancer protein, chloroplast, putative / 33 kDa subunit of oxygen evolving system of photosystem II, putative (PSBO2) identical to SP:Q9S841 Oxygen-evolving enhancer protein 1-2, chloroplast precursor (OEE1) [Arabidopsis thaliana];...
A_84_P12302	TREATMENT	90 min col-0 treatment	45 min col-0 control	-1.4056	0.09014	15	15.59	1.12e-10	2.107e-06		At1g62510.1	At1g62510.1	protease inhibitor/seed storage/lipid transfer protein (LTP) family protein contains Pfam protease inhibitor/seed storage/LTP family domain PF00234 [At1g62510.1]
A_84_P529946	TREATMENT	90 min col-0 treatment	45 min col-0 control	-1.8284	0.1327	15	13.78	6.38e-10	4.87054e-06		At4g37235.1	At4g37235.1	expressed protein [At4g37235.1]
A_84_P10996	TREATMENT	90 min col-0 treatment	45 min col-0 control	-1.7162	0.1225	15	14.01	5.06e-10	4.87054e-06		At4g23070.1	At4g23070.1	rhomboid family protein contains PFAM domain PF01694, Rhomboid family [At4g23070.1]
A_84_P13790	TREATMENT	90 min col-0 treatment	45 min col-0 control	-0.9689	0.07152	15	13.55	8.11e-10	4.95299e-06		At4g08950.1	At4g08950.1	phosphate-responsive protein, putative (EXO) similar to phi-1 (phosphate-induced gene) [Nicotiana tabacum] GI:3759184; contains Pfam profile PF04674: Phosphate-induced protein 1 conserved region [At4g08950.1]
A_84_P180254	TREATMENT	90 min col-0 treatment	45 min col-0 control	-1.3825	0.1076	15	12.85	1.69e-09	6.10726e-06		At4g12510.1	At4g12510.1	protease inhibitor/seed storage/lipid transfer protein (LTP) family protein similar to 14 kDa polypeptide [Catharanthus roseus] GI:407410; contains Pfam protease inhibitor/seed storage/LTP family domain PF00234 [At4g12510.1]
A_84_P526889	TREATMENT	90 min col-0 treatment	45 min col-0 control	-1.3183	0.1028	15	12.83	1.73e-09	6.10726e-06		At2g17300.1	At2g17300.1	expressed protein [At2g17300.1]
A_84_P22981	TREATMENT	90 min col-0 treatment	45 min col-0 control	-1.3114	0.1025	15	12.79	1.8e-09	6.10726e-06		At2g21880.1	At2g21880.1	Ras-related GTP-binding protein, putative similar to Ras family GTP-binding protein SP:Q43463 from [Glycine max] [At2g21880.1]
A_84_P141979	TREATMENT	90 min col-0 treatment	45 min col-0 control	-1.2137	0.09295	15	13.06	1.35e-09	6.10726e-06		At5g65390.1	At5g65390.1	arabinogalactan-protein (AGP7) [At5g65390.1]
A_84_P302000	TREATMENT	90 min col-0 treatment	45 min col-0 control	-1.7669	0.1419	15	12.45	2.61e-09	6.64751e-06		At5g53250.1	At5g53250.1	arabinogalactan-protein, putative (AGP22) similar to arabinogalactan protein [Arabidopsis thaliana] gi|10880509|gb|AAG24284 [At5g53250.1]
A_84_P18425	TREATMENT	90 min col-0 treatment	45 min col-0 control	-0.9986	0.08064	15	12.38	2.81e-09	6.64751e-06		At3g47960.1	At3g47960.1	proton-dependent oligopeptide transport (POT) family protein contains Pfam profile: PF00854 POT family [At3g47960.1]
A_84_P19314	TREATMENT	90 min col-0 treatment	45 min col-0 control	-0.73	0.05898	15	12.38	2.83e-09	6.64751e-06		At3g24720.1	At3g24720.1	protein kinase family protein protein kinase family; similar to tyrosine-protein kinase GB:P18160 from [Dictyostelium discoideum] [At3g24720.1]
A_84_P305650	TREATMENT	90 min col-0 treatment	45 min col-0 control	0.6861	0.05455	15	-12.58	2.27e-09	6.64751e-06		At2g30500.1	At2g30500.1	kinase interacting family protein similar to kinase interacting protein 1 (GI:13936326) [Petunia integrifolia] [At2g30500.1]
A_84_P208088	TREATMENT	90 min col-0 treatment	45 min col-0 control	-0.9628	0.08218	15	11.72	6e-09	1.3087e-05		At5g10430.1	At5g10430.1	arabinogalactan-protein (AGP4) identical to gi_3883126_gb_AAC77826 [At5g10430.1]
A_84_P23158	TREATMENT	90 min col-0 treatment	45 min col-0 control	-1.3032	0.1135	15	11.48	7.86e-09	1.6001e-05		At3g48940.1	At3g48940.1	remorin family protein contains Pfam domain, PF03766: Remorin, N-terminal region and Pfam domain, PF03763: Remorin, C-terminal region [At3g48940.1]
A_84_P183184	TREATMENT	90 min col-0 treatment	45 min col-0 control	-1.3539	0.1186	15	11.42	8.52e-09	1.62606e-05		At4g26320.1	At4g26320.1	arabinogalactan-protein (AGP13) identical to gi|10880503|gb|AAG24281 [At4g26320.1]
A_84_P170753	TREATMENT	90 min col-0 treatment	45 min col-0 control	-1.6667	0.1486	15	11.22	1.08e-08	1.93995e-05		At5g02890.1	At5g02890.1	transferase family protein contains Pfam profile PF02458: Transferase family [At5g02890.1]
A_84_P251575	TREATMENT	90 min col-0 treatment	45 min col-0 control	-1.492	0.1342	15	11.12	1.21e-08	1.96075e-05		At4g12520.1	At4g12520.1	protease inhibitor/seed storage/lipid transfer protein (LTP) family protein similar to 14 kDa polypeptide [Catharanthus roseus] GI:407410; contains Pfam protease inhibitor/seed storage/LTP family domain PF00234 [At4g12520.1]
A_84_P174101	TREATMENT	90 min col-0 treatment	45 min col-0 control	-1.2684	0.1141	15	11.12	1.22e-08	1.96075e-05		At1g55330.1	At1g55330.1	arabinogalactan-protein (AGP21) [At1g55330.1]
A_84_P16443	TREATMENT	90 min col-0 treatment	45 min col-0 control	-0.805	0.07277	15	11.06	1.3e-08	1.98486e-05		At3g06770.1	At3g06770.1	glycoside hydrolase family 28 protein / polygalacturonase (pectinase) family protein weak similarity to polygalacturonase [Persea americana] GI:166951; contains PF00295: Glycosyl hydrolases family 28 (polygalacturonases) [At3g06770.1]
A_84_P15139	TREATMENT	90 min col-0 treatment	45 min col-0 control	-0.84	0.07719	15	10.88	1.63e-08	2.3702e-05		At1g03870.1	At1g03870.1	fasciclin-like arabinogalactan-protein (FLA9) identical to gi_13377784_gb_AAK20861 [At1g03870.1]
A_84_P17145	TREATMENT	90 min col-0 treatment	45 min col-0 control	-3.3981	0.3137	15	10.83	1.73e-08	2.40126e-05		At1g63030.1	At1g63030.1	AP2 domain-containing transcription factor, putative similar to DREB1A [Arabidopsis thaliana] GI:3738224; contains Pfam profile PF00847: AP2 domain [At1g63030.1]
A_84_P13596	TREATMENT	90 min col-0 treatment	45 min col-0 control	-1.7165	0.1593	15	10.77	1.86e-08	2.46946e-05		At3g05860.1	At3g05860.1	MADS-box protein (AGL45) similar to MADS-box protein; PMID: 12837945; contains Pfam profile PF00319: SRF-type transcription factor (DNA-binding and dimerisation domain) [At3g05860.1]
A_84_P19625	TREATMENT	90 min col-0 treatment	45 min col-0 control	-2.1672	0.2035	15	10.65	2.18e-08	2.77371e-05		CHR5:003160075-003160259	CHR5:003160075-003160259	Unknown
A_84_P13240	TREATMENT	90 min col-0 treatment	45 min col-0 control	-0.4017	0.03803	15	10.56	2.42e-08	2.95591e-05		At1g47740.1	At1g47740.1	expressed protein [At1g47740.1]
A_84_P21594	TREATMENT	90 min col-0 treatment	45 min col-0 control	-1.1223	0.1068	15	10.51	2.59e-08	3.04188e-05		At5g44130.1	At5g44130.1	fasciclin-like arabinogalactan-protein, putative similar to gi_13377784_gb_AAK20861 [At5g44130.1]
A_84_P15816	TREATMENT	90 min col-0 treatment	45 min col-0 control	-1.1028	0.1062	15	10.38	3.03e-08	3.42685e-05		At5g02270.1	At5g02270.1	ABC transporter family protein NBD-like protein POP, Arabidopsis thaliana, EMBL:AF127664 [At5g02270.1]
A_84_P269770	TREATMENT	90 min col-0 treatment	45 min col-0 control	-2.228	0.2152	15	10.35	3.16e-08	3.44624e-05		At2g17590.1	At2g17590.1	DC1 domain-containing protein contains Pfam profile PF03107: DC1 domain [At2g17590.1]
A_84_P511702	TREATMENT	90 min col-0 treatment	45 min col-0 control	-1.1799	0.1192	15	9.9	5.71e-08	5.85279e-05		At1g53625.1	At1g53625.1	expressed protein [At1g53625.1]
A_84_P15501	TREATMENT	90 min col-0 treatment	45 min col-0 control	4.2206	0.4266	15	-9.89	5.75e-08	5.85279e-05		At3g15370.1	At3g15370.1	expansin, putative (EXP12) similar to expansin GI:11191999 from [Lycopersicon esculentum]; alpha-expansin gene family, PMID:11641069 [At3g15370.1]
A_84_P15415	TREATMENT	90 min col-0 treatment	45 min col-0 control	-1.2018	0.122	15	9.85	6.1e-08	5.9592e-05		At2g18800.1	At2g18800.1	xyloglucan:xyloglucosyl transferase, putative / xyloglucan endotransglycosylase, putative / endo-xyloglucan transferase, putative similar to xyloglucan endotransglycosylase TCH4 GI:886116 from [Arabidopsis thaliana] [At2g18800.1]
A_84_P13038	TREATMENT	90 min col-0 treatment	45 min col-0 control	-0.8147	0.08306	15	9.81	6.44e-08	5.9592e-05		At5g24100.1	At5g24100.1	leucine-rich repeat transmembrane protein kinase, putative [At5g24100.1]
A_84_P19960	TREATMENT	90 min col-0 treatment	45 min col-0 control	3.3091	0.3366	15	-9.83	6.26e-08	5.9592e-05		At1g78390.1	At1g78390.1	9-cis-epoxycarotenoid dioxygenase, putative / neoxanthin cleavage enzyme, putative / carotenoid cleavage dioxygenase, putative similar to 9-cis-epoxycarotenoid dioxygenase [Phaseolus vulgaris][GI:6715257]; similar to neoxanthin cleavage enzyme...
A_84_P17588	TREATMENT	90 min col-0 treatment	45 min col-0 control	-0.6113	0.06289	15	9.72	7.25e-08	6.51141e-05		At4g12730.1	At4g12730.1	fasciclin-like arabinogalactan-protein (FLA2) identical to gi_13377778_gb_AAK20858 [At4g12730.1]
A_84_P97916	TREATMENT	90 min col-0 treatment	45 min col-0 control	0.9502	0.09832	15	-9.66	7.82e-08	6.82268e-05		At4g29780.1	At4g29780.1	expressed protein [At4g29780.1]
A_84_P570783	TREATMENT	90 min col-0 treatment	45 min col-0 control	-2.095	0.2193	15	9.55	9.09e-08	7.71041e-05		At5g10100.1	At5g10100.1	trehalose-6-phosphate phosphatase, putative similar to trehalose-6-phosphate phosphatase (AtTPPB) [Arabidopsis thaliana] GI:2944180; contains Pfam profile PF02358: Trehalose-phosphatase [At5g10100.1]
A_84_P12382	TREATMENT	90 min col-0 treatment	45 min col-0 control	-0.9951	0.1047	15	9.5	9.74e-08	8.03847e-05		At1g53830.1	At1g53830.1	pectinesterase family protein identical to pectinesterase 2 (PME2/ PE 2) SP:Q42534 from [Arabidopsis thaliana];contains Pfam profiles: PF01095 pectinesterase, PF04043 plant invertase/pectin methylesterase inhibitor [At1g53830.1]
A_84_P247395	TREATMENT	90 min col-0 treatment	45 min col-0 control	-1.0986	0.1167	15	9.41	1.1e-07	8.83945e-05		At3g26470.1	At3g26470.1	expressed protein [At3g26470.1]
A_84_P281390	TREATMENT	90 min col-0 treatment	45 min col-0 control	-1.0412	0.1118	15	9.31	1.26e-07	9.86557e-05		At4g01140.1	At4g01140.1	expressed protein [At4g01140.1]
A_84_P305850	TREATMENT	90 min col-0 treatment	45 min col-0 control	2.4587	0.2667	15	-9.22	1.44e-07	0.000109931		At2g02010.1	At2g02010.1	glutamate decarboxylase, putative strong similarity to glutamate decarboxylase isozyme 3 [Nicotiana tabacum] GI:13752462 [At2g02010.1]
A_84_P14286	TREATMENT	90 min col-0 treatment	45 min col-0 control	-1.1754	0.1283	15	9.16	1.56e-07	0.000116187		At1g78260.1	At1g78260.1	RNA recognition motif (RRM)-containing protein similar to RNA recognition motif-containing protein SEB-4 GI:8895698 from [Xenopus laevis]; contains InterPro entry IPR000504: RNA-binding region RNP-1 (RNA recognition motif) (RRM) [At1g78260.1]
A_84_P15732	TREATMENT	90 min col-0 treatment	45 min col-0 control	-0.4862	0.05356	15	9.08	1.76e-07	0.000127962		At4g25390.1	At4g25390.1	protein kinase family protein contains protein kinase domain, Pfam:PF00069 [At4g25390.1]
A_84_P597689	TREATMENT	90 min col-0 treatment	45 min col-0 control	-1.3064	0.1454	15	8.99	2e-07	0.000140069		At5g65340.1	At5g65340.1	expressed protein contains Pfam profile PF04759: Protein of unknown function, DUF617 [At5g65340.1]
A_84_P21380	TREATMENT	90 min col-0 treatment	45 min col-0 control	-0.8688	0.09707	15	8.95	2.11e-07	0.000140069		At4g18760.1	At4g18760.1	leucine-rich repeat family protein contains leucine rich-repeat domains Pfam:PF00560, INTERPRO:IPR001611 [At4g18760.1]
A_84_P542440	TREATMENT	90 min col-0 treatment	45 min col-0 control	-0.7297	0.0815	15	8.95	2.1e-07	0.000140069		At5g23750.2	At5g23750.2	remorin family protein contains Pfam domain, PF03766: Remorin, N-terminal region; contains Pfam domain, PF03763: Remorin, C-terminal region [At5g23750.2]
A_84_P544712	TREATMENT	90 min col-0 treatment	45 min col-0 control	0.2985	0.03332	15	-8.96	2.08e-07	0.000140069		At2g40640.1	At2g40640.1	expressed protein [At2g40640.1]
A_84_P19702	TREATMENT	90 min col-0 treatment	45 min col-0 control	-1.5043	0.1697	15	8.86	2.39e-07	0.000152045		At5g44110.1	At5g44110.1	ABC transporter family protein [At5g44110.1]
A_84_P10647	TREATMENT	90 min col-0 treatment	45 min col-0 control	-1.3645	0.1539	15	8.87	2.37e-07	0.000152045		At2g26480.1	At2g26480.1	UDP-glucoronosyl/UDP-glucosyl transferase family protein contains Pfam profile: PF00201 UDP-glucoronosyl and UDP-glucosyl transferase [At2g26480.1]
A_84_P582920	TREATMENT	90 min col-0 treatment	45 min col-0 control	-1.4284	0.1618	15	8.83	2.51e-07	0.000156274		At2g45760.1	At2g45760.1	BON1-associated protein (BAP1)-related similar to BON1-associated protein 1 BAP1 [Arabidopsis thaliana] GI:15487384; contains Pfam profile PF00168: C2 domain [At2g45760.1]
A_84_P711969	TREATMENT	90 min col-0 treatment	45 min col-0 control	0.8157	0.0926	15	-8.81	2.58e-07	0.000156274		TC267965	TC267965	Arabidopsis thaliana Full-length cDNA Complete sequence from clone GSLTSIL62ZC05 of Silique of strain col-0 of Arabidopsis thaliana (thale cress) [BX818124]
A_84_P544251	TREATMENT	90 min col-0 treatment	45 min col-0 control	1.9165	0.2178	15	-8.8	2.61e-07	0.000156274		At5g38700.1	At5g38700.1	expressed protein [At5g38700.1]
A_84_P94909	TREATMENT	90 min col-0 treatment	45 min col-0 control	0.1902	0.0217	15	-8.77	2.74e-07	0.000160903		At3g61350.1	At3g61350.1	SKP1 interacting partner 4 (SKIP4) almost idential to SKP1 interacting partner 4 GI:10716953 from [Arabidopsis thaliana], 42 aa extension at N-terminal; contains Pfam profiles PF01344: Kelch motif, PF00646: F-box domain [At3g61350.1]
A_84_P18376	TREATMENT	90 min col-0 treatment	45 min col-0 control	-1.2464	0.1427	15	8.74	2.86e-07	0.000161729		At3g23730.1	At3g23730.1	xyloglucan:xyloglucosyl transferase, putative / xyloglucan endotransglycosylase, putative / endo-xyloglucan transferase, putative similar to xyloglucan endotransglycosylase-related protein GI:1244760 from [Arabidopsis thaliana] [At3g23730.1]
A_84_P202258	TREATMENT	90 min col-0 treatment	45 min col-0 control	-0.4704	0.05379	15	8.74	2.83e-07	0.000161729		At3g07470.1	At3g07470.1	expressed protein contains Pfam profile PF04398: Protein of unknown function, DUF538 [At3g07470.1]
A_84_P12620	TREATMENT	90 min col-0 treatment	45 min col-0 control	2.5355	0.2917	15	-8.69	3.05e-07	0.000169338		At2g02990.1	At2g02990.1	ribonuclease 1 (RNS1) identical to ribonuclease SP:P42813 Ribonuclease 1 precursor (EC 3.1.27.1) {Arabidopsis thaliana}, GI:561998 from [Arabidopsis thaliana] [At2g02990.1]
A_84_P15192	TREATMENT	90 min col-0 treatment	45 min col-0 control	-0.7858	0.09071	15	8.66	3.18e-07	0.000173402		At1g30690.1	At1g30690.1	SEC14 cytosolic factor family protein / phosphoglyceride transfer family protein contains Pfam PF00650 : CRAL/TRIO domain; contains Pfam PF03765 : CRAL/TRIO, N-terminus; similar to cytosolic factor (Phosphatidylinositol/phosphatidylcholine transfer...
A_84_P295884	TREATMENT	90 min col-0 treatment	45 min col-0 control	-0.5873	0.06805	15	8.63	3.34e-07	0.000175847		At2g04780.1	At2g04780.1	fasciclin-like arabinogalactan-protein (FLA7) identical to gi_13377782_gb_AAK20860 [At2g04780.1]
A_84_P504716	TREATMENT	90 min col-0 treatment	45 min col-0 control	0.3061	0.03543	15	-8.64	3.3e-07	0.000175847		At2g13840.1	At2g13840.1	PHP domain-containing protein contains Pfam PF02231: PHP domain N-terminal region and Pfam PF02811: PHP domain C-terminal region; identical to Protein trpH. (Swiss-Prot:O54453) [Salmonella typhimurium] [At2g13840.1]
A_84_P201948	TREATMENT	90 min col-0 treatment	45 min col-0 control	-1.0804	0.1263	15	8.56	3.72e-07	0.000192534		At4g35320.1	At4g35320.1	expressed protein predicted protein, Arabidopsis thaliana [At4g35320.1]
A_84_P12502	TREATMENT	90 min col-0 treatment	45 min col-0 control	-0.865	0.1015	15	8.52	3.91e-07	0.000196233		At2g25810.1	At2g25810.1	tonoplast intrinsic protein, putative similar to tonoplast intrinsic protein GI:4584429 from [Nicotiana tabacum] [At2g25810.1]
A_84_P581864	TREATMENT	90 min col-0 treatment	45 min col-0 control	0.4529	0.05314	15	-8.52	3.92e-07	0.000196233		At1g73380.2	At1g73380.2	expressed protein [At1g73380.2]
A_84_P295584	TREATMENT	90 min col-0 treatment	45 min col-0 control	-0.5487	0.06453	15	8.5	4.03e-07	0.000198486		At4g00330.1	At4g00330.1	protein kinase family protein contains protein kinase domain, Pfam:PF00069 [At4g00330.1]
A_84_P555846	TREATMENT	90 min col-0 treatment	45 min col-0 control	-1.1131	0.1313	15	8.48	4.19e-07	0.000202303		At5g65030.1	At5g65030.1	expressed protein ; expression supported by MPSS [At5g65030.1]
A_84_P23884	TREATMENT	90 min col-0 treatment	45 min col-0 control	-0.8793	0.1038	15	8.47	4.24e-07	0.000202303		At2g23130.1	At2g23130.1	arabinogalactan-protein (AGP17) identical to gi_11935086_gb_AAG41963 [At2g23130.1]
A_84_P18566	TREATMENT	90 min col-0 treatment	45 min col-0 control	1.2888	0.1541	15	-8.36	4.97e-07	0.000233485		At4g24570.1	At4g24570.1	mitochondrial substrate carrier family protein contains Pfam profile: PF00153 mitochondrial carrier protein [At4g24570.1]
A_84_P600237	TREATMENT	90 min col-0 treatment	45 min col-0 control	0.7575	0.09092	15	-8.33	5.2e-07	0.000240589		At5g23700.1	At5g23700.1	hypothetical protein [At5g23700.1]
A_84_P582351	TREATMENT	90 min col-0 treatment	45 min col-0 control	1.3333	0.1603	15	-8.32	5.3e-07	0.000241556		At5g05965.1	At5g05965.1	hypothetical protein [At5g05965.1]
A_84_P23582	TREATMENT	90 min col-0 treatment	45 min col-0 control	-1.9286	0.2322	15	8.31	5.4e-07	0.000242494		At5g15950.1	At5g15950.1	adenosylmethionine decarboxylase family protein contains Pfam profile: PF01536 adenosylmethionine decarboxylase [At5g15950.1]
A_84_P199584	TREATMENT	90 min col-0 treatment	45 min col-0 control	-0.4666	0.05626	15	8.29	5.51e-07	0.000243848		At3g14200.1	At3g14200.1	DNAJ heat shock N-terminal domain-containing protein low similarity to SP|O75190|DJB6_HUMAN DnaJ homolog subfamily B member 6 (Heat shock protein J2) {Homo sapiens}; contains Pfam profile PF00226 DnaJ domain [At3g14200.1]
A_84_P288654	TREATMENT	90 min col-0 treatment	45 min col-0 control	-1.0858	0.1311	15	8.28	5.6e-07	0.00024429		At1g22530.1	At1g22530.1	SEC14 cytosolic factor family protein / phosphoglyceride transfer family protein contains Pfam PF00650 : CRAL/TRIO domain; contains Pfam PF03765 : CRAL/TRIO, N-terminus; similar to SEC14-like protein 2 (Alpha-tocopherol associated protein) (TAP)...
A_84_P14717	TREATMENT	90 min col-0 treatment	45 min col-0 control	2.6667	0.3247	15	-8.21	6.23e-07	0.000267945		At4g01630.1	At4g01630.1	expansin, putative (EXP17) similar to alpha-expansin precursor GI:4027891 from [Nicotiana tabacum]; alpha-expansin gene family, PMID:11641069 [At4g01630.1]
A_84_P18192	TREATMENT	90 min col-0 treatment	45 min col-0 control	-1.155	0.1417	15	8.15	6.82e-07	0.000289247		At2g20750.1	At2g20750.1	beta-expansin, putative (EXPB1) identical to beta-expansin [Arabidopsis thaliana] gi|2224913|gb|AAB61709; similar to SP:O04701 major pollen allergen, Bermuda grass [Cynodon dactylon]; beta-expansin gene family, PMID:11641069 [At2g20750.1]
A_84_P503082	TREATMENT	90 min col-0 treatment	45 min col-0 control	0.8996	0.1106	15	-8.13	7.04e-07	0.000294487		At3g10300.1	At3g10300.1	calcium-binding EF hand family protein low similarity to SP|P12815 Programmed cell death protein 6 (Probable calcium-binding protein ALG-2) {Mus musculus}; contains INTERPRO:IPR002048 calcium-binding EF-hand domain [At3g10300.1]
A_84_P12847	TREATMENT	90 min col-0 treatment	45 min col-0 control	-1.0245	0.1273	15	8.05	7.97e-07	0.000327863		At1g06120.1	At1g06120.1	fatty acid desaturase family protein similar to delta 9 acyl-lipid desaturase GB:BAA25180 GI:2970034 (ADS1) from [Arabidopsis thaliana]; supported by cDNA:gi_12083275_gb_AF332434.1_AF332434 [At1g06120.1]
A_84_P16735	TREATMENT	90 min col-0 treatment	45 min col-0 control	1.4984	0.1864	15	-8.04	8.1e-07	0.000327863		At4g39070.1	At4g39070.1	zinc finger (B-box type) family protein salt-tolerance protein - Arabidopsis thaliana, PID:e224078 [At4g39070.1]
A_84_P12863	TREATMENT	90 min col-0 treatment	45 min col-0 control	2.3195	0.2887	15	-8.04	8.16e-07	0.000327863		At4g13420.1	At4g13420.1	potassium transporter (HAK5) identical to K+ transporter HAK5 [Arabidopsis thaliana] gi|7108597|gb|AAF36490; similar to high-affinity potassium transporter AtKUP1p [Arabidopsis thaliana] gi|2688979|gb|AAB88901; KUP/HAK/KT Transporter family member,...
A_84_P15800	TREATMENT	90 min col-0 treatment	45 min col-0 control	0.4348	0.05424	15	-8.02	8.39e-07	0.000332727		At4g15920.1	At4g15920.1	nodulin MtN3 family protein similar to MtN3 GI:1619602 (root nodule development) from [Medicago truncatula] [At4g15920.1]
A_84_P301260	TREATMENT	90 min col-0 treatment	45 min col-0 control	0.7496	0.09361	15	-8.01	8.51e-07	0.000333159		At1g74450.1	At1g74450.1	expressed protein [At1g74450.1]
A_84_P257040	TREATMENT	90 min col-0 treatment	45 min col-0 control	-2.2569	0.2836	15	7.96	9.17e-07	0.000344837		At4g16860.1	At4g16860.1	disease resistance protein (TIR-NBS-LRR class), putative domain signature TIR-NBS-LRR exists, suggestive of a disease resistance protein. [At4g16860.1]
A_84_P18476	TREATMENT	90 min col-0 treatment	45 min col-0 control	-0.9445	0.1186	15	7.96	9.14e-07	0.000344837		At3g59830.1	At3g59830.1	ankyrin protein kinase, putative similar to ankyrin-kinase [Medicago truncatula] gi|18700701|gb|AAL78674 [At3g59830.1]
A_84_P503428	TREATMENT	90 min col-0 treatment	45 min col-0 control	-0.7656	0.09627	15	7.95	9.26e-07	0.000344837		At5g24105.1	At5g24105.1	expressed protein [At5g24105.1]
A_84_P297064	TREATMENT	90 min col-0 treatment	45 min col-0 control	-0.6029	0.07564	15	7.97	9e-07	0.000344837		At1g65310.1	At1g65310.1	xyloglucan:xyloglucosyl transferase, putative / xyloglucan endotransglycosylase, putative / endo-xyloglucan transferase, putative similar to xyloglucan endotransglycosylase TCH4 GI:886116 from [Arabidopsis thaliana] [At1g65310.1]
A_84_P15868	TREATMENT	90 min col-0 treatment	45 min col-0 control	1.3975	0.1765	15	-7.92	9.77e-07	0.000359445		At5g22380.1	At5g22380.1	no apical meristem (NAM) family protein contains Pfam PF02365: No apical meristem (NAM) domain; [At5g22380.1]
A_84_P51530	TREATMENT	90 min col-0 treatment	45 min col-0 control	-0.7661	0.09745	15	7.86	1.07e-06	0.000379071		At2g22470.1	At2g22470.1	arabinogalactan-protein (AGP2) identical to gi|3883122|gb|AAC77824; supported by cDNA gi|3883121|gb|AF082299 [At2g22470.1]
A_84_P568326	TREATMENT	90 min col-0 treatment	45 min col-0 control	-0.6458	0.08222	15	7.85	1.08e-06	0.000379071		At1g09812.1	At1g09812.1	expressed protein ; expression supported by MPSS [At1g09812.1]
A_84_P200714	TREATMENT	90 min col-0 treatment	45 min col-0 control	0.4072	0.05177	15	-7.87	1.06e-06	0.000379071		At5g10580.1	At5g10580.1	expressed protein contains Pfam profile PF04654: Protein of unknown function, DUF599 [At5g10580.1]
A_84_P10496	TREATMENT	90 min col-0 treatment	45 min col-0 control	0.9299	0.1182	15	-7.87	1.06e-06	0.000379071		At1g22400.1	At1g22400.1	UDP-glucoronosyl/UDP-glucosyl transferase family protein contains Pfam profile: PF00201 UDP-glucoronosyl and UDP-glucosyl transferase [At1g22400.1]
A_84_P21308	TREATMENT	90 min col-0 treatment	45 min col-0 control	-1.53	0.1952	15	7.84	1.11e-06	0.000385174		At1g21550.1	At1g21550.1	calcium-binding protein, putative contains similarity to calcium-binding protein GB:CAB63264 GI:6580549 from [Lotus japonicus] [At1g21550.1]
A_84_P199724	TREATMENT	90 min col-0 treatment	45 min col-0 control	-1.1272	0.1441	15	7.82	1.14e-06	0.000391139		At5g43630.1	At5g43630.1	zinc knuckle (CCHC-type) family protein contains Pfam domain PF00098: Zinc knuckle [At5g43630.1]
A_84_P130146	TREATMENT	90 min col-0 treatment	45 min col-0 control	-0.6044	0.07739	15	7.81	1.16e-06	0.000393579		At2g34070.1	At2g34070.1	expressed protein [At2g34070.1]
A_84_P13187	TREATMENT	90 min col-0 treatment	45 min col-0 control	-0.6381	0.08221	15	7.76	1.25e-06	0.000418214		At5g20410.1	At5g20410.1	1,2-diacylglycerol 3-beta-galactosyltransferase, putative / monogalactosyldiacylglycerol synthase, putative / MGDG synthase, putative identical to monogalactosyldiacylglycerol synthase [gi:3367638] from Arabidopsis thaliana, similar to MGDG synthase...
A_84_P14807	TREATMENT	90 min col-0 treatment	45 min col-0 control	-0.457	0.05892	15	7.76	1.26e-06	0.000418214		At4g29900.1	At4g29900.1	calcium-transporting ATPase, plasma membrane-type, putative / Ca2+-ATPase, putative (ACA10) identical to SP|Q9SZR1 Potential calcium-transporting ATPase 10, plasma membrane-type (EC 3.6.3.8) (Ca(2+)-ATPase isoform 10) {Arabidopsis thaliana}; similar...
A_84_P17994	TREATMENT	90 min col-0 treatment	45 min col-0 control	-0.7159	0.09253	15	7.74	1.3e-06	0.000426851		At1g23030.1	At1g23030.1	armadillo/beta-catenin repeat family protein / U-box domain-containing protein contains Pfam domain, PF00514: Armadillo/beta-catenin-like repeats and Pfam, PF04564: U-box domain [At1g23030.1]
A_84_P117182	TREATMENT	90 min col-0 treatment	45 min col-0 control	-1.0756	0.1401	15	7.68	1.42e-06	0.000459652		At3g05890.1	At3g05890.1	hydrophobic protein (RCI2B) / low temperature and salt responsive protein (LTI6B) identical to SP|Q9ZNS6 Hydrophobic protein RCI2B (Low temperature and salt responsive protein LTI6B) {Arabidopsis thaliana} [At3g05890.1]
A_84_P22817	TREATMENT	90 min col-0 treatment	45 min col-0 control	-1.0437	0.136	15	7.68	1.43e-06	0.000459652		At1g66460.1	At1g66460.1	protein kinase family protein contains Pfam profile: PF00069: Eukaryotic protein kinase domain [At1g66460.1]
A_84_P11645	TREATMENT	90 min col-0 treatment	45 min col-0 control	-0.8702	0.1137	15	7.65	1.48e-06	0.000470768		At2g38170.1	At2g38170.1	calcium exchanger (CAX1) identical to high affinity calcium antiporter CAX1 [Arabidopsis thaliana] gi|9256741|gb|AAB05913, except a possible frameshift at base 58008. Sequence has been confirmed with 5 sequencing reads.; Ca2+:Cation Antiporter (CaCA)...
A_84_P561605	TREATMENT	90 min col-0 treatment	45 min col-0 control	-0.7378	0.09667	15	7.63	1.53e-06	0.000481655		At3g15115.1	At3g15115.1	expressed protein [At3g15115.1]
A_84_P23019	TREATMENT	90 min col-0 treatment	45 min col-0 control	0.7363	0.09664	15	-7.62	1.56e-06	0.000486088		At2g24400.1	At2g24400.1	auxin-responsive protein, putative / small auxin up RNA (SAUR_D) similar to SAUR-AC-like protein (small auxin up RNA) (GI:4455308) from [Arabidopsis thaliana]; auxin-induced protein TGSAUR22 (GI:10185820) [Tulipa gesnerian] [At2g24400.1]
A_84_P706218	TREATMENT	90 min col-0 treatment	45 min col-0 control	-1.4035	0.1847	15	7.6	1.62e-06	0.000499685		CHR1:021477192-021477133	CHR1:021477192-021477133	Unknown
A_84_P109962	TREATMENT	90 min col-0 treatment	45 min col-0 control	-2.0783	0.2746	15	7.57	1.7e-06	0.000508938		At1g21240.1	At1g21240.1	wall-associated kinase, putative similar to wall-associated kinase 1 [Arabidopsis thaliana] GI:3549626; expressed in leaves and stems & induced by salicylic acid or INA (PMID:10380805) [At1g21240.1]
A_84_P21150	TREATMENT	90 min col-0 treatment	45 min col-0 control	-1.2314	0.1627	15	7.57	1.69e-06	0.000508938		At3g01760.1	At3g01760.1	lysine and histidine specific transporter, putative similar to lysine and histidine specific transporter [Arabidopsis thaliana] GI:2576361; contains Pfam profile PF01490: Transmembrane amino acid transporter protein [At3g01760.1]
A_84_P22728	TREATMENT	90 min col-0 treatment	45 min col-0 control	-0.9796	0.1293	15	7.57	1.68e-06	0.000508938		At1g09750.1	At1g09750.1	chloroplast nucleoid DNA-binding protein-related contains Pfam profile PF00026: Eukaryotic aspartyl protease;b similar to CND41, chloroplast nucleoid DNA binding protein (GI:2541876) [Nicotiana tabacum] [At1g09750.1]
A_84_P14064	TREATMENT	90 min col-0 treatment	45 min col-0 control	-1.0825	0.1435	15	7.55	1.76e-06	0.000511846		At5g54030.1	At5g54030.1	DC1 domain-containing protein contains Pfam profile PF03107: DC1 domain [At5g54030.1]
A_84_P11330	TREATMENT	90 min col-0 treatment	45 min col-0 control	-0.6994	0.09267	15	7.55	1.75e-06	0.000511846		At1g11545.1	At1g11545.1	xyloglucan:xyloglucosyl transferase, putative / xyloglucan endotransglycosylase, putative / endo-xyloglucan transferase, putative similar to endo-xyloglucan transferase GI:2244732 from [Gossypium hirsutum] [At1g11545.1]
A_84_P297454	TREATMENT	90 min col-0 treatment	45 min col-0 control	0.5063	0.06712	15	-7.54	1.76e-06	0.000511846		At4g27870.1	At4g27870.1	integral membrane family protein contains Pfam PF01988: Integral membrane protein [At4g27870.1]
A_84_P281740	TREATMENT	90 min col-0 treatment	45 min col-0 control	-0.9276	0.1234	15	7.51	1.85e-06	0.000527964		At1g78070.1	At1g78070.1	WD-40 repeat family protein contains Pfam profile PF00400: WD domain, G-beta repeat [At1g78070.1]
A_84_P193504	TREATMENT	90 min col-0 treatment	45 min col-0 control	-0.3626	0.04823	15	7.52	1.84e-06	0.000527964		At1g32090.1	At1g32090.1	early-responsive to dehydration protein-related / ERD protein-related similar to ERD4 protein (early-responsive to dehydration stress) [Arabidopsis thaliana] GI:15375406; contains Pfam profile PF02714: Domain of unknown function DUF221 [At1g32090.1]
A_84_P167393	TREATMENT	90 min col-0 treatment	45 min col-0 control	0.5328	0.07151	15	-7.45	2.04e-06	0.000576797		At5g42630.1	At5g42630.1	myb family transcription factor (KAN4) contains Pfam profile: PF00249 myb-like DNA-binding domain; identical to cDNA GARP-like putative transcription factor KANADI4 (KAN4) GI:15723592 [At5g42630.1]
A_84_P13919	TREATMENT	90 min col-0 treatment	45 min col-0 control	0.425	0.05724	15	-7.42	2.13e-06	0.000596718		At4g37250.1	At4g37250.1	leucine-rich repeat family protein / protein kinase family protein contains protein kinase domain, Pfam:PF00069; contains leucine-rich repeats, Pfam:PF00560 [At4g37250.1]
A_84_P20934	TREATMENT	90 min col-0 treatment	45 min col-0 control	0.2823	0.03808	15	-7.41	2.17e-06	0.000602398		At1g04950.1	At1g04950.1	TATA box-binding protein-associated factor (TAF) family protein contains Pfam profile: PF02969 TATA box binding protein associated factor [At1g04950.1]
A_84_P272130	TREATMENT	90 min col-0 treatment	45 min col-0 control	-1.343	0.1815	15	7.4	2.21e-06	0.000607975		At2g04680.1	At2g04680.1	DC1 domain-containing protein contains Pfam profile PF03107: DC1 domain [At2g04680.1]
A_84_P110522	TREATMENT	90 min col-0 treatment	45 min col-0 control	0.4647	0.06299	15	-7.38	2.3e-06	0.000624237		At3g06080.1	At3g06080.1	expressed protein identical to unknown protein GB:AAF30301 from [Arabidopsis thaliana] [At3g06080.1]
A_84_P66214	TREATMENT	90 min col-0 treatment	45 min col-0 control	1.6713	0.2266	15	-7.38	2.31e-06	0.000624237		At3g02840.1	At3g02840.1	immediate-early fungal elicitor family protein similar to immediate-early fungal elicitor protein CMPG1 (GI:14582200) [Petroselinum crispum] [At3g02840.1]
A_84_P16372	TREATMENT	90 min col-0 treatment	45 min col-0 control	-1.8011	0.2453	15	7.34	2.44e-06	0.0006479		NP454743	NP454743	putative replication protein A1 [Arabidopsis thaliana] [NP454743]
A_84_P10932	TREATMENT	90 min col-0 treatment	45 min col-0 control	-0.8468	0.1153	15	7.35	2.42e-06	0.0006479		At4g00430.1	At4g00430.1	plasma membrane intrinsic protein, putative identical to transmembrane protein GI:535780 from [Arabidopsis thaliana]; very strong similarity to SP|Q08733 Plasma membrane intrinsic protein 1C (Transmembrane protein B) (TMP-B) {Arabidopsis thaliana};...
A_84_P11816	TREATMENT	90 min col-0 treatment	45 min col-0 control	-0.9068	0.1239	15	7.32	2.54e-06	0.000662925		At3g50120.1	At3g50120.1	expressed protein contains Pfam profile PF03140: Plant protein of unknown function; expression supported by MPSS [At3g50120.1]
A_84_P24028	TREATMENT	90 min col-0 treatment	45 min col-0 control	-0.74	0.1011	15	7.32	2.53e-06	0.000662925		At3g16240.1	At3g16240.1	delta tonoplast integral protein (delta-TIP) identical to delta tonoplast integral protein (delta-TIP) (GI:9279707)(GB:U39485) [Arabidopsis thaliana] (Plant Cell 8 (4), 587-599 (1996)) [At3g16240.1]
A_84_P16226	TREATMENT	90 min col-0 treatment	45 min col-0 control	1.705	0.2337	15	-7.3	2.63e-06	0.000680597		At1g14540.1	At1g14540.1	anionic peroxidase, putative similar to lignin forming anionic peroxidase [Nicotiana sylvestris] SWISS-PROT: Q02200 [At1g14540.1]
A_84_P274250	TREATMENT	90 min col-0 treatment	45 min col-0 control	-0.6525	0.0897	15	7.27	2.72e-06	0.000697972		At1g55390.1	At1g55390.1	DC1 domain-containing protein similar to hypothetical protein GI:4204272 from [Arabidopsis thaliana] contains weak PHD zinc finger motifs contains weak PHD zinc finger motifs DC1 domain, a divergent protein kinase C domain of unknown function....
A_84_P724092	TREATMENT	90 min col-0 treatment	45 min col-0 control	0.6006	0.08263	15	-7.27	2.75e-06	0.00069979		TC262311	TC262311	AY090314 At1g58243/At1g58243 {Arabidopsis thaliana;} , complete [TC262311]
A_84_P14733	TREATMENT	90 min col-0 treatment	45 min col-0 control	-1.3199	0.1819	15	7.26	2.81e-06	0.000702583		At1g06040.1	At1g06040.1	zinc finger (B-box type) family protein / salt-tolerance protein (STO) identical to SP|Q96288 Salt-tolerance protein [Arabidopsis thaliana]; contains Pfam profile PF00643: B-box zinc finger [At1g06040.1]
A_84_P16570	TREATMENT	90 min col-0 treatment	45 min col-0 control	-0.6428	0.08865	15	7.25	2.83e-06	0.000702583		At3g56230.1	At3g56230.1	speckle-type POZ protein-related contains Pfam PF00651 : BTB/POZ domain; similar to Speckle-type POZ protein (SP:O43791) [Homo sapiens] [At3g56230.1]
A_84_P22847	TREATMENT	90 min col-0 treatment	45 min col-0 control	1.9098	0.2631	15	-7.26	2.8e-06	0.000702583		At1g14550.1	At1g14550.1	anionic peroxidase, putative similar to anionic peroxidase GI:170202 from (Nicotiana sylvestris) [At1g14550.1]
A_84_P594418	TREATMENT	90 min col-0 treatment	45 min col-0 control	2.0763	0.2881	15	-7.21	3.04e-06	0.000748632		At2g17660.1	At2g17660.1	nitrate-responsive NOI protein, putative similar to nitrate-induced NOI protein [Zea mays] GI:2642213 [At2g17660.1]
A_84_P78679	TREATMENT	90 min col-0 treatment	45 min col-0 control	0.5274	0.07348	15	-7.18	3.19e-06	0.000779286		At5g13880.1	At5g13880.1	expressed protein [At5g13880.1]
A_84_P20386	TREATMENT	90 min col-0 treatment	45 min col-0 control	-1.1699	0.1633	15	7.17	3.25e-06	0.000787642		At3g51860.1	At3g51860.1	cation exchanger, putative (CAX3) similar to high affinity calcium antiporter CAX1 [Arabidopsis thaliana] gi|9256741|gb|AAB05913; Ca2+:Cation Antiporter (CaCA) Family member PMID:11500563; non-consensus AT-acceptor splice site at intron 1 [At3g51860.1]
A_84_P279060	TREATMENT	90 min col-0 treatment	45 min col-0 control	-1.0723	0.1503	15	7.13	3.43e-06	0.00082472		At3g12320.1	At3g12320.1	expressed protein [At3g12320.1]
A_84_P298034	TREATMENT	90 min col-0 treatment	45 min col-0 control	-0.8737	0.123	15	7.11	3.59e-06	0.000852667		At1g08500.1	At1g08500.1	plastocyanin-like domain-containing protein [At1g08500.1]
A_84_P193494	TREATMENT	90 min col-0 treatment	45 min col-0 control	-0.4915	0.06921	15	7.1	3.62e-06	0.000852667		At3g52920.1	At3g52920.1	expressed protein weak similarity to enterophilin-2L [Cavia porcellus] GI:12718845; contains Pfam profile PF04949: Family of unknown function (DUF662) [At3g52920.1]
A_84_P23570	TREATMENT	90 min col-0 treatment	45 min col-0 control	2.0927	0.2948	15	-7.1	3.63e-06	0.000852667		At5g65800.1	At5g65800.1	1-aminocyclopropane-1-carboxylate synthase, putative / ACC synthase, putative similar to ACC synthases from Arabidopsis thaliana [GI:940370], Lycopersicon esculentum [GI:508609], Cucumis sativus [GI:3641649] [At5g65800.1]
A_84_P612186	TREATMENT	90 min col-0 treatment	45 min col-0 control	-0.9025	0.1273	15	7.09	3.7e-06	0.000858255		At2g03370.1	At2g03370.1	hypothetical protein contains Pfam profile PF04577: Protein of unknown function (DUF563) [At2g03370.1]
A_84_P17267	TREATMENT	90 min col-0 treatment	45 min col-0 control	-0.8093	0.1142	15	7.09	3.71e-06	0.000858255		At2g41410.1	At2g41410.1	calmodulin, putative identical to SP|P30188 Calmodulin-like protein {Arabidopsis thaliana} [At2g41410.1]
A_84_P13979	TREATMENT	90 min col-0 treatment	45 min col-0 control	0.2561	0.03616	15	-7.08	3.74e-06	0.00085869		At1g23400.1	At1g23400.1	expressed protein [At1g23400.1]
A_84_P17866	TREATMENT	90 min col-0 treatment	45 min col-0 control	-1.5294	0.2175	15	7.03	4.06e-06	0.000925204		At1g01680.1	At1g01680.1	U-box domain-containing protein [At1g01680.1]
A_84_P570360	TREATMENT	90 min col-0 treatment	45 min col-0 control	2.3526	0.335	15	-7.02	4.13e-06	0.000934184		At2g22750.1	At2g22750.1	basic helix-loop-helix (bHLH) family protein contains Pfam profile: PF00010 helix-loop-helix DNA-binding domain [At2g22750.1]
A_84_P15504	TREATMENT	90 min col-0 treatment	45 min col-0 control	-0.7491	0.107	15	7	4.27e-06	0.000947067		At3g15990.1	At3g15990.1	sulfate transporter, putative similar to sulfate transporter [Arabidopsis thaliana] GI:2285885; contains Pfam profiles PF00916: Sulfate transporter family, PF01740: STAS domain [At3g15990.1]
A_84_P23997	TREATMENT	90 min col-0 treatment	45 min col-0 control	-0.5702	0.08145	15	7	4.28e-06	0.000947067		At3g04060.1	At3g04060.1	no apical meristem (NAM) family protein contains Pfam PF02365 : No apical meristem (NAM) protein; similar to cup-shaped cotyledon CUC2 (GI:1944132) [Arabidopsis thaliana] [At3g04060.1]
A_84_P22290	TREATMENT	90 min col-0 treatment	45 min col-0 control	-0.5202	0.07425	15	7.01	4.24e-06	0.000947067		At4g03210.1	At4g03210.1	xyloglucan:xyloglucosyl transferase, putative / xyloglucan endotransglycosylase, putative / endo-xyloglucan transferase, putative contains similarity to xyloglucan endo-transglycosylase-like protein (XET-1) GI:5070246 from [Medicago truncatula]...
A_84_P18847	TREATMENT	90 min col-0 treatment	45 min col-0 control	-1.3996	0.2005	15	6.98	4.42e-06	0.00097101		At5g67430.1	At5g67430.1	GCN5-related N-acetyltransferase (GNAT) family protein contains Pfam profile PF00583: acetyltransferase, GNAT family [At5g67430.1]
A_84_P13507	TREATMENT	90 min col-0 treatment	45 min col-0 control	0.4637	0.06654	15	-6.97	4.52e-06	0.000985886		At2g02230.1	At2g02230.1	F-box family protein / SKP1 interacting partner 3-related contains similarity to SKP1 interacting partner 3 GI:10716951 from [Arabidopsis thaliana] [At2g02230.1]
A_84_P16403	TREATMENT	90 min col-0 treatment	45 min col-0 control	-0.3287	0.04721	15	6.96	4.57e-06	0.000987053		At2g27360.1	At2g27360.1	lipase, putative similar to lipase [Arabidopsis thaliana] GI:1145627; contains Pfam profile PF00657: Lipase/Acylhydrolase with GDSL-like motif [At2g27360.1]
A_84_P76134	TREATMENT	90 min col-0 treatment	45 min col-0 control	0.6381	0.09171	15	-6.96	4.59e-06	0.000987053		At4g14270.1	At4g14270.1	expressed protein [At4g14270.1]
A_84_P14647	TREATMENT	90 min col-0 treatment	45 min col-0 control	2.2821	0.3284	15	-6.95	4.67e-06	0.000997234		NP034558	NP034558	Similar to gb|X98322 peroxidase (prxr10) from Arabidopsis thaliana. [NP034558]
A_84_P23528	TREATMENT	90 min col-0 treatment	45 min col-0 control	0.3314	0.04775	15	-6.94	4.73e-06	0.00100303		At5g55700.1	At5g55700.1	glycosyl hydrolase family 14 protein similar to beta-amylase enzyme GI:6065749 from [Arabidopsis thaliana]; contains Pfam profile PF01373: Glycosyl hydrolase family 14 [At5g55700.1]
A_84_P186864	TREATMENT	90 min col-0 treatment	45 min col-0 control	-0.6657	0.09631	15	6.91	4.96e-06	0.00104367		At5g03960.1	At5g03960.1	calmodulin-binding family protein [At5g03960.1]
A_84_P21040	TREATMENT	90 min col-0 treatment	45 min col-0 control	2.2158	0.3207	15	-6.91	4.99e-06	0.00104367		At2g22750.1	At2g22750.1	basic helix-loop-helix (bHLH) family protein contains Pfam profile: PF00010 helix-loop-helix DNA-binding domain [At2g22750.1]
A_84_P171003	TREATMENT	90 min col-0 treatment	45 min col-0 control	0.3314	0.04801	15	-6.9	5.05e-06	0.00104904		At2g36000.1	At2g36000.1	mitochondrial transcription termination factor-related / mTERF-related contains Pfam profile PF02536: mTERF [At2g36000.1]
A_84_P172221	TREATMENT	90 min col-0 treatment	45 min col-0 control	0.8171	0.1186	15	-6.89	5.14e-06	0.00106052		At4g27860.1	At4g27860.1	integral membrane family protein contains Pfam PF01988: Integral membrane protein [At4g27860.1]
A_84_P21409	TREATMENT	90 min col-0 treatment	45 min col-0 control	0.6904	0.1004	15	-6.88	5.25e-06	0.00107081		At4g25700.1	At4g25700.1	beta-carotene hydroxylase identical to GI:1575296 [At4g25700.1]
A_84_P21158	TREATMENT	90 min col-0 treatment	45 min col-0 control	0.7024	0.1021	15	-6.88	5.26e-06	0.00107081		At3g04550.1	At3g04550.1	expressed protein [At3g04550.1]
A_84_P13634	TREATMENT	90 min col-0 treatment	45 min col-0 control	0.8792	0.1281	15	-6.86	5.37e-06	0.00108596		At3g23080.1	At3g23080.1	expressed protein weak similarity to SP|Q9UKL6 Phosphatidylcholine transfer protein (PC-TP) {Homo sapiens} [At3g23080.1]
A_84_P19241	TREATMENT	90 min col-0 treatment	45 min col-0 control	-1.1136	0.1624	15	6.86	5.42e-06	0.00108886		At2g46830.1	At2g46830.1	myb-related transcription factor (CCA1) identical to myb-related transcription factor (CCA1) GI:4090569 from [Arabidopsis thaliana] [At2g46830.1]
A_84_P11807	TREATMENT	90 min col-0 treatment	45 min col-0 control	0.6002	0.08783	15	-6.83	5.67e-06	0.00113164		At3g47800.1	At3g47800.1	aldose 1-epimerase family protein similar to ALDOSE 1-EPIMERASE PRECURSOR GB:P05149 [SP|P05149] from [Acinetobacter calcoaceticus]; contains Pfam profile PF01263 Aldose 1-epimerase [At3g47800.1]
A_84_P722438	TREATMENT	90 min col-0 treatment	45 min col-0 control	0.6609	0.09682	15	-6.83	5.74e-06	0.00113477		CHR2:009693075-009693016	CHR2:009693075-009693016	Unknown
A_84_P164883	TREATMENT	90 min col-0 treatment	45 min col-0 control	1.0928	0.1601	15	-6.82	5.76e-06	0.00113477		At5g42900.1	At5g42900.1	expressed protein similar to unknown protein (pir||T05226) [At5g42900.1]
A_84_P12357	TREATMENT	90 min col-0 treatment	45 min col-0 control	-1.0963	0.1615	15	6.79	6.13e-06	0.00117374		At1g10480.1	At1g10480.1	zinc finger (C2H2 type) family protein contains Pfam profile: PF00096 zinc finger, C2H2 type [At1g10480.1]
A_84_P12484	TREATMENT	90 min col-0 treatment	45 min col-0 control	-0.6884	0.1015	15	6.78	6.15e-06	0.00117374		At1g58170.1	At1g58170.1	disease resistance-responsive protein-related / dirigent protein-related similar to dirigent protein [Thuja plicata] gi|6694699|gb|AAF25360; similar to pathogenesis-related protein [Pisum sativum] gi|4585273|gb|AAD25355 [At1g58170.1]
A_84_P19769	TREATMENT	90 min col-0 treatment	45 min col-0 control	-0.6428	0.09472	15	6.79	6.13e-06	0.00117374		At5g61570.1	At5g61570.1	protein kinase family protein contains protein kinase domain, Pfam:PF00069 [At5g61570.1]
A_84_P180484	TREATMENT	90 min col-0 treatment	45 min col-0 control	-0.573	0.08446	15	6.79	6.15e-06	0.00117374		At2g33570.1	At2g33570.1	expressed protein [At2g33570.1]
A_84_P19781	TREATMENT	90 min col-0 treatment	45 min col-0 control	0.6391	0.09418	15	-6.79	6.14e-06	0.00117374		At5g64410.1	At5g64410.1	oligopeptide transporter OPT family protein similar to SP|P40900 Sexual differentiation process protein isp4 {Schizosaccharomyces pombe}; contains Pfam profile PF03169: OPT oligopeptide transporter protein [At5g64410.1]
A_84_P14556	TREATMENT	90 min col-0 treatment	45 min col-0 control	0.7357	0.1085	15	-6.78	6.21e-06	0.00117783		At3g15540.1	At3g15540.1	auxin-responsive protein / indoleacetic acid-induced protein 19 (IAA19) identical to SP|O24409 Auxin-responsive protein IAA19 (Indoleacetic acid-induced protein 19) {Arabidopsis thaliana} [At3g15540.1]
A_84_P10201	TREATMENT	90 min col-0 treatment	45 min col-0 control	-0.7331	0.1083	15	6.77	6.34e-06	0.0011896		At5g23750.1	At5g23750.1	remorin family protein contains Pfam domain, PF03766: Remorin, N-terminal region; contains Pfam domain, PF03763: Remorin, C-terminal region [At5g23750.1]
A_84_P244235	TREATMENT	90 min col-0 treatment	45 min col-0 control	0.9804	0.1449	15	-6.77	6.35e-06	0.0011896		At3g20810.1	At3g20810.1	transcription factor jumonji (jmjC) domain-containing protein contains Pfam domain PF02373: jmjC domain [At3g20810.1]
A_84_P16449	TREATMENT	90 min col-0 treatment	45 min col-0 control	-1.8485	0.2735	15	6.76	6.44e-06	0.00119911		At3g22840.1	At3g22840.1	chlorophyll A-B binding family protein / early light-induced protein (ELIP) identical to early light-induced protein; ELIP [Arabidopsis thaliana] GI:1872544; contains Pfam profile: PF00504 chlorophyll A-B binding protein; identical to cDNA early...
A_84_P587696	TREATMENT	90 min col-0 treatment	45 min col-0 control	-0.6522	0.09663	15	6.75	6.53e-06	0.0012085		At5g03510.1	At5g03510.1	zinc finger (C2H2 type) family protein contains Pfam domain, PF00096: Zinc finger, C2H2 type [At5g03510.1]
A_84_P510552	TREATMENT	90 min col-0 treatment	45 min col-0 control	0.3805	0.05642	15	-6.74	6.58e-06	0.00121041		At5g41100.1	At5g41100.1	expressed protein [At5g41100.1]
A_84_P17406	TREATMENT	90 min col-0 treatment	45 min col-0 control	-0.3502	0.05206	15	6.73	6.8e-06	0.00124339		At3g21220.1	At3g21220.1	mitogen-activated protein kinase kinase (MAPKK), putative (MKK5) identical to GB:BAA28831 from [Arabidopsis thaliana]; mitogen-activated protein kinase kinase (MAPKK) family, PMID:12119167 [At3g21220.1]
A_84_P194234	TREATMENT	90 min col-0 treatment	45 min col-0 control	-0.6269	0.0935	15	6.7	7.05e-06	0.00128143		At1g33800.1	At1g33800.1	expressed protein contains Pfam profile PF04669: Protein of unknown function (DUF579) [At1g33800.1]
A_84_P565111	TREATMENT	90 min col-0 treatment	45 min col-0 control	-0.7637	0.1141	15	6.69	7.19e-06	0.00129915		At3g05900.1	At3g05900.1	neurofilament protein-related similar to NF-180 (GI:632549) [Petromyzon marinus] similar to Neurofilament triplet H protein (200 kDa neurofilament protein) (Neurofilament heavy polypeptide) (NF-H) (Swiss-Prot:P12036) [Homo sapiens] [At3g05900.1]
A_84_P23572	TREATMENT	90 min col-0 treatment	45 min col-0 control	-0.5954	0.08953	15	6.65	7.74e-06	0.0013903		At5g66280.1	At5g66280.1	GDP-D-mannose 4,6-dehydratase, putative strong similarity to GDP-D-mannose-4,6-dehydratase [Arabidopsis thaliana] GI:1764100 [At5g66280.1]
A_84_P18985	TREATMENT	90 min col-0 treatment	45 min col-0 control	-0.6595	0.09928	15	6.64	7.83e-06	0.00139824		At1g11740.1	At1g11740.1	ankyrin repeat family protein contains ankyrin repeats, Pfam domain PF00023 [At1g11740.1]
A_84_P173241	TREATMENT	90 min col-0 treatment	45 min col-0 control	0.3016	0.04543	15	-6.64	7.89e-06	0.00140076		At4g34340.1	At4g34340.1	expressed protein [At4g34340.1]
A_84_P711376	TREATMENT	90 min col-0 treatment	45 min col-0 control	-0.8732	0.1317	15	6.63	8.02e-06	0.00141099		CHR1:022853595-022853654	CHR1:022853595-022853654	Unknown
A_84_P539348	TREATMENT	90 min col-0 treatment	45 min col-0 control	0.8675	0.1309	15	-6.63	8.04e-06	0.00141099		At2g25735.1	At2g25735.1	expressed protein [At2g25735.1]
A_84_P506289	TREATMENT	90 min col-0 treatment	45 min col-0 control	-0.9856	0.149	15	6.62	8.22e-06	0.00143433		At1g16530.1	At1g16530.1	LOB domain protein 3 / lateral organ boundaries domain protein 3 (LBD3) identical to SP|Q9SA51 LOB domain protein 3 {Arabidopsis thaliana}; identical to ASYMMETRIC LEAVES2-like protein 9 [Arabidopsis thaliana] GI:19918989 [At1g16530.1]
A_84_P164953	TREATMENT	90 min col-0 treatment	45 min col-0 control	0.7651	0.116	15	-6.59	8.53e-06	0.00147997		At1g49720.1	At1g49720.1	ABA-responsive element-binding protein / abscisic acid responsive elements-binding factor (ABRE) identical to abscisic acid responsive elements-binding factor GB:AAF27179 GI:6739274 from [Arabidopsis thaliana]; identical to cDNA abscisic acid...
A_84_P10863	TREATMENT	90 min col-0 treatment	45 min col-0 control	-0.8716	0.1324	15	6.58	8.7e-06	0.00150094		At3g48520.1	At3g48520.1	cytochrome P450 family protein similar to Cytochrome P450 94A1 (P450-dependent fatty acid omega-hydroxylase) (SP:O81117) {Vicia sativa}; contains Pfam profile: PF00067 cytochrome P450 [At3g48520.1]
A_84_P711769	TREATMENT	90 min col-0 treatment	45 min col-0 control	-1.0362	0.1575	15	6.58	8.75e-06	0.00150108		CHR1:001480483-001480424	CHR1:001480483-001480424	Unknown
A_84_P126821	TREATMENT	90 min col-0 treatment	45 min col-0 control	-1.2221	0.1859	15	6.57	8.81e-06	0.00150293		At2g46790.1	At2g46790.1	pseudo-response regulator 9 (APRR9) / timing of CAB expression 1-like protein (TL1) identical to pseudo-response regulator 9 GI:10281000 from [Arabidopsis thaliana], timing of CAB expression 1-like protein [Arabidopsis thaliana] GI:9247022; contains...
A_84_P516656	TREATMENT	90 min col-0 treatment	45 min col-0 control	0.6158	0.09381	15	-6.56	8.96e-06	0.00151163		At4g35985.1	At4g35985.1	senescence/dehydration-associated protein-related similar to senescence-associated protein 12 [Hemerocallis hybrid cultivar] gi|3551958|gb|AAC34857; similar to early-responsive to dehydration stress ERD7 protein [Arabidopsis thaliana]...
A_84_P13987	TREATMENT	90 min col-0 treatment	45 min col-0 control	1.7777	0.2707	15	-6.57	8.93e-06	0.00151163		At5g25190.1	At5g25190.1	ethylene-responsive element-binding protein, putative ethylene responsive element binding protein homolog, Stylosanthes hamata, EMBL:U91857 [At5g25190.1]
A_84_P573322	TREATMENT	90 min col-0 treatment	45 min col-0 control	0.4735	0.07218	15	-6.56	9.05e-06	0.00151513		At4g05070.1	At4g05070.1	expressed protein [At4g05070.1]
A_84_P18051	TREATMENT	90 min col-0 treatment	45 min col-0 control	1.462	0.223	15	-6.56	9.08e-06	0.00151513		At1g47610.1	At1g47610.1	transducin family protein / WD-40 repeat family protein contains 7 WD-40 repeats (PF00400); similar to En/Spm-like transposon protein (GI:2739374) [Arabidopsis thaliana] [At1g47610.1]
A_84_P12332	TREATMENT	90 min col-0 treatment	45 min col-0 control	0.3768	0.05754	15	-6.55	9.21e-06	0.00152847		At1g05220.1	At1g05220.1	expressed protein ; expression supported by MPSS [At1g05220.1]
A_84_P20585	TREATMENT	90 min col-0 treatment	45 min col-0 control	-0.232	0.0355	15	6.54	9.43e-06	0.00155653		At5g14310.1	At5g14310.1	expressed protein low similarity to PrMC3 [Pinus radiata] GI:5487873 [At5g14310.1]
A_84_P11661	TREATMENT	90 min col-0 treatment	45 min col-0 control	-1.0014	0.1534	15	6.53	9.55e-06	0.00156786		At2g18980.1	At2g18980.1	peroxidase, putative identical to peroxidase ATP22a [Arabidopsis thaliana] gi|1620369|emb|CAA70034 [At2g18980.1]
A_84_P17617	TREATMENT	90 min col-0 treatment	45 min col-0 control	0.4833	0.07428	15	-6.51	9.93e-06	0.00162153		At4g23840.1	At4g23840.1	leucine-rich repeat family protein [At4g23840.1]
A_84_P16823	TREATMENT	90 min col-0 treatment	45 min col-0 control	-1.2035	0.1856	15	6.49	1.03e-05	0.00165539		At1g01060.1	At1g01060.1	myb family transcription factor contains Pfam profile: PF00249 myb-like DNA-binding domain; identical to cDNA LATE ELONGATED HYPOCOTYL MYB transcription factor GI:3281845 [At1g01060.1]
A_84_P552996	TREATMENT	90 min col-0 treatment	45 min col-0 control	0.2599	0.04007	15	-6.49	1.03e-05	0.00165539		At5g02010.1	At5g02010.1	expressed protein contains Pfam profile PF03759: Domain of unknown function (DUF315) [At5g02010.1]
A_84_P20649	TREATMENT	90 min col-0 treatment	45 min col-0 control	0.5476	0.08444	15	-6.48	1.03e-05	0.00165539		At5g44350.1	At5g44350.1	ethylene-responsive nuclear protein -related contains weak similarity to ethylene-regulated nuclear protein ERT2 [Arabidopsis thaliana] gi|2765442|emb|CAA75349 [At5g44350.1]
A_84_P517322	TREATMENT	90 min col-0 treatment	45 min col-0 control	0.842	0.13	15	-6.48	1.04e-05	0.00166271		At3g19200.1	At3g19200.1	hypothetical protein [At3g19200.1]
A_84_P607390	TREATMENT	90 min col-0 treatment	45 min col-0 control	-0.7831	0.1215	15	6.45	1.1e-05	0.00174041		At5g46470.1	At5g46470.1	disease resistance protein (TIR-NBS-LRR class), putative domain signature TIR-NBS-LRR exists, suggestive of a disease resistance protein. [At5g46470.1]
A_84_P612892	TREATMENT	90 min col-0 treatment	45 min col-0 control	0.6748	0.1047	15	-6.45	1.1e-05	0.00174041		At1g17665.1	At1g17665.1	expressed protein [At1g17665.1]
A_84_P23208	TREATMENT	90 min col-0 treatment	45 min col-0 control	-1.7102	0.2658	15	6.44	1.12e-05	0.00176292		At3g60420.1	At3g60420.1	expressed protein [At3g60420.1]
A_84_P703970	TREATMENT	90 min col-0 treatment	45 min col-0 control	-0.7716	0.12	15	6.43	1.13e-05	0.00176954		At4g29900.1	At4g29900.1	calcium-transporting ATPase, plasma membrane-type, putative / Ca2+-ATPase, putative (ACA10) identical to SP|Q9SZR1 Potential calcium-transporting ATPase 10, plasma membrane-type (EC 3.6.3.8) (Ca(2+)-ATPase isoform 10) {Arabidopsis thaliana}; similar...
A_84_P184854	TREATMENT	90 min col-0 treatment	45 min col-0 control	0.371	0.05771	15	-6.43	1.14e-05	0.00177609		At1g53200.1	At1g53200.1	expressed protein [At1g53200.1]
A_84_P612667	TREATMENT	90 min col-0 treatment	45 min col-0 control	0.2603	0.04055	15	-6.42	1.16e-05	0.00179808		At5g19030.3	At5g19030.3	RNA recognition motif (RRM)-containing protein low similarity to Cold-inducible RNA-binding protein (Glycine-rich RNA-binding protein CIRP) from {Homo sapiens} SP|Q14011, {Rattus norvegicus} SP|Q61413,{Xenopus laevis} SP|O93235; contains InterPro...
A_84_P11501	TREATMENT	90 min col-0 treatment	45 min col-0 control	-1.575	0.2464	15	6.39	1.21e-05	0.00181122		At1g53680.1	At1g53680.1	glutathione S-transferase, putative similar to GI:2853219 from [Carica papaya] [At1g53680.1]
A_84_P263610	TREATMENT	90 min col-0 treatment	45 min col-0 control	-0.8904	0.1391	15	6.4	1.2e-05	0.00181122		At4g14380.1	At4g14380.1	expressed protein [At4g14380.1]
A_84_P10114	TREATMENT	90 min col-0 treatment	45 min col-0 control	-0.6844	0.107	15	6.4	1.2e-05	0.00181122		At4g38400.1	At4g38400.1	expansin family protein (EXPL2) contains Pfam profile: PF01357 pollen allergen; expansin-like gene, PMID:11641069, www.bio.psu.edu/expansins [At4g38400.1]
A_84_P275700	TREATMENT	90 min col-0 treatment	45 min col-0 control	-0.4402	0.06879	15	6.4	1.2e-05	0.00181122		At3g44510.1	At3g44510.1	expressed protein [At3g44510.1]
A_84_P146708	TREATMENT	90 min col-0 treatment	45 min col-0 control	0.405	0.06326	15	-6.4	1.19e-05	0.00181122		At4g13100.1	At4g13100.1	zinc finger (C3HC4-type RING finger) family protein contains Pfam profile: PF00097 zinc finger, C3HC4 type (RING finger) [At4g13100.1]
A_84_P19215	TREATMENT	90 min col-0 treatment	45 min col-0 control	1.0725	0.1677	15	-6.4	1.2e-05	0.00181122		At2g21510.1	At2g21510.1	DNAJ heat shock N-terminal domain-containing protein similar to SP|P39101 CAJ1 protein, Saccharomyces cerevisiae; contains Pfam profile PF00226 DnaJ domain [At2g21510.1]
A_84_P14587	TREATMENT	90 min col-0 treatment	45 min col-0 control	1.7117	0.2677	15	-6.39	1.21e-05	0.00181122		At3g14440.1	At3g14440.1	9-cis-epoxycarotenoid dioxygenase, putative / neoxanthin cleavage enzyme, putative / carotenoid cleavage dioxygenase, putative similar to 9-cis-epoxycarotenoid dioxygenase GB:AAF26356 [GI:6715257][Phaseolus vulgaris] [At3g14440.1]
A_84_P16894	TREATMENT	90 min col-0 treatment	45 min col-0 control	0.3846	0.0603	15	-6.38	1.24e-05	0.00184707		At5g51910.1	At5g51910.1	TCP family transcription factor, putative similar to PCF2 [(GI:2580440) Oryza sativa] [At5g51910.1]
A_84_P10142	TREATMENT	90 min col-0 treatment	45 min col-0 control	0.8966	0.1407	15	-6.37	1.25e-05	0.00185293		At5g01760.1	At5g01760.1	VHS domain-containing protein / GAT domain-containing protein weak similarity to Hrs [Rattus norvegicus] GI:8547026; contains Pfam profiles PF00790: VHS domain, PF03127: GAT domain [At5g01760.1]
A_84_P13458	TREATMENT	90 min col-0 treatment	45 min col-0 control	0.259	0.04071	15	-6.36	1.28e-05	0.00188823		At2g23950.1	At2g23950.1	leucine-rich repeat family protein / protein kinase family protein contains Pfam domains PF00560: Leucine Rich Repeat and PF00069: Protein kinase domain [At2g23950.1]
A_84_P606597	TREATMENT	90 min col-0 treatment	45 min col-0 control	0.3674	0.05785	15	-6.35	1.3e-05	0.00190852		At1g03760.1	At1g03760.1	prefoldin subunit family protein contains similarity to Swiss-Prot:O94763 RNA polymerase II subunit 5-mediating protein (RPB5-mediating protein) [Homo sapiens]; contains Pfam profile PF02996: Prefoldin subunit [At1g03760.1]
A_84_P537167	TREATMENT	90 min col-0 treatment	45 min col-0 control	-1.6625	0.2622	15	6.34	1.33e-05	0.0019248		At5g41250.1	At5g41250.1	exostosin family protein contains Pfam profile: PF03016 exostosin family [At5g41250.1]
A_84_P18323	TREATMENT	90 min col-0 treatment	45 min col-0 control	-0.6292	0.09926	15	6.34	1.33e-05	0.0019248		At3g11900.1	At3g11900.1	amino acid transporter family protein low similarity to proton/amino acid transporter 1 [Mus musculus] GI:21908024; belongs to INTERPRO:IPR002422 amino acid/polyamine transporter, family II [At3g11900.1]
A_84_P13982	TREATMENT	90 min col-0 treatment	45 min col-0 control	-0.4696	0.07406	15	6.34	1.33e-05	0.0019248		At5g23870.1	At5g23870.1	pectinacetylesterase family protein contains Pfam profile: PF03283 pectinacetylesterase [At5g23870.1]
A_84_P61270	TREATMENT	90 min col-0 treatment	45 min col-0 control	-0.702	0.1109	15	6.33	1.34e-05	0.00193012		At2g37440.1	At2g37440.1	endonuclease/exonuclease/phosphatase family protein similar to inositol polyphosphate 5-phosphatase I (GI:10444261) and II (GI:10444263) [Arabidopsis thaliana]; contains Pfam profile PF03372: Endonuclease/Exonuclease/phosphatase family [At2g37440.1]
A_84_P581126	TREATMENT	90 min col-0 treatment	45 min col-0 control	-1.2049	0.1913	15	6.3	1.43e-05	0.00204051		At2g46670.1	At2g46670.1	pseudo-response regulator, putative / timing of CAB expression 1-like protein, putative similar to pseudo-response regulator 9 [Arabidopsis thaliana] GI:10281000, timing of CAB expression 1-like protein [Arabidopsis thaliana] GI:9247022 [At2g46670.1]
A_84_P17099	TREATMENT	90 min col-0 treatment	45 min col-0 control	-0.3757	0.05965	15	6.3	1.43e-05	0.00204051		At1g32740.1	At1g32740.1	expressed protein [At1g32740.1]
A_84_P59660	TREATMENT	90 min col-0 treatment	45 min col-0 control	-0.5758	0.09164	15	6.28	1.47e-05	0.00208783		At3g07460.1	At3g07460.1	expressed protein contains Pfam profile PF04398: Protein of unknown function, DUF538 [At3g07460.1]
A_84_P14870	TREATMENT	90 min col-0 treatment	45 min col-0 control	0.7844	0.1253	15	-6.26	1.52e-05	0.00214885		At5g02260.1	At5g02260.1	expansin, putative (EXP9) similar to expansin precursor GI:4138914 from [Lycopersicon esculentum]; alpha-expansin gene family, PMID:11641069 [At5g02260.1]
A_84_P94969	TREATMENT	90 min col-0 treatment	45 min col-0 control	-0.555	0.08889	15	6.24	1.57e-05	0.00220931		At5g06980.2	At5g06980.2	expressed protein [At5g06980.2]
A_84_P10316	TREATMENT	90 min col-0 treatment	45 min col-0 control	-0.5259	0.08442	15	6.23	1.61e-05	0.00224491		At5g62020.1	At5g62020.1	heat shock factor protein, putative (HSF6) / heat shock transcription factor, putative (HTSF6) identical to heat shock transcription factor 6 (HSF6) SP: Q9SCW4 from [Arabidopsis thaliana] ;contains Pfam profile: PF00447 HSF-type DNA-binding domain...
A_84_P19694	TREATMENT	90 min col-0 treatment	45 min col-0 control	0.9688	0.1555	15	-6.23	1.61e-05	0.00224491		At5g41680.1	At5g41680.1	protein kinase family protein contains protein kinase domain, Pfam:PF00069; similar to receptor-like protein kinase (GI:4008006) [Arabidopsis thaliana]; similar to receptor-like kinase RHG1 (GI:21239380) (GI:21239382) [Glycine max] [At5g41680.1]
A_84_P611989	TREATMENT	90 min col-0 treatment	45 min col-0 control	-1.7262	0.2773	15	6.22	1.63e-05	0.00226246		At1g10385.1	At1g10385.1	hypothetical protein [At1g10385.1]
A_84_P10530	TREATMENT	90 min col-0 treatment	45 min col-0 control	-0.6545	0.1054	15	6.21	1.66e-05	0.00226647		At1g75780.1	At1g75780.1	tubulin beta-1 chain (TUB1) nearly identical to SP|P12411 Tubulin beta-1 chain {Arabidopsis thaliana} [At1g75780.1]
A_84_P15451	TREATMENT	90 min col-0 treatment	45 min col-0 control	0.3437	0.05534	15	-6.21	1.67e-05	0.00226647		At1g44760.1	At1g44760.1	universal stress protein (USP) family protein contains Pfam profile PF00582: universal stress protein family [At1g44760.1]
A_84_P19610	TREATMENT	90 min col-0 treatment	45 min col-0 control	0.4637	0.07466	15	-6.21	1.67e-05	0.00226647		At5g05690.1	At5g05690.1	cytochrome P450 90A1 (CYP90A1) (CYP90) (CPD) identical to Cytochrome P450 90A1 (SP:Q42569) [Arabidopsis thaliana] [At5g05690.1]
A_84_P240015	TREATMENT	90 min col-0 treatment	45 min col-0 control	0.4651	0.07481	15	-6.22	1.65e-05	0.00226647		At4g31270.1	At4g31270.1	expressed protein [At4g31270.1]
A_84_P24135	TREATMENT	90 min col-0 treatment	45 min col-0 control	0.8459	0.1361	15	-6.22	1.65e-05	0.00226647		At3g55710.1	At3g55710.1	UDP-glucoronosyl/UDP-glucosyl transferase family protein contains Pfam profile: PF00201 UDP-glucoronosyl and UDP-glucosyl transferase [At3g55710.1]
A_84_P593587	TREATMENT	90 min col-0 treatment	45 min col-0 control	0.4587	0.07393	15	-6.2	1.69e-05	0.00228347		At2g35430.1	At2g35430.1	zinc finger (CCCH-type) family protein contains Pfam domain, PF00642: Zinc finger C-x8-C-x5-C-x3-H type (and similar) [At2g35430.1]
A_84_P247115	TREATMENT	90 min col-0 treatment	45 min col-0 control	0.4	0.06452	15	-6.2	1.7e-05	0.00228686		At2g32710.1	At2g32710.1	kip-related protein 4 (KRP4) / cyclin-dependent kinase inhibitor 4 (ICK4) nearly identical to cyclin-dependent kinase inhibitor 4 (krp4) [Arabidopsis thaliana] GI:14422291 [At2g32710.1]
A_84_P531386	TREATMENT	90 min col-0 treatment	45 min col-0 control	0.6996	0.1129	15	-6.2	1.71e-05	0.00229022		At2g34910.1	At2g34910.1	expressed protein [At2g34910.1]
A_84_P21948	TREATMENT	90 min col-0 treatment	45 min col-0 control	1.0384	0.1677	15	-6.19	1.73e-05	0.00230689		At1g66920.1	At1g66920.1	serine/threonine protein kinase, putative similar to receptor serine/threonine kinase PR55K gi|1235680|gb|AAC49208; contains protein kinase domain, Pfam:PF00069; contains serine/threonine protein kinase domain, INTERPRO:IPR002290 [At1g66920.1]
A_84_P123552	TREATMENT	90 min col-0 treatment	45 min col-0 control	-0.4262	0.06895	15	6.18	1.76e-05	0.00233669		At4g26990.1	At4g26990.1	expressed protein [At4g26990.1]
A_84_P16075	TREATMENT	90 min col-0 treatment	45 min col-0 control	-0.6874	0.1115	15	6.17	1.81e-05	0.00239267		At1g64440.1	At1g64440.1	UDP-glucose 4-epimerase, putative / UDP-galactose 4-epimerase, putative / Galactowaldenase, putative similar to UDP-galactose 4-epimerase from Arabidopsis thaliana SP|Q42605, Cyamopsis tetragonoloba GI:3021357 [AJ005082] (Plant Sci. 142, 147-154...
A_84_P14783	TREATMENT	90 min col-0 treatment	45 min col-0 control	0.4224	0.0686	15	-6.16	1.83e-05	0.00240868		At4g24780.1	At4g24780.1	pectate lyase family protein similar to pectate lyase GP:14289169 from [Salix gilgiana] [At4g24780.1]
A_84_P21480	TREATMENT	90 min col-0 treatment	45 min col-0 control	-3.0926	0.5027	15	6.15	1.85e-05	0.00242456		At4g17090.1	At4g17090.1	beta-amylase (CT-BMY) / 1,4-alpha-D-glucan maltohydrolase identical to beta-amylase enzyme GI:6065749 from [Arabidopsis thaliana] [At4g17090.1]
A_84_P96296	TREATMENT	90 min col-0 treatment	45 min col-0 control	0.4871	0.07924	15	-6.15	1.87e-05	0.00244029		At3g24450.1	At3g24450.1	copper-binding family protein similar to copper homeostasis factor gi:3168840 from Arabidopsis thaliana; contains Pfam profile PF00403: Heavy-metal-associated domain [At3g24450.1]
A_84_P583074	TREATMENT	90 min col-0 treatment	45 min col-0 control	1.567	0.255	15	-6.14	1.88e-05	0.0024429		At3g55720.1	At3g55720.1	expressed protein contains Pfam profile PF04788: Protein of unknown function (DUF620) [At3g55720.1]
A_84_P21557	TREATMENT	90 min col-0 treatment	45 min col-0 control	-0.3132	0.05102	15	6.14	1.89e-05	0.00244549		At5g26120.1	At5g26120.1	glycosyl hydrolase family protein 51 similar to arabinoxylan arabinofuranohydrolase isoenzyme AXAH-II from GI:13398414 [Hordeum vulgare] [At5g26120.1]
A_84_P17318	TREATMENT	90 min col-0 treatment	45 min col-0 control	-0.9398	0.1533	15	6.13	1.93e-05	0.00248671		At2g46340.1	At2g46340.1	phytochrome A supressor spa1 (SPA1) identical to phytochrome A supressor spa1 (GI:4809171) [Arabidopsis thaliana]; contains 8 WD-40 repeats (Pfam PF00400) (1 weak) [At2g46340.1]
A_84_P21382	TREATMENT	90 min col-0 treatment	45 min col-0 control	0.798	0.1305	15	-6.11	1.98e-05	0.00254041		At4g19200.1	At4g19200.1	proline-rich family protein contains proline rich extensin domains, INTERPRO:IPR002965 [At4g19200.1]
A_84_P226859	TREATMENT	90 min col-0 treatment	45 min col-0 control	-1.2995	0.213	15	6.1	2.03e-05	0.00256151		At5g24570.1	At5g24570.1	expressed protein [At5g24570.1]
A_84_P272390	TREATMENT	90 min col-0 treatment	45 min col-0 control	-0.5675	0.09304	15	6.1	2.03e-05	0.00256151		At2g45180.1	At2g45180.1	protease inhibitor/seed storage/lipid transfer protein (LTP) family protein similar to 14 kDa polypeptide [Catharanthus roseus] GI:407410; contains Pfam protease inhibitor/seed storage/LTP family domain PF00234 [At2g45180.1]
A_84_P554387	TREATMENT	90 min col-0 treatment	45 min col-0 control	1.0308	0.169	15	-6.1	2.03e-05	0.00256151		At2g23440.1	At2g23440.1	expressed protein [At2g23440.1]
A_84_P103276	TREATMENT	90 min col-0 treatment	45 min col-0 control	1.3544	0.2218	15	-6.11	2.01e-05	0.00256151		At5g02160.1	At5g02160.1	expressed protein [At5g02160.1]
A_84_P21192	TREATMENT	90 min col-0 treatment	45 min col-0 control	0.4989	0.08204	15	-6.08	2.1e-05	0.00262812		At3g19930.1	At3g19930.1	sugar transport protein (STP4) identical to GB:S25009 GI:16524 from [Arabidopsis thaliana] [At3g19930.1]
A_84_P12428	TREATMENT	90 min col-0 treatment	45 min col-0 control	0.5601	0.09209	15	-6.08	2.1e-05	0.00262812		At1g74010.1	At1g74010.1	strictosidine synthase family protein similar to strictosidine synthase [Rauvolfia serpentina][SP|P15324]; contains strictosidine synthase domain PF03088 [At1g74010.1]
A_84_P22624	TREATMENT	90 min col-0 treatment	45 min col-0 control	-0.3876	0.06379	15	6.08	2.12e-05	0.00264232		At5g65790.1	At5g65790.1	myb family transcription factor (MYB68) identical to putative transcription factor (MYB68) GI:3941493 from [Arabidopsis thaliana]; contains Pfam profile: PF00249 myb-like DNA-binding domain [At5g65790.1]
A_84_P14596	TREATMENT	90 min col-0 treatment	45 min col-0 control	-0.4366	0.07191	15	6.07	2.14e-05	0.00265641		At3g20040.1	At3g20040.1	hexokinase, putative similar to hexokinase 1 [Spinacia oleracea] Swiss-Prot:Q9SEK3 [At3g20040.1]
A_84_P247425	TREATMENT	90 min col-0 treatment	45 min col-0 control	-0.6784	0.1118	15	6.07	2.15e-05	0.00265802		At4g04990.1	At4g04990.1	expressed protein contains Pfam domain PF05553: Cotton fiber expressed protein [At4g04990.1]
A_84_P13898	TREATMENT	90 min col-0 treatment	45 min col-0 control	-1.4097	0.2324	15	6.07	2.16e-05	0.00265961		At4g39000.1	At4g39000.1	glycosyl hydrolase family 9 protein endo-1,4-beta-glucanase precursor - Fragariax ananassa, PID:g3549291 [At4g39000.1]
A_84_P538753	TREATMENT	90 min col-0 treatment	45 min col-0 control	-0.5116	0.08441	15	6.06	2.18e-05	0.00266276		At4g16950.2	At4g16950.2	disease resistance protein (TIR-NBS-LRR class), putative domain signature TIR-NBS-LRR exists, suggestive of a disease resistance protein.; closest homolog in Col-0 to RPP5 of clutivar Landsberg erecta. [At4g16950.2]
A_84_P734564	TREATMENT	90 min col-0 treatment	45 min col-0 control	1.2475	0.2058	15	-6.06	2.18e-05	0.00266276		TC256618	TC256618	Arabidopsis thaliana mRNA, clone: RAFL16-94-N17 [AK117375]
A_84_P118232	TREATMENT	90 min col-0 treatment	45 min col-0 control	0.6078	0.1003	15	-6.06	2.19e-05	0.00266432		At5g16360.1	At5g16360.1	NC domain-containing protein contains Pfam domain, PF04970: NC domain [At5g16360.1]
A_84_P15052	TREATMENT	90 min col-0 treatment	45 min col-0 control	-0.7041	0.1166	15	6.04	2.26e-05	0.00271701		At5g64620.1	At5g64620.1	invertase/pectin methylesterase inhibitor family protein low similarity to SP|P83326 Pectinesterase inhibitor (Pectin methylesterase inhibitor) (PMEI) {Actinidia chinensis}; contains Pfam profile PF04043: Plant invertase/pectin methylesterase...
A_84_P217118	TREATMENT	90 min col-0 treatment	45 min col-0 control	0.3546	0.05868	15	-6.04	2.25e-05	0.00271701		At5g05550.1	At5g05550.1	expressed protein similar to 6b-interacting protein 1 (NtSIP1) [Nicotiana tabacum] GI:18149189 [At5g05550.1]
A_84_P17030	TREATMENT	90 min col-0 treatment	45 min col-0 control	0.3961	0.06558	15	-6.04	2.26e-05	0.00271701		CHR1:000941573-000941517	CHR1:000941573-000941517	Unknown
A_84_P19553	TREATMENT	90 min col-0 treatment	45 min col-0 control	-1.5422	0.2558	15	6.03	2.31e-05	0.00276623		At4g33790.1	At4g33790.1	acyl CoA reductase, putative similar to acyl CoA reductase [Simmondsia chinensis] GI:5020215; contains Pfam profile PF03015: Male sterility protein; No start codon identified, may contain anomalous splicing at 5' end. [At4g33790.1]
A_84_P241573	TREATMENT	90 min col-0 treatment	45 min col-0 control	-1.511	0.2508	15	6.02	2.33e-05	0.00277928		At2g02950.1	At2g02950.1	phytochrome kinase substrate 1 (PKS1) identical to Swiss-Prot:Q9SWI1 phytochrome kinase substrate 1 [Arabidopsis thaliana] [At2g02950.1]
A_84_P717941	TREATMENT	90 min col-0 treatment	45 min col-0 control	0.5252	0.0873	15	-6.02	2.36e-05	0.00280411		CHR3:022302071-022302130	CHR3:022302071-022302130	Unknown
A_84_P724202	TREATMENT	90 min col-0 treatment	45 min col-0 control	-0.1867	0.03105	15	6.01	2.38e-05	0.00281691		CHR1:016785223-016785164	CHR1:016785223-016785164	Unknown
A_84_P23263	TREATMENT	90 min col-0 treatment	45 min col-0 control	0.2474	0.0412	15	-6	2.42e-05	0.0028532		At4g12570.1	At4g12570.1	ubiquitin-protein ligase, putative similar to SP|P39940 Ubiquitin--protein ligase RSP5 (EC 6.3.2.-) {Saccharomyces cerevisiae}; contains Pfam profiles PF00240: Ubiquitin family, PF00632: HECT-domain (ubiquitin-transferase) [At4g12570.1]
A_84_P110752	TREATMENT	90 min col-0 treatment	45 min col-0 control	-0.4581	0.07641	15	6	2.45e-05	0.00287746		At3g13520.1	At3g13520.1	arabinogalactan-protein (AGP12) identical to gi|10880501|gb|AAG24280 [At3g13520.1]
A_84_P22783	TREATMENT	90 min col-0 treatment	45 min col-0 control	-0.7542	0.126	15	5.99	2.49e-05	0.00291323		At1g72890.1	At1g72890.1	disease resistance protein (TIR-NBS class), putative domain signature TIR-NBS exists, suggestive of a disease resistance protein. [At1g72890.1]
A_84_P576032	TREATMENT	90 min col-0 treatment	45 min col-0 control	0.6602	0.1104	15	-5.98	2.51e-05	0.00292542		At4g23420.1	At4g23420.1	short-chain dehydrogenase/reductase (SDR) family protein similar to WW-domain oxidoreductase [Mus musculus] GI:6934274, WW domain-containing oxidoreductase isoform FORII [Homo sapiens] GI:15667686; contains Pfam PF00106: oxidoreductase, short chain...
A_84_P738324	TREATMENT	90 min col-0 treatment	45 min col-0 control	0.5672	0.09497	15	-5.97	2.55e-05	0.00296074		BX832852	BX832852	Arabidopsis thaliana Full-length cDNA Complete sequence from clone GSLTSIL17ZG05 of Silique of strain col-0 of Arabidopsis thaliana (thale cress) [BX832852]
A_84_P22087	TREATMENT	90 min col-0 treatment	45 min col-0 control	-0.6345	0.1063	15	5.97	2.56e-05	0.00296109		At3g10190.1	At3g10190.1	calmodulin, putative similar to calmodulin NtCaM13 [Nicotiana tabacum] GI:14625425, calmodulin GB:AAA34015 [Glycine max]; contains INTERPRO:IPR002048 calcium-binding EF-hand domain [At3g10190.1]
A_84_P613412	TREATMENT	90 min col-0 treatment	45 min col-0 control	-0.9411	0.1577	15	5.97	2.58e-05	0.00297297		At4g16990.1	At4g16990.1	disease resistance protein (TIR-NBS class), putative domain signature TIR-NBS exists, suggestive of a disease resistance protein. [At4g16990.1]
A_84_P10395	TREATMENT	90 min col-0 treatment	45 min col-0 control	-1.0604	0.1778	15	5.96	2.6e-05	0.00298475		At1g19050.1	At1g19050.1	two-component responsive regulator / response regulator 7 (ARR7) identical to response regulator 7 GI:3953603 from [Arabidopsis thaliana] [At1g19050.1]
A_84_P15045	TREATMENT	90 min col-0 treatment	45 min col-0 control	0.5486	0.0921	15	-5.96	2.63e-05	0.00300788		At5g62820.1	At5g62820.1	integral membrane protein, putative MtN24, Medicago truncatula, EMBL:MTY15290; contains Pfam PF04535 : Domain of unknown function (DUF588); contains 4 transmembrane domains ; similar to putative ethylene responsive element binding protein...
A_84_P20171	TREATMENT	90 min col-0 treatment	45 min col-0 control	0.3478	0.05842	15	-5.95	2.65e-05	0.00301945		At2g16400.1	At2g16400.1	homeodomain-containing protein [At2g16400.1]
A_84_P20046	TREATMENT	90 min col-0 treatment	45 min col-0 control	-1.0017	0.1683	15	5.95	2.66e-05	0.00301957		At1g14280.1	At1g14280.1	phytochrome kinase, putative contains similarity to Swiss-Prot:Q9SWI1 phytochrome kinase substrate 1 [Arabidopsis thaliana] [At1g14280.1]
A_84_P12813	TREATMENT	90 min col-0 treatment	45 min col-0 control	-0.7092	0.1195	15	5.94	2.73e-05	0.00308756		At3g62270.1	At3g62270.1	anion exchange family protein contains similarity to anion exchanger 3, cardiac splice form - Rattus norvegicus, PIR:A42497 [At3g62270.1]
A_84_P732531	TREATMENT	90 min col-0 treatment	45 min col-0 control	-0.6952	0.1172	15	5.93	2.76e-05	0.00309837		CHR1:007886848-007886789	CHR1:007886848-007886789	Unknown
A_84_P13299	TREATMENT	90 min col-0 treatment	45 min col-0 control	-0.5126	0.08646	15	5.93	2.77e-05	0.00309837		At1g31130.1	At1g31130.1	expressed protein [At1g31130.1]
A_84_P307510	TREATMENT	90 min col-0 treatment	45 min col-0 control	1.2449	0.21	15	-5.93	2.77e-05	0.00309837		At4g08040.1	At4g08040.1	1-aminocyclopropane-1-carboxylate synthase, putative / ACC synthase, putative similar to ACC synthase from Malus sylvestris [SP|P37821], Solanum tuberosum [GI:520914] [At4g08040.1]
A_84_P12398	TREATMENT	90 min col-0 treatment	45 min col-0 control	-0.7153	0.1209	15	5.92	2.83e-05	0.0031308		At1g53340.1	At1g53340.1	DC1 domain-containing protein contains Pfam protein PF03107 DC1 domain [At1g53340.1]
A_84_P504658	TREATMENT	90 min col-0 treatment	45 min col-0 control	0.4234	0.07156	15	-5.92	2.83e-05	0.0031308		At1g70100.3	At1g70100.3	expressed protein [At1g70100.3]
A_84_P118432	TREATMENT	90 min col-0 treatment	45 min col-0 control	0.5297	0.08947	15	-5.92	2.81e-05	0.0031308		At1g78100.1	At1g78100.1	F-box family protein contains F-box domain Pfam:PF00646 [At1g78100.1]
A_84_P15725	TREATMENT	90 min col-0 treatment	45 min col-0 control	0.8538	0.1444	15	-5.91	2.84e-05	0.0031308		At4g23810.1	At4g23810.1	WRKY family transcription factor AR411 - Arabidopsis thaliana (thale cress), PID:g1669603 [At4g23810.1]
A_84_P14679	TREATMENT	90 min col-0 treatment	45 min col-0 control	-0.2489	0.04211	15	5.91	2.86e-05	0.0031415		At3g56200.1	At3g56200.1	amino acid transporter family protein low similarity to N system amino acids transporter NAT-1 [Mus musculus] GI:7406950; belongs to INTERPRO:IPR002422 amino acid/polyamine transporter, family II [At3g56200.1]
A_84_P540652	TREATMENT	90 min col-0 treatment	45 min col-0 control	-0.716	0.1216	15	5.89	2.98e-05	0.00326158		At5g15900.1	At5g15900.1	expressed protein several hypothetical proteins - Arabidopsis thaliana [At5g15900.1]
A_84_P19651	TREATMENT	90 min col-0 treatment	45 min col-0 control	0.2663	0.04527	15	-5.88	3.01e-05	0.00328265		At5g19200.1	At5g19200.1	short-chain dehydrogenase/reductase (SDR) family protein similar to follicular variant translocation protein 1 precursor (FVT-1) SP:Q06136 from [Homo sapiens] [At5g19200.1]
A_84_P226299	TREATMENT	90 min col-0 treatment	45 min col-0 control	-0.2904	0.04942	15	5.88	3.04e-05	0.00330357		At5g19390.1	At5g19390.1	pleckstrin homology (PH) domain-containing protein / RhoGAP domain-containing protein weak similarity to rho-GTPase activating protein [Homo sapiens] GI:14245732; contains Pfam profiles PF00169: PH domain, PF00620: RhoGAP domain [At5g19390.1]
A_84_P198744	TREATMENT	90 min col-0 treatment	45 min col-0 control	0.4116	0.07012	15	-5.87	3.08e-05	0.00333517		At5g07790.1	At5g07790.1	expressed protein [At5g07790.1]
A_84_P22481	TREATMENT	90 min col-0 treatment	45 min col-0 control	-0.6234	0.1064	15	5.86	3.16e-05	0.00340971		At5g16590.1	At5g16590.1	leucine-rich repeat transmembrane protein kinase, putative [At5g16590.1]
A_84_P221686	TREATMENT	90 min col-0 treatment	45 min col-0 control	0.3576	0.06115	15	-5.85	3.21e-05	0.00345146		At5g57100.1	At5g57100.1	transporter-related low similarity to GDP-fucose transporter [Caenorhabditis elegans] GI:13940504, phosphoenolpyruvate/phosphate translocator precursor [Mesembryanthemum crystallinum] GI:9295275 [At5g57100.1]
A_84_P17417	TREATMENT	90 min col-0 treatment	45 min col-0 control	-1.3894	0.2379	15	5.84	3.26e-05	0.00349292		At3g18460.1	At3g18460.1	hypothetical protein similar to PGPS/D12 [Petunia x hybrida] GI:4105794; contains Pfam profile PF04749: Protein of unknown function, DUF614 [At3g18460.1]
A_84_P15298	TREATMENT	90 min col-0 treatment	45 min col-0 control	0.3424	0.05867	15	-5.84	3.28e-05	0.00350206		At1g25520.1	At1g25520.1	expressed protein contains Pfam profile PF01169: Uncharacterized protein family UPF0016 [At1g25520.1]
A_84_P14701	TREATMENT	90 min col-0 treatment	45 min col-0 control	-1.4976	0.2574	15	5.82	3.39e-05	0.0036069		At3g61880.1	At3g61880.1	cytochrome P450, putative similar to cytochrome p450 SP:O48927 from [Arabidopsis thaliana] [At3g61880.1]
A_84_P192624	TREATMENT	90 min col-0 treatment	45 min col-0 control	-0.6723	0.1156	15	5.82	3.41e-05	0.00361558		At3g49840.1	At3g49840.1	proline-rich family protein contains proline rich extensin domains, INTERPRO:IPR002965 [At3g49840.1]
A_84_P592283	TREATMENT	90 min col-0 treatment	45 min col-0 control	0.6012	0.1035	15	-5.81	3.44e-05	0.00363477		At5g48090.1	At5g48090.1	expressed protein ; expression supported by MPSS [At5g48090.1]
A_84_P248365	TREATMENT	90 min col-0 treatment	45 min col-0 control	-0.7395	0.1274	15	5.81	3.47e-05	0.00364127		At4g37240.1	At4g37240.1	expressed protein [At4g37240.1]
A_84_P21917	TREATMENT	90 min col-0 treatment	45 min col-0 control	-0.5624	0.09687	15	5.81	3.46e-05	0.00364127		At1g22335.1	At1g22335.1	expressed protein ; expression supported by MPSS [At1g22335.1]
A_84_P14585	TREATMENT	90 min col-0 treatment	45 min col-0 control	-0.9664	0.1669	15	5.79	3.56e-05	0.00372292		At3g16800.1	At3g16800.1	protein phosphatase 2C, putative / PP2C, putative similar to protein phosphatase-2C GB:AAC36699 from [Mesembryanthemum crystallinum] [At3g16800.1]
A_84_P286000	TREATMENT	90 min col-0 treatment	45 min col-0 control	0.403	0.06972	15	-5.78	3.63e-05	0.00378316		At5g20030.1	At5g20030.1	agenet domain-containing protein contains Pfam PF05641: Agenet domain [At5g20030.1]
A_84_P18634	TREATMENT	90 min col-0 treatment	45 min col-0 control	-0.3907	0.06765	15	5.78	3.66e-05	0.00378857		At4g14700.1	At4g14700.1	replication control protein, putative similar to origin recognition complex subunit 1 (Replication control protein 1) [Homo sapiens] SWISS-PROT:Q13415 [At4g14700.1]
A_84_P19834	TREATMENT	90 min col-0 treatment	45 min col-0 control	0.5384	0.09321	15	-5.78	3.66e-05	0.00378857		At1g20530.1	At1g20530.1	hypothetical protein [At1g20530.1]
A_84_P583082	TREATMENT	90 min col-0 treatment	45 min col-0 control	0.877	0.1521	15	-5.77	3.71e-05	0.00382735		At3g58190.1	At3g58190.1	LOB domain protein 29 / lateral organ boundaries domain protein 29 (LBD29) identical to SP|Q9M2J7 LOB domain protein 29 {Arabidopsis thaliana}; supported by full-length cDNA gi:17227167 [At3g58190.1]
A_84_P62760	TREATMENT	90 min col-0 treatment	45 min col-0 control	0.3638	0.06316	15	-5.76	3.77e-05	0.00387065		At4g26555.1	At4g26555.1	immunophilin / FKBP-type peptidyl-prolyl cis-trans isomerase family protein similar to FK506-binding protein (Peptidyl-prolyl cis-trans isomerase) (PPiase) (Rotamase) (SP:P25138) [{Neisseria meningitidis]; contains Pfam profile: PF00254 FKBP-type...
A_84_P21986	TREATMENT	90 min col-0 treatment	45 min col-0 control	1.3991	0.243	15	-5.76	3.79e-05	0.00387065		CHR2:009686022-009686081	CHR2:009686022-009686081	Unknown
A_84_P539084	TREATMENT	90 min col-0 treatment	45 min col-0 control	2.1915	0.3807	15	-5.76	3.79e-05	0.00387065		At1g06135.1	At1g06135.1	expressed protein [At1g06135.1]
A_84_P11480	TREATMENT	90 min col-0 treatment	45 min col-0 control	0.3421	0.05947	15	-5.75	3.82e-05	0.00387537		At1g53480.1	At1g53480.1	expressed protein [At1g53480.1]
A_84_P98956	TREATMENT	90 min col-0 treatment	45 min col-0 control	0.7208	0.1253	15	-5.75	3.81e-05	0.00387537		At5g42200.1	At5g42200.1	zinc finger (C3HC4-type RING finger) family protein contains Pfam profile: PF00097 zinc finger, C3HC4 type (RING finger) [At5g42200.1]
A_84_P132975	TREATMENT	90 min col-0 treatment	45 min col-0 control	0.2741	0.04771	15	-5.75	3.87e-05	0.00391309		At5g57655.2	At5g57655.2	xylose isomerase family protein contains similarity to Xylose isomerase (EC 5.3.1.5) (Swiss-Prot:P22842) [Thermoanaerobacter ethanolicus] [At5g57655.2]
A_84_P563349	TREATMENT	90 min col-0 treatment	45 min col-0 control	0.4423	0.07734	15	-5.72	4.07e-05	0.00410174		At3g06455.1	At3g06455.1	splicing factor-related contains weak similarity to Swiss-Prot:Q12874 splicing factor 3A subunit 3 (Spliceosome associated protein 61, SAP 61, SF3a60) [Homo sapiens] [At3g06455.1]
A_84_P107162	TREATMENT	90 min col-0 treatment	45 min col-0 control	-1.0875	0.1906	15	5.71	4.16e-05	0.00416495		At5g62100.1	At5g62100.1	BAG domain-containing protein similar to BAG domain containing proteins (At5g07220, At5g52060) [At5g62100.1]
A_84_P12781	TREATMENT	90 min col-0 treatment	45 min col-0 control	-0.4568	0.08004	15	5.71	4.15e-05	0.00416495		At3g54400.1	At3g54400.1	aspartyl protease family protein contains Pfam profile: PF00026 eukaryotic aspartyl protease [At3g54400.1]
A_84_P555267	TREATMENT	90 min col-0 treatment	45 min col-0 control	-1.2233	0.2146	15	5.7	4.2e-05	0.00418278		At2g22460.1	At2g22460.1	expressed protein contains Pfam profile PF04759: Protein of unknown function, DUF617 [At2g22460.1]
A_84_P17611	TREATMENT	90 min col-0 treatment	45 min col-0 control	-0.8807	0.1546	15	5.7	4.24e-05	0.00418278		At4g22460.1	At4g22460.1	protease inhibitor/seed storage/lipid transfer protein (LTP) family protein contains Pfam profile: PF00234 protease inhibitor/seed storage/LTP family [At4g22460.1]
A_84_P12467	TREATMENT	90 min col-0 treatment	45 min col-0 control	-0.8371	0.147	15	5.7	4.24e-05	0.00418278		At1g55430.1	At1g55430.1	DC1 domain-containing protein contains Pfam profile PF03107: DC1 domain [At1g55430.1]
A_84_P15653	TREATMENT	90 min col-0 treatment	45 min col-0 control	-0.5933	0.1042	15	5.69	4.26e-05	0.00418278		At3g63470.1	At3g63470.1	serine carboxypeptidase, putative similar to SP|P52711 Serine carboxypeptidase II-3 precursor (EC 3.4.16.6) Hordeum vulgare; contains Pfam profile PF0450 serine carboxypeptidase [At3g63470.1]
A_84_P17817	TREATMENT	90 min col-0 treatment	45 min col-0 control	-0.5246	0.09213	15	5.69	4.25e-05	0.00418278		At5g45810.1	At5g45810.1	CBL-interacting protein kinase 19 (CIPK19) identical to CBL-interacting protein kinase 19 [Arabidopsis thaliana] gi|14009296|gb|AAK50347 [At5g45810.1]
A_84_P74644	TREATMENT	90 min col-0 treatment	45 min col-0 control	0.2316	0.04063	15	-5.7	4.21e-05	0.00418278		At4g21790.1	At4g21790.1	transmembrane protein-related (TOM1) contains some similarity to transmembrane protein TOM3 GI:15425641 from [Arabidopsis thaliana]; identical to cDNA TOM1 GI:9967414 [At4g21790.1]
A_84_P290214	TREATMENT	90 min col-0 treatment	45 min col-0 control	0.2632	0.04628	15	-5.69	4.3e-05	0.00420853		At2g37930.1	At2g37930.1	expressed protein [At2g37930.1]
A_84_P738086	TREATMENT	90 min col-0 treatment	45 min col-0 control	-0.6338	0.1115	15	5.69	4.32e-05	0.00421459		TC278017	TC278017	Unknown
A_84_P75684	TREATMENT	90 min col-0 treatment	45 min col-0 control	-0.5083	0.08949	15	5.68	4.36e-05	0.00424007		At4g17220.1	At4g17220.1	expressed protein [At4g17220.1]
A_84_P23359	TREATMENT	90 min col-0 treatment	45 min col-0 control	-1.0498	0.1849	15	5.68	4.38e-05	0.004246		At4g39770.1	At4g39770.1	trehalose-6-phosphate phosphatase, putative similar to trehalose-6-phosphate phosphatase (AtTPPB) [Arabidopsis thaliana] GI:2944180; contains Pfam profile PF02358: Trehalose-phosphatase [At4g39770.1]
A_84_P21069	TREATMENT	90 min col-0 treatment	45 min col-0 control	-0.6171	0.1087	15	5.68	4.4e-05	0.00425189		At2g06850.1	At2g06850.1	xyloglucan:xyloglucosyl transferase / xyloglucan endotransglycosylase / endo-xyloglucan transferase (EXT) (EXGT-A1) identical to endo-xyloglucan transferase (ext) GI:469484 and endoxyloglucan transferase (EXGT-A1) GI:5533309 from [Arabidopsis...
A_84_P89429	TREATMENT	90 min col-0 treatment	45 min col-0 control	-0.7866	0.1386	15	5.67	4.42e-05	0.00425774		At1g09540.1	At1g09540.1	myb family transcription factor (MYB61) contains PFAM profile: myb DNA-binding domain PF00249 [At1g09540.1]
A_84_P17673	TREATMENT	90 min col-0 treatment	45 min col-0 control	0.8427	0.1489	15	-5.66	4.52e-05	0.00434038		At4g37400.1	At4g37400.1	cytochrome P450 family protein similar to cytochrome P450 monooxygenase CYP91A2, Arabidopsis thaliana, D78607 [At4g37400.1]
A_84_P272840	TREATMENT	90 min col-0 treatment	45 min col-0 control	0.1931	0.03414	15	-5.66	4.56e-05	0.00436506		At1g33520.1	At1g33520.1	KOW domain-containing protein / D111/G-patch domain-containing protein contains Pfam profiles PF01585: G-patch domain, PF00467: KOW motif [At1g33520.1]
A_84_P87549	TREATMENT	90 min col-0 treatment	45 min col-0 control	-1.0852	0.1922	15	5.65	4.64e-05	0.00441397		At3g17609.1	At3g17609.1	bZIP transcription factor family protein / HY5-like protein (HYH) nearly identical to HY5-like protein [Arabidopsis thaliana] GI:18042111; similar to TGACG-motif binding factor GI:2934884 from [Glycine max]; contains Pfam profile: PF00170 bZIP...
A_84_P20462	TREATMENT	90 min col-0 treatment	45 min col-0 control	2.1135	0.3743	15	-5.65	4.64e-05	0.00441397		At4g25490.1	At4g25490.1	DRE-binding protein (DREB1B) / CRT/CRE-binding factor 1 (CBF1) / transcriptional activator CBF1 identical to DREB1B GI:3738225 from [Arabidopsis thaliana], DREB1B [Arabidopsis thaliana] GI:3660550, transcriptional activator CBF1 [Arabidopsis thaliana]...
A_84_P21887	TREATMENT	90 min col-0 treatment	45 min col-0 control	-0.2807	0.04973	15	5.64	4.67e-05	0.00442871		At1g68550.1	At1g68550.1	AP2 domain-containing transcription factor, putative contains Pfam profile: PF00847 AP2 domain [At1g68550.1]
A_84_P240515	TREATMENT	90 min col-0 treatment	45 min col-0 control	-1.634	0.2902	15	5.63	4.78e-05	0.00448677		At5g24660.1	At5g24660.1	expressed protein [At5g24660.1]
A_84_P559780	TREATMENT	90 min col-0 treatment	45 min col-0 control	-1.3673	0.2428	15	5.63	4.78e-05	0.00448677		At2g46480.1	At2g46480.1	glycosyl transferase family 8 protein contains Pfam profile: PF01501 glycosyl transferase family 8; [At2g46480.1]
A_84_P153128	TREATMENT	90 min col-0 treatment	45 min col-0 control	-1.2881	0.2287	15	5.63	4.76e-05	0.00448677		At4g16980.1	At4g16980.1	arabinogalactan-protein family similar to arabinogalactan protein [Arabidopsis thaliana] gi|10880495|gb|AAG24277; contains proline-rich extensin domains, INTERPRO:IPR002965 [At4g16980.1]
A_84_P714722	TREATMENT	90 min col-0 treatment	45 min col-0 control	0.6528	0.1159	15	-5.63	4.79e-05	0.00448677		BX837902	BX837902	Unknown
A_84_P214628	TREATMENT	90 min col-0 treatment	45 min col-0 control	0.3733	0.06646	15	-5.62	4.91e-05	0.00457113		At5g52900.1	At5g52900.1	expressed protein [At5g52900.1]
A_84_P736196	TREATMENT	90 min col-0 treatment	45 min col-0 control	0.6132	0.1092	15	-5.62	4.9e-05	0.00457113		AV521081	AV521081	AV521081 Arabidopsis thaliana aboveground organs two to six-week old Arabidopsis thaliana cDNA clone APZ43b09F 3', mRNA sequence [AV521081]
A_84_P16642	TREATMENT	90 min col-0 treatment	45 min col-0 control	-0.633	0.1129	15	5.61	5.01e-05	0.00465006		At4g12720.1	At4g12720.1	MutT/nudix family protein similar to SP|P53370 Nucleoside diphosphate-linked moiety X motif 6 {Homo sapiens}; contains Pfam profile PF00293: NUDIX domain [At4g12720.1]
A_84_P148398	TREATMENT	90 min col-0 treatment	45 min col-0 control	-0.2805	0.0501	15	5.6	5.08e-05	0.00468654		At1g77500.1	At1g77500.1	expressed protein contains Pfam domains, PF04782: Protein of unknown function (DUF632) and PF04783: Protein of unknown function (DUF630) [At1g77500.1]
A_84_P16109	TREATMENT	90 min col-0 treatment	45 min col-0 control	0.3821	0.06825	15	-5.6	5.08e-05	0.00468654		At1g80870.1	At1g80870.1	protein kinase family protein contains eukaryotic protein kinase domain, INTERPRO:IPR000719 [At1g80870.1]
A_84_P22273	TREATMENT	90 min col-0 treatment	45 min col-0 control	-1.1866	0.2124	15	5.59	5.21e-05	0.00472089		At1g05880.1	At1g05880.1	expressed protein [At1g05880.1]
A_84_P12073	TREATMENT	90 min col-0 treatment	45 min col-0 control	-0.847	0.1515	15	5.59	5.17e-05	0.00472089		At1g18290.1	At1g18290.1	hypothetical protein [At1g18290.1]
A_84_P17842	TREATMENT	90 min col-0 treatment	45 min col-0 control	-0.3621	0.06482	15	5.59	5.2e-05	0.00472089		At5g52510.1	At5g52510.1	scarecrow-like transcription factor 8 (SCL8) [At5g52510.1]
A_84_P129076	TREATMENT	90 min col-0 treatment	45 min col-0 control	0.2226	0.03983	15	-5.59	5.17e-05	0.00472089		At2g39805.1	At2g39805.1	integral membrane Yip1 family protein contains Pfam domain, PF04893: Yip1 domain [At2g39805.1]
A_84_P609653	TREATMENT	90 min col-0 treatment	45 min col-0 control	0.4994	0.08933	15	-5.59	5.15e-05	0.00472089		At3g09050.1	At3g09050.1	expressed protein [At3g09050.1]
A_84_P520804	TREATMENT	90 min col-0 treatment	45 min col-0 control	0.6978	0.1249	15	-5.59	5.2e-05	0.00472089		At3g06020.1	At3g06020.1	expressed protein ; expression supported by MPSS [At3g06020.1]
A_84_P23349	TREATMENT	90 min col-0 treatment	45 min col-0 control	-1.1319	0.2031	15	5.57	5.31e-05	0.00479727		At4g37470.1	At4g37470.1	hydrolase, alpha/beta fold family protein low similarity to SP|Q59093 3-oxoadipate enol-lactonase I (EC 3.1.1.24) (Enol-lactone hydrolase I) (Beta-ketoadipate enol-lactone hydrolase I) {Acinetobacter calcoaceticus}; contains Pfam profile PF00561:...
A_84_P100216	TREATMENT	90 min col-0 treatment	45 min col-0 control	-0.5542	0.09952	15	5.57	5.37e-05	0.00483716		At5g54240.1	At5g54240.1	expressed protein [At5g54240.1]
A_84_P12341	TREATMENT	90 min col-0 treatment	45 min col-0 control	-0.9589	0.1723	15	5.57	5.39e-05	0.0048409		At1g75620.1	At1g75620.1	glyoxal oxidase-related contains similarity to glyoxal oxidase precursor [Phanerochaete chrysosporium] gi|1050302|gb|AAA87594 [At1g75620.1]
A_84_P17464	TREATMENT	90 min col-0 treatment	45 min col-0 control	-0.3788	0.06807	15	5.56	5.41e-05	0.00484461		At3g44520.1	At3g44520.1	esterase/lipase/thioesterase family protein similar to SP|Q02104 Lipase 1 precursor (EC 3.1.1.3) (Triacylglycerol lipase) {Psychrobacter immobilis}; contains Interpro entry IPR000379 [At3g44520.1]
A_84_P516032	TREATMENT	90 min col-0 treatment	45 min col-0 control	-0.6082	0.1095	15	5.55	5.53e-05	0.00493759		At1g06930.1	At1g06930.1	expressed protein ; expression supported by MPSS [At1g06930.1]
A_84_P601609	TREATMENT	90 min col-0 treatment	45 min col-0 control	0.4304	0.07755	15	-5.55	5.55e-05	0.004941		At2g40085.1	At2g40085.1	expressed protein [At2g40085.1]
A_84_P18765	TREATMENT	90 min col-0 treatment	45 min col-0 control	-0.3936	0.07101	15	5.54	5.64e-05	0.00497759		At5g46280.1	At5g46280.1	DNA replication licensing factor, putative similar to SP|Q43704 DNA replication licensing factor MCM3 homolog (Replication origin activator) (ROA protein) {Zea mays}; contains Pfam profile PF00493: MCM2/3/5 family [At5g46280.1]
A_84_P305340	TREATMENT	90 min col-0 treatment	45 min col-0 control	0.3015	0.05439	15	-5.54	5.63e-05	0.00497759		CHR1:018187804-018187745	CHR1:018187804-018187745	Unknown
A_84_P591392	TREATMENT	90 min col-0 treatment	45 min col-0 control	0.3235	0.05835	15	-5.54	5.63e-05	0.00497759		At5g47940.1	At5g47940.1	expressed protein [At5g47940.1]
A_84_P229729	TREATMENT	90 min col-0 treatment	45 min col-0 control	-0.6694	0.121	15	5.53	5.73e-05	0.00504245		At2g20142.1	At2g20142.1	expressed protein [At2g20142.1]
A_84_P14861	TREATMENT	90 min col-0 treatment	45 min col-0 control	-0.5223	0.09444	15	5.53	5.76e-05	0.00505428		At1g19440.1	At1g19440.1	very-long-chain fatty acid condensing enzyme, putative similar to GB:AAD37122 from [Arabidopsis thaliana] [At1g19440.1]
A_84_P12761	TREATMENT	90 min col-0 treatment	45 min col-0 control	-0.9525	0.1724	15	5.52	5.83e-05	0.00510105		At3g50130.1	At3g50130.1	expressed protein ; expression supported by MPSS [At3g50130.1]
A_84_P73724	TREATMENT	90 min col-0 treatment	45 min col-0 control	-0.5015	0.09093	15	5.52	5.93e-05	0.00517372		At5g57035.1	At5g57035.1	protein kinase family protein contains Pfam profile: PF00069 Eukaryotic protein kinase domain [At5g57035.1]
A_84_P18194	TREATMENT	90 min col-0 treatment	45 min col-0 control	0.3887	0.07062	15	-5.5	6.06e-05	0.00527208		At2g47600.1	At2g47600.1	magnesium/proton exchanger (MHX1) identical to magnesium/proton exchanger AtMHX [Arabidopsis thaliana] gi|6492237|gb|AAF14229; Ca2+:Cation Antiporter (CaCA) Family member PMID:11500563 [At2g47600.1]
A_84_P101426	TREATMENT	90 min col-0 treatment	45 min col-0 control	0.2322	0.04228	15	-5.49	6.19e-05	0.00533954		At3g02860.1	At3g02860.1	expressed protein [At3g02860.1]
A_84_P12864	TREATMENT	90 min col-0 treatment	45 min col-0 control	0.3153	0.05738	15	-5.49	6.16e-05	0.00533954		At4g13640.1	At4g13640.1	myb family transcription factor contains Pfam profile: PF00249 myb-like DNA-binding domain [At4g13640.1]
A_84_P12258	TREATMENT	90 min col-0 treatment	45 min col-0 control	0.3542	0.06449	15	-5.49	6.19e-05	0.00533954		At1g28150.1	At1g28150.1	expressed protein [At1g28150.1]
A_84_P21342	TREATMENT	90 min col-0 treatment	45 min col-0 control	0.2086	0.03801	15	-5.49	6.23e-05	0.0053589		At4g02610.1	At4g02610.1	tryptophan synthase, alpha subunit, putative similar to A. thaliana tryptophan synthase alpha chain (EC 4.2.1.20), GenBank accession number U18993 (gi:619753) [At4g02610.1]
A_84_P586318	TREATMENT	90 min col-0 treatment	45 min col-0 control	0.5444	0.09931	15	-5.48	6.32e-05	0.00542105		At1g65845.1	At1g65845.1	expressed protein [Arabidopsis thaliana] [At1g65845.1]
A_84_P540904	TREATMENT	90 min col-0 treatment	45 min col-0 control	-0.3414	0.06236	15	5.47	6.41e-05	0.00548285		At1g22882.1	At1g22882.1	expressed protein [At1g22882.1]
A_84_P23478	TREATMENT	90 min col-0 treatment	45 min col-0 control	-1.1737	0.2147	15	5.47	6.5e-05	0.0055443		At5g41750.1	At5g41750.1	disease resistance protein (TIR-NBS-LRR class), putative domain signature TIR-NBS-LRR exists, suggestive of a disease resistance protein. [At5g41750.1]
A_84_P19743	TREATMENT	90 min col-0 treatment	45 min col-0 control	-0.9967	0.1825	15	5.46	6.57e-05	0.00556589		At5g55250.1	At5g55250.1	S-adenosyl-L-methionine:carboxyl methyltransferase family protein similar to SAM:jasmonic acid carboxyl methyltransferase (JMT)[GI:13676829] and to SAM:benzoic acid carboxyl methyltransferase (BAMT)[GI:9789277][Antirrhinum majus] [At5g55250.1]
A_84_P23571	TREATMENT	90 min col-0 treatment	45 min col-0 control	-0.671	0.1229	15	5.46	6.58e-05	0.00556589		At5g66080.1	At5g66080.1	protein phosphatase 2C family protein / PP2C family protein similar to Ser/Thr protein phosphatase 2C (PP2C6) (GI:15020818) [Arabidopsis thaliana]; similar to protein phosphatase 2C (GI:3608412) [Mesembryanthemum crystallinum]; contains Pfam PF00481 :...
A_84_P582608	TREATMENT	90 min col-0 treatment	45 min col-0 control	-0.5289	0.09685	15	5.46	6.57e-05	0.00556589		At1g13540.1	At1g13540.1	expressed protein [At1g13540.1]
A_84_P21159	TREATMENT	90 min col-0 treatment	45 min col-0 control	-0.5591	0.1024	15	5.46	6.61e-05	0.00556888		At3g04010.1	At3g04010.1	glycosyl hydrolase family 17 protein similar to beta-1,3-glucanase GB:S12402 [Nicotiana sp], GB:CAA03908 [Citrus sinensis], GB:S44364 [Lycopersicon esculentum] [At3g04010.1]
A_84_P255410	TREATMENT	90 min col-0 treatment	45 min col-0 control	-0.3203	0.05869	15	5.46	6.62e-05	0.00556888		At2g43340.1	At2g43340.1	expressed protein [At2g43340.1]
A_84_P20973	TREATMENT	90 min col-0 treatment	45 min col-0 control	-0.7586	0.1391	15	5.45	6.65e-05	0.00557875		At1g25450.1	At1g25450.1	very-long-chain fatty acid condensing enzyme, putative nearly identical to fatty acid condensing enzyme CUT1 GI:5001734 from [Arabidopsis thaliana] [At1g25450.1]
A_84_P84809	TREATMENT	90 min col-0 treatment	45 min col-0 control	0.2162	0.03964	15	-5.45	6.67e-05	0.00558019		At4g17540.1	At4g17540.1	expressed protein [At4g17540.1]
A_84_P522490	TREATMENT	90 min col-0 treatment	45 min col-0 control	-0.5372	0.09859	15	5.45	6.73e-05	0.00561501		At2g24040.1	At2g24040.1	hydrophobic protein, putative / low temperature and salt responsive protein, putative similar to SP|Q9ZNQ7 Hydrophobic protein RCI2A (Low temperature and salt responsive protein LTI6A) {Arabidopsis thaliana}; contains Pfam profile PF01679:...
A_84_P185914	TREATMENT	90 min col-0 treatment	45 min col-0 control	0.2821	0.05183	15	-5.44	6.8e-05	0.00565795		At2g17020.1	At2g17020.1	F-box family protein (FBL10) contains similarity to F-box protein Partner of Paired GI:10441427 from [Drosophila melanogaster] [At2g17020.1]
A_84_P710299	TREATMENT	90 min col-0 treatment	45 min col-0 control	-0.8255	0.1518	15	5.44	6.84e-05	0.00567577		CHR5:021668346-021668405	CHR5:021668346-021668405	Unknown
A_84_P20770	TREATMENT	90 min col-0 treatment	45 min col-0 control	-1.1191	0.2059	15	5.44	6.89e-05	0.00570176		At2g17890.1	At2g17890.1	calcium-dependent protein kinase family protein / CDPK family protein contains Pfam domains, PF00069: Protein kinase domain and PF00036: EF hand [At2g17890.1]
A_84_P23220	TREATMENT	90 min col-0 treatment	45 min col-0 control	-0.846	0.1559	15	5.43	7.01e-05	0.00576249		At3g63380.1	At3g63380.1	calcium-transporting ATPase, plasma membrane-type, putative / Ca(2+)-ATPase, putative (ACA12) identical to SP|Q9LY77 Potential calcium-transporting ATPase 12, plasma membrane-type (EC 3.6.3.8) (Ca(2+)-ATPase isoform 12) {Arabidopsis thaliana}; similar...
A_84_P16399	TREATMENT	90 min col-0 treatment	45 min col-0 control	-0.6763	0.1246	15	5.43	7.01e-05	0.00576249		At1g53730.1	At1g53730.1	leucine-rich repeat transmembrane protein kinase, putative similar to GI:3360289 from [Zea mays] (Plant Mol. Biol. 37 (5), 749-761 (1998)) [At1g53730.1]
A_84_P18003	TREATMENT	90 min col-0 treatment	45 min col-0 control	0.8743	0.1611	15	-5.43	7.02e-05	0.00576249		At1g04620.1	At1g04620.1	coenzyme F420 hydrogenase family / dehydrogenase, beta subunit family contains Pfam PF04432: Coenzyme F420 hydrogenase/dehydrogenase, beta domain; similar to Coenzyme F420 hydrogenase beta subunit (SP:Q00391) {Methanobacterium thermoautotrophicum}...
A_84_P16983	TREATMENT	90 min col-0 treatment	45 min col-0 control	-0.5799	0.107	15	5.42	7.07e-05	0.0057725		At1g56630.1	At1g56630.1	lipase class 3 family protein contains Pfam profile PF01764: Lipase [At1g56630.1]
A_84_P707722	TREATMENT	90 min col-0 treatment	45 min col-0 control	0.4462	0.0823	15	-5.42	7.07e-05	0.0057725		CHR3:023212329-023212270	CHR3:023212329-023212270	Unknown
A_84_P118802	TREATMENT	90 min col-0 treatment	45 min col-0 control	-0.5052	0.09322	15	5.42	7.11e-05	0.00578968		At3g05920.1	At3g05920.1	heavy-metal-associated domain-containing protein contains Pfam profile PF00403: Heavy-metal-associated domain [At3g05920.1]
A_84_P19559	TREATMENT	90 min col-0 treatment	45 min col-0 control	-0.9831	0.1822	15	5.4	7.42e-05	0.00597835		At1g15010.1	At1g15010.1	expressed protein [At1g15010.1]
A_84_P12058	TREATMENT	90 min col-0 treatment	45 min col-0 control	-0.9509	0.1761	15	5.4	7.39e-05	0.00597835		At5g08640.1	At5g08640.1	flavonol synthase 1 (FLS1) identical to SP|Q96330; contains PF03171 2OG-Fe(II) oxygenase superfamily [At5g08640.1]
A_84_P19443	TREATMENT	90 min col-0 treatment	45 min col-0 control	-0.7763	0.1439	15	5.4	7.42e-05	0.00597835		At4g01010.1	At4g01010.1	cyclic nucleotide-regulated ion channel, putative (CNGC13) similar to CaM-regulated potassium ion channel (ACBK1) GI:8515883 from [Arabidopsis thaliana] [At4g01010.1]
A_84_P18016	TREATMENT	90 min col-0 treatment	45 min col-0 control	0.2987	0.05532	15	-5.4	7.38e-05	0.00597835		At1g70360.1	At1g70360.1	F-box protein-related [At1g70360.1]
A_84_P214268	TREATMENT	90 min col-0 treatment	45 min col-0 control	-0.504	0.09346	15	5.39	7.47e-05	0.00599505		At2g15350.1	At2g15350.1	xyloglucan fucosyltransferase, putative (FUT10) identical to SP|Q9SJP6 Putative fucosyltransferase 10 (EC 2.4.1.-) (AtFUT10) (Fragment) {Arabidopsis thaliana}; similar to xyloglucan fucosyltransferase GI:5231145 from [Arabidopsis thaliana] [At2g15350.1]
A_84_P12325	TREATMENT	90 min col-0 treatment	45 min col-0 control	-0.5008	0.09288	15	5.39	7.48e-05	0.00599505		At1g70230.1	At1g70230.1	expressed protein [At1g70230.1]
A_84_P521345	TREATMENT	90 min col-0 treatment	45 min col-0 control	0.5164	0.09584	15	-5.39	7.54e-05	0.00602732		At1g05690.1	At1g05690.1	TAZ zinc finger family protein / BTB/POZ domain-containing protein contains Pfam PF00651 : BTB/POZ domain; contains Pfam PF02135 : TAZ zinc finger; similar to p300/CBP acetyltransferase-related protein (GI:12597461) [Arabidopsis thaliana]; similar to...
A_84_P502380	TREATMENT	90 min col-0 treatment	45 min col-0 control	-1.1771	0.2189	15	5.38	7.68e-05	0.0060757		At4g19970.1	At4g19970.1	expressed protein similar to GI:2827651, GI:7527728, GI:4406788, GI:6063544, GI:10764853, GI:10764852 from [Arabidopsis thaliana]; predicted protein PATCHX:E326963 [At4g19970.1]
A_84_P172771	TREATMENT	90 min col-0 treatment	45 min col-0 control	-0.3809	0.07082	15	5.38	7.68e-05	0.0060757		At5g06930.1	At5g06930.1	expressed protein [At5g06930.1]
A_84_P610685	TREATMENT	90 min col-0 treatment	45 min col-0 control	-0.3459	0.06433	15	5.38	7.69e-05	0.0060757		At3g59670.1	At3g59670.1	expressed protein ; expression supported by MPSS [At3g59670.1]
A_84_P291764	TREATMENT	90 min col-0 treatment	45 min col-0 control	-0.1996	0.0371	15	5.38	7.65e-05	0.0060757		At5g21105.1	At5g21105.1	L-ascorbate oxidase, putative similar to L-ascorbate oxidase from {Nicotiana tabacum} SP|Q40588, {Cucurbita pepo var. melopepo} SP|P37064; contains Pfam profile PF00394: Multicopper oxidase; supported by cDNA gi_15215753_gb_AY050406.1_; A false intron...
A_84_P16114	TREATMENT	90 min col-0 treatment	45 min col-0 control	1.7745	0.33	15	-5.38	7.7e-05	0.0060757		At1g09350.1	At1g09350.1	galactinol synthase, putative contains Pfam profile: PF01501 glycosyl transferase family 8 [At1g09350.1]
A_84_P16554	TREATMENT	90 min col-0 treatment	45 min col-0 control	-0.6259	0.1165	15	5.37	7.74e-05	0.00609152		At3g53010.1	At3g53010.1	expressed protein weak partial homology with single predicted protein kinase, Arabidopsis thaliana [At3g53010.1]
A_84_P22488	TREATMENT	90 min col-0 treatment	45 min col-0 control	0.2494	0.04642	15	-5.37	7.76e-05	0.00609156		At5g19030.1	At5g19030.1	RNA recognition motif (RRM)-containing protein low similarity to Cold-inducible RNA-binding protein (Glycine-rich RNA-binding protein CIRP) from {Homo sapiens} SP|Q14011, {Rattus norvegicus} SP|Q61413,{Xenopus laevis} SP|O93235; contains InterPro...
A_84_P13015	TREATMENT	90 min col-0 treatment	45 min col-0 control	-0.4517	0.08414	15	5.37	7.82e-05	0.00612292		At5g12910.1	At5g12910.1	histone H3, putative similar to histone H3 from Mus musculus GI:51301, Gallus gallus GI:211859, Medicago sativa GI:166384, Pisum sativum SP|P02300; contains Pfam profile PF00125 Core histone H2A/H2B/H3/H4 [At5g12910.1]
A_84_P510925	TREATMENT	90 min col-0 treatment	45 min col-0 control	-0.437	0.08146	15	5.36	7.89e-05	0.006154		At2g13820.2	At2g13820.2	protease inhibitor/seed storage/lipid transfer protein (LTP) family protein contains Pfam protease inhibitor/seed storage/LTP family domain PF00234 [At2g13820.2]
A_84_P11685	TREATMENT	90 min col-0 treatment	45 min col-0 control	0.421	0.0785	15	-5.36	7.9e-05	0.006154		At3g01480.1	At3g01480.1	peptidyl-prolyl cis-trans isomerase, putative / cyclophilin, putative / rotamase, putative similar to peptidyl-prolyl cis-trans isomerase, chloroplast precursor (40 kDa thylakoid lumen PPIase, 40 kDa thylakoid lumen rotamase) [Spinacia oleracea]...
A_84_P738888	TREATMENT	90 min col-0 treatment	45 min col-0 control	-1.8511	0.3458	15	5.35	8.05e-05	0.00616083		BU917434	BU917434	JKHR01E06 Size-selected small cDNAs of Arabidopsis thaliana Arabidopsis thaliana cDNA clone JKHR01E06, mRNA sequence [BU917434]
A_84_P22732	TREATMENT	90 min col-0 treatment	45 min col-0 control	-1.3968	0.2609	15	5.35	8.03e-05	0.00616083		At1g08860.1	At1g08860.1	copine, putative Similar to BONZAI1 [Arabidopsis thaliana] GI:15487382; contains Pfam profile PF00168: C2 domain [At1g08860.1]
A_84_P16471	TREATMENT	90 min col-0 treatment	45 min col-0 control	-1.2501	0.2332	15	5.36	7.95e-05	0.00616083		At3g18450.1	At3g18450.1	expressed protein similar to PGPS/D12 [Petunia x hybrida] GI:4105794; contains Pfam profile PF04749: Protein of unknown function, DUF614 [At3g18450.1]
A_84_P185874	TREATMENT	90 min col-0 treatment	45 min col-0 control	-1.1343	0.2117	15	5.36	7.98e-05	0.00616083		At4g11170.1	At4g11170.1	disease resistance protein (TIR-NBS-LRR class), putative domain signature TIR-NBS-LRR exists, suggestive of a disease resistance protein. [At4g11170.1]
A_84_P18709	TREATMENT	90 min col-0 treatment	45 min col-0 control	-0.3404	0.06356	15	5.36	8e-05	0.00616083		At5g23300.1	At5g23300.1	dihydroorotate dehydrogenase, mitochondrial / dihydroorotate oxidase / DHOdehase (PYRD) nearly identical to SP|P32746 Dihydroorotate dehydrogenase, mitochondrial precursor (EC 1.3.3.1) (Dihydroorotate oxidase) (DHOdehase) {Arabidopsis thaliana};...
A_84_P92159	TREATMENT	90 min col-0 treatment	45 min col-0 control	0.272	0.05077	15	-5.36	7.99e-05	0.00616083		At2g20210.1	At2g20210.1	leucine-rich repeat family protein contains leucine rich repeat (LRR) domains, Pfam:PF00560 [At2g20210.1]
A_84_P100756	TREATMENT	90 min col-0 treatment	45 min col-0 control	0.3789	0.07077	15	-5.35	8.04e-05	0.00616083		TC257168	TC257168	Q9LFY6 (Q9LFY6) T7N9.5, partial (24%) [TC257168]
A_84_P20320	TREATMENT	90 min col-0 treatment	45 min col-0 control	-1.2492	0.2334	15	5.35	8.08e-05	0.00616833		At3g48920.1	At3g48920.1	myb family transcription factor (MYB45) similar to MybHv33 GI:456214 from [Hordeum vulgare]; contains PFAM profile: myb DNA binding domain PF00249 [At3g48920.1]
A_84_P184974	TREATMENT	90 min col-0 treatment	45 min col-0 control	0.3817	0.07144	15	-5.34	8.21e-05	0.00625194		At5g18140.1	At5g18140.1	DNAJ heat shock N-terminal domain-containing protein similar to DnaJ protein Tid-1 [Homo sapiens] GI:17066575; contains Pfam profile PF00226 DnaJ domain [At5g18140.1]
A_84_P18703	TREATMENT	90 min col-0 treatment	45 min col-0 control	0.4455	0.08353	15	-5.33	8.35e-05	0.00634274		At5g18680.1	At5g18680.1	F-box family protein / tubby family protein similar to phosphodiesterase (GI:467578) [Mus musculus]; similar to Chain A, C-Terminal Domain Of Mouse Brain Tubby Protein (GI:6730158) [Mus musculus]; contains Pfam PF00646: F-box domain and Pfam PF01167:...
A_84_P15936	TREATMENT	90 min col-0 treatment	45 min col-0 control	-0.2283	0.04282	15	5.33	8.38e-05	0.00634973		At5g48460.1	At5g48460.1	fimbrin-like protein, putative strong similarity to fimbrin-like protein AtFim2 [Arabidopsis thaliana] GI:2737926; contains Pfam profile PF00307: Calponin homology (CH) domain [At5g48460.1]
A_84_P14198	TREATMENT	90 min col-0 treatment	45 min col-0 control	0.772	0.1448	15	-5.33	8.41e-05	0.00635669		At1g67400.1	At1g67400.1	phagocytosis and cell motility protein ELMO1-related contains weak similarity to ELMO1 [Mus musculus] gi|16118551|gb|AAL14464 [At1g67400.1]
A_84_P19362	TREATMENT	90 min col-0 treatment	45 min col-0 control	1.1056	0.2075	15	-5.33	8.44e-05	0.00636361		At3g46090.1	At3g46090.1	zinc finger (C2H2 type) family protein (ZAT7) identical to zinc finger protein ZAT7 [Arabidopsis thaliana] gi|1418341|emb|CAA67234; contains Pfam domain, PF00096: Zinc finger, C2H2 type [At3g46090.1]
A_84_P19158	TREATMENT	90 min col-0 treatment	45 min col-0 control	0.7321	0.1376	15	-5.32	8.58e-05	0.00645323		At2g41290.1	At2g41290.1	strictosidine synthase family protein similar to strictosidine synthase [Rauvolfia serpentina][SP|P15324]; contains strictosidine synthase domain PF03088 [At2g41290.1]
A_84_P82569	TREATMENT	90 min col-0 treatment	45 min col-0 control	0.3983	0.07495	15	-5.31	8.67e-05	0.00650491		At4g10925.1	At4g10925.1	F-box family protein contains Pfam PF00646: F-box domain [At4g10925.1]
A_84_P727738	TREATMENT	90 min col-0 treatment	45 min col-0 control	-0.3684	0.06938	15	5.31	8.75e-05	0.00653282		BX815104	BX815104	Arabidopsis thaliana Full-length cDNA Complete sequence from clone GSLTLS32ZG11 of Adult vegetative tissue of strain col-0 of Arabidopsis thaliana (thale cress) [BX815104]
A_84_P142059	TREATMENT	90 min col-0 treatment	45 min col-0 control	0.3319	0.06251	15	-5.31	8.74e-05	0.00653282		At5g54930.1	At5g54930.1	AT hook motif-containing protein contains Pfam profile PF02178: AT hook motif [At5g54930.1]
A_84_P11613	TREATMENT	90 min col-0 treatment	45 min col-0 control	1.4982	0.2823	15	-5.31	8.78e-05	0.00653923		At2g34930.1	At2g34930.1	disease resistance family protein contains leucine rich-repeat domains Pfam:PF00560, INTERPRO:IPR001611; similar to Cf-2.1 [Lycopersicon pimpinellifolium] gi|1184075|gb|AAC15779 [At2g34930.1]
A_84_P12091	TREATMENT	90 min col-0 treatment	45 min col-0 control	-0.6029	0.1136	15	5.31	8.81e-05	0.00654349		At5g23400.1	At5g23400.1	disease resistance family protein / LRR family protein similar to disease resistance protein [Lycopersicon esculentum] gi|3894383|gb|AAC78591; contains leucine rich-repeat domain Pfam:PF00560, INTERPRO:IPR001611 [At5g23400.1]
A_84_P14858	TREATMENT	90 min col-0 treatment	45 min col-0 control	-0.4484	0.08455	15	5.3	8.85e-05	0.00654349		At4g16950.1	At4g16950.1	disease resistance protein (TIR-NBS-LRR class), putative domain signature TIR-NBS-LRR exists, suggestive of a disease resistance protein.; closest homolog in Col-0 to RPP5 of clutivar Landsberg erecta. [At4g16950.1]
A_84_P18035	TREATMENT	90 min col-0 treatment	45 min col-0 control	0.5189	0.09783	15	-5.3	8.84e-05	0.00654349		At1g54500.1	At1g54500.1	rubredoxin family protein similar to SP|P00270 Rubredoxin (Rd) {Desulfovibrio gigas}; contains Pfam profile PF00301: Rubredoxin [At1g54500.1]
A_84_P205658	TREATMENT	90 min col-0 treatment	45 min col-0 control	-0.6914	0.1307	15	5.29	9.05e-05	0.00665912		At3g11370.1	At3g11370.1	DC1 domain-containing protein contains Pfam protein PF03107 DC1 domain [At3g11370.1]
A_84_P12598	TREATMENT	90 min col-0 treatment	45 min col-0 control	0.416	0.0786	15	-5.29	9.03e-05	0.00665912		At2g20630.1	At2g20630.1	protein phosphatase 2C, putative / PP2C, putative [At2g20630.1]
A_84_P62430	TREATMENT	90 min col-0 treatment	45 min col-0 control	0.7921	0.1498	15	-5.29	9.1e-05	0.00667981		At5g45350.1	At5g45350.1	proline-rich family protein contains proline rich extensin domains, INTERPRO:IPR002965 [At5g45350.1]
A_84_P173691	TREATMENT	90 min col-0 treatment	45 min col-0 control	-0.8357	0.1581	15	5.28	9.17e-05	0.00671505		At2g44290.1	At2g44290.1	protease inhibitor/seed storage/lipid transfer protein (LTP) family protein (YLS3) similar to lipid transfer protein Picea abies GI:2627141; contains Pfam profile: PF00234: Protease inhibitor/seed storage/LTP family; identical to cDNA YLS3 mRNA for...
A_84_P14317	TREATMENT	90 min col-0 treatment	45 min col-0 control	0.2598	0.04922	15	-5.28	9.26e-05	0.00676474		At1g69830.1	At1g69830.1	alpha-amylase, putative / 1,4-alpha-D-glucan glucanohydrolase, putative similar to SP|P17859 Alpha-amylase precursor (EC 3.2.1.1) (1,4-alpha-D-glucan glucanohydrolase) {Vigna mungo}, alpha-amylase [Malus x domestica] GI:7532799; contains Pfam profile...
A_84_P18909	TREATMENT	90 min col-0 treatment	45 min col-0 control	-0.9197	0.1744	15	5.27	9.34e-05	0.0068069		At1g13310.1	At1g13310.1	expressed protein [At1g13310.1]
A_84_P59370	TREATMENT	90 min col-0 treatment	45 min col-0 control	-0.5616	0.1065	15	5.27	9.37e-05	0.0068125		At5g10410.1	At5g10410.1	epsin N-terminal homology (ENTH) domain-containing protein / clathrin assembly protein-related contains Pfam PF01417: ENTH domain. ENTH (Epsin N-terminal homology) domain; similar to clathrin assembly protein AP180 (GI:6492344) [Xenopus laevis]...
A_84_P723410	TREATMENT	90 min col-0 treatment	45 min col-0 control	-0.7514	0.1428	15	5.26	9.56e-05	0.00693413		CHR3:002385490-002385549	CHR3:002385490-002385549	Unknown
A_84_P14249	TREATMENT	90 min col-0 treatment	45 min col-0 control	0.6431	0.1223	15	-5.26	9.65e-05	0.00698282		At1g36060.1	At1g36060.1	AP2 domain-containing transcription factor, putative similar to AP2 domain transcription factor GI:4567204 from [Arabidopsis thaliana] [At1g36060.1]
A_84_P195034	TREATMENT	90 min col-0 treatment	45 min col-0 control	0.4536	0.08654	15	-5.24	9.94e-05	0.00717567		At5g08340.1	At5g08340.1	riboflavin biosynthesis protein-related contains weak similarity to Riboflavin biosynthesis protein ribF. (Swiss-Prot:P08391) [Escherichia coli O157:H7] [At5g08340.1]
A_84_P16571	TREATMENT	90 min col-0 treatment	45 min col-0 control	-0.9771	0.1867	15	5.23	0.000101	0.0071892		At3g56400.1	At3g56400.1	WRKY family transcription factor DNA-binding protein 4 WRKY4 - Nicotiana tabacum, EMBL:AF193771 [At3g56400.1]
A_84_P212758	TREATMENT	90 min col-0 treatment	45 min col-0 control	-0.6159	0.1177	15	5.23	0.000101	0.0071892		At2g02620.1	At2g02620.1	DC1 domain-containing protein / PHD finger protein-related contains Pfam profiles PF03107: DC1 domain, weak hit to PF00628: PHD-finger [At2g02620.1]
A_84_P20027	TREATMENT	90 min col-0 treatment	45 min col-0 control	0.2007	0.03832	15	-5.24	0.0001	0.0071892		At1g25470.1	At1g25470.1	AP2 domain-containing transcription factor, putative similar to putative AP2 domain transcription factor GI:6553944 from [Arabidopsis thaliana] [At1g25470.1]
A_84_P606869	TREATMENT	90 min col-0 treatment	45 min col-0 control	0.3683	0.0704	15	-5.23	0.000101	0.0071892		At2g16390.1	At2g16390.1	SNF2 domain-containing protein / helicase domain-containing protein low similarity to RAD54 [Drosophila melanogaster] GI:1765914; contains Pfam profiles PF00271: Helicase conserved C-terminal domain, PF00176: SNF2 family N-terminal domain [At2g16390.1]
A_84_P51830	TREATMENT	90 min col-0 treatment	45 min col-0 control	0.412	0.07875	15	-5.23	0.000101	0.0071892		At2g33360.1	At2g33360.1	expressed protein [At2g33360.1]
A_84_P572184	TREATMENT	90 min col-0 treatment	45 min col-0 control	0.5186	0.09912	15	-5.23	0.000101	0.0071892		At2g35200.1	At2g35200.1	expressed protein [At2g35200.1]
A_84_P19878	TREATMENT	90 min col-0 treatment	45 min col-0 control	-0.5375	0.1029	15	5.22	0.000103	0.00729753		At1g64640.1	At1g64640.1	plastocyanin-like domain-containing protein contains InterPro:IPR003245 plastocyanin-like domain [At1g64640.1]
A_84_P96816	TREATMENT	90 min col-0 treatment	45 min col-0 control	0.7465	0.1429	15	-5.22	0.000103	0.00729753		At4g25760.1	At4g25760.1	expressed protein [At4g25760.1]
A_84_P13428	TREATMENT	90 min col-0 treatment	45 min col-0 control	0.2407	0.04614	15	-5.22	0.000104	0.00733435		At1g31860.1	At1g31860.1	histidine biosynthesis bifunctional protein (HISIE) identical to histidine biosynthesis bifunctional protein hisIE, chloroplast [precursor] SP: O82768 from [Arabidopsis thaliana]; identical to cDNA phosphoribosyl-ATP pyrophosphohydrolase GI:3461883...
A_84_P20551	TREATMENT	90 min col-0 treatment	45 min col-0 control	1.1255	0.2156	15	-5.22	0.000104	0.00733435		At5g03860.1	At5g03860.1	malate synthase, putative strong similarity to glyoxysomal malate synthase from Brassica napus [SP|P13244] [At5g03860.1]
A_84_P256150	TREATMENT	90 min col-0 treatment	45 min col-0 control	0.1659	0.03181	15	-5.21	0.000105	0.00737083		At5g12120.1	At5g12120.1	ubiquitin-associated (UBA)/TS-N domain-containing protein contains Pfam profile PF00627: UBA/TS-N domain [At5g12120.1]
A_84_P13573	TREATMENT	90 min col-0 treatment	45 min col-0 control	0.5844	0.1121	15	-5.22	0.000105	0.00737083		At3g07650.1	At3g07650.1	zinc finger (B-box type) family protein similar to zinc finger protein GB:BAA33206 [Oryza sativa] [At3g07650.1]
A_84_P23758	TREATMENT	90 min col-0 treatment	45 min col-0 control	0.5025	0.09647	15	-5.21	0.000106	0.00739006		At1g74840.1	At1g74840.1	myb family transcription factor similar to myb-related transcription activator GI:9279717 from [Arabidopsis thaliana] [At1g74840.1]
A_84_P220358	TREATMENT	90 min col-0 treatment	45 min col-0 control	0.9436	0.1811	15	-5.21	0.000106	0.00739006		At5g50610.1	At5g50610.1	hypothetical protein [At5g50610.1]
A_84_P295824	TREATMENT	90 min col-0 treatment	45 min col-0 control	2.9256	0.5614	15	-5.21	0.000106	0.00739006		At3g56970.1	At3g56970.1	basic helix-loop-helix (bHLH) family protein [At3g56970.1]
A_84_P10747	TREATMENT	90 min col-0 treatment	45 min col-0 control	-0.8328	0.1601	15	5.2	0.000107	0.00742587		At1g53700.1	At1g53700.1	protein kinase, putative similar to cucumber protein kinase CsPK3 [Cucumis sativus] gi|7416109|dbj|BAA93704 [At1g53700.1]
A_84_P295714	TREATMENT	90 min col-0 treatment	45 min col-0 control	0.2849	0.05474	15	-5.2	0.000107	0.00742587		At5g06370.1	At5g06370.1	NC domain-containing protein contains Pfam domain, PF04970: NC domain [At5g06370.1]
A_84_P525609	TREATMENT	90 min col-0 treatment	45 min col-0 control	-0.7212	0.1388	15	5.2	0.000108	0.00747828		At5g35870.1	At5g35870.1	hypothetical protein similar to unknown protein (gb|AAD25831.1) [At5g35870.1]
A_84_P14194	TREATMENT	90 min col-0 treatment	45 min col-0 control	-0.4518	0.08695	15	5.2	0.000109	0.00753044		At1g04040.1	At1g04040.1	acid phosphatase class B family protein similar to SP|P15490 STEM 28 kDa glycoprotein precursor (Vegetative storage protein A) {Glycine max}, acid phosphatase [Glycine max] GI:3341443; contains Pfam profile PF03767: HAD superfamily (subfamily IIIB)...
A_84_P13877	TREATMENT	90 min col-0 treatment	45 min col-0 control	-0.4407	0.08493	15	5.19	0.00011	0.00753137		At4g33440.1	At4g33440.1	glycoside hydrolase family 28 protein / polygalacturonase (pectinase) family protein weak similarity to SP|P27644 Polygalacturonase (EC 3.2.1.15) (Pectinase) {Agrobacterium tumefaciens}; contains PF00295: Glycosyl hydrolases family 28 [At4g33440.1]
A_84_P603397	TREATMENT	90 min col-0 treatment	45 min col-0 control	0.6206	0.1196	15	-5.19	0.00011	0.00753137		At2g42440.1	At2g42440.1	LOB domain protein 17 / lateral organ boundaries domain protein 17 (LBD17) nearly identical to SP|Q9SLB6 LOB domain protein 17 {Arabidopsis thaliana}; identical to ASYMMETRIC LEAVES2-like protein 15 [Arabidopsis thaliana] GI:19919001 [At2g42440.1]
A_84_P154615	TREATMENT	90 min col-0 treatment	45 min col-0 control	0.828	0.1596	15	-5.19	0.00011	0.00753137		At1g76590.1	At1g76590.1	zinc-binding family protein similar to zinc-binding protein [Pisum sativum] GI:16117799; contains Pfam profile PF04640 : Protein of unknown function, DUF597 [At1g76590.1]
A_84_P16086	TREATMENT	90 min col-0 treatment	45 min col-0 control	1.7741	0.3418	15	-5.19	0.00011	0.00753137		At1g52100.1	At1g52100.1	jacalin lectin family protein similar to myrosinase-binding protein homolog [Arabidopsis thaliana] GI:2997767; contains Pfam profile PF01419 jacalin-like lectin domain; contains non-consensus AG donor splice site at exon3 [At1g52100.1]
A_84_P10597	TREATMENT	90 min col-0 treatment	45 min col-0 control	-0.9831	0.1896	15	5.19	0.000111	0.00756591		At1g27770.2	At1g27770.2	calcium-transporting ATPase 1, plasma membrane-type / Ca(2+)-ATPase isoform 1 (ACA1) / plastid envelope ATPase 1 (PEA1) identical to SP|Q37145 Calcium-transporting ATPase 1, plasma membrane-type (EC 3.6.3.8) (Ca(2+)-ATPase isoform 1) (Plastid envelope...
A_84_P15048	TREATMENT	90 min col-0 treatment	45 min col-0 control	0.412	0.0795	15	-5.18	0.000111	0.00756591		At5g63710.1	At5g63710.1	leucine-rich repeat transmembrane protein kinase, putative [At5g63710.1]
A_84_P538534	TREATMENT	90 min col-0 treatment	45 min col-0 control	-0.4309	0.0832	15	5.18	0.000112	0.00761707		At2g47360.1	At2g47360.1	expressed protein [At2g47360.1]
A_84_P21064	TREATMENT	90 min col-0 treatment	45 min col-0 control	-1.2859	0.2486	15	5.17	0.000113	0.007668		At2g29220.1	At2g29220.1	lectin protein kinase, putative similar to receptor lectin kinase 3 [Arabidopsis thaliana] gi|4100060|gb|AAD00733; contains protein kinase domain, Pfam:PF00069; contains legume lectins alpha and beta domains, Pfam:PF00138 and Pfam:PF00139 [At2g29220.1]
A_84_P546692	TREATMENT	90 min col-0 treatment	45 min col-0 control	0.3516	0.06802	15	-5.17	0.000114	0.00771871		At4g03410.1	At4g03410.1	peroxisomal membrane protein-related contains weak similarity to Swiss-Prot:P42925 22 kDa peroxisomal membrane protein [Mus musculus] [At4g03410.1]
A_84_P15527	TREATMENT	90 min col-0 treatment	45 min col-0 control	-0.2668	0.05165	15	5.16	0.000115	0.00776919		At3g13320.1	At3g13320.1	calcium exchanger (CAX2) almost identical to low affinity calcium antiporter CAX2 (GI:1488267) [Arabidopsis thaliana]; Ca2+:Cation Antiporter (CaCA) Family member PMID:11500563 [At3g13320.1]
A_84_P14834	TREATMENT	90 min col-0 treatment	45 min col-0 control	-0.3137	0.06075	15	5.16	0.000116	0.00780222		At1g48240.1	At1g48240.1	novel plant SNARE 12 (NPSN12) identical to Novel plant SNARE 12 (AtNPSN12) (Swiss-Prot:Q9LNH6) [Arabidopsis thaliana] [At1g48240.1]
A_84_P592224	TREATMENT	90 min col-0 treatment	45 min col-0 control	0.2631	0.05098	15	-5.16	0.000116	0.00780222		At5g23100.1	At5g23100.1	expressed protein contains Pfam profile PF04759: Protein of unknown function, DUF617 [At5g23100.1]
A_84_P735526	TREATMENT	90 min col-0 treatment	45 min col-0 control	-1.1294	0.219	15	5.16	0.000117	0.00785219		CHR1:024345329-024345270	CHR1:024345329-024345270	Unknown
A_84_P78199	TREATMENT	90 min col-0 treatment	45 min col-0 control	-0.5107	0.09912	15	5.15	0.000118	0.00788464		At5g25240.1	At5g25240.1	expressed protein [At5g25240.1]
A_84_P20361	TREATMENT	90 min col-0 treatment	45 min col-0 control	-0.3953	0.07672	15	5.15	0.000118	0.00788464		At3g57920.1	At3g57920.1	squamosa promoter-binding protein, putative similar to squamosa promoter binding protein-like 9 [Arabidopsis thaliana] GI:5931677; contains Pfam profile PF03110: SBP domain [At3g57920.1]
A_84_P52270	TREATMENT	90 min col-0 treatment	45 min col-0 control	0.2296	0.04467	15	-5.14	0.000121	0.00806745		At4g31010.1	At4g31010.1	expressed protein [At4g31010.1]
A_84_P57900	TREATMENT	90 min col-0 treatment	45 min col-0 control	1.844	0.359	15	-5.14	0.000122	0.0081164		At3g56980.1	At3g56980.1	basic helix-loop-helix (bHLH) family protein [At3g56980.1]
A_84_P22313	TREATMENT	90 min col-0 treatment	45 min col-0 control	-0.2689	0.05242	15	5.13	0.000123	0.00812979		At4g11570.1	At4g11570.1	haloacid dehalogenase-like hydrolase family protein similar to genetic modifier [Zea mays] GI:10444400; contains InterPro accession IPR005834: Haloacid dehalogenase-like hydrolase [At4g11570.1]
A_84_P23383	TREATMENT	90 min col-0 treatment	45 min col-0 control	0.242	0.04716	15	-5.13	0.000123	0.00812979		At5g02150.1	At5g02150.1	expressed protein [At5g02150.1]
A_84_P12837	TREATMENT	90 min col-0 treatment	45 min col-0 control	0.567	0.1105	15	-5.13	0.000123	0.00812979		At4g04630.1	At4g04630.1	expressed protein contains Pfam profile PF04520: Protein of unknown function, DUF584 [At4g04630.1]
A_84_P81739	TREATMENT	90 min col-0 treatment	45 min col-0 control	-1.4799	0.2886	15	5.13	0.000124	0.00816056		At5g46900.1	At5g46900.1	protease inhibitor/seed storage/lipid transfer protein (LTP) family protein contains Pfam protease inhibitor/seed storage/LTP family domain PF00234 [At5g46900.1]
A_84_P10041	TREATMENT	90 min col-0 treatment	45 min col-0 control	-0.3609	0.07041	15	5.12	0.000124	0.00816056		At4g20840.1	At4g20840.1	FAD-binding domain-containing protein similar to SP|P30986 reticuline oxidase precursor (Berberine-bridge-forming enzyme) (BBE) (Tetrahydroprotoberberine synthase) [Eschscholzia californica]; contains PF01565 FAD binding domain [At4g20840.1]
A_84_P14936	TREATMENT	90 min col-0 treatment	45 min col-0 control	-1.8165	0.3546	15	5.12	0.000125	0.00819107		At5g26220.1	At5g26220.1	ChaC-like family protein contains Pfam profile: PF04752 ChaC-like protein [At5g26220.1]
A_84_P21618	TREATMENT	90 min col-0 treatment	45 min col-0 control	0.6783	0.1325	15	-5.12	0.000125	0.00819107		At5g50160.1	At5g50160.1	ferric reductase-like transmembrane component family protein contains Pfam profile PF01794: Ferric reductase like transmembrane component [At5g50160.1]
A_84_P535878	TREATMENT	90 min col-0 treatment	45 min col-0 control	1.0209	0.1995	15	-5.12	0.000126	0.00823891		At3g03280.1	At3g03280.1	expressed protein [At3g03280.1]
A_84_P12839	TREATMENT	90 min col-0 treatment	45 min col-0 control	0.2582	0.05052	15	-5.11	0.000128	0.00835181		At1g05970.1	At1g05970.1	expressed protein [At1g05970.1]
A_84_P22915	TREATMENT	90 min col-0 treatment	45 min col-0 control	-0.9368	0.1835	15	5.1	0.000129	0.00839911		At2g46600.1	At2g46600.1	calcium-binding protein, putative similar to EF-hand Ca2+-binding protein CCD1 [Triticum aestivum] GI:9255753 [At2g46600.1]
A_84_P289784	TREATMENT	90 min col-0 treatment	45 min col-0 control	-1.0241	0.2008	15	5.1	0.000131	0.00842159		At1g61840.1	At1g61840.1	DC1 domain-containing protein similar to hypothetical protein GI:3184279 from [Arabidopsis thaliana]; contains Pfam profile PF03107: DC1 domain [At1g61840.1]
A_84_P572262	TREATMENT	90 min col-0 treatment	45 min col-0 control	-0.9361	0.1835	15	5.1	0.00013	0.00842159		At3g10815.1	At3g10815.1	zinc finger (C3HC4-type RING finger) family protein contains Pfam profile PF00097: Zinc finger, C3HC4 type (RING finger) [At3g10815.1]
A_84_P294574	TREATMENT	90 min col-0 treatment	45 min col-0 control	-0.3335	0.06537	15	5.1	0.00013	0.00842159		At5g62440.1	At5g62440.1	expressed protein [At5g62440.1]
A_84_P522314	TREATMENT	90 min col-0 treatment	45 min col-0 control	0.28	0.05493	15	-5.1	0.000131	0.00842159		At1g30450.3	At1g30450.3	cation-chloride cotransporter, putative similar to cation-chloride co-transporter GB:AAC49874 GI:2582381 from [Nicotiana tabacum], Cation-Chloride Cotransporter (CCC) Family Member, PMID:11500563 [At1g30450.3]
A_84_P22585	TREATMENT	90 min col-0 treatment	45 min col-0 control	0.3239	0.06353	15	-5.1	0.000131	0.00842159		At5g56590.1	At5g56590.1	glycosyl hydrolase family 17 protein similar to elicitor inducible chitinase Nt-SubE76 GI:11071974 from [Nicotiana tabacum] [At5g56590.1]
A_84_P12648	TREATMENT	90 min col-0 treatment	45 min col-0 control	0.4422	0.08673	15	-5.1	0.000131	0.00842159		At3g04560.1	At3g04560.1	expressed protein [At3g04560.1]
A_84_P18571	TREATMENT	90 min col-0 treatment	45 min col-0 control	-0.2704	0.05309	15	5.09	0.000132	0.00845029		At4g25630.1	At4g25630.1	fibrillarin 2 (FIB2) identical to fibrillarin 2 GI:9965655 from [Arabidopsis thaliana] [At4g25630.1]
A_84_P269160	TREATMENT	90 min col-0 treatment	45 min col-0 control	0.3365	0.06605	15	-5.09	0.000132	0.00845029		At3g54920.1	At3g54920.1	pectate lyase, putative / powdery mildew susceptibility protein (PMR6) identical to powdery mildew susceptibility protein [Arabidopsis thaliana] GI:22506901; similar to pectate lyase 2 GP:6606534 from [Musa acuminata] [At3g54920.1]
A_84_P13850	TREATMENT	90 min col-0 treatment	45 min col-0 control	0.4813	0.09454	15	-5.09	0.000133	0.0084965		At4g27260.1	At4g27260.1	auxin-responsive GH3 family protein similar to auxin-responsive GH3 product [Glycine max] GI:18591; contains Pfam profile PF03321: GH3 auxin-responsive promoter [At4g27260.1]
A_84_P519106	TREATMENT	90 min col-0 treatment	45 min col-0 control	0.2496	0.04908	15	-5.09	0.000134	0.00852471		At3g26750.1	At3g26750.1	expressed protein [At3g26750.1]
A_84_P705136	TREATMENT	90 min col-0 treatment	45 min col-0 control	0.7432	0.1461	15	-5.09	0.000134	0.00852471		CHR3:002443210-002443151	CHR3:002443210-002443151	Unknown
A_84_P123282	TREATMENT	90 min col-0 treatment	45 min col-0 control	0.2733	0.05377	15	-5.08	0.000135	0.0085527		At1g06240.1	At1g06240.1	expressed protein contains Pfam domain, PF04305: Protein of unknown function (DUF455) [At1g06240.1]
A_84_P15206	TREATMENT	90 min col-0 treatment	45 min col-0 control	0.4125	0.08117	15	-5.08	0.000135	0.0085527		At1g16250.1	At1g16250.1	kelch repeat-containing F-box family protein contains Pfam profiles PF01344: Kelch motif, PF00646: F-box domain [At1g16250.1]
A_84_P14242	TREATMENT	90 min col-0 treatment	45 min col-0 control	-0.6283	0.1237	15	5.08	0.000136	0.00859821		At1g79330.1	At1g79330.1	latex-abundant protein, putative (AMC6) / caspase family protein similar to latex-abundant protein [Hevea brasiliensis] gb:AAD13216; contains Pfam domain, PF00656: ICE-like protease (caspase) p20 domain [At1g79330.1]
A_84_P21246	TREATMENT	90 min col-0 treatment	45 min col-0 control	-0.5472	0.1081	15	5.06	0.00014	0.00879646		At3g43960.1	At3g43960.1	cysteine proteinase, putative contains similarity to cysteine proteinase RD21A (thiol protease) GI:435619, SP:P43297 from [Arabidopsis thaliana] [At3g43960.1]
A_84_P10192	TREATMENT	90 min col-0 treatment	45 min col-0 control	-0.2695	0.05324	15	5.06	0.00014	0.00879646		At5g18400.1	At5g18400.1	expressed protein contains Pfam profile PF05093: Protein of unknown function (DUF689) [At5g18400.1]
A_84_P607832	TREATMENT	90 min col-0 treatment	45 min col-0 control	0.2396	0.04731	15	-5.07	0.00014	0.00879646		At2g41150.1	At2g41150.1	expressed protein an isoform contains a GA donor splice site supported by FL-cDNA alignment which truncates the ORF. [At2g41150.1]
A_84_P14505	TREATMENT	90 min col-0 treatment	45 min col-0 control	-0.9415	0.1862	15	5.06	0.000142	0.00881332		At2g32140.1	At2g32140.1	disease resistance protein (TIR class), putative domain signature TIR exists, suggestive of a disease resistance protein. [At2g32140.1]
A_84_P18639	TREATMENT	90 min col-0 treatment	45 min col-0 control	-0.5961	0.1179	15	5.06	0.000142	0.00881332		At4g16270.1	At4g16270.1	peroxidase 40 (PER40) (P40) identical to SP|O23474 Peroxidase 40 precursor (EC 1.11.1.7) (Atperox P40) {Arabidopsis thaliana} [At4g16270.1]
A_84_P12358	TREATMENT	90 min col-0 treatment	45 min col-0 control	-0.4402	0.087	15	5.06	0.000141	0.00881332		At1g30620.1	At1g30620.1	UDP-D-xylose 4-epimerase, putative (MUR4) similar to SP|P55180 UDP-glucose 4-epimerase (EC 5.1.3.2) from Bacillus subtilis, GI:3021357 UDP-galactose 4-epimerase from Cyamopsis tetragonoloba; contains Pfam profile PF01370 NAD dependent...
A_84_P16180	TREATMENT	90 min col-0 treatment	45 min col-0 control	-0.4057	0.08025	15	5.06	0.000142	0.00881332		At1g11050.1	At1g11050.1	protein kinase family protein contains protein kinase domain, Pfam:PF00069 [At1g11050.1]
A_84_P23952	TREATMENT	90 min col-0 treatment	45 min col-0 control	-0.3549	0.07015	15	5.06	0.000141	0.00881332		At1g07420.1	At1g07420.1	sterol 4-alpha-methyl-oxidase 2 (SMO2) identical to sterol 4-alpha-methyl-oxidase GI:16973471 from [Arabidopsis thaliana]; identical to cDNA sterol 4-alpha-methyl-oxidase GI:16973470 [At1g07420.1]
A_84_P16569	TREATMENT	90 min col-0 treatment	45 min col-0 control	0.4487	0.08872	15	-5.06	0.000142	0.00881332		At3g56010.1	At3g56010.1	expressed protein [At3g56010.1]
A_84_P17373	TREATMENT	90 min col-0 treatment	45 min col-0 control	-1.053	0.2084	15	5.05	0.000143	0.00883945		At1g53620.1	At1g53620.1	glycine-rich protein [At1g53620.1]
A_84_P606173	TREATMENT	90 min col-0 treatment	45 min col-0 control	0.3659	0.07241	15	-5.05	0.000143	0.00883945		At3g24315.1	At3g24315.1	sec20 family protein contains Pfam PF03908: Sec20 [At3g24315.1]
A_84_P230579	TREATMENT	90 min col-0 treatment	45 min col-0 control	-0.4911	0.09724	15	5.05	0.000144	0.00888328		At3g57070.1	At3g57070.1	glutaredoxin family protein contains Pfam profile PF00462: Glutaredoxin [At3g57070.1]
A_84_P17468	TREATMENT	90 min col-0 treatment	45 min col-0 control	0.4321	0.08563	15	-5.05	0.000145	0.00892694		At3g45650.1	At3g45650.1	proton-dependent oligopeptide transport (POT) family protein contains Pfam profile: PF00854 POT family [At3g45650.1]
A_84_P293514	TREATMENT	90 min col-0 treatment	45 min col-0 control	0.3067	0.06081	15	-5.04	0.000146	0.00897042		At5g13460.1	At5g13460.1	calmodulin-binding family protein low similarity to SF16 protein [Helianthus annuus] GI:560150; contains Pfam profile PF00612: IQ calmodulin-binding motif [At5g13460.1]
A_84_P223829	TREATMENT	90 min col-0 treatment	45 min col-0 control	-0.9258	0.1838	15	5.04	0.000147	0.00899566		At2g44670.1	At2g44670.1	senescence-associated protein-related similar to senescence-associated protein SAG102 (GI:22331931) [Arabidopsis thaliana]; [At2g44670.1]
A_84_P157085	TREATMENT	90 min col-0 treatment	45 min col-0 control	0.5021	0.09967	15	-5.04	0.000147	0.00899566		At3g19150.1	At3g19150.1	kip-related protein 6 (KRP6) / cyclin-dependent kinase inhibitor 6 (ICK6) identical to cyclin-dependent kinase inhibitor 6 (krp6) [Arabidopsis thaliana] GI:14422295 [At3g19150.1]
A_84_P23219	TREATMENT	90 min col-0 treatment	45 min col-0 control	-0.3271	0.06495	15	5.04	0.000148	0.00903874		At3g63120.1	At3g63120.1	cyclin family protein similar to cyclin 2 [Trypanosoma brucei] GI:7339572, cyclin 6 [Trypanosoma cruzi] GI:12005317; contains Pfam profile PF00134: Cyclin, N-terminal domain [At3g63120.1]
A_84_P90109	TREATMENT	90 min col-0 treatment	45 min col-0 control	-0.574	0.1141	15	5.03	0.00015	0.00912439		At3g05800.1	At3g05800.1	expressed protein [At3g05800.1]
A_84_P720832	TREATMENT	90 min col-0 treatment	45 min col-0 control	-0.3634	0.07227	15	5.03	0.00015	0.00912439		CHR2:001575683-001575742	CHR2:001575683-001575742	Unknown
A_84_P521598	TREATMENT	90 min col-0 treatment	45 min col-0 control	1.195	0.2378	15	-5.03	0.000151	0.00916696		At2g22760.1	At2g22760.1	basic helix-loop-helix (bHLH) family protein contains Pfam profile: PF00010 helix-loop-helix DNA-binding domain [At2g22760.1]
A_84_P11287	TREATMENT	90 min col-0 treatment	45 min col-0 control	-0.8473	0.1687	15	5.02	0.000152	0.00917296		At5g15600.1	At5g15600.1	expressed protein [At5g15600.1]
A_84_P558730	TREATMENT	90 min col-0 treatment	45 min col-0 control	0.1906	0.03797	15	-5.02	0.000152	0.00917296		At1g71790.1	At1g71790.1	F-actin capping protein beta subunit family protein contains Pfam profile: PF01115 F-actin capping protein, beta subunit [At1g71790.1]
A_84_P575740	TREATMENT	90 min col-0 treatment	45 min col-0 control	0.5134	0.1022	15	-5.02	0.000152	0.00917296		At2g35550.1	At2g35550.1	expressed protein [At2g35550.1]
A_84_P20467	TREATMENT	90 min col-0 treatment	45 min col-0 control	-0.3998	0.07967	15	5.02	0.000153	0.00921509		At4g26470.1	At4g26470.1	calcium-binding EF hand family protein low similarity to SP|P06787 Calmodulin {Saccharomyces cerevisiae}; contains INTERPRO:IPR002048 calcium-binding EF-hand domain [At4g26470.1]
A_84_P21462	TREATMENT	90 min col-0 treatment	45 min col-0 control	-1.0155	0.2025	15	5.01	0.000154	0.00925706		At4g38560.1	At4g38560.1	expressed protein [At4g38560.1]
A_84_P16247	TREATMENT	90 min col-0 treatment	45 min col-0 control	-1.1523	0.2299	15	5.01	0.000155	0.00929887		At1g12610.1	At1g12610.1	DRE-binding protein, putative / CRT/DRE-binding factor, putative similar to DREB1A GI:3738224 from [Arabidopsis thaliana] and to transcriptional activator CBF1 GI:1899058 from [Arabidopsis thaliana [At1g12610.1]
A_84_P87299	TREATMENT	90 min col-0 treatment	45 min col-0 control	-0.7045	0.1407	15	5.01	0.000156	0.00934051		At3g59370.1	At3g59370.1	expressed protein hypothetical protein F12F1.4 - Arabidopsis thaliana, EMBL:AC002131 [At3g59370.1]
A_84_P16038	TREATMENT	90 min col-0 treatment	45 min col-0 control	0.1977	0.03953	15	-5	0.000158	0.00944175		At1g28140.1	At1g28140.1	expressed protein contains similarity to cytochrome oxidase I GI:1289267 from (Xantholinus sp.) [At1g28140.1]
A_84_P585407	TREATMENT	90 min col-0 treatment	45 min col-0 control	-0.3958	0.07919	15	5	0.000159	0.00946446		At1g58520.1	At1g58520.1	early-responsive to dehydration protein-related / ERD protein-related low similarity to ERD4 protein (early-responsive to dehydration stress) [Arabidopsis thaliana] GI:15375406; contains Pfam profile PF02714: Domain of unknown function DUF221...
A_84_P587896	TREATMENT	90 min col-0 treatment	45 min col-0 control	-0.3376	0.06752	15	5	0.000159	0.00946446		At1g05420.1	At1g05420.1	ovate protein-related contains TIGRFAM TIGR01568 : uncharacterized plant-specific domain TIGR01568 [At1g05420.1]
A_84_P15883	TREATMENT	90 min col-0 treatment	45 min col-0 control	-0.8491	0.17	15	4.99	0.00016	0.009487		At5g26920.1	At5g26920.1	calmodulin-binding protein similar to calmodulin-binding protein TCB60 GI:1698548 from [Nicotiana tabacum] [At5g26920.1]
A_84_P573466	TREATMENT	90 min col-0 treatment	45 min col-0 control	-0.3311	0.06627	15	5	0.00016	0.009487		At5g10850.1	At5g10850.1	expressed protein [At5g10850.1]
A_84_P18226	TREATMENT	90 min col-0 treatment	45 min col-0 control	-1.3903	0.2786	15	4.99	0.000161	0.00949101		At2g29250.1	At2g29250.1	lectin protein kinase, putative similar to receptor lectin kinase 3 [Arabidopsis thaliana] gi|4100060|gb|AAD00733; contains protein kinase domain, Pfam:PF00069; contains legume lectins alpha and beta domains, Pfam:PF00138 and Pfam:PF00139 [At2g29250.1]
A_84_P17124	TREATMENT	90 min col-0 treatment	45 min col-0 control	-0.6972	0.1397	15	4.99	0.000161	0.00949101		At1g53230.1	At1g53230.1	TCP family transcription factor 3 (TCP3) identical to transcription factor 3 (TCP3) [Arabidopsis thaliana] (GI:3243274); similar to flower development protein cycloidea (cyc3) GI:6358611 from [Misopates orontium] [At1g53230.1]
A_84_P551674	TREATMENT	90 min col-0 treatment	45 min col-0 control	0.3432	0.06873	15	-4.99	0.000161	0.00949101		At2g01100.3	At2g01100.3	expressed protein [At2g01100.3]
A_84_P15863	TREATMENT	90 min col-0 treatment	45 min col-0 control	-0.3953	0.07925	15	4.99	0.000162	0.00949497		At5g18270.1	At5g18270.1	no apical meristem (NAM) family protein contains Pfam PF02365 : No apical meristem (NAM) protein; similar to cup-shaped cotyledon CUC2 (GI:1944132) [Arabidopsis thaliana] [At5g18270.1]
A_84_P22102	TREATMENT	90 min col-0 treatment	45 min col-0 control	-0.2874	0.0576	15	4.99	0.000162	0.00949497		At1g01430.1	At1g01430.1	expressed protein similar to hypothetical protein GB:CAB80917 GI:7267605 from [Arabidopsis thaliana] [At1g01430.1]
A_84_P716933	TREATMENT	90 min col-0 treatment	45 min col-0 control	1.0478	0.2101	15	-4.99	0.000162	0.00949497		BX835149	BX835149	BX835149 Arabidopsis thaliana Flowers and buds Col-0 Arabidopsis thaliana cDNA clone GSLTFB31ZE08 3PRIM, mRNA sequence [BX835149]
A_84_P275770	TREATMENT	90 min col-0 treatment	45 min col-0 control	0.3798	0.07616	15	-4.99	0.000163	0.00951705		At1g12730.1	At1g12730.1	cell division cycle protein-related contains 10 transmembrane domains; similar to PIG-U (GI:27372215) [Rattus norvegicus]; similar to Cell division cycle protein 91-like 1 (CDC91-like 1 protein) (PIG-U) (Swiss-Prot:Q9H490) [Homo sapiens] [At1g12730.1]
A_84_P16581	TREATMENT	90 min col-0 treatment	45 min col-0 control	0.3915	0.07854	15	-4.99	0.000163	0.00951705		At3g59100.1	At3g59100.1	glycosyl transferase family 48 protein contains Pfam profile: PF02364 1,3-beta-glucan synthase [At3g59100.1]
A_84_P21910	TREATMENT	90 min col-0 treatment	45 min col-0 control	0.6989	0.1404	15	-4.98	0.000166	0.00965528		At1g12710.1	At1g12710.1	F-box family protein / SKP1 interacting partner 3-related contains Pfam profile PF00646: F-box domain [At1g12710.1]
A_84_P14214	TREATMENT	90 min col-0 treatment	45 min col-0 control	0.7101	0.1427	15	-4.98	0.000166	0.00965528		At1g70100.1	At1g70100.1	expressed protein [At1g70100.1]
A_84_P155805	TREATMENT	90 min col-0 treatment	45 min col-0 control	-0.3709	0.07469	15	4.97	0.000169	0.00977393		At5g15350.1	At5g15350.1	plastocyanin-like domain-containing protein contains plastocyanin-like domain Pfam:PF02298 [At5g15350.1]
A_84_P23737	TREATMENT	90 min col-0 treatment	45 min col-0 control	0.31	0.06242	15	-4.97	0.000169	0.00977393		At1g16030.1	At1g16030.1	heat shock protein 70, putative / HSP70, putative similar to heat shock protein hsp70 GI:1771478 from [Pisum sativum] [At1g16030.1]
A_84_P18718	TREATMENT	90 min col-0 treatment	45 min col-0 control	0.424	0.08536	15	-4.97	0.000169	0.00977393		At5g25830.1	At5g25830.1	zinc finger (GATA type) family protein GATA transcription factor, Arabidopsis thaliana, PIR:T05288 [At5g25830.1]
A_84_P17281	TREATMENT	90 min col-0 treatment	45 min col-0 control	-0.3478	0.07015	15	4.96	0.000172	0.00987263		At2g29550.1	At2g29550.1	tubulin beta-7 chain (TUB7) identical to GB:M84704 SP|P29515 Tubulin beta-7 chain {Arabidopsis thaliana} [At2g29550.1]
A_84_P126431	TREATMENT	90 min col-0 treatment	45 min col-0 control	-0.3144	0.06344	15	4.96	0.000172	0.00987263		At1g04820.1	At1g04820.1	tubulin alpha-2/alpha-4 chain (TUA4) nearly identical to SP:P29510 Tubulin alpha-2/alpha-4 chain from [Arabidopsis thaliana] [At1g04820.1]
A_84_P83889	TREATMENT	90 min col-0 treatment	45 min col-0 control	0.3021	0.06093	15	-4.96	0.000172	0.00987263		At1g65220.1	At1g65220.1	eIF4-gamma/eIF5/eIF2-epsilon domain-containing protein low similarity to SP|P47823 Translation initiation factor eIF-2B epsilon subunit (eIF-2B GDP-GTP exchange factor) {Oryctolagus cuniculus}; contains Pfam profile PF02020:...
A_84_P10125	TREATMENT	90 min col-0 treatment	45 min col-0 control	0.5782	0.1166	15	-4.96	0.000172	0.00987263		At4g14890.1	At4g14890.1	ferredoxin family protein similar to SP|P00252 Ferredoxin I from Nostoc muscorum, SP|P00248 Ferredoxin from Mastigocladus laminosus, SP|P00244 Ferredoxin I from Aphanizomenon flos-aquae; contains Pfam profile PF00111 2Fe-2S iron-sulfur cluster binding...
A_84_P18273	TREATMENT	90 min col-0 treatment	45 min col-0 control	0.4796	0.09677	15	-4.96	0.000173	0.0099114		At2g42290.1	At2g42290.1	leucine-rich repeat family protein contains protein kinase domain, Pfam:PF00069; contains leucine-rich repeats, Pfam:PF00560 [At2g42290.1]
A_84_P559200	TREATMENT	90 min col-0 treatment	45 min col-0 control	-0.9875	0.1996	15	4.95	0.000175	0.0100072		At5g02000.1	At5g02000.1	hypothetical protein [At5g02000.1]
A_84_P19458	TREATMENT	90 min col-0 treatment	45 min col-0 control	-0.2621	0.05305	15	4.94	0.000177	0.0100838		At4g04940.1	At4g04940.1	transducin family protein / WD-40 repeat family protein contains seven G-protein beta WD-40 repeats [At4g04940.1]
A_84_P74074	TREATMENT	90 min col-0 treatment	45 min col-0 control	0.237	0.04795	15	-4.94	0.000177	0.0100838		At5g07020.1	At5g07020.1	proline-rich family protein [At5g07020.1]
A_84_P13100	TREATMENT	90 min col-0 treatment	45 min col-0 control	-0.7571	0.1535	15	4.93	0.000181	0.0102164		At5g48410.1	At5g48410.1	glutamate receptor family protein (GLR1.3) plant glutamate receptor family, PMID:11379626 [At5g48410.1]
A_84_P19632	TREATMENT	90 min col-0 treatment	45 min col-0 control	-0.587	0.119	15	4.93	0.00018	0.0102164		At5g11740.1	At5g11740.1	arabinogalactan-protein (AGP15) identical to gi|10880507|gb|AAG24283 [At5g11740.1]
A_84_P11118	TREATMENT	90 min col-0 treatment	45 min col-0 control	-0.4994	0.1013	15	4.93	0.000181	0.0102164		At5g10390.1	At5g10390.1	histone H3 identical to histone H3 from Zea mays SP|P05203, Medicago sativa GI:166384, Encephalartos altensteinii SP|P08903, Pisum sativum SP|P02300; contains Pfam profile PF00125 Core histone H2A/H2B/H3/H4 [At5g10390.1]
A_84_P183544	TREATMENT	90 min col-0 treatment	45 min col-0 control	0.3215	0.06516	15	-4.93	0.00018	0.0102164		At1g26180.1	At1g26180.1	expressed protein [At1g26180.1]
A_84_P274610	TREATMENT	90 min col-0 treatment	45 min col-0 control	0.3864	0.07838	15	-4.93	0.000181	0.0102164		At2g39000.1	At2g39000.1	GCN5-related N-acetyltransferase (GNAT) family protein contains Pfam profile PF00583: acetyltransferase, GNAT family [At2g39000.1]
A_84_P22590	TREATMENT	90 min col-0 treatment	45 min col-0 control	0.3438	0.06974	15	-4.93	0.000182	0.010235		At5g57960.1	At5g57960.1	GTP-binding family protein similar to SP|P25519 GTP-binding protein hflX {Escherichia coli} [At5g57960.1]
A_84_P11943	TREATMENT	90 min col-0 treatment	45 min col-0 control	1.0407	0.2111	15	-4.93	0.000182	0.010235		At4g23590.1	At4g23590.1	aminotransferase class I and II family protein similar to nicotianamine aminotransferase from Hordeum vulgare [GI:6498122, GI:6469087]; contains Pfam profile PF00155 aminotransferase, classes I and II [At4g23590.1]
A_84_P16848	TREATMENT	90 min col-0 treatment	45 min col-0 control	1.0153	0.2061	15	-4.93	0.000183	0.0102723		At5g39580.1	At5g39580.1	peroxidase, putative identical to peroxidase ATP24a [Arabidopsis thaliana] gi|1890313|emb|CAA72484 [At5g39580.1]
A_84_P181994	TREATMENT	90 min col-0 treatment	45 min col-0 control	0.3336	0.06779	15	-4.92	0.000185	0.0103655		At3g02040.1	At3g02040.1	glycerophosphoryl diester phosphodiesterase family protein contains Pfam profile PF03009: Glycerophosphoryl diester phosphodiesterase family [At3g02040.1]
A_84_P12076	TREATMENT	90 min col-0 treatment	45 min col-0 control	0.3656	0.07434	15	-4.92	0.000186	0.0104025		At5g14620.1	At5g14620.1	cytosine methyltransferase (DRM2) identical to cytosine methyltransferase GI:7658293 from [Arabidopsis thaliana] [At5g14620.1]
A_84_P524749	TREATMENT	90 min col-0 treatment	45 min col-0 control	0.3913	0.07967	15	-4.91	0.000188	0.0104759		At5g41270.1	At5g41270.1	expressed protein [At5g41270.1]
A_84_P12071	TREATMENT	90 min col-0 treatment	45 min col-0 control	0.3928	0.07999	15	-4.91	0.000188	0.0104759		At5g13290.1	At5g13290.1	protein kinase family protein contains protein kinase domain, Pfam:PF00069 [At5g13290.1]
A_84_P95179	TREATMENT	90 min col-0 treatment	45 min col-0 control	-0.4504	0.09179	15	4.91	0.00019	0.0105681		At1g44050.1	At1g44050.1	DC1 domain-containing protein contains Pfam profile PF03107: DC1 domain [At1g44050.1]
A_84_P15324	TREATMENT	90 min col-0 treatment	45 min col-0 control	-0.5884	0.12	15	4.9	0.000191	0.0105852		At1g33560.1	At1g33560.1	disease resistance protein (CC-NBS-LRR class), putative domain signature CC-NBS-LRR exists, suggestive of a disease resistance protein. [At1g33560.1]
A_84_P312503	TREATMENT	90 min col-0 treatment	45 min col-0 control	0.2978	0.06074	15	-4.9	0.000191	0.0105852		At5g58220.1	At5g58220.1	expressed protein [At5g58220.1]
A_84_P10481	TREATMENT	90 min col-0 treatment	45 min col-0 control	-0.2626	0.05362	15	4.9	0.000193	0.0106766		At1g14040.1	At1g14040.1	EXS family protein / ERD1/XPR1/SYG1 family protein similar to PHO1 protein [Arabidopsis thaliana] GI:20069032; contains Pfam profiles PF03105: SPX domain, PF03124: EXS family [At1g14040.1]
A_84_P76794	TREATMENT	90 min col-0 treatment	45 min col-0 control	-0.2351	0.04809	15	4.89	0.000196	0.010823		At3g26680.1	At3g26680.1	DNA cross-link repair protein-related contains weak similarity to Swiss-Prot:P30620 DNA cross-LINK repair protein PSO2/SNM1 [Saccharomyces cerevisiae] [At3g26680.1]
A_84_P184234	TREATMENT	90 min col-0 treatment	45 min col-0 control	-0.4704	0.0964	15	4.88	0.0002	0.0110239		At3g23090.1	At3g23090.1	expressed protein [At3g23090.1]
A_84_P712808	TREATMENT	90 min col-0 treatment	45 min col-0 control	-0.4734	0.09705	15	4.88	0.000201	0.0110392		CHR2:012652854-012652913	CHR2:012652854-012652913	Unknown
A_84_P19196	TREATMENT	90 min col-0 treatment	45 min col-0 control	1.0223	0.2096	15	-4.88	0.000201	0.0110392		At1g75490.1	At1g75490.1	DRE-binding transcription factor, putative similar to DREB2A GB:BAA33794 GI:3738230 from [Arabidopsis thaliana] (Plant Cell 10 (8), 1391-1406 (1998)) [At1g75490.1]
A_84_P293504	TREATMENT	90 min col-0 treatment	45 min col-0 control	-1.3378	0.2751	15	4.86	0.000207	0.011328		At2g17600.1	At2g17600.1	DC1 domain-containing protein contains Pfam profile PF03107: DC1 domain [At2g17600.1]
A_84_P702942	TREATMENT	90 min col-0 treatment	45 min col-0 control	-0.4503	0.09262	15	4.86	0.000207	0.011328		CHR1:002693301-002693360	CHR1:002693301-002693360	Unknown
A_84_P21101	TREATMENT	90 min col-0 treatment	45 min col-0 control	-1.5447	0.3178	15	4.86	0.000208	0.011342		At2g38100.1	At2g38100.1	proton-dependent oligopeptide transport (POT) family protein low similarity to SP|P46032 Peptide transporter PTR2-B (Histidine transporting protein) {Arabidopsis thaliana}; contains Pfam profile PF00854: POT family [At2g38100.1]
A_84_P575680	TREATMENT	90 min col-0 treatment	45 min col-0 control	1.2464	0.2565	15	-4.86	0.000208	0.011342		At2g17680.1	At2g17680.1	expressed protein contains Pfam profile PF03087: Arabidopsis protein of unknown function; expression supported by MPSS [At2g17680.1]
A_84_P15129	TREATMENT	90 min col-0 treatment	45 min col-0 control	-0.4732	0.09748	15	4.85	0.00021	0.0113699		At1g50290.1	At1g50290.1	expressed protein [At1g50290.1]
A_84_P282310	TREATMENT	90 min col-0 treatment	45 min col-0 control	-0.405	0.08341	15	4.86	0.00021	0.0113699		At5g03040.1	At5g03040.1	calmodulin-binding family protein similar to SF16 protein [Helianthus annuus] GI:560150; contains Pfam profile PF00612: IQ calmodulin-binding motif [At5g03040.1]
A_84_P17826	TREATMENT	90 min col-0 treatment	45 min col-0 control	0.3052	0.06287	15	-4.86	0.00021	0.0113699		At1g29530.1	At1g29530.1	expressed protein [At1g29530.1]
A_84_P15709	TREATMENT	90 min col-0 treatment	45 min col-0 control	0.3806	0.07836	15	-4.86	0.000209	0.0113699		At4g19840.1	At4g19840.1	lectin-related similar to PP2 lectin polypeptide [Cucurbita maxima] GI:410437 [At4g19840.1]
A_84_P11921	TREATMENT	90 min col-0 treatment	45 min col-0 control	-0.7352	0.1516	15	4.85	0.000213	0.0115119		At4g18010.1	At4g18010.1	inositol polyphosphate 5-phosphatase II (IP5PII) nearly identical to inositol polyphosphate 5-phosphatase II [Arabidopsis thaliana] GI:10444263 isoform contains an AT-acceptor splice site at intron 6 [At4g18010.1]
A_84_P19642	TREATMENT	90 min col-0 treatment	45 min col-0 control	0.3431	0.07079	15	-4.85	0.000214	0.0115252		At5g15390.1	At5g15390.1	tRNA/rRNA methyltransferase (SpoU) family protein similar to SP|P19396 tRNA (Guanosine-2'-O-)-methyltransferase (EC 2.1.1.34) {Escherichia coli O157:H7}; contains Pfam profile PF00588: SpoU rRNA Methylase (RNA methyltransferase, TrmH) family...
A_84_P544120	TREATMENT	90 min col-0 treatment	45 min col-0 control	0.4266	0.08803	15	-4.85	0.000214	0.0115252		At4g32860.1	At4g32860.1	expressed protein [At4g32860.1]
A_84_P23502	TREATMENT	90 min col-0 treatment	45 min col-0 control	-0.5102	0.1053	15	4.84	0.000215	0.0115586		At5g48070.1	At5g48070.1	xyloglucan:xyloglucosyl transferase, putative / xyloglucan endotransglycosylase, putative / endo-xyloglucan transferase, putative similar to xyloglucan endotransglycosylase TCH4 GI:886116 from [Arabidopsis thaliana] [At5g48070.1]
A_84_P555320	TREATMENT	90 min col-0 treatment	45 min col-0 control	-1.1836	0.2447	15	4.84	0.000217	0.0116457		At2g38830.1	At2g38830.1	tumor susceptibility protein-related contains weak similarity to Swiss-Prot:Q99816 tumor susceptibility gene 101 protein [Homo sapiens] [At2g38830.1]
A_84_P551820	TREATMENT	90 min col-0 treatment	45 min col-0 control	-0.3266	0.06758	15	4.83	0.000219	0.0116913		At3g04770.1	At3g04770.1	40S ribosomal protein SA (RPSaB) identical to p40 protein homolog GB:AAB67866 [Arabidopsis thaliana]; similar to 40S ribosomal protein SA (P40) GB:O65751 [Cicer arietinum] [At3g04770.1]
A_84_P19401	TREATMENT	90 min col-0 treatment	45 min col-0 control	0.2978	0.06162	15	-4.83	0.000219	0.0116913		At3g54880.1	At3g54880.1	expressed protein [At3g54880.1]
A_84_P53570	TREATMENT	90 min col-0 treatment	45 min col-0 control	3.0881	0.6389	15	-4.83	0.000219	0.0116913		At2g41810.1	At2g41810.1	expressed protein contains Pfam profile PF04862: Protein of unknown function, DUF642 [At2g41810.1]
A_84_P282590	TREATMENT	90 min col-0 treatment	45 min col-0 control	0.2007	0.0416	15	-4.83	0.000223	0.0118841		At2g44760.1	At2g44760.1	expressed protein [At2g44760.1]
A_84_P21995	TREATMENT	90 min col-0 treatment	45 min col-0 control	-0.3596	0.07455	15	4.82	0.000224	0.0119166		At2g22100.1	At2g22100.1	RNA recognition motif (RRM)-containing protein similar to UBP1 interacting protein 1a [Arabidopsis thaliana] GI:19574236; contains Pfam profile: PF00076 RNA recognition motif (aka RRM, RBD, or RNP domain) [At2g22100.1]
A_84_P718663	TREATMENT	90 min col-0 treatment	45 min col-0 control	-0.167	0.03466	15	4.82	0.000225	0.011949		CHR2:001704334-001704275	CHR2:001704334-001704275	Unknown
A_84_P18114	TREATMENT	90 min col-0 treatment	45 min col-0 control	0.3595	0.07465	15	-4.82	0.000227	0.0120343		At1g76710.1	At1g76710.1	SET domain-containing protein (ASHH1) low similarity to huntingtin interacting protein 1 [Homo sapiens] GI:12697196; contains Pfam profile PF00856: SET domain; identical to cDNA ASH1-like protein 1 (ASHH1) partial cds GI:15488417 [At1g76710.1]
A_84_P10432	TREATMENT	90 min col-0 treatment	45 min col-0 control	-0.7166	0.1489	15	4.81	0.000228	0.0120663		At1g62180.1	At1g62180.1	5'-adenylylsulfate reductase 2, chloroplast (APR2) (APSR) / adenosine 5'-phosphosulfate 5'-adenylylsulfate (APS) sulfotransferase 2 / 3'-phosphoadenosine-5'-phosphosulfate (PAPS) reductase homolog 43 (PRH-43) identical to SP|P92981 5'-adenylylsulfate...
A_84_P718099	TREATMENT	90 min col-0 treatment	45 min col-0 control	-0.4157	0.0864	15	4.81	0.000229	0.0120983		CHR4:008550292-008550351	CHR4:008550292-008550351	Unknown
A_84_P10653	TREATMENT	90 min col-0 treatment	45 min col-0 control	0.4683	0.09741	15	-4.81	0.00023	0.0121301		At2g26740.1	At2g26740.1	epoxide hydrolase, soluble (sEH) identical to ATsEH [Arabidopsis thaliana] GI:1109600 [At2g26740.1]
A_84_P11730	TREATMENT	90 min col-0 treatment	45 min col-0 control	-1.0658	0.2218	15	4.8	0.000232	0.0121517		At3g21560.1	At3g21560.1	UDP-glucosyltransferase, putative similar to UDP-glucose:sinapate glucosyltransferase GI:9794913 from [Brassica napus] [At3g21560.1]
A_84_P12422	TREATMENT	90 min col-0 treatment	45 min col-0 control	-0.7828	0.1629	15	4.8	0.000232	0.0121517		At1g48670.1	At1g48670.1	auxin-responsive GH3 family protein similar to auxin-responsive GH3 product [Glycine max] GI:18591; contains Pfam profile PF03321: GH3 auxin-responsive promoter [At1g48670.1]
A_84_P64884	TREATMENT	90 min col-0 treatment	45 min col-0 control	0.1887	0.03927	15	-4.8	0.000232	0.0121517		At5g51150.1	At5g51150.1	expressed protein similar to unknown protein (gb|AAD46013.1) [At5g51150.1]
A_84_P20828	TREATMENT	90 min col-0 treatment	45 min col-0 control	0.2568	0.05344	15	-4.81	0.000232	0.0121517		At1g03420.1	At1g03420.1	expressed protein similar to gb|T45484, emb|Z30724, and emb|Z30531 [At1g03420.1]
A_84_P24013	TREATMENT	90 min col-0 treatment	45 min col-0 control	-0.8206	0.171	15	4.8	0.000234	0.0122145		At1g53610.1	At1g53610.1	hypothetical protein [At1g53610.1]
A_84_P284070	TREATMENT	90 min col-0 treatment	45 min col-0 control	0.306	0.06375	15	-4.8	0.000234	0.0122145		At3g15530.1	At3g15530.1	expressed protein [At3g15530.1]
A_84_P12920	TREATMENT	90 min col-0 treatment	45 min col-0 control	-0.4305	0.08974	15	4.8	0.000235	0.0122458		At4g30470.1	At4g30470.1	cinnamoyl-CoA reductase-related similar to cinnamoyl-CoA reductase from Pinus taeda [GI:17978649], Saccharum officinarum [GI:3341511] [At4g30470.1]
A_84_P10767	TREATMENT	90 min col-0 treatment	45 min col-0 control	0.4055	0.0846	15	-4.79	0.000237	0.012329		At3g02990.1	At3g02990.1	heat shock factor protein 2 (HSF2) / heat shock transcription factor 2 (HSTF2) identical to heat shock transcription factor 2 (HSF2) SP:Q96320 from [Arabidopsis thaliana]; contains Pfam profile: PF00447 HSF-type DNA-binding domain [At3g02990.1]
A_84_P737318	TREATMENT	90 min col-0 treatment	45 min col-0 control	-1.9951	0.4164	15	4.79	0.000238	0.0123599		AV802416	AV802416	AV802416 RAFL9 Arabidopsis thaliana cDNA clone RAFL09-31-N12 3', mRNA sequence [AV802416]
A_84_P13040	TREATMENT	90 min col-0 treatment	45 min col-0 control	0.3894	0.08132	15	-4.79	0.000239	0.0123908		At5g24800.1	At5g24800.1	bZIP transcription factor family protein contains Pfam profile: PF00170 bZIP transcription factor; identical to cDNA bZIP protein BZO2H2 GI:10954096 [At5g24800.1]
A_84_P20918	TREATMENT	90 min col-0 treatment	45 min col-0 control	-0.8359	0.1748	15	4.78	0.000242	0.0124502		At1g73780.1	At1g73780.1	protease inhibitor/seed storage/lipid transfer protein (LTP) family protein contains Pfam profile: PF00234 protease inhibitor/seed storage/LTP family [At1g73780.1]
A_84_P21719	TREATMENT	90 min col-0 treatment	45 min col-0 control	-0.4226	0.08841	15	4.78	0.000243	0.0124502		At5g38350.1	At5g38350.1	disease resistance protein (NBS-LRR class), putative domain signature NBS-LRR exists, suggestive of a disease resistance protein. [At5g38350.1]
A_84_P11353	TREATMENT	90 min col-0 treatment	45 min col-0 control	-0.4214	0.08806	15	4.79	0.000241	0.0124502		At1g23750.1	At1g23750.1	DNA-binding protein-related contains weak similarity to G-quartet DNA binding protein 3 [Tetrahymena thermophila] gi|4583503|gb|AAD25098 [At1g23750.1]
A_84_P11231	TREATMENT	90 min col-0 treatment	45 min col-0 control	0.3167	0.06624	15	-4.78	0.000243	0.0124502		At5g54520.1	At5g54520.1	WD-40 repeat family protein contains 5 WD-40 repeats (PF00400); similar to pre-mRNA splicing factor PRP17 (SP:O60508) [Homo sapiens] [At5g54520.1]
A_84_P17985	TREATMENT	90 min col-0 treatment	45 min col-0 control	0.3438	0.07192	15	-4.78	0.000243	0.0124502		At1g61170.1	At1g61170.1	expressed protein [At1g61170.1]
A_84_P137499	TREATMENT	90 min col-0 treatment	45 min col-0 control	0.4419	0.09239	15	-4.78	0.000242	0.0124502		At2g20180.1	At2g20180.1	basic helix-loop-helix (bHLH) family protein contains Pfam domain, PF00010: Helix-loop-helix DNA-binding domain [At2g20180.1]
A_84_P23535	TREATMENT	90 min col-0 treatment	45 min col-0 control	0.5901	0.1234	15	-4.78	0.000242	0.0124502		At5g57630.1	At5g57630.1	CBL-interacting protein kinase 21, putative (CIPK21) identical to CBL-interacting protein kinase 21 [Arabidopsis thaliana] gi|14334390|gb|AAK59696 [At5g57630.1]
A_84_P17448	TREATMENT	90 min col-0 treatment	45 min col-0 control	-0.3278	0.06864	15	4.78	0.000245	0.0124898		At3g29360.1	At3g29360.1	UDP-glucose 6-dehydrogenase, putative very strong similarity to SP|Q96558 UDP-glucose 6-dehydrogenase (EC 1.1.1.22) (UDP-Glc dehydrogenase) (UDP-GlcDH) (UDPGDH) {Glycine max}; contains Pfam profiles PF03721: UDP-glucose/GDP-mannose dehydrogenase...
A_84_P159405	TREATMENT	90 min col-0 treatment	45 min col-0 control	0.3487	0.07301	15	-4.78	0.000245	0.0124898		At2g29660.1	At2g29660.1	zinc finger (C2H2 type) family protein contains zinc finger, C2H2 type, domain, PROSITE:PS00028 [At2g29660.1]
A_84_P10263	TREATMENT	90 min col-0 treatment	45 min col-0 control	0.7341	0.1537	15	-4.78	0.000245	0.0124898		At5g48100.1	At5g48100.1	laccase family protein / diphenol oxidase family protein similar to laccase [Pinus taeda][GI:13661197] [At5g48100.1]
A_84_P99486	TREATMENT	90 min col-0 treatment	45 min col-0 control	-0.5313	0.1113	15	4.77	0.000246	0.0125082		At1g22330.1	At1g22330.1	RNA recognition motif (RRM)-containing protein similar to UBP1 interacting protein 1a [Arabidopsis thaliana] GI:19574236; contains InterPro entry IPR000504: RNA-binding region RNP-1 (RNA recognition motif) (RRM) [At1g22330.1]
A_84_P16022	TREATMENT	90 min col-0 treatment	45 min col-0 control	-0.3378	0.07078	15	4.77	0.000247	0.0125082		At5g20280.1	At5g20280.1	sucrose-phosphate synthase, putative similar to sucrose-phosphate synthase (EC 2.4.1.14) isoform 1 - Citrus unshiu, EMBL:AB005023 [At5g20280.1]
A_84_P165273	TREATMENT	90 min col-0 treatment	45 min col-0 control	0.1641	0.03438	15	-4.77	0.000247	0.0125082		At5g65440.1	At5g65440.1	expressed protein [At5g65440.1]
A_84_P16528	TREATMENT	90 min col-0 treatment	45 min col-0 control	0.3548	0.07434	15	-4.77	0.000247	0.0125082		At1g48440.1	At1g48440.1	expressed protein [At1g48440.1]
A_84_P576622	TREATMENT	90 min col-0 treatment	45 min col-0 control	1.6967	0.3561	15	-4.76	0.000251	0.0126897		At2g32200.1	At2g32200.1	hypothetical protein [At2g32200.1]
A_84_P21930	TREATMENT	90 min col-0 treatment	45 min col-0 control	-0.241	0.05061	15	4.76	0.000252	0.0127192		At1g02970.1	At1g02970.1	protein kinase, putative similar to Wee1-like protein GI:5821717 from [Zea mays] [At1g02970.1]
A_84_P18423	TREATMENT	90 min col-0 treatment	45 min col-0 control	-1.5354	0.3227	15	4.76	0.000254	0.012799		At3g47480.1	At3g47480.1	calcium-binding EF hand family protein contains INTERPRO:IPR002048 calcium-binding EF-hand domain [At3g47480.1]
A_84_P20506	TREATMENT	90 min col-0 treatment	45 min col-0 control	0.442	0.09297	15	-4.75	0.000256	0.0128786		At4g35290.1	At4g35290.1	glutamate receptor family protein (GLR3.2) (GLUR2) identical to putative glutamate receptor like-protein GLUR2 [Arabidopsis thaliana] gi|13160471|gb|AAK13248; plant glutamate receptor family, PMID:11379626 [At4g35290.1]
A_84_P13712	TREATMENT	90 min col-0 treatment	45 min col-0 control	-0.351	0.0739	15	4.75	0.000258	0.0129366		At3g51460.1	At3g51460.1	phosphoinositide phosphatase family protein contains similarity to phosphoinositide phosphatase SAC1 [Rattus norvegicus] gi|11095248|gb|AAG29810; contains Pfam domain, PF02383: SacI homology domain; contains non-consensus AT-AC splice sites at intron...
A_84_P599601	TREATMENT	90 min col-0 treatment	45 min col-0 control	-0.2179	0.04588	15	4.75	0.000258	0.0129366		At1g29965.1	At1g29965.1	60S ribosomal protein L18A (RPL18aA) JRW [At1g29965.1]
A_84_P267160	TREATMENT	90 min col-0 treatment	45 min col-0 control	-1.5425	0.3249	15	4.75	0.00026	0.0129942		At5g46890.1	At5g46890.1	protease inhibitor/seed storage/lipid transfer protein (LTP) family protein similar to proline-rich 14 kDa protein {Phaseolus vulgaris} GP|1420885; contains Pfam protease inhibitor/seed storage/LTP family domain PF00234 [At5g46890.1]
A_84_P10897	TREATMENT	90 min col-0 treatment	45 min col-0 control	-0.608	0.1281	15	4.75	0.00026	0.0129942		At3g55950.1	At3g55950.1	protein kinase family protein contains protein kinase domain, Pfam:PF00069; similar to cytokinin-regulated kinase 1 [Nicotiana tabacum] gi|10998537|gb|AAG25966 [At3g55950.1]
A_84_P297924	TREATMENT	90 min col-0 treatment	45 min col-0 control	0.4368	0.09209	15	-4.74	0.000261	0.0130016		At3g06210.1	At3g06210.1	expressed protein contains Prosite PS00616: Histidine acid phosphatases phosphohistidine signature; [At3g06210.1]
A_84_P525896	TREATMENT	90 min col-0 treatment	45 min col-0 control	0.5253	0.1107	15	-4.74	0.000261	0.0130016		At1g58235.1	At1g58235.1	expressed protein [At1g58235.1]
A_84_P603395	TREATMENT	90 min col-0 treatment	45 min col-0 control	-0.4008	0.08454	15	4.74	0.000263	0.0130586		At2g41330.1	At2g41330.1	glutaredoxin family protein contains Pfam profile PF00462: Glutaredoxin [At2g41330.1]
A_84_P12869	TREATMENT	90 min col-0 treatment	45 min col-0 control	-0.1994	0.04205	15	4.74	0.000263	0.0130586		At4g18800.1	At4g18800.1	Ras-related GTP-binding family protein similar to ras-related GTP binding protein RIC2 SP:P40393 from [Oryza sativa]; contains Pfam profile: PF00071 Ras family [At4g18800.1]
A_84_P17514	TREATMENT	90 min col-0 treatment	45 min col-0 control	-0.248	0.05232	15	4.74	0.000264	0.0130658		At3g55850.1	At3g55850.1	amidohydrolase family protein weak similarity to SP|Q06555 Exoenzymes regulatory protein aepA precursor {Erwinia carotovora}; contains Pfam profile PF01979: Amidohydrolase family [At3g55850.1]
A_84_P21915	TREATMENT	90 min col-0 treatment	45 min col-0 control	0.6236	0.1316	15	-4.74	0.000264	0.0130658		At1g20190.1	At1g20190.1	expansin, putative (EXP11) similar to GB:U30460 from [Cucumis sativus]; alpha-expansin gene family, PMID:11641069 [At1g20190.1]
A_84_P16925	TREATMENT	90 min col-0 treatment	45 min col-0 control	-0.2844	0.06005	15	4.74	0.000265	0.0130729		At5g60280.1	At5g60280.1	lectin protein kinase family protein contains Pfam domains, PF00138: Legume lectins alpha domain, PF00139: Legume lectins beta domain, and PF00069: Protein kinase domain [At5g60280.1]
A_84_P258360	TREATMENT	90 min col-0 treatment	45 min col-0 control	0.8282	0.1748	15	-4.74	0.000265	0.0130729		At5g26290.1	At5g26290.1	meprin and TRAF homology domain-containing protein / MATH domain-containing protein low similarity to ubiquitin-specific protease 12 [Arabidopsis thaliana] GI:11993471; contains Pfam profile PF00917: MATH domain [At5g26290.1]
A_84_P174511	TREATMENT	90 min col-0 treatment	45 min col-0 control	0.3901	0.08244	15	-4.73	0.000268	0.0131996		At5g16110.1	At5g16110.1	expressed protein hypothetical protein T26J14.6 - Arabidopsis thaliana, EMBL:AC011915 [At5g16110.1]
A_84_P21147	TREATMENT	90 min col-0 treatment	45 min col-0 control	-0.3232	0.06837	15	4.73	0.00027	0.0132553		At3g09300.1	At3g09300.1	oxysterol-binding family protein similar to SP|P22059 Oxysterol-binding protein 1 {Homo sapiens}; contains Pfam profile PF01237: Oxysterol-binding protein [At3g09300.1]
A_84_P725988	TREATMENT	90 min col-0 treatment	45 min col-0 control	1.7035	0.3603	15	-4.73	0.00027	0.0132553		AV440386	AV440386	AV440386 Arabidopsis thaliana above-ground organ two to six-week old Arabidopsis thaliana cDNA clone APD60g01_f 3', mRNA sequence [AV440386]
A_84_P142859	TREATMENT	90 min col-0 treatment	45 min col-0 control	0.6885	0.1457	15	-4.73	0.000271	0.013283		At2g41700.1	At2g41700.1	ABC transporter family protein similar to ATP-binding cassette transporter ABCA1 GI:18031705 from [Arabidopsis thaliana] [At2g41700.1]
A_84_P16917	TREATMENT	90 min col-0 treatment	45 min col-0 control	0.3144	0.06658	15	-4.72	0.000273	0.0133596		At5g58720.1	At5g58720.1	PRLI-interacting factor, putative similar to PRLI-interacting factor N [Arabidopsis thaliana] GI:11139276; contains Pfam profile PF01713: Smr domain [At5g58720.1]
A_84_P298814	TREATMENT	90 min col-0 treatment	45 min col-0 control	-0.5136	0.109	15	4.71	0.000279	0.0136314		At5g26660.1	At5g26660.1	myb family transcription factor (MYB4) (MYB86) contains Pfam profile: PF00249 myb-like DNA-binding domain; identical to cDNA putative transcription factor (MYB86) mRNA, partial cds GI:3941517 [At5g26660.1]
A_84_P604524	TREATMENT	90 min col-0 treatment	45 min col-0 control	0.4162	0.08841	15	-4.71	0.00028	0.0136584		At4g14620.1	At4g14620.1	expressed protein contains Pfam profile PF04720: Protein of unknown function (DUF506) [At4g14620.1]
A_84_P177594	TREATMENT	90 min col-0 treatment	45 min col-0 control	-0.7412	0.1575	15	4.7	0.000282	0.013734		At3g61390.2	At3g61390.2	U-box domain-containing protein several hypothetical proteins - Arabidopsis thaliana [At3g61390.2]
A_84_P17164	TREATMENT	90 min col-0 treatment	45 min col-0 control	-0.8042	0.1711	15	4.7	0.000285	0.013814		At1g68880.1	At1g68880.1	bZIP transcription factor family protein similar to common plant regulatory factor 6 GI:9650826 from [Petroselinum crispum]; contains Pfam profile: PF00170 bZIP transcription factor [At1g68880.1]
A_84_P15458	TREATMENT	90 min col-0 treatment	45 min col-0 control	-0.5041	0.1073	15	4.7	0.000285	0.013814		At1g41830.1	At1g41830.1	multi-copper oxidase type I family protein similar to pollen-specific BP10 protein [SP|Q00624][Brassica napus]; contains Pfam profile: PF00394 Multicopper oxidase [At1g41830.1]
A_84_P14933	TREATMENT	90 min col-0 treatment	45 min col-0 control	-0.4337	0.09229	15	4.7	0.000285	0.013814		At5g25460.1	At5g25460.1	expressed protein contains Pfam profile PF04862: Protein of unknown function, DUF642 [At5g25460.1]
A_84_P21600	TREATMENT	90 min col-0 treatment	45 min col-0 control	-1.1319	0.2412	15	4.69	0.000289	0.0138758		At5g45650.1	At5g45650.1	subtilase family protein contains Pfam domain, PF00082: Subtilase family; contains Pfam domain, PF02225: protease associated (PA) domain [At5g45650.1]
A_84_P11223	TREATMENT	90 min col-0 treatment	45 min col-0 control	-0.8533	0.1817	15	4.7	0.000287	0.0138758		At5g52020.1	At5g52020.1	AP2 domain-containing protein low similarity to DREB1B GI:3738226 from [Arabidopsis thaliana]; contains Pfam profile PF00847: AP2 domain [At5g52020.1]
A_84_P11078	TREATMENT	90 min col-0 treatment	45 min col-0 control	-0.6979	0.1487	15	4.69	0.000288	0.0138758		At4g16920.1	At4g16920.1	disease resistance protein (TIR-NBS-LRR class), putative domain signature TIR-NBS-LRR exists, suggestive of a disease resistance protein. [At4g16920.1]
A_84_P232239	TREATMENT	90 min col-0 treatment	45 min col-0 control	-0.5025	0.1071	15	4.69	0.000289	0.0138758		NP456336	NP456336	unknown protein [Arabidopsis thaliana] [NP456336]
A_84_P18497	TREATMENT	90 min col-0 treatment	45 min col-0 control	-0.3902	0.08316	15	4.69	0.000289	0.0138758		At4g00900.1	At4g00900.1	calcium-transporting ATPase 2, endoplasmic reticulum-type (ECA2) nearly identical to SP|O23087 Calcium-transporting ATPase 2, endoplasmic reticulum-type (EC 3.6.3.8) {Arabidopsis thaliana}; contains InterPro Accession IPR006069: Cation transporting...
A_84_P17871	TREATMENT	90 min col-0 treatment	45 min col-0 control	0.2879	0.06134	15	-4.69	0.000289	0.0138758		At1g56090.1	At1g56090.1	tetratricopeptide repeat (TPR)-containing protein contains Pfam profile PF00515 TPR Domain; similar to infertility-related sperm protein [Homo sapiens] GI:10863768, TPR-containing protein involved in spermatogenesis TPIS [Mus musculus] GI:6272680...
A_84_P11922	TREATMENT	90 min col-0 treatment	45 min col-0 control	1.7224	0.3672	15	-4.69	0.00029	0.0139019		At4g18280.1	At4g18280.1	glycine-rich cell wall protein-related glycine-rich protein 1.0 precursor, Phaseolus vulgaris, PIR1:S01821 [At4g18280.1]
A_84_P551319	TREATMENT	90 min col-0 treatment	45 min col-0 control	-0.9467	0.2019	15	4.69	0.000291	0.0139062		At5g38790.1	At5g38790.1	expressed protein predicted protein, Arabidopsis thaliana; expression supported by MPSS [At5g38790.1]
A_84_P218928	TREATMENT	90 min col-0 treatment	45 min col-0 control	0.7165	0.1528	15	-4.69	0.000291	0.0139062		At1g60010.1	At1g60010.1	expressed protein [At1g60010.1]
A_84_P23288	TREATMENT	90 min col-0 treatment	45 min col-0 control	0.2883	0.06157	15	-4.68	0.000295	0.0140753		At4g22810.1	At4g22810.1	DNA-binding protein-related contains Pfam domain PF03479: Domain of unknown function (DUF296), found in AT-hook motifs Pfam:PF02178 [At4g22810.1]
A_84_P306050	TREATMENT	90 min col-0 treatment	45 min col-0 control	-0.3711	0.07931	15	4.68	0.000297	0.0140827		At5g55960.1	At5g55960.1	expressed protein [At5g55960.1]
A_84_P14706	TREATMENT	90 min col-0 treatment	45 min col-0 control	0.4036	0.08626	15	-4.68	0.000297	0.0140827		At3g62980.1	At3g62980.1	transport inhibitor response 1 (TIR1) (FBL1) E3 ubiquitin ligase SCF complex F-box subunit; identical to transport inhibitor response 1 GI:2352492 from [Arabidopsis thaliana] [At3g62980.1]
A_84_P14201	TREATMENT	90 min col-0 treatment	45 min col-0 control	0.4149	0.08867	15	-4.68	0.000297	0.0140827		At1g60680.1	At1g60680.1	aldo/keto reductase family protein contains Pfam profile PF00248: oxidoreductase, aldo/keto reductase family [At1g60680.1]
A_84_P19147	TREATMENT	90 min col-0 treatment	45 min col-0 control	0.4265	0.09111	15	-4.68	0.000296	0.0140827		At2g40970.1	At2g40970.1	myb family transcription factor contains Pfam profile: PF00249 myb-like DNA-binding domain [At2g40970.1]
A_84_P583430	TREATMENT	90 min col-0 treatment	45 min col-0 control	0.3531	0.07551	15	-4.68	0.000299	0.0141556		At5g66310.1	At5g66310.1	kinesin motor family protein contains Pfam domain, PF00225: Kinesin motor domain [At5g66310.1]
A_84_P569671	TREATMENT	90 min col-0 treatment	45 min col-0 control	-1.4872	0.3184	15	4.67	0.000301	0.0142282		At3g48640.1	At3g48640.1	expressed protein [At3g48640.1]
A_84_P14832	TREATMENT	90 min col-0 treatment	45 min col-0 control	-0.9061	0.1942	15	4.67	0.000305	0.014395		At4g35640.1	At4g35640.1	serine O-acetyltransferase, putative similar to serine acetyltransferase, Arabidopsis thaliana, GI:905391; contains Pfam profile PF00132: Bacterial transferase hexapeptide (four repeats) [At4g35640.1]
A_84_P277000	TREATMENT	90 min col-0 treatment	45 min col-0 control	0.3728	0.07998	15	-4.66	0.000307	0.014467		At5g53450.1	At5g53450.1	protein kinase family protein contains protein kinase domain, Pfam:PF00069 [At5g53450.1]
A_84_P105816	TREATMENT	90 min col-0 treatment	45 min col-0 control	-0.9496	0.2038	15	4.66	0.000308	0.0144695		At5g25260.1	At5g25260.1	expressed protein [At5g25260.1]
A_84_P102376	TREATMENT	90 min col-0 treatment	45 min col-0 control	1.8371	0.3942	15	-4.66	0.000308	0.0144695		At5g08000.1	At5g08000.1	glycosyl hydrolase family protein 17 similar to beta-1,3-glucanase GI:15150341 from [Camellia sinensis]; C-terminal homology only [At5g08000.1]
A_84_P536721	TREATMENT	90 min col-0 treatment	45 min col-0 control	1.7682	0.3796	15	-4.66	0.000309	0.0144942		At2g35990.1	At2g35990.1	hypothetical protein contains Pfam profile PF03641: decarboxylase family protein [At2g35990.1]
A_84_P212378	TREATMENT	90 min col-0 treatment	45 min col-0 control	0.4465	0.09588	15	-4.66	0.00031	0.0144966		At1g80060.1	At1g80060.1	expressed protein [At1g80060.1]
A_84_P216158	TREATMENT	90 min col-0 treatment	45 min col-0 control	1.7913	0.3847	15	-4.66	0.00031	0.0144966		At5g43175.1	At5g43175.1	basic helix-loop-helix (bHLH) family protein contains Pfam profile: PF00010 helix-loop-helix DNA-binding domain [At5g43175.1]
A_84_P23418	TREATMENT	90 min col-0 treatment	45 min col-0 control	-0.2803	0.06024	15	4.65	0.000312	0.0145678		At5g12860.1	At5g12860.1	oxoglutarate/malate translocator, putative similar to 2-oxoglutarate/malate translocator precursor, spinach, SWISSPROT:Q41364 [At5g12860.1]
A_84_P174431	TREATMENT	90 min col-0 treatment	45 min col-0 control	0.3958	0.08509	15	-4.65	0.000313	0.0145921		At5g03180.1	At5g03180.1	zinc finger (C3HC4-type RING finger) family protein various predicted proteins, Arabidopsis thaliana ; contains Pfam profile PF00097: Zinc finger, C3HC4 type (RING finger) [At5g03180.1]
A_84_P574977	TREATMENT	90 min col-0 treatment	45 min col-0 control	-0.4087	0.08788	15	4.65	0.000314	0.0146165		At3g24840.1	At3g24840.1	SEC14 cytosolic factor, putative / phosphoglyceride transfer protein, putative similar to phosphatidylinositol transfer-like protein IV (GI:14486707) [Lotus japonicus]; similar to SEC14 CYTOSOLIC FACTOR (PHOSPHATIDYLINOSITOL/ PHOSPHATIDYLCHOLINE...
A_84_P22512	TREATMENT	90 min col-0 treatment	45 min col-0 control	-0.3317	0.0714	15	4.65	0.000317	0.0146667		At5g35580.1	At5g35580.1	protein kinase, putative similar to auxin-regulated dual specificity cytosolic kinase [Lycopersicon esculentum] gi|14484938|gb|AAK62821 [At5g35580.1]
A_84_P23139	TREATMENT	90 min col-0 treatment	45 min col-0 control	0.243	0.0523	15	-4.65	0.000316	0.0146667		At3g44330.1	At3g44330.1	expressed protein [At3g44330.1]
A_84_P168193	TREATMENT	90 min col-0 treatment	45 min col-0 control	0.2519	0.05422	15	-4.65	0.000317	0.0146667		At2g01100.1	At2g01100.1	expressed protein [At2g01100.1]
A_84_P59630	TREATMENT	90 min col-0 treatment	45 min col-0 control	0.3449	0.07424	15	-4.65	0.000317	0.0146667		At1g30200.1	At1g30200.1	F-box family protein contains Pfam PF00646: F-box domain; similar to hypothetical protein GI:2832643 from [Arabidopsis thaliana] [At1g30200.1]
A_84_P21617	TREATMENT	90 min col-0 treatment	45 min col-0 control	-0.3616	0.07786	15	4.64	0.000318	0.0146907		At5g49910.1	At5g49910.1	heat shock protein 70 / HSP70 (HSC70-7) identical to heat shock protein 70 [Arabidopsis thaliana] GI:6746592 [At5g49910.1]
A_84_P196244	TREATMENT	90 min col-0 treatment	45 min col-0 control	0.1922	0.0414	15	-4.64	0.000319	0.0147146		At5g57930.1	At5g57930.1	expressed protein [At5g57930.1]
A_84_P731601	TREATMENT	90 min col-0 treatment	45 min col-0 control	-0.4701	0.1013	15	4.64	0.00032	0.0147385		CHR5:012607363-012607304	CHR5:012607363-012607304	Unknown
A_84_P540888	TREATMENT	90 min col-0 treatment	45 min col-0 control	0.4133	0.08911	15	-4.64	0.000322	0.0148083		At1g17940.1	At1g17940.1	expressed protein [At1g17940.1]
A_84_P13147	TREATMENT	90 min col-0 treatment	45 min col-0 control	-0.4397	0.09501	15	4.63	0.000328	0.0150615		At5g61030.1	At5g61030.1	RNA-binding protein, putative similar to RNA-binding protein from [Solanum tuberosum] GI:15822705, [Nicotiana tabacum] GI:15822703, [Nicotiana sylvestris] GI:624925; contains InterPro entry IPR000504: RNA-binding region RNP-1 (RNA recognition motif)...
A_84_P18944	TREATMENT	90 min col-0 treatment	45 min col-0 control	0.3265	0.07057	15	-4.63	0.000329	0.0150847		At1g09710.1	At1g09710.1	myb family transcription factor contains Pfam profile: PF00249 myb-like DNA-binding domain [At1g09710.1]
A_84_P588433	TREATMENT	90 min col-0 treatment	45 min col-0 control	-0.6879	0.1487	15	4.63	0.00033	0.0150853		At3g61750.1	At3g61750.1	auxin-responsive protein -related similar to auxin-induced protein AIR12 GI:11357190 [Arabidopsis thaliana]; [At3g61750.1]
A_84_P276200	TREATMENT	90 min col-0 treatment	45 min col-0 control	0.2689	0.05813	15	-4.63	0.00033	0.0150853		At1g49890.1	At1g49890.1	expressed protein contains Pfam domain, PF04484: Family of unknown function (DUF566) [At1g49890.1]
A_84_P13756	TREATMENT	90 min col-0 treatment	45 min col-0 control	0.1957	0.04234	15	-4.62	0.000331	0.0151084		At1g05790.1	At1g05790.1	lipase class 3 family protein contains Pfam profile PF01764: Lipase [At1g05790.1]
A_84_P10992	TREATMENT	90 min col-0 treatment	45 min col-0 control	-1.2582	0.2724	15	4.62	0.000334	0.0152226		At4g21990.1	At4g21990.1	5'-adenylylsulfate reductase (APR3) / PAPS reductase homolog (PRH26) identical to 5'-adenylylsulfate reductase [Arabidopsis thaliana] GI:2738760; identical to cDNA PAPS reductase homolog (PRH26) GI:1710113 [At4g21990.1]
A_84_P20163	TREATMENT	90 min col-0 treatment	45 min col-0 control	0.5834	0.1264	15	-4.61	0.000337	0.0153364		At2g38400.1	At2g38400.1	alanine--glyoxylate aminotransferase, putative / beta-alanine-pyruvate aminotransferase, putative / AGT, putative similar to SP|Q64565 Alanine--glyoxylate aminotransferase 2, mitochondrial precursor (EC 2.6.1.44) (AGT 2) (Beta-alanine-pyruvate...
A_84_P22933	TREATMENT	90 min col-0 treatment	45 min col-0 control	0.2841	0.06162	15	-4.61	0.00034	0.0154499		At2g41500.1	At2g41500.1	WD-40 repeat family protein / small nuclear ribonucleoprotein Prp4p-related similar to U4/U6 small nuclear ribonucleoprotein hPrp4 (GP:2708305) {Homo sapiens}; contains Pfam PF00400: WD domain, G-beta repeat (7 copies)|19877698|gb|AU238529.1|AU238529...
A_84_P87419	TREATMENT	90 min col-0 treatment	45 min col-0 control	-0.2854	0.06198	15	4.6	0.000344	0.0156084		At3g25290.1	At3g25290.1	auxin-responsive family protein similar to auxin-induced protein AIR12 GI:11357190 [Arabidopsis thaliana] [At3g25290.1]
A_84_P529765	TREATMENT	90 min col-0 treatment	45 min col-0 control	-1.8433	0.4005	15	4.6	0.000345	0.0156306		At3g45110.1	At3g45110.1	hypothetical protein [At3g45110.1]
A_84_P23236	TREATMENT	90 min col-0 treatment	45 min col-0 control	-0.2642	0.05743	15	4.6	0.000347	0.0156966		At4g03230.1	At4g03230.1	S-locus lectin protein kinase family protein contains Pfam domins, PF00069: Protein kinase domain, PF00954: S-locus glycoprotein family and PF01453: Lectin (probable mannose binding) [At4g03230.1]
A_84_P23720	TREATMENT	90 min col-0 treatment	45 min col-0 control	0.3872	0.0842	15	-4.6	0.000348	0.0156966		At1g14030.1	At1g14030.1	ribulose-1,5 bisphosphate carboxylase oxygenase large subunit N-methyltransferase, putative strong similarity to SP|P94026 Ribulose-1,5 bisphosphate carboxylase/oxygenase large subunit N- methyltransferase, chloroplast precursor (EC 2.1.1.127)...
A_84_P613474	TREATMENT	90 min col-0 treatment	45 min col-0 control	0.9859	0.2144	15	-4.6	0.000348	0.0156966		At4g35210.1	At4g35210.1	hypothetical protein contains Pfam profile PF03087: Arabidopsis protein of unknown function [At4g35210.1]
A_84_P13645	TREATMENT	90 min col-0 treatment	45 min col-0 control	-0.2641	0.05748	15	4.59	0.000351	0.0157621		At3g15010.1	At3g15010.1	RNA recognition motif (RRM)-containing protein similar to UBP1 interacting protein 1a [Arabidopsis thaliana] GI:19574236; contains Pfam profile: PF00076 RNA recognition motif. (a.k.a. RRM, RBD, or RNP domain) [At3g15010.1]
A_84_P13420	TREATMENT	90 min col-0 treatment	45 min col-0 control	0.2211	0.04812	15	-4.59	0.000351	0.0157621		At1g29750.1	At1g29750.1	leucine-rich repeat transmembrane protein kinase, putative / serine/threonine kinase, putative (RKF1) similar to receptor-like serine/threonine kinase GI:2465923 from [Arabidopsis thaliana]; identical to cDNA receptor-like serine/threonine kinase...
A_84_P171173	TREATMENT	90 min col-0 treatment	45 min col-0 control	0.3857	0.08392	15	-4.6	0.00035	0.0157621		At1g52710.1	At1g52710.1	cytochrome c oxidase-related similar to SP|P00428 Cytochrome c oxidase polypeptide Vb (EC 1.9.3.1) (VI) [Bovine] {Bos taurus} [At1g52710.1]
A_84_P20566	TREATMENT	90 min col-0 treatment	45 min col-0 control	0.2661	0.05798	15	-4.59	0.000354	0.0158735		At5g07950.1	At5g07950.1	expressed protein ferredoxin (2Fe-2S), Arabidopsis thaliana, PIR:B71412 [At5g07950.1]
A_84_P18652	TREATMENT	90 min col-0 treatment	45 min col-0 control	0.6363	0.1387	15	-4.59	0.000356	0.0159398		At5g01880.1	At5g01880.1	zinc finger (C3HC4-type RING finger) family protein contains Pfam domain, PF00097: Zinc finger, C3HC4 type (RING finger) [At5g01880.1]
A_84_P16582	TREATMENT	90 min col-0 treatment	45 min col-0 control	0.1562	0.03408	15	-4.58	0.000358	0.0159824		At3g59380.1	At3g59380.1	farnesyltransferase alpha subunit, putative / FTA, putative / protein farnesyltransferase, putative similar to farnesyltransferase alpha subunit [GI:2246442][Pisum sativum] [At3g59380.1]
A_84_P22201	TREATMENT	90 min col-0 treatment	45 min col-0 control	0.3425	0.07471	15	-4.58	0.000358	0.0159824		At3g46270.1	At3g46270.1	receptor protein kinase-related contains weak similarity to light repressible receptor protein kinase (GI:1321686) [Arabidopsis thaliana] [At3g46270.1]
A_84_P14294	TREATMENT	90 min col-0 treatment	45 min col-0 control	-0.6283	0.1371	15	4.58	0.00036	0.0160015		At1g63750.1	At1g63750.1	disease resistance protein (TIR-NBS-LRR class), putative domain signature TIR-NBS-LRR exists, suggestive of a disease resistance protein. [At1g63750.1]
A_84_P15094	TREATMENT	90 min col-0 treatment	45 min col-0 control	0.4103	0.08956	15	-4.58	0.00036	0.0160015		At2g17830.1	At2g17830.1	F-box family protein contains Pfam domain, PF00646: F-box domain [At2g17830.1]
A_84_P195794	TREATMENT	90 min col-0 treatment	45 min col-0 control	0.4841	0.1057	15	-4.58	0.00036	0.0160015		At4g19390.1	At4g19390.1	expressed protein [At4g19390.1]
A_84_P15439	TREATMENT	90 min col-0 treatment	45 min col-0 control	-0.6657	0.1454	15	4.58	0.000363	0.0160647		At2g35770.1	At2g35770.1	serine carboxypeptidase S10 family protein similar to Serine carboxypeptidase II precursor (Carboxypeptidase D) (CP-MII) (SP:P08818) [Hordeum vulgare] [At2g35770.1]
A_84_P16745	TREATMENT	90 min col-0 treatment	45 min col-0 control	0.3338	0.07291	15	-4.58	0.000362	0.0160647		At4g15500.1	At4g15500.1	UDP-glucoronosyl/UDP-glucosyl transferase family protein contains Pfam profile: PF00201 UDP-glucoronosyl and UDP-glucosyl transferase [At4g15500.1]
A_84_P613591	TREATMENT	90 min col-0 treatment	45 min col-0 control	0.3449	0.07536	15	-4.58	0.000363	0.0160647		At5g38860.1	At5g38860.1	basic helix-loop-helix (bHLH) family protein contains Pfam profile: PF00010 helix-loop-helix DNA-binding domain [At5g38860.1]
A_84_P23283	TREATMENT	90 min col-0 treatment	45 min col-0 control	-1.7733	0.3876	15	4.58	0.000365	0.0161066		At1g29100.1	At1g29100.1	copper-binding family protein similar to copper homeostasis factor gi:3168840 from Arabidopsis thaliana; contains Pfam profile PF00403: Heavy-metal-associated domain [At1g29100.1]
A_84_P13335	TREATMENT	90 min col-0 treatment	45 min col-0 control	-0.3534	0.07726	15	4.57	0.000365	0.0161066		At1g08280.1	At1g08280.1	glycosyl transferase family 29 protein / sialyltransferase family protein contains Pfam profile: PF00777 sialyltransferase (Glycosyltransferase family 29) [At1g08280.1]
A_84_P539913	TREATMENT	90 min col-0 treatment	45 min col-0 control	-0.9958	0.2178	15	4.57	0.000367	0.0161482		At5g67020.1	At5g67020.1	expressed protein [At5g67020.1]
A_84_P14559	TREATMENT	90 min col-0 treatment	45 min col-0 control	-0.5151	0.1127	15	4.57	0.000367	0.0161482		At3g16180.1	At3g16180.1	proton-dependent oligopeptide transport (POT) family protein contains Pfam profile: PF00854 POT family [At3g16180.1]
A_84_P95069	TREATMENT	90 min col-0 treatment	45 min col-0 control	-0.2891	0.06331	15	4.57	0.000371	0.0162539		At2g22170.1	At2g22170.1	lipid-associated family protein contains PLAT/LH2 (Polycystin-1, Lipoxygenase, Alpha-Toxin/Lipoxygenase homology) domain Pfam:PF01477 [At2g22170.1]
A_84_P16830	TREATMENT	90 min col-0 treatment	45 min col-0 control	0.2542	0.05567	15	-4.57	0.000371	0.0162539		At1g55840.1	At1g55840.1	SEC14 cytosolic factor (SEC14) / phosphoglyceride transfer protein similar to polyphosphoinositide binding protein SEC14 homolog Ssh1p (GB:AAB94598) [Glycine max]; identified in Eur J Biochem 1998 Dec 1;258(2):402-10 as AtSEC14, characterized by...
A_84_P572473	TREATMENT	90 min col-0 treatment	45 min col-0 control	1.4194	0.3108	15	-4.57	0.00037	0.0162539		At4g21920.1	At4g21920.1	expressed protein [At4g21920.1]
A_84_P127291	TREATMENT	90 min col-0 treatment	45 min col-0 control	-0.3955	0.08667	15	4.56	0.000373	0.0162918		At5g62860.1	At5g62860.1	F-box family protein-related contains TIGRFAM TIGR01640: F-box protein interaction domain [At5g62860.1]
A_84_P16711	TREATMENT	90 min col-0 treatment	45 min col-0 control	-0.3572	0.07829	15	4.56	0.000374	0.0162918		TC275044	TC275044	Arabidopsis thaliana AT4g32710 [AY060577]
A_84_P17767	TREATMENT	90 min col-0 treatment	45 min col-0 control	0.6282	0.1377	15	-4.56	0.000374	0.0162918		At5g24490.1	At5g24490.1	30S ribosomal protein, putative similar to SP|P19954 Plastid-specific 30S ribosomal protein 1, chloroplast precursor (CS-S5) (CS5) (S22) (Ribosomal protein 1) (PSRP-1) {Spinacia oleracea}; contains Pfam profile PF02482: Sigma 54 modulation protein /...
A_84_P513083	TREATMENT	90 min col-0 treatment	45 min col-0 control	0.6811	0.1493	15	-4.56	0.000374	0.0162918		At4g35200.1	At4g35200.1	hypothetical protein contains Pfam profile PF03087: Arabidopsis protein of unknown function [At4g35200.1]
A_84_P146179	TREATMENT	90 min col-0 treatment	45 min col-0 control	-0.2215	0.04861	15	4.56	0.000378	0.0164192		TC256360	TC256360	Q6NN02 (Q6NN02) At4g14450, partial (79%) [TC256360]
A_84_P111662	TREATMENT	90 min col-0 treatment	45 min col-0 control	0.243	0.05334	15	-4.56	0.000378	0.0164192		At3g56030.1	At3g56030.1	pentatricopeptide (PPR) repeat-containing protein contains INTERPRO:IPR002885 PPR repeats [At3g56030.1]
A_84_P22426	TREATMENT	90 min col-0 treatment	45 min col-0 control	-0.2411	0.05293	15	4.56	0.000379	0.0164393		TC252586	TC252586	Q8JFY9 (Q8JFY9) EndoU protein, partial (25%) [TC252586]
A_84_P15762	TREATMENT	90 min col-0 treatment	45 min col-0 control	0.548	0.1204	15	-4.55	0.000382	0.0165459		At4g31910.1	At4g31910.1	transferase family protein low similarity to anthranilate N-hydroxycinnamoyl/benzoyltransferase Dianthus caryophyllus GI:3288180, 10-deacetylbaccatin III-10-O-acetyl transferase Taxus cuspidata GI:6746554; contains Pfam profile PF02458 transferase...
A_84_P13361	TREATMENT	90 min col-0 treatment	45 min col-0 control	-0.4738	0.1041	15	4.55	0.000383	0.0165657		At1g69440.1	At1g69440.1	PAZ domain-containing protein / piwi domain-containing protein similar to SP|Q9XGW1 PINHEAD protein (ZWILLE protein) {Arabidopsis thaliana}; contains Pfam profiles PF02171: Piwi domain, PF02170: PAZ domain [At1g69440.1]
A_84_P737632	TREATMENT	90 min col-0 treatment	45 min col-0 control	0.5157	0.1135	15	-4.54	0.000387	0.016715		CHR1:002229083-002229142	CHR1:002229083-002229142	Unknown
A_84_P20230	TREATMENT	90 min col-0 treatment	45 min col-0 control	0.7082	0.1561	15	-4.54	0.000392	0.0168832		At1g26560.1	At1g26560.1	glycosyl hydrolase family 1 protein contains Pfam PF00232 : Glycosyl hydrolase family 1 domain; TIGRFAM TIGR01233: 6-phospho-beta-galactosidase; similar to amygdalin hydrolase isoform AH I precursor (GI:16757966) [Prunus serotina] [At1g26560.1]
A_84_P298164	TREATMENT	90 min col-0 treatment	45 min col-0 control	0.9035	0.1991	15	-4.54	0.000392	0.0168832		At5g65870.1	At5g65870.1	phytosulfokines 5 (PSK5) identical to phytosulfokines 5 (PSK5) from [Arabidopsis thaliana] [At5g65870.1]
A_84_P547884	TREATMENT	90 min col-0 treatment	45 min col-0 control	-1.2986	0.2863	15	4.54	0.000394	0.0169217		At5g64820.1	At5g64820.1	hypothetical protein [At5g64820.1]
A_84_P111422	TREATMENT	90 min col-0 treatment	45 min col-0 control	-0.3789	0.08353	15	4.54	0.000394	0.0169217		At5g66020.1	At5g66020.1	phosphoinositide phosphatase family protein contains similarity to phosphoinositide phosphatase SAC1 [Rattus norvegicus] gi|11095248|gb|AAG29810; contains Pfam domain, PF02383: SacI homology domain; non-consensus AT donor splice site at exon 7, TA...
A_84_P113002	TREATMENT	90 min col-0 treatment	45 min col-0 control	0.4566	0.1007	15	-4.53	0.000395	0.0169408		At4g03150.1	At4g03150.1	expressed protein [At4g03150.1]
A_84_P198484	TREATMENT	90 min col-0 treatment	45 min col-0 control	0.7131	0.1574	15	-4.53	0.000398	0.0170455		At3g10930.1	At3g10930.1	expressed protein [At3g10930.1]
A_84_P290044	TREATMENT	90 min col-0 treatment	45 min col-0 control	-0.2833	0.06255	15	4.53	0.0004	0.017102		At1g31817.1	At1g31817.1	chloroplast 30S ribosomal protein S11, putative contains Pfam profile: PF00411: Ribosomal protein S11 [At1g31817.1]
A_84_P16558	TREATMENT	90 min col-0 treatment	45 min col-0 control	0.4314	0.09529	15	-4.53	0.000401	0.017102		At3g53720.1	At3g53720.1	cation/hydrogen exchanger, putative (CHX20) monovalent cation:proton antiporter family 2 (CPA2) member, PMID:11500563 [At3g53720.1]
A_84_P13771	TREATMENT	90 min col-0 treatment	45 min col-0 control	0.6277	0.1386	15	-4.53	0.000401	0.017102		At4g01430.1	At4g01430.1	nodulin MtN21 family protein similar to MtN21 GI:2598575 (root nodule development) from [Medicago truncatula] [At4g01430.1]
A_84_P163753	TREATMENT	90 min col-0 treatment	45 min col-0 control	0.2512	0.05551	15	-4.52	0.000403	0.0171395		At1g28960.1	At1g28960.1	MutT/nudix family protein similar to coenzyme A diphosphatase [Mus musculus] GI:12746410; contains Pfam profile PF00293: NUDIX domain [At1g28960.1]
A_84_P23679	TREATMENT	90 min col-0 treatment	45 min col-0 control	0.4768	0.1054	15	-4.52	0.000403	0.0171395		At1g80920.1	At1g80920.1	DNAJ heat shock N-terminal domain-containing protein similar to SP|Q05646 Chaperone protein dnaJ Erysipelothrix rhusiopathiae, SP|P45555 Chaperone protein dnaJ (HSP40) Staphylococcus aureus; contains Pfam profile PF00226 DnaJ domain [At1g80920.1]
A_84_P16068	TREATMENT	90 min col-0 treatment	45 min col-0 control	0.6982	0.1544	15	-4.52	0.000405	0.0172005		At1g33790.1	At1g33790.1	jacalin lectin family protein similar to myrosinase binding protein homolog GI:2997767 from [Arabidopsis thaliana]; contains contains Pfam profile PF01419 jacalin-like lectin domain [At1g33790.1]
A_84_P611792	TREATMENT	90 min col-0 treatment	45 min col-0 control	-0.8052	0.1782	15	4.52	0.000408	0.0172083		At5g21482.1	At5g21482.1	cytokinin oxidase, putative (CKX5) contains Pfam profile: PF01565 FAD binding domain; identical to cytokinin oxidase (CKX5) [Arabidopsis thaliana] gi|11120514|gb|AAG30908; similar to Swiss-Prot:Q9LTS3 cytokinin oxidase 3 precursor (CKO 3)[Arabidopsis...
A_84_P565260	TREATMENT	90 min col-0 treatment	45 min col-0 control	-0.6433	0.1423	15	4.52	0.000407	0.0172083		At3g61390.1	At3g61390.1	U-box domain-containing protein several hypothetical proteins - Arabidopsis thaliana [At3g61390.1]
A_84_P738633	TREATMENT	90 min col-0 treatment	45 min col-0 control	-0.3858	0.0854	15	4.52	0.000408	0.0172083		CHR1:002030932-002030991	CHR1:002030932-002030991	Unknown
A_84_P85939	TREATMENT	90 min col-0 treatment	45 min col-0 control	0.3441	0.07616	15	-4.52	0.000408	0.0172083		CHR3:006800656-006800715	CHR3:006800656-006800715	Unknown
A_84_P310373	TREATMENT	90 min col-0 treatment	45 min col-0 control	0.4105	0.09079	15	-4.52	0.000406	0.0172083		At2g28150.1	At2g28150.1	expressed protein [At2g28150.1]
A_84_P266190	TREATMENT	90 min col-0 treatment	45 min col-0 control	-0.4419	0.09792	15	4.51	0.000413	0.0172524		At1g26210.1	At1g26210.1	expressed protein similar to hypothetical protein GI:6524175 from [Arabidopsis thaliana] [At1g26210.1]
A_84_P594615	TREATMENT	90 min col-0 treatment	45 min col-0 control	-0.407	0.09019	15	4.51	0.000412	0.0172524		At3g28550.1	At3g28550.1	proline-rich extensin-like family protein contains proline-rich extensin domains, INTERPRO:IPR002965 [At3g28550.1]
A_84_P20917	TREATMENT	90 min col-0 treatment	45 min col-0 control	-0.2915	0.06456	15	4.52	0.000411	0.0172524		At1g63220.1	At1g63220.1	C2 domain-containing protein similar to phloem protein RPP16 [Oryza sativa (japonica cultivar-group)] GI:21998839; contains Pfam profile PF00168: C2 domain [At1g63220.1]
A_84_P514768	TREATMENT	90 min col-0 treatment	45 min col-0 control	-0.1835	0.04062	15	4.52	0.00041	0.0172524		At4g08500.1	At4g08500.1	mitogen-activated protein kinase kinase, putative similar to mitogen-activated protein kinase MEKK1 GP|1255448 [Arabidopsis thaliana] [At4g08500.1]
A_84_P15554	TREATMENT	90 min col-0 treatment	45 min col-0 control	0.2716	0.06017	15	-4.51	0.000412	0.0172524		At3g22180.1	At3g22180.1	zinc finger (DHHC type) family protein contains Pfam profile PF01529: DHHC zinc finger domain [At3g22180.1]
A_84_P18717	TREATMENT	90 min col-0 treatment	45 min col-0 control	0.2932	0.06497	15	-4.51	0.000413	0.0172524		At1g01110.1	At1g01110.1	expressed protein contains Prosite PS00165: Serine/threonine dehydratases pyridoxal-phosphate attachment site [At1g01110.1]
A_84_P18726	TREATMENT	90 min col-0 treatment	45 min col-0 control	0.3895	0.08629	15	-4.51	0.000412	0.0172524		At5g28080.1	At5g28080.1	protein kinase family protein contains protein kinase domain, Pfam:PF00069 [At5g28080.1]
A_84_P227139	TREATMENT	90 min col-0 treatment	45 min col-0 control	0.2157	0.04781	15	-4.51	0.000414	0.0172705		At1g80630.1	At1g80630.1	leucine-rich repeat family protein [At1g80630.1]
A_84_P172281	TREATMENT	90 min col-0 treatment	45 min col-0 control	-1.4998	0.3327	15	4.51	0.000416	0.0173067		At5g48850.1	At5g48850.1	male sterility MS5 family protein similar to male sterility MS5 [Arabidopsis thaliana] GI:3859112; contains Pfam profile PF00515 TPR Domain [At5g48850.1]
A_84_P22144	TREATMENT	90 min col-0 treatment	45 min col-0 control	-0.4129	0.09158	15	4.51	0.000416	0.0173067		At3g27060.1	At3g27060.1	ribonucleoside-diphosphate reductase small chain, putative / ribonucleotide reductase, putative similar to ribonucleotide reductase R2 [Nicotiana tabacum] GI:1044912; contains Pfam profile PF00268: Ribonucleotide reductase, small chain [At3g27060.1]
A_84_P15580	TREATMENT	90 min col-0 treatment	45 min col-0 control	-0.7098	0.1576	15	4.5	0.000419	0.0174078		At3g46400.1	At3g46400.1	leucine-rich repeat protein kinase, putative similar to light repressible receptor protein kinase [Arabidopsis thaliana] gi|1321686|emb|CAA66376; contains leucine rich repeat (LRR) domains, Pfam:PF00560; contains protein kinase domain, Pfam:PF00069...
A_84_P16460	TREATMENT	90 min col-0 treatment	45 min col-0 control	-0.8202	0.1821	15	4.5	0.00042	0.0174256		At3g21180.1	At3g21180.1	calcium-transporting ATPase, plasma membrane-type, putative / Ca2+-ATPase, putative (ACA9) identical to SP|Q9LU41 Potential calcium-transporting ATPase 9, plasma membrane-type (EC 3.6.3.8) (Ca(2+)-ATPase isoform 9) {Arabidopsis thaliana} [At3g21180.1]
A_84_P19730	TREATMENT	90 min col-0 treatment	45 min col-0 control	-0.2139	0.04753	15	4.5	0.000422	0.0174611		At1g64330.1	At1g64330.1	myosin heavy chain-related similar to myosin heavy chain (GI:1850913) [Entamoeba histolytica]; similar to Intracellular protein transport protein USO1 (Swiss-Prot:P25386) [Saccharomyces cerevisiae] [At1g64330.1]
A_84_P267350	TREATMENT	90 min col-0 treatment	45 min col-0 control	0.4134	0.09182	15	-4.5	0.000422	0.0174611		At3g07500.1	At3g07500.1	far-red impaired responsive family protein / FAR1 family protein weak similarity to far-red impaired response protein [Arabidopsis thaliana] GI:5764395; contains Pfam profile PF03101: FAR1 family [At3g07500.1]
A_84_P100286	TREATMENT	90 min col-0 treatment	45 min col-0 control	-0.3335	0.07412	15	4.5	0.000424	0.0175201		At3g08600.1	At3g08600.1	expressed protein [At3g08600.1]
A_84_P10976	TREATMENT	90 min col-0 treatment	45 min col-0 control	-0.3093	0.06876	15	4.5	0.000425	0.0175377		At1g17560.1	At1g17560.1	ribosomal protein L14 family protein similar to GB:Z98756 from (Mycobacterium leprae) [At1g17560.1]
A_84_P518394	TREATMENT	90 min col-0 treatment	45 min col-0 control	0.3814	0.08485	15	-4.5	0.000427	0.0175965		At4g29560.1	At4g29560.1	expressed protein [At4g29560.1]
A_84_P138739	TREATMENT	90 min col-0 treatment	45 min col-0 control	0.1736	0.03865	15	-4.49	0.00043	0.0176962		At3g12300.1	At3g12300.1	expressed protein [At3g12300.1]
A_84_P23981	TREATMENT	90 min col-0 treatment	45 min col-0 control	1.4247	0.3173	15	-4.49	0.000431	0.0177135		At1g01140.1	At1g01140.1	CBL-interacting protein kinase 9 (CIPK9) identical to CBL-interacting protein kinase 9 [Arabidopsis thaliana] gi|13249117|gb|AAK16684; contains Pfam profiles PF00069: Protein kinase domain and PF03822: NAF domain; identical to cDNA CBL-interacting...
A_84_P703441	TREATMENT	90 min col-0 treatment	45 min col-0 control	-0.6067	0.1354	15	4.48	0.000438	0.017857		CHR4:009679677-009679736	CHR4:009679677-009679736	Unknown
A_84_P23256	TREATMENT	90 min col-0 treatment	45 min col-0 control	-0.4285	0.09555	15	4.48	0.000436	0.017857		At4g10960.1	At4g10960.1	UDP-glucose 4-epimerase, putative / UDP-galactose 4-epimerase, putative / Galactowaldenase, putative similar to UDP-galactose 4-epimerase from Arabidopsis thaliana SP|Q42605, Cyamopsis tetragonoloba GI:3021357 [AJ005082] [At4g10960.1]
A_84_P14657	TREATMENT	90 min col-0 treatment	45 min col-0 control	-0.2843	0.0634	15	4.48	0.000436	0.017857		At3g51470.1	At3g51470.1	protein phosphatase 2C, putative / PP2C, putative protein phosphatase-2C, Mesembryanthemum crystallinum, EMBL:AF075580 [At3g51470.1]
A_84_P12657	TREATMENT	90 min col-0 treatment	45 min col-0 control	0.1836	0.04096	15	-4.48	0.000438	0.017857		At3g02780.1	At3g02780.1	isopentenyl-diphosphate delta-isomerase II / isopentenyl diphosphate:dimethylallyl diphosphate isomerase II (IPP2) identical to isopentenyl diphosphate:dimethylallyl diphosphate isomerase (IPP2) GB:U49259 [Arabidopsis thaliana] [At3g02780.1]
A_84_P17463	TREATMENT	90 min col-0 treatment	45 min col-0 control	0.8009	0.1786	15	-4.48	0.000437	0.017857		At3g44260.1	At3g44260.1	CCR4-NOT transcription complex protein, putative similar to SWISS-PROT:Q9UFF9 CCR4-NOT transcription complex, subunit 8 (CAF1-like protein, CALIFp) [Homo sapiens] [At3g44260.1]
A_84_P23107	TREATMENT	90 min col-0 treatment	45 min col-0 control	1.0523	0.2347	15	-4.48	0.000438	0.017857		At3g24310.1	At3g24310.1	myb family transcription factor similar to myb protein 305 GB:JQ0958 from [garden snapdragon] (Plant Cell (1991) 3 (2), 115-125); [At3g24310.1]
A_84_P11279	TREATMENT	90 min col-0 treatment	45 min col-0 control	0.4711	0.1052	15	-4.48	0.00044	0.0179146		CHR5:026503161-026502760	CHR5:026503161-026502760	Unknown
A_84_P23948	TREATMENT	90 min col-0 treatment	45 min col-0 control	0.343	0.07658	15	-4.48	0.000441	0.0179314		At2g01760.1	At2g01760.1	two-component responsive regulator family protein / response regulator family protein similar to response regulator 9 (GI:14189890) [Zea mays]; similar to ARR1 protein (GI:4210449) [Arabidopsis thaliana]; contains Pfam profile: PF00072 response...
A_84_P713089	TREATMENT	90 min col-0 treatment	45 min col-0 control	0.4246	0.09485	15	-4.48	0.000443	0.0179888		BX832186	BX832186	Arabidopsis thaliana Full-length cDNA Complete sequence from clone GSLTPGH57ZG03 of Hormone Treated Callus of strain col-0 of Arabidopsis thaliana (thale cress) [BX832186]
A_84_P21274	TREATMENT	90 min col-0 treatment	45 min col-0 control	-0.4098	0.09164	15	4.47	0.000448	0.0181196		At1g62950.1	At1g62950.1	leucine-rich repeat transmembrane protein kinase, putative contains protein kinase domains [At1g62950.1]
A_84_P567531	TREATMENT	90 min col-0 treatment	45 min col-0 control	0.2643	0.0591	15	-4.47	0.000448	0.0181196		At1g49170.1	At1g49170.1	expressed protein [At1g49170.1]
A_84_P17862	TREATMENT	90 min col-0 treatment	45 min col-0 control	0.2802	0.06266	15	-4.47	0.000448	0.0181196		At5g58520.1	At5g58520.1	protein kinase family protein contains protein kinase domain, Pfam:PF00069 [At5g58520.1]
A_84_P22932	TREATMENT	90 min col-0 treatment	45 min col-0 control	0.7489	0.1675	15	-4.47	0.000449	0.018136		At2g22770.1	At2g22770.1	basic helix-loop-helix (bHLH) family protein contains Pfam profile: PF00010 helix-loop-helix DNA-binding domain [At2g22770.1]
A_84_P209868	TREATMENT	90 min col-0 treatment	45 min col-0 control	-0.7062	0.158	15	4.47	0.000451	0.0181611		At2g32130.1	At2g32130.1	expressed protein contains Pfam domain, PF04859: Plant protein of unknown function (DUF641) [At2g32130.1]
A_84_P75184	TREATMENT	90 min col-0 treatment	45 min col-0 control	0.3087	0.0691	15	-4.47	0.000452	0.0181611		At4g36050.1	At4g36050.1	endonuclease/exonuclease/phosphatase family protein [At4g36050.1]
A_84_P718618	TREATMENT	90 min col-0 treatment	45 min col-0 control	0.3214	0.07195	15	-4.47	0.000452	0.0181611		CHR4:011860080-011860139	CHR4:011860080-011860139	Unknown
A_84_P598642	TREATMENT	90 min col-0 treatment	45 min col-0 control	0.9186	0.2056	15	-4.47	0.000451	0.0181611		At1g07135.1	At1g07135.1	glycine-rich protein [At1g07135.1]
A_84_P537390	TREATMENT	90 min col-0 treatment	45 min col-0 control	0.1829	0.04102	15	-4.46	0.000459	0.0184181		At1g33250.1	At1g33250.1	fringe-related protein + weak similarity to Fringe [Schistocerca gregaria](GI:6573138);Fringe encodes an extracellular protein that regulates Notch signalling. [At1g33250.1]
A_84_P584092	TREATMENT	90 min col-0 treatment	45 min col-0 control	-1.9475	0.4369	15	4.46	0.000461	0.0184257		At4g28088.1	At4g28088.1	hydrophobic protein, putative / low temperature and salt responsive protein, putative similar to Hydrophobic protein RCI2A (Low temperature and salt responsive protein LTI6A) GI:15214251 [At4g28088.1]
A_84_P10559	TREATMENT	90 min col-0 treatment	45 min col-0 control	-1.2417	0.2786	15	4.46	0.000461	0.0184257		At1g01560.1	At1g01560.1	mitogen-activated protein kinase, putative / MAPK, putative (MPK11) similar to MAP kinase 5 GI:4239889 from [Zea mays]; mitogen-activated protein kinase (MAPK)(AtMPK11), PMID:12119167 [At1g01560.1]
A_84_P11225	TREATMENT	90 min col-0 treatment	45 min col-0 control	-0.6388	0.1433	15	4.46	0.00046	0.0184257		At5g52810.1	At5g52810.1	ornithine cyclodeaminase/mu-crystallin family protein contains Pfam PF02423: Ornithine cyclodeaminase/mu-crystallin family [At5g52810.1]
A_84_P595126	TREATMENT	90 min col-0 treatment	45 min col-0 control	-2.2216	0.4988	15	4.45	0.000464	0.0185129		At1g26360.1	At1g26360.1	hydrolase, alpha/beta fold family protein similar to SP|Q40708 PIR7A protein {Oryza sativa}, ethylene-induced esterase [Citrus sinensis] GI:14279437, polyneuridine aldehyde esterase [Rauvolfia serpentina] GI:6651393; contains Pfam profile PF00561:...
A_84_P16092	TREATMENT	90 min col-0 treatment	45 min col-0 control	0.4053	0.09101	15	-4.45	0.000465	0.0185129		At1g60700.1	At1g60700.1	forkhead-associated domain-containing protein / FHA domain-containing protein contains similarity to nucleolar protein GI:2384719 from [Mus musculus] [At1g60700.1]
A_84_P16355	TREATMENT	90 min col-0 treatment	45 min col-0 control	0.8014	0.18	15	-4.45	0.000465	0.0185129		At2g36180.1	At2g36180.1	calmodulin-related protein, putative similar to calmodulin-related protein 2, touch-induced SP:P25070 from [Arabidopsis thaliana] [At2g36180.1]
A_84_P18793	TREATMENT	90 min col-0 treatment	45 min col-0 control	0.3254	0.07308	15	-4.45	0.000466	0.0185285		At5g54080.1	At5g54080.1	homogentisate 1,2-dioxygenase / homogentisicase/homogentisate oxygenase / homogentisic acid oxidase (HGO) identical to SP|Q9ZRA2 Homogentisate 1,2-dioxygenase (EC 1.13.11.5) (Homogentisicase) (Homogentisate oxygenase) (Homogentisic acid oxidase)...
A_84_P21506	TREATMENT	90 min col-0 treatment	45 min col-0 control	0.2865	0.06438	15	-4.45	0.000468	0.0185597		At5g06850.1	At5g06850.1	C2 domain-containing protein contains INTERPRO:IPR000008 C2 domain [At5g06850.1]
A_84_P13287	TREATMENT	90 min col-0 treatment	45 min col-0 control	0.5885	0.1323	15	-4.45	0.000468	0.0185597		At1g75580.1	At1g75580.1	auxin-responsive protein, putative similar to auxin-induced protein TGSAUR22 (GI:10185820) [Tulipa gesneriana] [At1g75580.1]
A_84_P21632	TREATMENT	90 min col-0 treatment	45 min col-0 control	-0.3576	0.08041	15	4.45	0.00047	0.0186149		At5g54380.1	At5g54380.1	protein kinase family protein contains protein kinase domain, Pfam:PF00069 [At5g54380.1]
A_84_P21034	TREATMENT	90 min col-0 treatment	45 min col-0 control	0.2896	0.06518	15	-4.44	0.000473	0.0186852		At2g47760.1	At2g47760.1	ALG3 family protein contains Pfam profile: PF05208 ALG3 protein [At2g47760.1]
A_84_P231009	TREATMENT	90 min col-0 treatment	45 min col-0 control	0.5724	0.1288	15	-4.44	0.000473	0.0186852		At1g01070.1	At1g01070.1	nodulin MtN21 family protein similar to MtN21 GI:2598575 (root nodule development) from [Medicago truncatula] [At1g01070.1]
A_84_P91299	TREATMENT	90 min col-0 treatment	45 min col-0 control	0.7012	0.1581	15	-4.44	0.000481	0.0189767		At4g33980.1	At4g33980.1	expressed protein [At4g33980.1]
A_84_P143059	TREATMENT	90 min col-0 treatment	45 min col-0 control	-0.3645	0.08218	15	4.44	0.000482	0.0189916		At3g61380.1	At3g61380.1	expressed protein [At3g61380.1]
A_84_P585153	TREATMENT	90 min col-0 treatment	45 min col-0 control	0.3464	0.07813	15	-4.43	0.000483	0.0190065		At5g45740.1	At5g45740.1	hypothetical protein [At5g45740.1]
A_84_P563616	TREATMENT	90 min col-0 treatment	45 min col-0 control	-0.657	0.1483	15	4.43	0.000486	0.0190656		At4g37030.1	At4g37030.1	hypothetical protein [At4g37030.1]
A_84_P20145	TREATMENT	90 min col-0 treatment	45 min col-0 control	-0.4059	0.09161	15	4.43	0.000487	0.0190656		At2g18650.1	At2g18650.1	zinc finger (C3HC4-type RING finger) family protein similar to RING-H2 finger protein RHX1a [Arabidopsis thaliana] GI:3790591; contains Pfam profile PF00097: Zinc finger, C3HC4 type (RING finger) [At2g18650.1]
A_84_P23765	TREATMENT	90 min col-0 treatment	45 min col-0 control	0.1311	0.0296	15	-4.43	0.000486	0.0190656		At1g58220.1	At1g58220.1	myb family transcription factor contains Pfam profile: PF00249: Myb-like DNA-binding domain [At1g58220.1]
A_84_P18451	TREATMENT	90 min col-0 treatment	45 min col-0 control	0.2614	0.05901	15	-4.43	0.000487	0.0190656		At3g53920.1	At3g53920.1	RNA polymerase sigma subunit SigC (sigC) / sigma factor 3 (SIG3) identical to sigma factor SigC [Arabidopsis thaliana] GI:5478585, sigma factor 3 (SIG3) [Arabidopsis thaliana] GI:2353175, plastid RNA polymerase sigma-subunit [Arabidopsis thaliana]...
A_84_P16800	TREATMENT	90 min col-0 treatment	45 min col-0 control	-0.4825	0.1089	15	4.43	0.000488	0.0190803		At5g13990.1	At5g13990.1	exocyst subunit EXO70 family protein contains Pfam domain PF03081: Exo70 exocyst complex subunit; [At5g13990.1]
A_84_P21596	TREATMENT	90 min col-0 treatment	45 min col-0 control	-0.4043	0.09134	15	4.43	0.00049	0.0191095		At5g44530.1	At5g44530.1	subtilase family protein contains Pfam profiles: PF00082 subtilase family [At5g44530.1]
A_84_P588124	TREATMENT	90 min col-0 treatment	45 min col-0 control	0.3824	0.08639	15	-4.43	0.00049	0.0191095		At1g78110.1	At1g78110.1	expressed protein [At1g78110.1]
A_84_P11040	TREATMENT	90 min col-0 treatment	45 min col-0 control	0.3728	0.08424	15	-4.43	0.000491	0.0191241		At4g32880.1	At4g32880.1	homeobox-leucine zipper transcription factor (HB-8) identical to HD-zip transcription factor (athb-8) (GI:7270235) [Arabidopsis thaliana] [At4g32880.1]
A_84_P11273	TREATMENT	90 min col-0 treatment	45 min col-0 control	0.2314	0.05229	15	-4.42	0.000492	0.0191387		At5g64860.1	At5g64860.1	4-alpha-glucanotransferase, putative / disproportionating enzyme, putative similar to 4-alpha-glucanotransferase SP:Q06801 from [Solanum tuberosum] [At5g64860.1]
A_84_P251495	TREATMENT	90 min col-0 treatment	45 min col-0 control	-0.3072	0.06944	15	4.42	0.000493	0.0191433		At3g02640.1	At3g02640.1	expressed protein [At3g02640.1]
A_84_P221496	TREATMENT	90 min col-0 treatment	45 min col-0 control	0.2304	0.05209	15	-4.42	0.000494	0.0191433		At2g02160.1	At2g02160.1	zinc finger (CCCH-type) family protein contains Pfam domain, PF00642: Zinc finger C-x8-C-x5-C-x3-H type (and similar) [At2g02160.1]
A_84_P21800	TREATMENT	90 min col-0 treatment	45 min col-0 control	0.6338	0.1433	15	-4.42	0.000494	0.0191433		At1g70290.1	At1g70290.1	trehalose-6-phosphate synthase, putative similar to Alpha,alpha-trehalose-phosphate synthase [UDP-forming] (EC 2.4.1.15) (Trehalose-6-phosphate synthase) from {Kluyveromyces lactis} SP|Q07158, {Saccharomyces cerevisiae} SP|Q00764; contains Pfam...
A_84_P120842	TREATMENT	90 min col-0 treatment	45 min col-0 control	-1.2161	0.2751	15	4.42	0.000496	0.0191965		NP455165	NP455165	hypothetical protein [Arabidopsis thaliana] [NP455165]
A_84_P11184	TREATMENT	90 min col-0 treatment	45 min col-0 control	-0.6805	0.154	15	4.42	0.000499	0.0192394		At1g72240.1	At1g72240.1	expressed protein [At1g72240.1]
A_84_P582708	TREATMENT	90 min col-0 treatment	45 min col-0 control	0.3547	0.08028	15	-4.42	0.000499	0.0192394		At1g54310.2	At1g54310.2	expressed protein [At1g54310.2]
A_84_P551677	TREATMENT	90 min col-0 treatment	45 min col-0 control	2.3716	0.5368	15	-4.42	0.000498	0.0192394		At2g02320.1	At2g02320.1	F-box family protein / SKP1 interacting partner 3-related contains similarity to SKP1 interacting partner 3 GI:10716951 from [Arabidopsis thaliana] [At2g02320.1]
A_84_P703806	TREATMENT	90 min col-0 treatment	45 min col-0 control	-0.3509	0.0795	15	4.41	0.000503	0.0193692		CHR4:011795213-011795272	CHR4:011795213-011795272	Unknown
A_84_P12439	TREATMENT	90 min col-0 treatment	45 min col-0 control	0.8355	0.1893	15	-4.41	0.000504	0.0193832		At1g68110.1	At1g68110.1	epsin N-terminal homology (ENTH) domain-containing protein / clathrin assembly protein-related similar to clathrin assembly protein AP180 (GI:6492344) [Xenopus laevis]; contains Pfam profile: PF01417 ENTH domain, suggesting involvement in endocytosis...
A_84_P10351	TREATMENT	90 min col-0 treatment	45 min col-0 control	0.463	0.105	15	-4.41	0.000507	0.0194252		At5g20380.1	At5g20380.1	transporter-related low similarity to vesicular glutamate transporter 3 [Rattus norvegicus] GI:21685382 [At5g20380.1]
A_84_P588319	TREATMENT	90 min col-0 treatment	45 min col-0 control	0.5512	0.125	15	-4.41	0.000507	0.0194252		At3g15250.1	At3g15250.1	expressed protein ; expression supported by MPSS [At3g15250.1]
A_84_P23180	TREATMENT	90 min col-0 treatment	45 min col-0 control	0.5963	0.1352	15	-4.41	0.000506	0.0194252		At3g53800.1	At3g53800.1	armadillo/beta-catenin repeat family protein contains Pfam profile: PF00514 armadillo/beta-catenin-like repeat [At3g53800.1]
A_84_P14856	TREATMENT	90 min col-0 treatment	45 min col-0 control	0.5201	0.118	15	-4.41	0.000509	0.0194774		At4g16480.1	At4g16480.1	sugar transporter family protein similar to SP|Q96QE2 Proton myo-inositol co-transporter (Hmit) [Homo sapiens]; contains Pfam profile PF00083: major facilitator superfamily protein [At4g16480.1]
A_84_P19513	TREATMENT	90 min col-0 treatment	45 min col-0 control	-0.2813	0.06388	15	4.4	0.000513	0.0196059		At4g24830.1	At4g24830.1	arginosuccinate synthase family contains Pfam profile: PF00764 arginosuccinate synthase [At4g24830.1]
A_84_P23452	TREATMENT	90 min col-0 treatment	45 min col-0 control	-0.3274	0.07437	15	4.4	0.000515	0.0196577		At5g27330.1	At5g27330.1	expressed protein [At5g27330.1]
A_84_P24114	TREATMENT	90 min col-0 treatment	45 min col-0 control	-0.3094	0.07032	15	4.4	0.000517	0.0197094		At3g51160.1	At3g51160.1	GDP-D-mannose-4,6-dehydratase (MUR1) almost identical to GDP-D-mannose-4,6-dehydratase (MUR1) GI:1764100 from [Arabidopsis thaliana] [At3g51160.1]
A_84_P524541	TREATMENT	90 min col-0 treatment	45 min col-0 control	-0.3385	0.07703	15	4.39	0.000523	0.0198145		At4g11350.1	At4g11350.1	fringe-related protein various hypothetical proteins from Arabidopsis thaliana strong similarity to unknown protein (pir||T13026) similarity to predicted proteins + similar to hypothetical protein GB:AAC23643 [Arabidopsis thaliana] + weak similarity...
A_84_P592414	TREATMENT	90 min col-0 treatment	45 min col-0 control	0.2933	0.06672	15	-4.4	0.000522	0.0198145		At1g10800.1	At1g10800.1	hypothetical protein [At1g10800.1]
A_84_P170233	TREATMENT	90 min col-0 treatment	45 min col-0 control	0.3547	0.0807	15	-4.4	0.000521	0.0198145		At2g38000.1	At2g38000.1	chaperone protein dnaJ-related weak similarity to Chaperone protein dnaJ (Swiss-Prot:Q9ZFC5) [Methylovorus sp.] [At2g38000.1]
A_84_P16477	TREATMENT	90 min col-0 treatment	45 min col-0 control	0.3891	0.08854	15	-4.4	0.000522	0.0198145		At3g26590.1	At3g26590.1	MATE efflux family protein similar to ripening regulated protein DDTFR18 [Lycopersicon esculentum] GI:12231296; contains Pfam profile: PF01554 uncharacterized membrane protein family [At3g26590.1]
A_84_P245175	TREATMENT	90 min col-0 treatment	45 min col-0 control	0.8186	0.1863	15	-4.39	0.000523	0.0198145		At2g47450.1	At2g47450.1	chloroplast signal recognition particle component (CAO) nearly identical to CAO [Arabidopsis thaliana] GI:4102582 [At2g47450.1]
A_84_P14029	TREATMENT	90 min col-0 treatment	45 min col-0 control	0.8065	0.1836	15	-4.39	0.000525	0.0198656		At5g44440.1	At5g44440.1	FAD-binding domain-containing protein similar to SP|P30986 reticuline oxidase precursor (Berberine-bridge-forming enzyme) (BBE) (Tetrahydroprotoberberine synthase) [Eschscholzia californica]; contains PF01565 FAD binding domain [At5g44440.1]
A_84_P718186	TREATMENT	90 min col-0 treatment	45 min col-0 control	-0.9048	0.2063	15	4.39	0.000531	0.0199199		CHR1:012584976-012584917	CHR1:012584976-012584917	Unknown
A_84_P557959	TREATMENT	90 min col-0 treatment	45 min col-0 control	0.2326	0.05301	15	-4.39	0.000529	0.0199199		At2g31600.2	At2g31600.2	expressed protein [At2g31600.2]
A_84_P183594	TREATMENT	90 min col-0 treatment	45 min col-0 control	0.3359	0.07656	15	-4.39	0.000529	0.0199199		At4g36970.1	At4g36970.1	remorin family protein contains Pfam domain, PF03763: Remorin, C-terminal region [At4g36970.1]
A_84_P259140	TREATMENT	90 min col-0 treatment	45 min col-0 control	0.3508	0.07996	15	-4.39	0.00053	0.0199199		At1g28050.1	At1g28050.1	zinc finger (B-box type) family protein [At1g28050.1]
A_84_P612623	TREATMENT	90 min col-0 treatment	45 min col-0 control	0.4465	0.1018	15	-4.39	0.000531	0.0199199		At5g05360.2	At5g05360.2	expressed protein similar to unknown protein (pir||T02500) [At5g05360.2]
A_84_P83349	TREATMENT	90 min col-0 treatment	45 min col-0 control	0.5143	0.1172	15	-4.39	0.000528	0.0199199		At1g26800.1	At1g26800.1	zinc finger (C3HC4-type RING finger) family protein contains Pfam profile: PF00097 zinc finger, C3HC4 type (RING finger) [At1g26800.1]
A_84_P14132	TREATMENT	90 min col-0 treatment	45 min col-0 control	0.8664	0.1975	15	-4.39	0.000531	0.0199199		At5g20420.1	At5g20420.1	SNF2 domain-containing protein / helicase domain-containing protein low similarity to SP|Q9U7E0 Transcriptional regulator ATRX homolog {Caenorhabditis elegans}; contains PFam profiles PF00271: Helicase conserved C-terminal domain, PF00176: SNF2 family...
A_84_P523896	TREATMENT	90 min col-0 treatment	45 min col-0 control	1.2964	0.2959	15	-4.38	0.000536	0.0200828		At5g50335.1	At5g50335.1	expressed protein [At5g50335.1]
A_84_P301440	TREATMENT	90 min col-0 treatment	45 min col-0 control	-0.1279	0.02918	15	4.38	0.000537	0.0200956		At1g31910.1	At1g31910.1	GHMP kinase family protein contains TIGRFAM profile TIGR01219: phosphomevalonate kinase; contains Pfam PF00288: GHMP kinases putative ATP-binding protein domain; similar to Phosphomevalonate kinase (EC 2.7.4.2) (Swiss-Prot:P24521) [Saccharomyces...
A_84_P23052	TREATMENT	90 min col-0 treatment	45 min col-0 control	0.2651	0.06056	15	-4.38	0.00054	0.0201584		At3g10700.1	At3g10700.1	GHMP kinase family protein contains Pfam profile: PF00288 GHMP kinases putative ATP-binding proteins [At3g10700.1]
A_84_P512722	TREATMENT	90 min col-0 treatment	45 min col-0 control	0.2758	0.06301	15	-4.38	0.00054	0.0201584		At2g25690.1	At2g25690.1	senescence-associated protein-related similar to senescence-associated protein SAG102 (GI:22331931) [Arabidopsis thaliana] [At2g25690.1]
A_84_P15168	TREATMENT	90 min col-0 treatment	45 min col-0 control	1.3982	0.3195	15	-4.38	0.000542	0.0202084		At1g05300.1	At1g05300.1	metal transporter, putative (ZIP5) identical to putative metal transporter ZIP5 [Arabidopsis thaliana] gi|17385784|gb|AAL38432; similar to zinc transporter protein ZIP1 [Glycine max] gi|15418778|gb|AAK37761; member of the Zinc (Zn2+)-Iron (Fe2+)...
A_84_P103616	TREATMENT	90 min col-0 treatment	45 min col-0 control	0.5579	0.1275	15	-4.38	0.000543	0.020221		At1g59980.1	At1g59980.1	DNAJ heat shock N-terminal domain-containing protein similar to Altered Response to Gravity [Arabidopsis thaliana] GI:4249662; contains Pfam profile PF00226 DnaJ domain [At1g59980.1]
A_84_P20461	TREATMENT	90 min col-0 treatment	45 min col-0 control	-0.7866	0.1799	15	4.37	0.000546	0.020234		At4g25250.1	At4g25250.1	invertase/pectin methylesterase inhibitor family protein similar to pectinesterase from Arabidopsis thaliana SP|Q42534, Lycopersicon esculentum SP|Q43143; contains Pfam profile PF04043: Plant invertase/pectin methylesterase inhibitor [At4g25250.1]
A_84_P87269	TREATMENT	90 min col-0 treatment	45 min col-0 control	-0.5373	0.1229	15	4.37	0.000546	0.020234		At5g02220.1	At5g02220.1	expressed protein [At5g02220.1]
A_84_P172541	TREATMENT	90 min col-0 treatment	45 min col-0 control	0.213	0.04869	15	-4.37	0.000545	0.020234		At4g24500.1	At4g24500.1	hydroxyproline-rich glycoprotein family protein [At4g24500.1]
A_84_P10124	TREATMENT	90 min col-0 treatment	45 min col-0 control	0.6229	0.1424	15	-4.37	0.000545	0.020234		At4g14560.1	At4g14560.1	auxin-responsive protein / indoleacetic acid-induced protein 1 (IAA1) identical to SP|P49677 Auxin-responsive protein IAA1 (Indoleacetic acid-induced protein 1) {Arabidopsis thaliana} [At4g14560.1]
A_84_P14437	TREATMENT	90 min col-0 treatment	45 min col-0 control	0.6373	0.1458	15	-4.37	0.000547	0.0202465		At2g04240.1	At2g04240.1	zinc finger (C3HC4-type RING finger) family protein contains Pfam profile: PF00097 zinc finger, C3HC4 type (RING finger) [At2g04240.1]
A_84_P187914	TREATMENT	90 min col-0 treatment	45 min col-0 control	-0.3881	0.08882	15	4.37	0.00055	0.0203083		At3g58620.1	At3g58620.1	tetratricopeptide repeat (TPR)-containing protein contains Pfam profile PF00515 TPR Domain [At3g58620.1]
A_84_P16164	TREATMENT	90 min col-0 treatment	45 min col-0 control	-0.1833	0.04196	15	4.37	0.00055	0.0203083		At1g77840.1	At1g77840.1	eukaryotic translation initiation factor 5, putative / eIF-5, putative similar to SP|P55876 Eukaryotic translation initiation factor 5 (eIF-5) {Zea mays}; contains Pfam profiles PF02020: eIF4-gamma/eIF5/eIF2-epsilon, PF01873: Domain found in IF2B/IF5...
A_84_P257020	TREATMENT	90 min col-0 treatment	45 min col-0 control	0.2081	0.04766	15	-4.37	0.000553	0.0203944		At3g63000.1	At3g63000.1	NPL4 family protein contains Pfam domain, PF05021: NPL4 family [At3g63000.1]
A_84_P20376	TREATMENT	90 min col-0 treatment	45 min col-0 control	0.3811	0.08729	15	-4.37	0.000554	0.0204066		At3g61970.1	At3g61970.1	DNA-binding protein, putative similar to DNA-binding proteins from [Arabidopsis thaliana] RAV1 GI:3868857 and RAV2 GI:3868859, AP2 domain containing protein RAP2.8 [Arabidopsis thaliana] GI:2281641; contains Pfam profile PF02362: B3 DNA binding domain...
A_84_P17618	TREATMENT	90 min col-0 treatment	45 min col-0 control	-0.6727	0.1543	15	4.36	0.00056	0.0205286		At4g24160.1	At4g24160.1	hydrolase, alpha/beta fold family protein contains Pfam profile PF00561: hydrolase, alpha/beta fold family [At4g24160.1]
A_84_P10048	TREATMENT	90 min col-0 treatment	45 min col-0 control	-0.4007	0.09189	15	4.36	0.000559	0.0205286		At1g29050.1	At1g29050.1	expressed protein similar to hypothetical protein GB:AAB67625 GI:2342727 from [Arabidopsis thaliana] [At1g29050.1]
A_84_P13930	TREATMENT	90 min col-0 treatment	45 min col-0 control	0.3452	0.07917	15	-4.36	0.00056	0.0205286		At5g03770.1	At5g03770.1	3-deoxy-D-manno-octulosonic acid transferase-related similar to 3-deoxy-D-manno-octulosonic acid transferase, Escherichia coli, PIR:JU0467; contains Pfam profile PF04413: 3-Deoxy-D-manno-octulosonic-acid transferase (kdotransferase) [At5g03770.1]
A_84_P17451	TREATMENT	90 min col-0 treatment	45 min col-0 control	3.968	0.9102	15	-4.36	0.00056	0.0205286		At3g28320.1	At3g28320.1	hypothetical protein similar to At14a (GI:11994571 and GI:11994573) [Arabidopsis thaliana] [At3g28320.1]
A_84_P20081	TREATMENT	90 min col-0 treatment	45 min col-0 control	-0.4249	0.09753	15	4.36	0.000564	0.020601		At2g28620.1	At2g28620.1	kinesin motor protein-related [At2g28620.1]
A_84_P304400	TREATMENT	90 min col-0 treatment	45 min col-0 control	0.2477	0.05685	15	-4.36	0.000563	0.020601		At5g05800.1	At5g05800.1	expressed protein [At5g05800.1]
A_84_P21757	TREATMENT	90 min col-0 treatment	45 min col-0 control	0.3507	0.0805	15	-4.36	0.000564	0.020601		At1g31040.1	At1g31040.1	zinc-binding protein-related simialr to zinc-binding protein [Pisum sativum] GI:16117799 [At1g31040.1]
A_84_P294174	TREATMENT	90 min col-0 treatment	45 min col-0 control	-0.2742	0.06295	15	4.36	0.000565	0.0206129		At1g69810.1	At1g69810.1	WRKY family transcription factor [At1g69810.1]
A_84_P95346	TREATMENT	90 min col-0 treatment	45 min col-0 control	0.3955	0.09083	15	-4.35	0.000567	0.0206612		At5g52970.1	At5g52970.1	thylakoid lumen 15.0 kDa protein SP:Q9LVV5; similar to unknown protein (pir |S77462) [At5g52970.1]
A_84_P18691	TREATMENT	90 min col-0 treatment	45 min col-0 control	0.4728	0.1086	15	-4.35	0.000568	0.020673		At5g13740.1	At5g13740.1	sugar transporter family protein contains Pfam profile PF00083: major facilitator superfamily protein [At5g13740.1]
A_84_P22296	TREATMENT	90 min col-0 treatment	45 min col-0 control	-0.4201	0.09653	15	4.35	0.00057	0.0207211		At4g05010.1	At4g05010.1	F-box family protein contains Pfam PF00646: F-box domain; similar to late embryogenesis abundant protein (GI:1350541) (PIR|T09287) {Picea glauca} [At4g05010.1]
A_84_P20246	TREATMENT	90 min col-0 treatment	45 min col-0 control	0.4126	0.09487	15	-4.35	0.000572	0.020769		At3g19860.1	At3g19860.1	basic helix-loop-helix (bHLH) family protein contains Pfam profile: PF00010 helix-loop-helix DNA-binding domain [At3g19860.1]
A_84_P19681	TREATMENT	90 min col-0 treatment	45 min col-0 control	-0.8568	0.1971	15	4.35	0.000574	0.0207791		CHR5:015216310-015216251	CHR5:015216310-015216251	Unknown
A_84_P183034	TREATMENT	90 min col-0 treatment	45 min col-0 control	0.3543	0.08151	15	-4.35	0.000575	0.0207791		At3g19520.1	At3g19520.1	expressed protein contains Pfam profile PF04776: Protein of unknown function (DUF626) [At3g19520.1]
A_84_P107092	TREATMENT	90 min col-0 treatment	45 min col-0 control	0.3976	0.09147	15	-4.35	0.000575	0.0207791		At1g69050.1	At1g69050.1	expressed protein [At1g69050.1]
A_84_P20143	TREATMENT	90 min col-0 treatment	45 min col-0 control	1.5201	0.3497	15	-4.35	0.000575	0.0207791		At2g43890.1	At2g43890.1	polygalacturonase, putative / pectinase, putative similar to SP|P48979 Polygalacturonase precursor (EC 3.2.1.15) (PG) (Pectinase) {Prunus persica}; contains Pfam profile PF00295: Glycosyl hydrolases family 28 (polygalacturonases) [At2g43890.1]
A_84_P613104	TREATMENT	90 min col-0 treatment	45 min col-0 control	-0.4739	0.1092	15	4.34	0.000581	0.0209711		At2g23130.2	At2g23130.2	arabinogalactan-protein (AGP17) identical to gi_11935086_gb_AAG41963 [At2g23130.2]
A_84_P19199	TREATMENT	90 min col-0 treatment	45 min col-0 control	-0.2486	0.05729	15	4.34	0.000584	0.0210297		At2g17650.1	At2g17650.1	AMP-dependent synthetase and ligase family protein similar to AMP-binding protein GI:1903034 from [Brassica napus]; contains Pfam AMP-binding domain PF00501; identical to cDNA adenosine monophosphate binding protein 2 AMPBP2 (AMPBP2) GI:20799712...
A_84_P118932	TREATMENT	90 min col-0 treatment	45 min col-0 control	0.4026	0.09278	15	-4.34	0.000584	0.0210297		At1g46264.1	At1g46264.1	heat shock transcription factor family protein contains Pfam profile: PF00447 HSF-type DNA-binding domain [At1g46264.1]
A_84_P16914	TREATMENT	90 min col-0 treatment	45 min col-0 control	0.258	0.05946	15	-4.34	0.000585	0.0210409		At5g57840.1	At5g57840.1	transferase family protein similar to anthranilate N-hydroxycinnamoyl/benzoyltransferase from Dianthus caryophyllus [gi:2239091] [At5g57840.1]
A_84_P500668	TREATMENT	90 min col-0 treatment	45 min col-0 control	-0.6338	0.1462	15	4.34	0.000589	0.0211599		At5g01225.1	At5g01225.1	hypothetical protein [At5g01225.1]
A_84_P13786	TREATMENT	90 min col-0 treatment	45 min col-0 control	0.1391	0.03213	15	-4.33	0.000594	0.0213144		At1g06010.1	At1g06010.1	expressed protein [At1g06010.1]
A_84_P18305	TREATMENT	90 min col-0 treatment	45 min col-0 control	-0.3822	0.08831	15	4.33	0.000597	0.0213826		At3g02230.1	At3g02230.1	reversibly glycosylated polypeptide-1 (RGP1) identical to reversibly glycosylated polypeptide-1 (AtRGP) [Arabidopsis thaliana] GI:2317729 [At3g02230.1]
A_84_P307830	TREATMENT	90 min col-0 treatment	45 min col-0 control	-0.2171	0.05017	15	4.33	0.000598	0.0213826		At2g26570.1	At2g26570.1	expressed protein contains Pfam profile PF05701: Plant protein of unknown function (DUF827); weak similarity to merozoite surface protein 3 alpha (GI:27596802) [Plasmodium vivax] [At2g26570.1]
A_84_P12223	TREATMENT	90 min col-0 treatment	45 min col-0 control	0.2372	0.05481	15	-4.33	0.000598	0.0213826		At5g66130.1	At5g66130.1	cell cycle checkpoint protein-related weak similarity to cell cycle checkpoint protein RAD17 [Homo sapiens] GI:4102916 [At5g66130.1]
A_84_P14810	TREATMENT	90 min col-0 treatment	45 min col-0 control	-0.4482	0.1036	15	4.33	0.000599	0.0213933		At4g30490.1	At4g30490.1	AFG1-like ATPase family protein contains Pfam profile: PF03969 AFG1-like ATPase [At4g30490.1]
A_84_P94599	TREATMENT	90 min col-0 treatment	45 min col-0 control	-1.263	0.2922	15	4.32	0.000603	0.021511		At3g56290.1	At3g56290.1	expressed protein [At3g56290.1]
A_84_P13524	TREATMENT	90 min col-0 treatment	45 min col-0 control	-0.6626	0.1533	15	4.32	0.000605	0.0215571		At2g44110.1	At2g44110.1	seven transmembrane MLO family protein / MLO-like protein 15 (MLO15) identical to MLO-like protein 15 (AtMlo15) SP:O80580 from [Arabidopsis thaliana]; similar to MLO protein SWISS-PROT:P93766, NCBI_gi:1877221 [Hordeum vulgare][Barley] [At2g44110.1]
A_84_P22916	TREATMENT	90 min col-0 treatment	45 min col-0 control	0.8301	0.1922	15	-4.32	0.00061	0.0217099		At2g22190.1	At2g22190.1	trehalose-6-phosphate phosphatase, putative similar to trehalose-6-phosphate phosphatase (AtTPPB) [Arabidopsis thaliana] GI:2944180; contains Pfam profile PF02358: Trehalose-phosphatase [At2g22190.1]
A_84_P233559	TREATMENT	90 min col-0 treatment	45 min col-0 control	-0.5252	0.1217	15	4.32	0.000612	0.0217305		At1g10340.1	At1g10340.1	ankyrin repeat family protein contains ankyrin repeat domains, Pfam:PF00023 [At1g10340.1]
A_84_P249845	TREATMENT	90 min col-0 treatment	45 min col-0 control	-0.3375	0.07819	15	4.32	0.000612	0.0217305		At3g46870.1	At3g46870.1	pentatricopeptide (PPR) repeat-containing protein contains Pfam profile PF01535: PPR repeat [At3g46870.1]
A_84_P566510	TREATMENT	90 min col-0 treatment	45 min col-0 control	1.0544	0.2444	15	-4.31	0.000615	0.0218116		At2g36560.1	At2g36560.1	DNA-binding protein-related contains Pfam domain PF03479: Domain of unknown function (DUF296), found in AT-hook motifs Pfam:PF02178 [At2g36560.1]
A_84_P13961	TREATMENT	90 min col-0 treatment	45 min col-0 control	-1.4579	0.3382	15	4.31	0.000618	0.0218926		At5g13320.1	At5g13320.1	auxin-responsive GH3 family protein similar to auxin-responsive GH3 product [Glycine max] GI:18591; contains Pfam profile PF03321: GH3 auxin-responsive promoter [At5g13320.1]
A_84_P585099	TREATMENT	90 min col-0 treatment	45 min col-0 control	-1.4722	0.3417	15	4.31	0.00062	0.021938		At5g24200.1	At5g24200.1	expressed protein ; expression supported by MPSS [At5g24200.1]
A_84_P240325	TREATMENT	90 min col-0 treatment	45 min col-0 control	-0.8405	0.1951	15	4.31	0.000621	0.021948		At1g68795.1	At1g68795.1	CLE12 CLAVATA3/ESR-Related 12 [At1g68795.1]
A_84_P17168	TREATMENT	90 min col-0 treatment	45 min col-0 control	-0.3397	0.07889	15	4.31	0.000623	0.0219932		At1g76700.1	At1g76700.1	DNAJ heat shock N-terminal domain-containing protein similar to SP|P39101 CAJ1 protein, Saccharomyces cerevisiae; contains Pfam profile PF00226 DnaJ domain [At1g76700.1]
A_84_P14582	TREATMENT	90 min col-0 treatment	45 min col-0 control	0.4883	0.1134	15	-4.3	0.000626	0.0220736		At3g12730.1	At3g12730.1	myb family transcription factor contains Pfam profile: PF00249 myb-like DNA-binding domain [At3g12730.1]
A_84_P11835	TREATMENT	90 min col-0 treatment	45 min col-0 control	-0.3896	0.09058	15	4.3	0.00063	0.022189		At3g54180.1	At3g54180.1	cell division control protein 2 homolog B (CDC2B) identical to cell division control protein 2 homolog B [Arabidopsis thaliana] SWISS-PROT:P25859 [At3g54180.1]
A_84_P18723	TREATMENT	90 min col-0 treatment	45 min col-0 control	0.2192	0.05097	15	-4.3	0.000631	0.0221986		At5g27450.1	At5g27450.1	mevalonate kinase (MK) identical to mevalonate kinase [Arabidopsis thaliana] SWISS-PROT:P46086 [At5g27450.1]
A_84_P15586	TREATMENT	90 min col-0 treatment	45 min col-0 control	0.2881	0.06701	15	-4.3	0.000632	0.0222082		At3g47630.1	At3g47630.1	expressed protein [At3g47630.1]
A_84_P185604	TREATMENT	90 min col-0 treatment	45 min col-0 control	0.328	0.0763	15	-4.3	0.000634	0.0222529		CHR1:005968812-005968753	CHR1:005968812-005968753	Unknown
A_84_P10309	TREATMENT	90 min col-0 treatment	45 min col-0 control	0.2641	0.06147	15	-4.3	0.000636	0.0222974		At1g01800.1	At1g01800.1	short-chain dehydrogenase/reductase (SDR) family protein similar to carbonyl reductase GI:1049108 from [Mus musculus] [At1g01800.1]
A_84_P527481	TREATMENT	90 min col-0 treatment	45 min col-0 control	0.2583	0.06012	15	-4.3	0.000637	0.0223069		At5g61300.1	At5g61300.1	expressed protein [At5g61300.1]
A_84_P143169	TREATMENT	90 min col-0 treatment	45 min col-0 control	-0.225	0.05241	15	4.29	0.00064	0.0223863		At4g14960.1	At4g14960.1	tubulin alpha-6 chain (TUA6) nearly identical to SP|P29511 Tubulin alpha-6 chain {Arabidopsis thaliana} [At4g14960.1]
A_84_P724562	TREATMENT	90 min col-0 treatment	45 min col-0 control	-0.538	0.1254	15	4.29	0.000646	0.0224767		CHR5:006727499-006727440	CHR5:006727499-006727440	Unknown
A_84_P18595	TREATMENT	90 min col-0 treatment	45 min col-0 control	-0.356	0.08301	15	4.29	0.000647	0.0224767		At4g30800.1	At4g30800.1	40S ribosomal protein S11 (RPS11B) ribosomal protein S11, Arabidopsis thaliana,PIR2:C35542 [At4g30800.1]
A_84_P184644	TREATMENT	90 min col-0 treatment	45 min col-0 control	-0.2707	0.06311	15	4.29	0.000645	0.0224767		At5g04930.1	At5g04930.1	phospholipid-transporting ATPase 1 / aminophospholipid flippase 1 / magnesium-ATPase 1 (ALA1) nearly identical to SP|P98204 Phospholipid-transporting ATPase 1 (EC 3.6.3.1) (Aminophospholipid flippase 1) {Arabidopsis thaliana}; contains InterPro...
A_84_P290554	TREATMENT	90 min col-0 treatment	45 min col-0 control	-0.2579	0.06014	15	4.29	0.000647	0.0224767		At3g14740.1	At3g14740.1	PHD finger family protein similar to zinc-finger protein BR140 [PIR|JC2069][Homo sapiens]; contains PHD-finger domain PF00628 [At3g14740.1]
A_84_P204178	TREATMENT	90 min col-0 treatment	45 min col-0 control	0.2153	0.05019	15	-4.29	0.000644	0.0224767		At2g44150.1	At2g44150.1	SET domain-containing protein (ASHH3) low similarity to huntingtin interacting protein 1 [Homo sapiens] GI:12697196; contains Pfam profile PF00856: SET domain; identical to cDNA ASH1-like protein 3 (ASHH3) partial cds GI:15488419 [At2g44150.1]
A_84_P23999	TREATMENT	90 min col-0 treatment	45 min col-0 control	0.4043	0.09424	15	-4.29	0.000645	0.0224767		At3g11750.1	At3g11750.1	dihydroneopterin aldolase, putative similar to SP|P28823 Dihydroneopterin aldolase (EC 4.1.2.25) (DHNA) {Bacillus subtilis}; contains Pfam profile PF02152: dihydroneopterin aldolase [At3g11750.1]
A_84_P10050	TREATMENT	90 min col-0 treatment	45 min col-0 control	0.2748	0.06414	15	-4.28	0.000651	0.0225387		At4g23060.1	At4g23060.1	calmodulin-binding family protein contains Pfam profile PF00612: IQ calmodulin-binding motif [At4g23060.1]
A_84_P303380	TREATMENT	90 min col-0 treatment	45 min col-0 control	0.3673	0.08571	15	-4.29	0.000651	0.0225387		At5g19540.1	At5g19540.1	expressed protein [At5g19540.1]
A_84_P725023	TREATMENT	90 min col-0 treatment	45 min col-0 control	0.6951	0.1622	15	-4.29	0.00065	0.0225387		AV537537	AV537537	AV537537 Arabidopsis thaliana roots Columbia Arabidopsis thaliana cDNA clone RZ08c04F 3', mRNA sequence [AV537537]
A_84_P16774	TREATMENT	90 min col-0 treatment	45 min col-0 control	0.1847	0.04312	15	-4.28	0.000654	0.0226169		At5g06140.1	At5g06140.1	phox (PX) domain-containing protein similar to SP|O60749 Sorting nexin 2 {Homo sapiens}; contains Pfam profile PF00787: PX domain [At5g06140.1]
A_84_P14179	TREATMENT	90 min col-0 treatment	45 min col-0 control	-0.2351	0.05492	15	4.28	0.000657	0.022695		At1g06410.1	At1g06410.1	glycosyl transferase family 20 protein / trehalose-phosphatase family protein contains Pfam profile: PF02358 trehalose-phosphatase [At1g06410.1]
A_84_P152278	TREATMENT	90 min col-0 treatment	45 min col-0 control	-0.3655	0.08541	15	4.28	0.000659	0.0227127		At1g72470.1	At1g72470.1	exocyst subunit EXO70 family protein contains Pfam domain PF03081: Exo70 exocyst complex subunit; [At1g72470.1]
A_84_P15395	TREATMENT	90 min col-0 treatment	45 min col-0 control	-0.2085	0.04872	15	4.28	0.000659	0.0227127		At1g07790.1	At1g07790.1	histone H2B, putative strong similarity to histone H2B Arabidopsis thaliana GI:2407802, Gossypium hirsutum SP|O22582, Lycopersicon esculentum GI:3021489, Capsicum annuum SP|O49118; contains Pfam profile PF00125 Core histone H2A/H2B/H3/H4 [At1g07790.1]
A_84_P275080	TREATMENT	90 min col-0 treatment	45 min col-0 control	-0.2428	0.05675	15	4.28	0.00066	0.0227215		At3g61130.1	At3g61130.1	glycosyl transferase family 8 protein contains Pfam profile: PF01501 glycosyl transferase family 8 [At3g61130.1]
A_84_P14347	TREATMENT	90 min col-0 treatment	45 min col-0 control	0.3364	0.07867	15	-4.28	0.000663	0.0227991		At1g13450.1	At1g13450.1	DNA binding protein GT-1 identical to DNA binding protein GT-1 GI:598073 from [Arabidopsis thaliana] [At1g13450.1]
A_84_P23709	TREATMENT	90 min col-0 treatment	45 min col-0 control	0.4172	0.09758	15	-4.28	0.000664	0.0228078		At1g03130.1	At1g03130.1	photosystem I reaction center subunit II, chloroplast, putative / photosystem I 20 kDa subunit, putative / PSI-D, putative (PSAD2) similar to SP|P12353 Photosystem I reaction center subunit II, chloroplast precursor (Photosystem I 20 kDa subunit)...
A_84_P599045	TREATMENT	90 min col-0 treatment	45 min col-0 control	-0.7168	0.1677	15	4.27	0.000666	0.0228251		At3g19320.1	At3g19320.1	leucine-rich repeat family protein contains leucine-rich repeats, Pfam:PF00560; [At3g19320.1]
A_84_P18586	TREATMENT	90 min col-0 treatment	45 min col-0 control	0.269	0.06295	15	-4.27	0.000666	0.0228251		At4g28830.1	At4g28830.1	expressed protein [At4g28830.1]
A_84_P12793	TREATMENT	90 min col-0 treatment	45 min col-0 control	0.4157	0.09729	15	-4.27	0.000667	0.0228337		At3g57190.1	At3g57190.1	peptide chain release factor, putative similar to SP|P07012 Peptide chain release factor 2 (RF-2) {Escherichia coli}; contains Pfam profile PF03462: PCRF domain [At3g57190.1]
A_84_P13804	TREATMENT	90 min col-0 treatment	45 min col-0 control	-0.3746	0.08772	15	4.27	0.000671	0.022945		At4g12420.1	At4g12420.1	multi-copper oxidase, putative (SKU5) identical to multi-copper oxidase-related protein (SKU5)(GI:18158154) [Arabidopsis thaliana]; similar to pollen-specific protein precursor - common tobacco, PIR2:S22495; contains Pfam profile: PF00394 Multicopper...
A_84_P542948	TREATMENT	90 min col-0 treatment	45 min col-0 control	-0.6196	0.1451	15	4.27	0.000673	0.0229619		At2g46150.1	At2g46150.1	expressed protein and genefinder [At2g46150.1]
A_84_P78009	TREATMENT	90 min col-0 treatment	45 min col-0 control	0.6305	0.1477	15	-4.27	0.000673	0.0229619		At5g66052.1	At5g66052.1	expressed protein [At5g66052.1]
A_84_P547046	TREATMENT	90 min col-0 treatment	45 min col-0 control	-0.3943	0.09245	15	4.27	0.000678	0.0231067		At5g41315.1	At5g41315.1	basic helix-loop-helix (bHLH) family protein contains Pfam profile: PF00010 helix-loop-helix DNA-binding domain ;annotation temporarily based on supporting cDNA gi|17224394|gb|AF246291.1|AF246291 [At5g41315.1]
A_84_P13393	TREATMENT	90 min col-0 treatment	45 min col-0 control	-1.0451	0.2451	15	4.26	0.000679	0.023115		At1g66090.1	At1g66090.1	disease resistance protein (TIR-NBS class), putative domain signature TIR-NBS exists, suggestive of a disease resistance protein. [At1g66090.1]
A_84_P258110	TREATMENT	90 min col-0 treatment	45 min col-0 control	-1.2714	0.2983	15	4.26	0.000683	0.0231994		At1g65800.1	At1g65800.1	S-receptor protein kinase, putative similar to PIR|T05180|T05180 S-receptor kinase ARK3 precursor - [Arabidopsis thaliana] [At1g65800.1]
A_84_P15903	TREATMENT	90 min col-0 treatment	45 min col-0 control	0.3711	0.08709	15	-4.26	0.000683	0.0231994		At5g39820.1	At5g39820.1	no apical meristem (NAM) family protein contains Pfam PF02365: No apical meristem (NAM) domain; NAC domain protein NAM, Arabidopsis thaliana, gb:AAD17313 [At5g39820.1]
A_84_P97826	TREATMENT	90 min col-0 treatment	45 min col-0 control	-0.3208	0.07536	15	4.26	0.000689	0.0233772		At1g55170.1	At1g55170.1	expressed protein [At1g55170.1]
A_84_P73944	TREATMENT	90 min col-0 treatment	45 min col-0 control	0.449	0.1055	15	-4.26	0.00069	0.0233852		At4g22190.1	At4g22190.1	expressed protein [At4g22190.1]
A_84_P17703	TREATMENT	90 min col-0 treatment	45 min col-0 control	-0.7259	0.1707	15	4.25	0.000694	0.0234168		At5g01210.1	At5g01210.1	transferase family protein contains Pfam profile PF02458 transferase family [At5g01210.1]
A_84_P16838	TREATMENT	90 min col-0 treatment	45 min col-0 control	0.3371	0.07923	15	-4.25	0.000693	0.0234168		At5g36170.1	At5g36170.1	peptide chain release factor, putative similar to SP|P28367 Peptide chain release factor 2 (RF-2) {Bacillus subtilis}; contains Pfam profiles PF00472: Peptidyl-tRNA hydrolase domain, PF03462: PCRF domain [At5g36170.1]
A_84_P22689	TREATMENT	90 min col-0 treatment	45 min col-0 control	0.3633	0.0854	15	-4.25	0.000694	0.0234168		At1g13910.1	At1g13910.1	leucine-rich repeat family protein contains leucine rich-repeat (LRR) domains Pfam:PF00560, INTERPRO:IPR001611; contains similarity to Hcr2-0A [Lycopersicon esculentum] gi|3894385|gb|AAC78592 [At1g13910.1]
A_84_P608547	TREATMENT	90 min col-0 treatment	45 min col-0 control	0.607	0.1427	15	-4.25	0.000693	0.0234168		At1g64870.1	At1g64870.1	hypothetical protein [At1g64870.1]
A_84_P153348	TREATMENT	90 min col-0 treatment	45 min col-0 control	-0.8227	0.1936	15	4.25	0.000699	0.0234817		NP454056	NP454056	hypothetical protein [Arabidopsis thaliana] [NP454056]
A_84_P88169	TREATMENT	90 min col-0 treatment	45 min col-0 control	-0.3827	0.09004	15	4.25	0.000699	0.0234817		At3g13160.1	At3g13160.1	pentatricopeptide (PPR) repeat-containing protein contains Pfam profile PF01535: PPR repeat [At3g13160.1]
A_84_P732707	TREATMENT	90 min col-0 treatment	45 min col-0 control	0.4688	0.1103	15	-4.25	0.000699	0.0234817		CHR4:005251956-005252015	CHR4:005251956-005252015	Unknown
A_84_P10609	TREATMENT	90 min col-0 treatment	45 min col-0 control	2.2966	0.5402	15	-4.25	0.000697	0.0234817		At2g24850.1	At2g24850.1	aminotransferase, putative similar to nicotianamine aminotransferase from Hordeum vulgare [GI:6498122, GI:6469087]; contains Pfam profile PF00155 aminotransferase, classes I and II [At2g24850.1]
A_84_P17628	TREATMENT	90 min col-0 treatment	45 min col-0 control	0.8516	0.2005	15	-4.25	0.000701	0.023523		At4g26200.1	At4g26200.1	1-aminocyclopropane-1-carboxylate synthase, putative / ACC synthase, putative similar to ACC synthase from Malus x domestica, GI:1658062 [U73816], Pyrus pyrifolia GI:4586411 [At4g26200.1]
A_84_P17499	TREATMENT	90 min col-0 treatment	45 min col-0 control	-0.3942	0.09281	15	4.25	0.000703	0.0235384		At3g52800.1	At3g52800.1	zinc finger (AN1-like) family protein contains Pfam domain, PF01428: AN1-like Zinc finger [At3g52800.1]
A_84_P13018	TREATMENT	90 min col-0 treatment	45 min col-0 control	0.4457	0.1049	15	-4.25	0.000703	0.0235384		At5g13910.1	At5g13910.1	AP2/EREBP-like transcription factor LEAFY PETIOLE, putative nearly identical to AP2/EREBP-like transcription factor LEAFY PETIOLE [Arabidopsis thaliana] GI:6942018 [At5g13910.1]
A_84_P16750	TREATMENT	90 min col-0 treatment	45 min col-0 control	-0.2326	0.05478	15	4.25	0.000704	0.023546		At4g16970.1	At4g16970.1	protein kinase family protein contains protein kinase domain, Pfam:PF00069 [At4g16970.1]
A_84_P10211	TREATMENT	90 min col-0 treatment	45 min col-0 control	0.3691	0.08696	15	-4.24	0.000706	0.0235871		At5g26820.1	At5g26820.1	ferroportin-related low similarity to ferroportin1 [Danio rerio] GI:7109245 [At5g26820.1]
A_84_P714510	TREATMENT	90 min col-0 treatment	45 min col-0 control	0.5031	0.1185	15	-4.24	0.000707	0.0235947		CHR3:000313872-000313931	CHR3:000313872-000313931	Unknown
A_84_P18933	TREATMENT	90 min col-0 treatment	45 min col-0 control	-0.3725	0.08783	15	4.24	0.00071	0.0236432		At1g24170.1	At1g24170.1	glycosyl transferase family 8 protein contains Pfam profile: PF01501 glycosyl transferase family 8 [At1g24170.1]
A_84_P93379	TREATMENT	90 min col-0 treatment	45 min col-0 control	0.2276	0.05365	15	-4.24	0.00071	0.0236432		At3g22430.1	At3g22430.1	expressed protein [At3g22430.1]
A_84_P20781	TREATMENT	90 min col-0 treatment	45 min col-0 control	-0.496	0.1169	15	4.24	0.000711	0.0236506		At1g02205.1	At1g02205.1	CER1 protein identical to maize gl1 homolog (glossy1 locus) GI:1209703 and CER1 GI:1199467 from [Arabidopsis thaliana] [At1g02205.1]
A_84_P23278	TREATMENT	90 min col-0 treatment	45 min col-0 control	-0.3862	0.09117	15	4.24	0.000718	0.0238575		At4g20260.1	At4g20260.1	DREPP plasma membrane polypeptide family protein contains Pfam profile: PF05558 DREPP plasma membrane polypeptide [At4g20260.1]
A_84_P552133	TREATMENT	90 min col-0 treatment	45 min col-0 control	0.4406	0.104	15	-4.23	0.00072	0.023898		At5g10625.1	At5g10625.1	expressed protein [At5g10625.1]
A_84_P220848	TREATMENT	90 min col-0 treatment	45 min col-0 control	-1.0257	0.2424	15	4.23	0.000725	0.023908		At4g29180.1	At4g29180.1	leucine-rich repeat protein kinase, putative similar to light repressible receptor protein kinase [Arabidopsis thaliana] gi|1321686|emb|CAA66376; contains leucine rich repeat (LRR) domains, Pfam:PF00560; contains protein kinase domain, Pfam:PF00069...
A_84_P17807	TREATMENT	90 min col-0 treatment	45 min col-0 control	-0.2962	0.06996	15	4.23	0.000722	0.023908		At5g43080.1	At5g43080.1	cyclin, putative similar to A-type cyclins from [Nicotiana tabacum] GI:1064931, [Catharanthus roseus] GI:2190259; contains Pfam profiles PF00134: Cyclin, N-terminal domain, PF02984: Cyclin, C-terminal domain [At5g43080.1]
A_84_P10573	TREATMENT	90 min col-0 treatment	45 min col-0 control	-0.2434	0.05749	15	4.23	0.000723	0.023908		At1g13580.1	At1g13580.1	longevity-assurance (LAG1) family protein similar to Alternaria stem canker resistance protein (ASC1) [Lycopersicon esculentum] GI:7688742; contains Pfam profile PF03798: Longevity-assurance protein (LAG1) [At1g13580.1]
A_84_P95896	TREATMENT	90 min col-0 treatment	45 min col-0 control	0.3129	0.07393	15	-4.23	0.000724	0.023908		At1g53800.1	At1g53800.1	expressed protein [At1g53800.1]
A_84_P195044	TREATMENT	90 min col-0 treatment	45 min col-0 control	0.3981	0.09404	15	-4.23	0.000723	0.023908		At1g09575.1	At1g09575.1	expressed protein contains Pfam domain, PF04678: Protein of unknown function, DUF607 [At1g09575.1]
A_84_P142939	TREATMENT	90 min col-0 treatment	45 min col-0 control	0.4174	0.09863	15	-4.23	0.000725	0.023908		At3g01560.1	At3g01560.1	proline-rich family protein contains proline rich extensin domains, INTERPRO:IPR002965 [At3g01560.1]
A_84_P152498	TREATMENT	90 min col-0 treatment	45 min col-0 control	-0.3136	0.07414	15	4.23	0.000728	0.0239623		At3g16570.1	At3g16570.1	rapid alkalinization factor (RALF) family protein similar to RALF precursor [Nicotiana tabacum] GI:16566316 [At3g16570.1]
A_84_P577849	TREATMENT	90 min col-0 treatment	45 min col-0 control	0.4594	0.1086	15	-4.23	0.000729	0.0239623		At4g33770.1	At4g33770.1	inositol 1,3,4-trisphosphate 5/6-kinase family protein contains Pfam doamin PF05770 Inositol 1, 3, 4-trisphosphate 5/6-kinase; contains weak similarity to inositol phosphate kinase (GI:27549256) [Zea mays] [At4g33770.1]
A_84_P719271	TREATMENT	90 min col-0 treatment	45 min col-0 control	0.4674	0.1105	15	-4.23	0.000729	0.0239623		CHR1:023967394-023967335	CHR1:023967394-023967335	Unknown
A_84_P224479	TREATMENT	90 min col-0 treatment	45 min col-0 control	0.2137	0.05055	15	-4.23	0.00073	0.0239693		At5g16650.1	At5g16650.1	DNAJ heat shock N-terminal domain-containing protein similar to SP|P30725 Chaperone protein dnaJ Clostridium acetobutylicum; contains Pfam profile PF00226: DnaJ domain [At5g16650.1]
A_84_P253555	TREATMENT	90 min col-0 treatment	45 min col-0 control	0.5422	0.1283	15	-4.23	0.000731	0.0239764		At4g14090.1	At4g14090.1	UDP-glucoronosyl/UDP-glucosyl transferase family protein contains Pfam profile: PF00201 UDP-glucoronosyl and UDP-glucosyl transferase ;similar to UDP-glucose:anthocyanin 5-O-glucosyltransferase GI:4115563 from [Verbena x hybrida] [At4g14090.1]
A_84_P13726	TREATMENT	90 min col-0 treatment	45 min col-0 control	0.5099	0.1206	15	-4.23	0.000733	0.0240162		At3g54420.1	At3g54420.1	class IV chitinase (CHIV) almost identical to class IV chitinase from GI:2597826 [Arabidopsis thaliana] [At3g54420.1]
A_84_P19967	TREATMENT	90 min col-0 treatment	45 min col-0 control	-1.3083	0.3097	15	4.22	0.000735	0.0240559		At1g55640.1	At1g55640.1	prenylated rab acceptor (PRA1) family protein weak similarity to prenylated Rab acceptor 1 (PRA1) [Homo sapiens] GI:4877285; contains Pfam profile PF03208: Prenylated rab acceptor (PRA1) [At1g55640.1]
A_84_P98316	TREATMENT	90 min col-0 treatment	45 min col-0 control	-0.1943	0.05664	195	3.43	0.000737	0.0240956		At2g20760.1	At2g20760.1	expressed protein [At2g20760.1]
A_84_P294164	TREATMENT	90 min col-0 treatment	45 min col-0 control	0.4739	0.1122	15	-4.22	0.000738	0.0241024		At4g18370.1	At4g18370.1	protease HhoA, chloroplast (SPPA) (HHOA) identical to SP|Q9SEL7 Protease HhoA, chloroplast precursor (EC 3.4.21.-) {Arabidopsis thaliana} [At4g18370.1]
A_84_P159915	TREATMENT	90 min col-0 treatment	45 min col-0 control	-0.4827	0.1144	15	4.22	0.000741	0.0241299		At4g27970.1	At4g27970.1	C4-dicarboxylate transporter/malic acid transport family protein contains Pfam profile PF03595: C4-dicarboxylate transporter/malic acid transport protein [At4g27970.1]
A_84_P189974	TREATMENT	90 min col-0 treatment	45 min col-0 control	0.2534	0.06004	15	-4.22	0.000742	0.0241299		At5g21920.1	At5g21920.1	YGGT family protein contains Pfam profile PF02325: YGGT family (unknown function); supported by full length cDNA GI:22531282 from [Arabidopsis thaliana] [At5g21920.1]
A_84_P13959	TREATMENT	90 min col-0 treatment	45 min col-0 control	0.2797	0.06627	15	-4.22	0.000742	0.0241299		At5g12130.1	At5g12130.1	integral membrane TerC family protein contains Pfam profile PF03741: Integral membrane protein TerC family [At5g12130.1]
A_84_P13256	TREATMENT	90 min col-0 treatment	45 min col-0 control	0.7576	0.1795	15	-4.22	0.00074	0.0241299		At1g60470.1	At1g60470.1	galactinol synthase, putative similar to galactinol synthase GI:5608497 from [Ajuga reptans] [At1g60470.1]
A_84_P19369	TREATMENT	90 min col-0 treatment	45 min col-0 control	-0.6018	0.1426	15	4.22	0.000743	0.0241367		At3g47500.1	At3g47500.1	Dof-type zinc finger domain-containing protein identical to H-protein promoter binding factor-2a GI:3386546 from [Arabidopsis thaliana] [At3g47500.1]
A_84_P531612	TREATMENT	90 min col-0 treatment	45 min col-0 control	-0.7153	0.1697	15	4.22	0.000748	0.0242733		At4g04745.1	At4g04745.1	expressed protein [At4g04745.1]
A_84_P16904	TREATMENT	90 min col-0 treatment	45 min col-0 control	0.1621	0.03845	15	-4.22	0.000749	0.0242799		At1g50170.1	At1g50170.1	expressed protein similar to Cbi protein (GI:3724039) [Bacillus megaterium]; similar to YlnE protein (GI:2462961) [Bacillus subtilis]; similar to NirR (GI:4433637) [Staphylococcus carnosus] [At1g50170.1]
A_84_P602463	TREATMENT	90 min col-0 treatment	45 min col-0 control	-0.3632	0.08621	15	4.21	0.000752	0.0243255		At2g27430.1	At2g27430.1	expressed protein [At2g27430.1]
A_84_P23686	TREATMENT	90 min col-0 treatment	45 min col-0 control	0.4472	0.1061	15	-4.21	0.000752	0.0243255		At1g75700.1	At1g75700.1	abscisic acid-responsive HVA22 family protein weak similarity to SP|Q00765 Polyposis locus protein 1 (TB2 protein) {Homo sapiens}; contains Pfam profile PF03134: TB2/DP1, HVA22 family [At1g75700.1]
A_84_P72594	TREATMENT	90 min col-0 treatment	45 min col-0 control	0.3814	0.0906	15	-4.21	0.000757	0.0244613		At2g30960.1	At2g30960.1	expressed protein [At2g30960.1]
A_84_P20747	TREATMENT	90 min col-0 treatment	45 min col-0 control	-0.4984	0.1184	15	4.21	0.00076	0.0245323		At5g17050.1	At5g17050.1	UDP-glucoronosyl/UDP-glucosyl transferase family protein similar to UDP glucose:flavonoid 3-o-glucosyltransferase, Vitis vinifera, EMBL:AF000372 [At5g17050.1]
A_84_P11714	TREATMENT	90 min col-0 treatment	45 min col-0 control	-1.9685	0.468	15	4.21	0.000763	0.0246032		At3g04210.1	At3g04210.1	disease resistance protein (TIR-NBS class), putative domain signature TIR-NBS exists, suggestive of a disease resistance protein. [At3g04210.1]
A_84_P596076	TREATMENT	90 min col-0 treatment	45 min col-0 control	0.5217	0.1241	15	-4.2	0.000765	0.0246416		At1g53250.1	At1g53250.1	expressed protein [At1g53250.1]
A_84_P591336	TREATMENT	90 min col-0 treatment	45 min col-0 control	-0.6535	0.1554	15	4.2	0.000766	0.0246478		At5g25280.2	At5g25280.2	serine-rich protein-related contains some similarity to serine-rich proteins [At5g25280.2]
A_84_P19911	TREATMENT	90 min col-0 treatment	45 min col-0 control	-0.6546	0.1557	15	4.2	0.000768	0.0246602		At1g09170.1	At1g09170.1	kinesin motor protein-related similar to GB:AAB61066 [At1g09170.1]
A_84_P528977	TREATMENT	90 min col-0 treatment	45 min col-0 control	-0.6262	0.149	15	4.2	0.000768	0.0246602		At4g14650.1	At4g14650.1	expressed protein [At4g14650.1]
A_84_P11458	TREATMENT	90 min col-0 treatment	45 min col-0 control	-0.4118	0.098	15	4.2	0.00077	0.0246985		At1g80270.1	At1g80270.1	DNA-binding protein, putative similar to DNA-binding protein [Triticum aestivum] GI:6958202; contains Pfam profile: PF01535 PPR repeat [At1g80270.1]
A_84_P83479	TREATMENT	90 min col-0 treatment	45 min col-0 control	-1.6181	0.3853	15	4.2	0.000773	0.0247687		At2g10940.1	At2g10940.1	protease inhibitor/seed storage/lipid transfer protein (LTP) family protein similar to proline-rich cell wall protein [Medicago sativa] GI:3818416; contains Pfam profile PF00234 Protease inhibitor/seed storage/LTP family [At2g10940.1]
A_84_P69014	TREATMENT	90 min col-0 treatment	45 min col-0 control	0.4602	0.1096	15	-4.2	0.000774	0.0247747		At5g51390.1	At5g51390.1	expressed protein similar to unknown protein (gb|AAB68039.1) [At5g51390.1]
A_84_P282640	TREATMENT	90 min col-0 treatment	45 min col-0 control	1.3485	0.3213	15	-4.2	0.000777	0.0248447		At2g23170.1	At2g23170.1	auxin-responsive GH3 family protein similar to auxin-responsive GH3 product [Glycine max] GI:18591; contains Pfam profile PF03321: GH3 auxin-responsive promoter [At2g23170.1]
A_84_P586382	TREATMENT	90 min col-0 treatment	45 min col-0 control	0.6125	0.146	15	-4.2	0.000779	0.0248826		At2g05330.1	At2g05330.1	speckle-type POZ protein-related contains Pfam PF00651 : BTB/POZ domain [At2g05330.1]
A_84_P13332	TREATMENT	90 min col-0 treatment	45 min col-0 control	0.4937	0.1177	15	-4.2	0.00078	0.0248885		At1g22570.1	At1g22570.1	proton-dependent oligopeptide transport (POT) family protein contains Pfam profile: PF00854 POT family [At1g22570.1]
A_84_P12336	TREATMENT	90 min col-0 treatment	45 min col-0 control	-0.3792	0.0904	15	4.19	0.000781	0.0248944		At1g10040.1	At1g10040.1	expressed protein non-consensus GC donor splice site at exon boundary 21576 [At1g10040.1]
A_84_P15715	TREATMENT	90 min col-0 treatment	45 min col-0 control	0.2484	0.05925	15	-4.19	0.000786	0.0250016		At4g21350.1	At4g21350.1	U-box domain-containing protein similar to immediate-early fungal elicitor protein CMPG1 [Petroselinum crispum] GI:14582198; contains Pfam profile PF04564: U-box domain [At4g21350.1]
A_84_P217138	TREATMENT	90 min col-0 treatment	45 min col-0 control	0.4105	0.09794	15	-4.19	0.000786	0.0250016		At3g53460.1	At3g53460.1	29 kDa ribonucleoprotein, chloroplast / RNA-binding protein cp 29 nearly identical to SP|Q43349 29 kDa ribonucleoprotein, chloroplast precursor (RNA-binding protein cp29) {Arabidopsis thaliana} [At3g53460.1]
A_84_P541541	TREATMENT	90 min col-0 treatment	45 min col-0 control	0.4641	0.1108	15	-4.19	0.000788	0.0250391		At5g20640.1	At5g20640.1	hypothetical protein contains Pfam profile PF04525: Protein of unknown function (DUF567) [At5g20640.1]
A_84_P529548	TREATMENT	90 min col-0 treatment	45 min col-0 control	-1.2387	0.2958	15	4.19	0.000792	0.025114		At2g16890.2	At2g16890.2	UDP-glucoronosyl/UDP-glucosyl transferase family protein contains Pfam profile: PF00201 UDP-glucoronosyl and UDP-glucosyl transferase [At2g16890.2]
A_84_P22792	TREATMENT	90 min col-0 treatment	45 min col-0 control	0.4387	0.1048	15	-4.19	0.000792	0.025114		At1g14890.1	At1g14890.1	invertase/pectin methylesterase inhibitor family protein similar to pectinesterase GB:X85216 GI:732912 SP|Q43111 [Phaseolus vulgaris], SP|Q42534 from Arabidopsis thaliana; contains Pfam profile PF04043: Plant invertase/pectin methylesterase inhibitor...
A_84_P14150	TREATMENT	90 min col-0 treatment	45 min col-0 control	-0.3073	0.07346	15	4.18	0.000799	0.0253096		At5g04130.1	At5g04130.1	DNA topoisomerase, ATP-hydrolyzing, putative / DNA topoisomerase II, putative / DNA gyrase, putative similar to SP|O50627 DNA gyrase subunit B (EC 5.99.1.3) {Bacillus halodurans}; contains Pfam profiles PF02518: ATPase, histidine kinase-, DNA gyrase...
A_84_P572987	TREATMENT	90 min col-0 treatment	45 min col-0 control	0.1867	0.04464	15	-4.18	0.000802	0.0253784		At1g79070.1	At1g79070.1	SNARE-associated protein-related contains weak similarity to SNARE-associated protein snapin [Mus musculus] gi|4206090|gb|AAD11418 [At1g79070.1]
A_84_P13591	TREATMENT	90 min col-0 treatment	45 min col-0 control	-0.3331	0.07968	15	4.18	0.000804	0.0254153		At3g03250.1	At3g03250.1	UTP--glucose-1-phosphate uridylyltransferase, putative / UDP-glucose pyrophosphorylase, putative / UGPase, putative strong similarity to SP|P19595 UTP--glucose-1-phosphate uridylyltransferase (EC 2.7.7.9) (UDP-glucose pyrophosphorylase) (UDPGP)...
A_84_P11738	TREATMENT	90 min col-0 treatment	45 min col-0 control	0.2925	0.07005	15	-4.18	0.000812	0.0256416		At3g25560.1	At3g25560.1	protein kinase family protein contains Prosite:PS00108: Serine/Threonine protein kinases active-site signature and PS00107: Protein kinases ATP-binding region signature [At3g25560.1]
A_84_P16953	TREATMENT	90 min col-0 treatment	45 min col-0 control	-1.9085	0.4574	15	4.17	0.000817	0.0257729		At5g66890.1	At5g66890.1	disease resistance protein (CC-NBS-LRR class), putative domain signature NBS-LRR exists, suggestive of a disease resistance protein. [At5g66890.1]
A_84_P727289	TREATMENT	90 min col-0 treatment	45 min col-0 control	0.8633	0.207	15	-4.17	0.00082	0.0258408		CHR4:012686801-012686742	CHR4:012686801-012686742	Unknown
A_84_P521683	TREATMENT	90 min col-0 treatment	45 min col-0 control	0.5027	0.1206	15	-4.17	0.000822	0.0258771		At2g46970.1	At2g46970.1	basic helix-loop-helix (bHLH) protein, putative similar to PIF3 like basic Helix Loop Helix protein (PIL1) [Arabidopsis thaliana] GI:22535492; contains Myc-type, 'helix-loop-helix' dimerization domain signature, PROSITE:PS00038 [At2g46970.1]
A_84_P122352	TREATMENT	90 min col-0 treatment	45 min col-0 control	-0.4656	0.1118	15	4.17	0.000828	0.0259857		At2g19880.1	At2g19880.1	ceramide glucosyltransferase, putative similar to ceramide glucosyltransferase (GI:14718995) [Gossypium arboreum]; weak similarity to Ceramide glucosyltransferase (Glucosylceramide synthase) (GCS) (UDP-glucose:N-acylsphingosine D-glucosyltransferase)...
A_84_P181764	TREATMENT	90 min col-0 treatment	45 min col-0 control	0.1966	0.04719	15	-4.17	0.000827	0.0259857		At3g19630.1	At3g19630.1	radical SAM domain-containing protein similar to florfenicol resistance protein [Staphylococcus sciuri] GI:9909980; contains Pfam profile PF04055: radical SAM domain protein [At3g19630.1]
A_84_P97856	TREATMENT	90 min col-0 treatment	45 min col-0 control	0.4041	0.09699	15	-4.17	0.000828	0.0259857		At2g06030.1	At2g06030.1	expressed protein [At2g06030.1]
A_84_P24179	TREATMENT	90 min col-0 treatment	45 min col-0 control	-0.8676	0.2083	15	4.16	0.000831	0.026053		At4g02390.1	At4g02390.1	poly (ADP-ribose) polymerase / NAD(+) ADP-ribosyltransferase / poly[ADP-ribose] synthetase (APP) identical to SP|Q11207 Poly [ADP-ribose] polymerase (EC 2.4.2.30) (PARP) (ADPRT) (NAD(+) ADP- ribosyltransferase) (Poly[ADP-ribose] synthetase)...
A_84_P14348	TREATMENT	90 min col-0 treatment	45 min col-0 control	0.6139	0.1475	15	-4.16	0.000832	0.0260576		At1g13700.1	At1g13700.1	glucosamine/galactosamine-6-phosphate isomerase family protein similar to SP|O95336 6-phosphogluconolactonase (EC 3.1.1.31) (6PGL) {Homo sapiens}; contains Pfam profile PF01182: Glucosamine-6-phosphate isomerase/6-phosphogluconolactonase [At1g13700.1]
A_84_P12845	TREATMENT	90 min col-0 treatment	45 min col-0 control	-0.4435	0.1065	15	4.16	0.000834	0.0260935		At4g08930.1	At4g08930.1	thioredoxin-related contains weak similarity to Swiss-Prot:Q39239 thioredoxin H-type 4 (TRX-H-4). [Mouse-ear cress] [At4g08930.1]
A_84_P13998	TREATMENT	90 min col-0 treatment	45 min col-0 control	-0.2737	0.06579	15	4.16	0.000838	0.0261918		At5g33290.1	At5g33290.1	exostosin family protein contains Pfam profile: PF03016 Exostosin family [At5g33290.1]
A_84_P21922	TREATMENT	90 min col-0 treatment	45 min col-0 control	1.1705	0.2815	15	-4.16	0.000841	0.0262587		At1g12740.1	At1g12740.1	cytochrome P450 family protein similar to Cytochrome P450 90A1 (SP:Q42569) [Arabidopsis thaliana] [At1g12740.1]
A_84_P15756	TREATMENT	90 min col-0 treatment	45 min col-0 control	0.3079	0.07405	15	-4.16	0.000842	0.0262631		At4g30520.1	At4g30520.1	leucine-rich repeat family protein / protein kinase family protein contains Pfam domains PF00560: Leucine Rich Repeat and PF00069: Protein kinase domain [At4g30520.1]
A_84_P18075	TREATMENT	90 min col-0 treatment	45 min col-0 control	0.8525	0.2052	15	-4.15	0.000848	0.0264232		At1g70510.1	At1g70510.1	homeobox protein knotted-1 like 2 (KNAT2) (K1) identical to homeobox protein knotted-1 like 2 ( KNAT2/ ATK1) SP: from [Arabidopsis thaliana] [At1g70510.1]
A_84_P22853	TREATMENT	90 min col-0 treatment	45 min col-0 control	0.947	0.2281	15	-4.15	0.000851	0.0264897		At1g75960.1	At1g75960.1	AMP-binding protein, putative similar to AMP-binding protein GI:1903034 from [Brassica napus]; contains Pfam profile: PF00501 AMP-binding enzyme; identical to cDNA adenosine monophosphate binding protein 8 AMPBP8 (AMPBP8) GI:20799724 [At1g75960.1]
A_84_P13053	TREATMENT	90 min col-0 treatment	45 min col-0 control	0.315	0.07591	15	-4.15	0.000855	0.0265871		At5g33280.1	At5g33280.1	chloride channel-like (CLC) protein, putative similar to CLC-c, At5g49890 [Arabidopsis thaliana] and chloride channel protein ClC-1 - Nicotiana tabacum, PIR:T02939 [At5g33280.1]
A_84_P228379	TREATMENT	90 min col-0 treatment	45 min col-0 control	-0.3122	0.07526	15	4.15	0.000858	0.0266532		At3g16857.2	At3g16857.2	two-component responsive regulator family protein / response regulator family protein contains Pfam profile: PF00072 response regulator receiver domain; similar to ARR1 protein GB:BAA74528 from [Arabidopsis thaliana] (Plant Cell Physiol. (1998) 39...
A_84_P14982	TREATMENT	90 min col-0 treatment	45 min col-0 control	-0.8183	0.1973	15	4.15	0.000861	0.026669		NP236893	NP236893	disease resistance protein-like [NP236893]
A_84_P12206	TREATMENT	90 min col-0 treatment	45 min col-0 control	-0.3735	0.09009	15	4.15	0.000862	0.026669		At5g61810.1	At5g61810.1	mitochondrial substrate carrier family protein similar to peroxisomal Ca-dependent solute carrier, Oryctolagus cuniculus,GI:2352427; contains INTERPRO:IPR001993 Mitochondrial substrate carrier family, INTERPRO:IPR002048 calcium-binding EF-hand domain...
A_84_P129836	TREATMENT	90 min col-0 treatment	45 min col-0 control	-0.1437	0.03464	15	4.15	0.00086	0.026669		At5g14790.1	At5g14790.1	expressed protein [At5g14790.1]
A_84_P22571	TREATMENT	90 min col-0 treatment	45 min col-0 control	1.1846	0.2857	15	-4.15	0.000862	0.026669		At5g52310.1	At5g52310.1	low-temperature-responsive protein 78 (LTI78) / desiccation-responsive protein 29A (RD29A) [At5g52310.1]
A_84_P19636	TREATMENT	90 min col-0 treatment	45 min col-0 control	0.3625	0.08745	15	-4.15	0.000863	0.0266729		At5g13410.1	At5g13410.1	immunophilin / FKBP-type peptidyl-prolyl cis-trans isomerase family protein SP:Q9LYR5; similar to FK506-binding protein (Peptidyl-prolyl cis-trans isomerase) (PPiase) (Rotamase) (SP:P25138) [{Neisseria meningitidis]; peptidyl-prolyl cis-trans...
A_84_P19020	TREATMENT	90 min col-0 treatment	45 min col-0 control	0.1911	0.04612	15	-4.14	0.000866	0.0267385		At1g69220.1	At1g69220.1	serine/threonine protein kinase, putative identical to serine/threonine kinase [Arabidopsis thaliana] gi|2352084|gb|AAB68776 [At1g69220.1]
A_84_P93929	TREATMENT	90 min col-0 treatment	45 min col-0 control	0.3849	0.09297	15	-4.14	0.000871	0.0268658		At4g39040.1	At4g39040.1	expressed protein contains PF01985: Uncharacterised protein family [At4g39040.1]
A_84_P15455	TREATMENT	90 min col-0 treatment	45 min col-0 control	-0.1877	0.04533	15	4.14	0.000874	0.0269311		At2g02860.1	At2g02860.1	sucrose transporter / sucrose-proton symporter (SUC3) identical to sucrose transporter [Arabidopsis thaliana] GI:8052190; similar to sucrose transporters from [Oryza sativa (japonica cultivar-group)] GI:2723471, [Zea mays] GI:5771354, [Triticum...
A_84_P15394	TREATMENT	90 min col-0 treatment	45 min col-0 control	-0.3936	0.09511	15	4.14	0.000876	0.0269492		At2g34830.1	At2g34830.1	WRKY family transcription factor [At2g34830.1]
A_84_P104706	TREATMENT	90 min col-0 treatment	45 min col-0 control	-0.206	0.04979	15	4.14	0.000878	0.0269492		At5g14600.1	At5g14600.1	expressed protein [At5g14600.1]
A_84_P164223	TREATMENT	90 min col-0 treatment	45 min col-0 control	0.2615	0.06323	15	-4.14	0.000879	0.0269492		At2g42870.1	At2g42870.1	expressed protein [At2g42870.1]
A_84_P17394	TREATMENT	90 min col-0 treatment	45 min col-0 control	0.3106	0.07509	15	-4.14	0.000879	0.0269492		At3g14240.1	At3g14240.1	subtilase family protein contains similarity to SBT1 GI:1771160 from [Lycopersicon esculentum] [At3g14240.1]
A_84_P18117	TREATMENT	90 min col-0 treatment	45 min col-0 control	0.344	0.08318	15	-4.14	0.000879	0.0269492		At1g75800.1	At1g75800.1	pathogenesis-related thaumatin family protein similar to receptor serine/threonine kinase PR5K [Arabidopsis thaliana] GI:1235680; contains Pfam profile: PF00314 Thaumatin family [At1g75800.1]
A_84_P716829	TREATMENT	90 min col-0 treatment	45 min col-0 control	-1.6115	0.3902	15	4.13	0.00089	0.0270152		CHR1:021477409-021477350	CHR1:021477409-021477350	Unknown
A_84_P225239	TREATMENT	90 min col-0 treatment	45 min col-0 control	-0.5025	0.1217	15	4.13	0.00089	0.0270152		At3g13960.1	At3g13960.1	expressed protein identical to transcription activator GRL5 [Arabidopsis thaliana] GI:21539888 (unpublished); supporting cDNA gi|21539887|gb|AY102638.1| [At3g13960.1]
A_84_P20802	TREATMENT	90 min col-0 treatment	45 min col-0 control	-0.4604	0.1114	15	4.13	0.000887	0.0270152		At1g27200.1	At1g27200.1	expressed protein contains Pfam PF01697: Domain of unknown function [At1g27200.1]
A_84_P174931	TREATMENT	90 min col-0 treatment	45 min col-0 control	-0.2817	0.06817	15	4.13	0.000885	0.0270152		At5g22940.1	At5g22940.1	exostosin family protein contains Pfam profile: PF03016 exostosin family [At5g22940.1]
A_84_P503267	TREATMENT	90 min col-0 treatment	45 min col-0 control	0.222	0.05372	15	-4.13	0.000888	0.0270152		At4g14605.1	At4g14605.1	mitochondrial transcription termination factor-related / mTERF-related contains Pfam profile PF02536: mTERF [At4g14605.1]
A_84_P13696	TREATMENT	90 min col-0 treatment	45 min col-0 control	0.2565	0.06209	15	-4.13	0.000889	0.0270152		At3g47610.1	At3g47610.1	expressed protein [At3g47610.1]
A_84_P96506	TREATMENT	90 min col-0 treatment	45 min col-0 control	0.3189	0.07719	15	-4.13	0.000887	0.0270152		At4g14870.1	At4g14870.1	expressed protein [At4g14870.1]
A_84_P12829	TREATMENT	90 min col-0 treatment	45 min col-0 control	0.3373	0.08164	15	-4.13	0.000887	0.0270152		At4g02050.1	At4g02050.1	sugar transporter, putative similar to SP|Q10710 Sugar carrier protein A {Ricinus communis}, glucose transporter [Saccharum hybrid cultivar H65-7052] GI:347855; contains Pfam profile PF00083: major facilitator superfamily protein [At4g02050.1]
A_84_P12702	TREATMENT	90 min col-0 treatment	45 min col-0 control	0.3775	0.09134	15	-4.13	0.000885	0.0270152		At3g16440.1	At3g16440.1	jacalin lectin family protein contains Pfam profile: PF01419 jacalin-like lectin domain; similar to myrosinase-binding protein homolog [Arabidopsis thaliana] GI:2997767 [At3g16440.1]
A_84_P731349	TREATMENT	90 min col-0 treatment	45 min col-0 control	0.6601	0.1598	15	-4.13	0.000887	0.0270152		TC252363	TC252363	Unknown
A_84_P541588	TREATMENT	90 min col-0 treatment	45 min col-0 control	0.2295	0.05557	15	-4.13	0.000891	0.0270187		At5g42950.1	At5g42950.1	GYF domain-containing protein contains Pfam profile: PF02213 GYF domain [At5g42950.1]
A_84_P15640	TREATMENT	90 min col-0 treatment	45 min col-0 control	1.2327	0.2988	15	-4.13	0.000898	0.027204		At3g60290.1	At3g60290.1	oxidoreductase, 2OG-Fe(II) oxygenase family protein similar to flavonol synthase 1 [SP|Q96330], gibberellin 20-oxidase [GI:9791186]; contains PF03171 2OG-Fe(II) oxygenase superfamily domain [At3g60290.1]
A_84_P14825	TREATMENT	90 min col-0 treatment	45 min col-0 control	0.2433	0.05898	15	-4.13	0.000899	0.0272073		At4g34270.1	At4g34270.1	TIP41-like family protein contains Pfam PF04176: TIP41-like family; identical to cDNA putative cytoskeletal protein mRNA, partial cds GI:5031529 [At4g34270.1]
A_84_P11100	TREATMENT	90 min col-0 treatment	45 min col-0 control	-0.1424	0.03452	15	4.12	0.0009	0.0272106		At5g05470.1	At5g05470.1	eukaryotic translation initiation factor 2 subunit 1, putative / eIF-2A, putative / eIF-2-alpha, putative similar to SWISS-PROT:P20459 eukaryotic translation initiation factor 2 alpha subunit (eIF-2- alpha) [Saccharomyces cerevisiae]; identical to...
A_84_P146119	TREATMENT	90 min col-0 treatment	45 min col-0 control	0.3007	0.07295	15	-4.12	0.000905	0.0273347		At1g78930.1	At1g78930.1	mitochondrial transcription termination factor-related / mTERF-related contains Pfam profile PF02536: mTERF [At1g78930.1]
A_84_P575781	TREATMENT	90 min col-0 treatment	45 min col-0 control	1.5804	0.3835	15	-4.12	0.000906	0.0273378		At2g46770.1	At2g46770.1	no apical meristem (NAM) family protein contains Pfam PF02365: No apical meristem (NAM) domain; [At2g46770.1]
A_84_P16845	TREATMENT	90 min col-0 treatment	45 min col-0 control	0.2199	0.05339	15	-4.12	0.000909	0.0273742		At5g38640.1	At5g38640.1	eukaryotic translation initiation factor 2B family protein / eIF-2B family protein similar to SP|P41111 Translation initiation factor eIF-2B delta subunit (eIF-2B GDP-GTP exchange factor) {Oryctolagus cuniculus}; contains Pfam profile PF01008:...
A_84_P19434	TREATMENT	90 min col-0 treatment	45 min col-0 control	0.4397	0.1067	15	-4.12	0.000909	0.0273742		At3g62860.1	At3g62860.1	esterase/lipase/thioesterase family protein similar to monoglyceride lipase from [Homo sapiens] GI:14594904, [Mus musculus] GI:2632162; contains Interpro entry IPR000379 [At3g62860.1]
A_84_P12088	TREATMENT	90 min col-0 treatment	45 min col-0 control	-0.5738	0.1394	15	4.12	0.000913	0.0274676		At5g22630.1	At5g22630.1	prephenate dehydratase family protein contains Pfam profile PF00800: prephenate dehydratase [At5g22630.1]
A_84_P10706	TREATMENT	90 min col-0 treatment	45 min col-0 control	-0.7958	0.1934	15	4.11	0.00092	0.027651		At2g41090.1	At2g41090.1	calmodulin-like calcium-binding protein, 22 kDa (CaBP-22) identical to SP|P30187 22 kDa calmodulin-like calcium-binding protein (CABP-22) [Arabidopsis thaliana] [At2g41090.1]
A_84_P88439	TREATMENT	90 min col-0 treatment	45 min col-0 control	0.2834	0.0689	15	-4.11	0.000921	0.0276538		At1g45976.1	At1g45976.1	expressed protein [At1g45976.1]
A_84_P529352	TREATMENT	90 min col-0 treatment	45 min col-0 control	0.2496	0.06071	15	-4.11	0.000925	0.0277194		At1g17410.1	At1g17410.1	nucleoside diphosphate kinase family protein contains Pfam PF00334 : Nucleoside diphosphate kinase domain; similar to Nucleoside diphosphate kinase homolog 5 (NDK-H 5) (NDP kinase homolog 5) (nm23-H5) (Testis-specific nm23 homolog) (Inhibitor of...
A_84_P222236	TREATMENT	90 min col-0 treatment	45 min col-0 control	0.2682	0.06524	15	-4.11	0.000925	0.0277194		At2g42300.1	At2g42300.1	basic helix-loop-helix (bHLH) family protein contains Pfam profile: PF00010 helix-loop-helix DNA-binding domain [At2g42300.1]
A_84_P14174	TREATMENT	90 min col-0 treatment	45 min col-0 control	-0.4868	0.1185	15	4.11	0.000928	0.027782		At1g15820.1	At1g15820.1	chlorophyll A-B binding protein, chloroplast (LHCB6) nearly identical to Lhcb6 protein [Arabidopsis thaliana] GI:4741960; contains Pfam profile PF00504: Chlorophyll A-B binding protein [At1g15820.1]
A_84_P23532	TREATMENT	90 min col-0 treatment	45 min col-0 control	0.2904	0.0707	15	-4.11	0.000932	0.0278745		At5g56780.1	At5g56780.1	expressed protein contains similarity to transcription repressor [At5g56780.1]
A_84_P268160	TREATMENT	90 min col-0 treatment	45 min col-0 control	-0.4224	0.1029	15	4.11	0.000934	0.0278797		At3g13950.1	At3g13950.1	expressed protein [At3g13950.1]
A_84_P16108	TREATMENT	90 min col-0 treatment	45 min col-0 control	0.4031	0.09818	15	-4.11	0.000934	0.0278797		At1g09940.1	At1g09940.1	glutamyl-tRNA reductase 2 / GluTR (HEMA2) identical to glutamyl-tRNA reductase 2, chloroplast [SP|P49294] [At1g09940.1]
A_84_P286020	TREATMENT	90 min col-0 treatment	45 min col-0 control	0.3671	0.08941	15	-4.11	0.000935	0.0278823		At2g39140.1	At2g39140.1	pseudouridine synthase family protein [At2g39140.1]
A_84_P537337	TREATMENT	90 min col-0 treatment	45 min col-0 control	-0.166	0.04044	15	4.1	0.000938	0.0279444		At1g15140.2	At1g15140.2	oxidoreductase NAD-binding domain-containing protein Contains Pfam profile PF00175: Oxidoreductase NAD-binding domain; ESTs gb|H76345 and gb|AA651465 come from this gene [At1g15140.2]
A_84_P298234	TREATMENT	90 min col-0 treatment	45 min col-0 control	0.4773	0.1163	15	-4.1	0.000941	0.0280065		At4g35070.1	At4g35070.1	expressed protein [At4g35070.1]
A_84_P18996	TREATMENT	90 min col-0 treatment	45 min col-0 control	-0.3148	0.07676	15	4.1	0.000944	0.0280684		At1g21750.1	At1g21750.1	protein disulfide isomerase, putative similar to SP|P29828 Protein disulfide isomerase precursor (PDI) (EC 5.3.4.1) {Medicago sativa}; isoform contains non-consensus GA donor splice site at intron 9 [At1g21750.1]
A_84_P579880	TREATMENT	90 min col-0 treatment	45 min col-0 control	-0.2792	0.06813	15	4.1	0.00095	0.0282193		At2g40260.1	At2g40260.1	myb family transcription factor contains Pfam profile: PF00249 myb-like DNA-binding domain [At2g40260.1]
A_84_P508368	TREATMENT	90 min col-0 treatment	45 min col-0 control	0.4082	0.0997	15	-4.09	0.000958	0.0284293		At2g48050.1	At2g48050.1	expressed protein ; expression supported by MPSS [At2g48050.1]
A_84_P22225	TREATMENT	90 min col-0 treatment	45 min col-0 control	-0.2616	0.0639	15	4.09	0.000959	0.0284314		At3g51740.1	At3g51740.1	leucine-rich repeat transmembrane protein kinase, putative brassinosteroid-insensitive protein BRI1 - Arabidopsis thaliana, PIR:T09356 [At3g51740.1]
A_84_P10878	TREATMENT	90 min col-0 treatment	45 min col-0 control	-0.3398	0.08303	15	4.09	0.000962	0.0284926		At3g51930.1	At3g51930.1	transducin family protein / WD-40 repeat family protein contains 7 WD-40 repeats (PF00400); myosin heavy chain kinase B (SP:P90648)(GI:1903458) [Dictyostelium discoideum] [At3g51930.1]
A_84_P738863	TREATMENT	90 min col-0 treatment	45 min col-0 control	-0.9686	0.2368	15	4.09	0.000964	0.0285242		CHR1:011617035-011617094	CHR1:011617035-011617094	Unknown
A_84_P23382	TREATMENT	90 min col-0 treatment	45 min col-0 control	0.2603	0.06364	15	-4.09	0.000965	0.0285262		At5g01920.1	At5g01920.1	protein kinase family protein contains eukaryotic protein kinase domain, INTERPRO:IPR000719 [At5g01920.1]
A_84_P22573	TREATMENT	90 min col-0 treatment	45 min col-0 control	-0.208	0.05088	15	4.09	0.00097	0.0286462		At5g53130.1	At5g53130.1	cyclic nucleotide-regulated ion channel / cyclic nucleotide-gated channel (CNGC1) almost identical to cyclic nucleotide-regulated ion channel 1 pir:T51354, GI:11357236 from [Arabidopsis thaliana] [At5g53130.1]
A_84_P13523	TREATMENT	90 min col-0 treatment	45 min col-0 control	-0.2483	0.06075	15	4.09	0.000971	0.0286481		At2g21790.1	At2g21790.1	ribonucleoside-diphosphate reductase small chain, putative / ribonucleotide reductase, putative similar to ribonucleotide reductase GI:4151068 from [Nicotiana tabacum] [At2g21790.1]
A_84_P20987	TREATMENT	90 min col-0 treatment	45 min col-0 control	-0.2405	0.05885	15	4.09	0.000972	0.0286499		At1g05480.1	At1g05480.1	SNF2 domain-containing protein / helicase domain-containing protein low similarity to SP|Q9U7E0 Transcriptional regulator ATRX homolog {Caenorhabditis elegans}; contains PFam profiles PF00271: Helicase conserved C-terminal domain, PF00176: SNF2 family...
A_84_P15594	TREATMENT	90 min col-0 treatment	45 min col-0 control	3.3802	0.8272	15	-4.09	0.000973	0.0286517		At3g49700.1	At3g49700.1	1-aminocyclopropane-1-carboxylate synthase, putative / ACC synthase, putative similar to ACC synthases from Arabidopsis thaliana [GI:940370], Lycopersicon esculentum [GI:508609], Cucumis sativus [GI:3641649] [At3g49700.1]
A_84_P281300	TREATMENT	90 min col-0 treatment	45 min col-0 control	0.3313	0.08111	15	-4.08	0.000976	0.0287124		At3g46640.1	At3g46640.1	myb family transcription factor contains Pfam profile: PF00249 myb-like DNA-binding domain [At3g46640.1]
A_84_P178544	TREATMENT	90 min col-0 treatment	45 min col-0 control	0.4095	0.1003	15	-4.08	0.000981	0.0288317		At1g56220.1	At1g56220.1	dormancy/auxin associated family protein similar to Auxin-repressed 12.5 kDa protein (Swiss-Prot:Q05349) [Fragaria ananassa]; similar to auxin-repressed protein (GI:927034) [Fragaria x ananassa]; similar to dormancy-associated protein (GI:2605887)...
A_84_P11128	TREATMENT	90 min col-0 treatment	45 min col-0 control	-0.5558	0.1363	15	4.08	0.000987	0.0289523		At5g13870.1	At5g13870.1	xyloglucan:xyloglucosyl transferase / xyloglucan endotransglycosylase / endo-xyloglucan transferase (EXGT-A4) identical to endoxyloglucan transferase EXGT-A4 GI:5533315 from [Arabidopsis thaliana] [At5g13870.1]
A_84_P192864	TREATMENT	90 min col-0 treatment	45 min col-0 control	-0.22	0.05392	15	4.08	0.000987	0.0289523		At5g24760.1	At5g24760.1	alcohol dehydrogenase, putative similar to alcohol dehydrogenase from Solanum tuberosum [SP|p14673]; contains Pfam zinc-binding dehydrogenase domain PF00107 [At5g24760.1]
A_84_P93769	TREATMENT	90 min col-0 treatment	45 min col-0 control	-0.493	0.1209	15	4.08	0.00099	0.0290124		At2g02630.1	At2g02630.1	DC1 domain-containing protein contains Pfam profile PF03107: DC1 domain [At2g02630.1]
A_84_P13339	TREATMENT	90 min col-0 treatment	45 min col-0 control	0.27	0.06625	15	-4.08	0.000994	0.0291017		At1g79630.1	At1g79630.1	protein phosphatase 2C family protein / PP2C family protein contains Pfam PF00481 : Protein phosphatase 2C domain; similar to protein phosphatase-2C GI:3643088 from [Mesembryanthemum crystallinum] [At1g79630.1]
A_84_P279850	TREATMENT	90 min col-0 treatment	45 min col-0 control	0.5031	0.1235	15	-4.08	0.000995	0.0291031		At5g60630.1	At5g60630.1	expressed protein predicted protein, Arabidopsis thaliana [At5g60630.1]
A_84_P562803	TREATMENT	90 min col-0 treatment	45 min col-0 control	-0.3409	0.08367	15	4.07	0.000997	0.0291058		At5g20885.1	At5g20885.1	zinc finger (C3HC4-type RING finger) family protein contains Pfam profile: PF00097 zinc finger, C3HC4 type (RING finger) [At5g20885.1]
A_84_P136505	TREATMENT	90 min col-0 treatment	45 min col-0 control	0.5559	0.1365	15	-4.07	0.000997	0.0291058		At5g45040.1	At5g45040.1	cytochrome c6 (ATC6) identical to c6 type cytochrome [Arabidopsis thaliana] gi|19571824|emb|CAD27418 [At5g45040.1]
A_84_P722718	TREATMENT	90 min col-0 treatment	45 min col-0 control	-0.2709	0.06653	15	4.07	0.001	0.0291655		CHR1:006938938-006938997	CHR1:006938938-006938997	Unknown
A_84_P17161	TREATMENT	90 min col-0 treatment	45 min col-0 control	-0.5988	0.1472	15	4.07	0.00101	0.0293451		At1g52750.1	At1g52750.1	hydrolase, alpha/beta fold family protein contains Pfam profile PF00561: hydrolase, alpha/beta fold family [At1g52750.1]
A_84_P140199	TREATMENT	90 min col-0 treatment	45 min col-0 control	0.1972	0.04847	15	-4.07	0.00101	0.0293451		At2g40950.1	At2g40950.1	bZIP transcription factor family protein similar to AtbZIP transcription factor GI:17065880 from [Arabidopsis thaliana]; contains Pfam profile: bZIP transcription factor PF00170 [At2g40950.1]
A_84_P19738	TREATMENT	90 min col-0 treatment	45 min col-0 control	0.2545	0.06259	15	-4.07	0.00101	0.0293451		At5g53890.1	At5g53890.1	leucine-rich repeat transmembrane protein kinase, putative [At5g53890.1]
A_84_P22669	TREATMENT	90 min col-0 treatment	45 min col-0 control	0.3024	0.0743	15	-4.07	0.00101	0.0293451		At2g17975.1	At2g17975.1	zinc finger (Ran-binding) family protein contains Pfam domain, PF00641: Zn-finger in Ran binding protein and others [At2g17975.1]
A_84_P14037	TREATMENT	90 min col-0 treatment	45 min col-0 control	-0.5125	0.1262	15	4.06	0.00102	0.0295513		At5g46470.1	At5g46470.1	disease resistance protein (TIR-NBS-LRR class), putative domain signature TIR-NBS-LRR exists, suggestive of a disease resistance protein. [At5g46470.1]
A_84_P248185	TREATMENT	90 min col-0 treatment	45 min col-0 control	0.3064	0.07543	15	-4.06	0.00102	0.0295513		At1g51100.1	At1g51100.1	expressed protein [At1g51100.1]
A_84_P22129	TREATMENT	90 min col-0 treatment	45 min col-0 control	0.8679	0.2137	15	-4.06	0.00102	0.0295513		At3g27660.1	At3g27660.1	glycine-rich protein / oleosin identical to oleosin isoform GB:S71286 from [Arabidopsis thaliana]; identical to cDNA oleosin (isoform Atol2) GI:987013 [At3g27660.1]
A_84_P15429	TREATMENT	90 min col-0 treatment	45 min col-0 control	-0.4708	0.1159	15	4.06	0.00103	0.0297845		At2g19620.1	At2g19620.1	Ndr family protein similar to SP|O23969 Pollen specific protein SF21 {Helianthus annuus}; contains Pfam profile PF03096: Ndr family [At2g19620.1]
A_84_P312143	TREATMENT	90 min col-0 treatment	45 min col-0 control	0.18	0.04436	15	-4.06	0.00103	0.0297845		At1g51740.1	At1g51740.1	syntaxin 81 (SYP81) identical to SP|P59277 Syntaxin 81 (AtSYP81) {Arabidopsis thaliana}; identified as syntaxin SYP81 by Sanderfoot, A.A., et al in Plant Physiol. 124:1558-69 (2000); similar to Syntaxin 18 (SP:Q9P2W9){Homo sapiens} [At1g51740.1]
A_84_P61410	TREATMENT	90 min col-0 treatment	45 min col-0 control	-0.4104	0.1012	15	4.05	0.00104	0.0299037		At1g13970.1	At1g13970.1	expressed protein [At1g13970.1]
A_84_P21601	TREATMENT	90 min col-0 treatment	45 min col-0 control	-0.3843	0.09478	15	4.05	0.00104	0.0299037		At5g45840.1	At5g45840.1	leucine-rich repeat transmembrane protein kinase, putative and genscan+ [At5g45840.1]
A_84_P65844	TREATMENT	90 min col-0 treatment	45 min col-0 control	-0.2038	0.05026	15	4.05	0.00104	0.0299037		At2g03800.1	At2g03800.1	expressed protein [At2g03800.1]
A_84_P288914	TREATMENT	90 min col-0 treatment	45 min col-0 control	0.1952	0.04816	15	-4.05	0.00104	0.0299037		At2g35500.1	At2g35500.1	shikimate kinase-related low similarity to shikimate kinase precursor from Lycopersicon esculentum [SP|Q00497] [At2g35500.1]
A_84_P591383	TREATMENT	90 min col-0 treatment	45 min col-0 control	0.263	0.06491	15	-4.05	0.00104	0.0299037		At5g45660.1	At5g45660.1	expressed protein [At5g45660.1]
A_84_P15793	TREATMENT	90 min col-0 treatment	45 min col-0 control	0.7252	0.179	15	-4.05	0.00104	0.0299037		At4g40070.1	At4g40070.1	expressed protein [At4g40070.1]
A_84_P94069	TREATMENT	90 min col-0 treatment	45 min col-0 control	0.3205	0.07916	15	-4.05	0.00105	0.0301062		At5g53160.1	At5g53160.1	expressed protein similar to unknown protein (pir||T02893) [At5g53160.1]
A_84_P102806	TREATMENT	90 min col-0 treatment	45 min col-0 control	0.3528	0.08716	15	-4.05	0.00105	0.0301062		At4g23530.1	At4g23530.1	expressed protein [At4g23530.1]
A_84_P200954	TREATMENT	90 min col-0 treatment	45 min col-0 control	0.6131	0.1514	15	-4.05	0.00105	0.0301062		CHR3:015821550-015821609	CHR3:015821550-015821609	Unknown
A_84_P547579	TREATMENT	90 min col-0 treatment	45 min col-0 control	-1.1335	0.2802	15	4.05	0.00106	0.0303075		At4g05030.1	At4g05030.1	heavy-metal-associated domain-containing protein contains Pfam profile PF00403: Heavy-metal-associated domain [At4g05030.1]
A_84_P70484	TREATMENT	90 min col-0 treatment	45 min col-0 control	-0.3506	0.08669	15	4.04	0.00106	0.0303075		At2g32230.1	At2g32230.1	pentatricopeptide (PPR) repeat-containing protein contains Pfam profile PF01535: PPR repeat [At2g32230.1]
A_84_P16799	TREATMENT	90 min col-0 treatment	45 min col-0 control	0.487	0.1204	15	-4.05	0.00106	0.0303075		At1g18300.1	At1g18300.1	MutT/nudix family protein similar to SP|Q09790 Diadenosine 5',5'''-P1,P6-hexaphosphate hydrolase (EC 3.6.1.-) (Ap6A hydrolase) {Schizosaccharomyces pombe}; contains Pfam profile PF00293: NUDIX domain [At1g18300.1]
A_84_P16516	TREATMENT	90 min col-0 treatment	45 min col-0 control	-0.2078	0.05143	15	4.04	0.00107	0.0305363		At3g43810.1	At3g43810.1	calmodulin-7 (CAM7) almost identical to calmodulin GI:16227 from [Arabidopsis thaliana], SP|P59220 Calmodulin-7 {Arabidopsis thaliana} [At3g43810.1]
A_84_P125091	TREATMENT	90 min col-0 treatment	45 min col-0 control	0.3549	0.08787	15	-4.04	0.00107	0.0305363		At3g04860.1	At3g04860.1	expressed protein [At3g04860.1]
A_84_P532232	TREATMENT	90 min col-0 treatment	45 min col-0 control	-0.4483	0.1112	15	4.03	0.00108	0.0307069		At2g23100.1	At2g23100.1	DC1 domain-containing protein contains Pfam profile PF03107: DC1 domain [At2g23100.1]
A_84_P552529	TREATMENT	90 min col-0 treatment	45 min col-0 control	-0.2922	0.07241	15	4.03	0.00108	0.0307069		At1g73020.1	At1g73020.1	expressed protein contains Pfam profile PF04547: Protein of unknown function, DUF590; expression supported by MPSS [At1g73020.1]
A_84_P106642	TREATMENT	90 min col-0 treatment	45 min col-0 control	-0.2399	0.05942	15	4.04	0.00108	0.0307069		At2g34050.1	At2g34050.1	expressed protein contains Pfam PS00030: Eukaryotic putative RNA-binding region RNP-1 signature [At2g34050.1]
A_84_P244395	TREATMENT	90 min col-0 treatment	45 min col-0 control	0.377	0.0934	15	-4.04	0.00108	0.0307069		At5g16380.1	At5g16380.1	expressed protein contains Pfam profile PF04398: Protein of unknown function, DUF538 [At5g16380.1]
A_84_P707180	TREATMENT	90 min col-0 treatment	45 min col-0 control	-0.5656	0.1403	15	4.03	0.00109	0.0309049		TC259409	TC259409	Q9LFB5 (Q9LFB5) Anthranilate N-benzoyltransferase-like protein (AT5g01210/F7J8_190), partial (87%) [TC259409]
A_84_P13277	TREATMENT	90 min col-0 treatment	45 min col-0 control	-0.1818	0.04513	15	4.03	0.00109	0.0309049		At1g05210.1	At1g05210.1	expressed protein [At1g05210.1]
A_84_P15618	TREATMENT	90 min col-0 treatment	45 min col-0 control	0.2511	0.06232	15	-4.03	0.00109	0.0309049		At3g55030.1	At3g55030.1	phosphatidylglycerolphosphate synthase, putative similar to phosphatidylglycerolphosphate synthase GI:13365519 from [Arabidopsis thaliana]; contains non-consensus CG acceptor splice site at exon 4 [At3g55030.1]
A_84_P13120	TREATMENT	90 min col-0 treatment	45 min col-0 control	-1.0917	0.2712	15	4.03	0.0011	0.0310443		At5g54230.1	At5g54230.1	myb family transcription factor (MYB49) contains Pfam profile: PF00249 myb-like DNA-binding domain [At5g54230.1]
A_84_P180164	TREATMENT	90 min col-0 treatment	45 min col-0 control	0.2295	0.05702	15	-4.03	0.0011	0.0310443		At5g47830.1	At5g47830.1	expressed protein [At5g47830.1]
A_84_P157615	TREATMENT	90 min col-0 treatment	45 min col-0 control	0.2496	0.06199	15	-4.03	0.0011	0.0310443		At2g47090.1	At2g47090.1	zinc finger (C2H2 type) family protein contains Prosite PS00028: Zinc finger, C2H2 type, domain [At2g47090.1]
A_84_P187334	TREATMENT	90 min col-0 treatment	45 min col-0 control	0.4314	0.1072	15	-4.02	0.0011	0.0310443		At5g12440.1	At5g12440.1	zinc finger (CCCH-type) family protein contains Pfam domain, PF00642: Zinc finger C-x8-C-x5-C-x3-H type (and similar) [At5g12440.1]
A_84_P65864	TREATMENT	90 min col-0 treatment	45 min col-0 control	0.5081	0.1263	15	-4.02	0.0011	0.0310443		At1g18740.1	At1g18740.1	expressed protein [At1g18740.1]
A_84_P572946	TREATMENT	90 min col-0 treatment	45 min col-0 control	-0.2818	0.07004	15	4.02	0.00111	0.0312399		At1g67040.1	At1g67040.1	expressed protein ; expression supported by MPSS [At1g67040.1]
A_84_P200614	TREATMENT	90 min col-0 treatment	45 min col-0 control	0.2286	0.05682	15	-4.02	0.00111	0.0312399		At3g28460.1	At3g28460.1	expressed protein contains Pfam PF03602: Conserved hypothetical protein 95 [At3g28460.1]
A_84_P603436	TREATMENT	90 min col-0 treatment	45 min col-0 control	0.3939	0.0979	15	-4.02	0.00111	0.0312399		At3g05410.1	At3g05410.1	expressed protein [At3g05410.1]
A_84_P268090	TREATMENT	90 min col-0 treatment	45 min col-0 control	-0.6746	0.1679	15	4.02	0.00112	0.031348		At2g01300.1	At2g01300.1	expressed protein [At2g01300.1]
A_84_P23661	TREATMENT	90 min col-0 treatment	45 min col-0 control	-0.3694	0.09195	15	4.02	0.00112	0.031348		At1g61100.1	At1g61100.1	disease resistance protein (TIR class), putative domain signature TIR exists, suggestive of a disease resistance protein. [At1g61100.1]
A_84_P165853	TREATMENT	90 min col-0 treatment	45 min col-0 control	-0.3142	0.07821	15	4.02	0.00112	0.031348		At5g05180.1	At5g05180.1	expressed protein [At5g05180.1]
A_84_P21290	TREATMENT	90 min col-0 treatment	45 min col-0 control	-0.3065	0.07628	15	4.02	0.00112	0.031348		At3g54120.1	At3g54120.1	reticulon family protein (RTNLB12) contains Pfam profile PF02453: Reticulon [At3g54120.1]
A_84_P154495	TREATMENT	90 min col-0 treatment	45 min col-0 control	0.2956	0.07355	15	-4.02	0.00112	0.031348		At2g38330.1	At2g38330.1	MATE efflux family protein low similarity to enhanced disease susceptibility 5 [Arabidopsis thaliana] GI:16589070; contains Pfam profile PF01554: Uncharacterized membrane protein family [At2g38330.1]
A_84_P20820	TREATMENT	90 min col-0 treatment	45 min col-0 control	0.4449	0.1108	15	-4.02	0.00112	0.031348		At1g77060.1	At1g77060.1	mutase family protein similar to carboxyvinyl-carboxyphosphonate phosphorylmutase GB:O49290 from [Arabidopsis thaliana]; similar to carboxyphosphonoenolpyruvate mutase (GI:47149) [Streptomyces hygroscopicus]; contains Prosite PS00161: Isocitrate lyase...
A_84_P17621	TREATMENT	90 min col-0 treatment	45 min col-0 control	0.3226	0.08043	15	-4.01	0.00113	0.0315989		At4g24810.1	At4g24810.1	ABC1 family protein contains Pfam domain, PF03109: ABC1 family [At4g24810.1]
A_84_P211128	TREATMENT	90 min col-0 treatment	45 min col-0 control	-0.5154	0.1287	15	4.01	0.00115	0.0319825		At1g80240.1	At1g80240.1	expressed protein contains Pfam profile PF04862: Protein of unknown function, DUF642 [At1g80240.1]
A_84_P226709	TREATMENT	90 min col-0 treatment	45 min col-0 control	-0.3904	0.09755	15	4	0.00115	0.0319825		At5g47420.1	At5g47420.1	expressed protein contains Pfam domain, PF01987: Protein of unknown function [At5g47420.1]
A_84_P134385	TREATMENT	90 min col-0 treatment	45 min col-0 control	-0.3681	0.09194	15	4	0.00115	0.0319825		At2g01910.1	At2g01910.1	microtubule associated protein (MAP65/ASE1) family protein low similarity to protein regulating cytokinesis 1 (PRC1) [Homo sapiens] GI:2865521; contains Pfam profile PF03999: Microtubule associated protein (MAP65/ASE1 family) [At2g01910.1]
A_84_P516250	TREATMENT	90 min col-0 treatment	45 min col-0 control	-0.241	0.06021	15	4	0.00115	0.0319825		At2g06025.1	At2g06025.1	GCN5-related N-acetyltransferase (GNAT) family protein low similarity to streptothricin acetyltransferase homolog [Campylobacter jejuni] GI:6650363; contains Pfam profile PF00583: acetyltransferase, GNAT family [At2g06025.1]
A_84_P88369	TREATMENT	90 min col-0 treatment	45 min col-0 control	0.2381	0.05943	15	-4.01	0.00115	0.0319825		At2g46900.1	At2g46900.1	expressed protein contains Pfam profile PF04910: Protein of unknown function, DUF654 [At2g46900.1]
A_84_P17175	TREATMENT	90 min col-0 treatment	45 min col-0 control	1.0045	0.2508	15	-4.01	0.00115	0.0319825		At1g32560.1	At1g32560.1	late embryogenesis abundant group 1 domain-containing protein / LEA group 1 domain-containing protein contains Pfam domain, PF03760: Late embryogenesis abundant (LEA) group 1 [At1g32560.1]
A_84_P302260	TREATMENT	90 min col-0 treatment	45 min col-0 control	-0.2307	0.05767	15	4	0.00116	0.0322019		At1g07130.1	At1g07130.1	OB-fold nucleic acid binding domain-containing protein contains InterPro entry IPR004365: OB-fold nucleic acid binding domain [At1g07130.1]
A_84_P508506	TREATMENT	90 min col-0 treatment	45 min col-0 control	0.2686	0.06716	15	-4	0.00116	0.0322019		At3g55820.1	At3g55820.1	hypothetical protein [At3g55820.1]
A_84_P22532	TREATMENT	90 min col-0 treatment	45 min col-0 control	-0.8806	0.2204	15	3.99	0.00117	0.0323618		At5g41740.1	At5g41740.1	disease resistance protein (TIR-NBS-LRR class), putative domain signature TIR-NBS-LRR exists, suggestive of a disease resistance protein. [At5g41740.1]
A_84_P119062	TREATMENT	90 min col-0 treatment	45 min col-0 control	-0.2685	0.06716	15	4	0.00117	0.0323618		At3g45930.1	At3g45930.1	histone H4 identical to histone H4 from Lycopersicon esculentum GI:297150, Lolium temulentum SP|P02308, Acropora formosa GI:455652, Citrus jambhiri GI:16797797 [At3g45930.1]
A_84_P15347	TREATMENT	90 min col-0 treatment	45 min col-0 control	0.3157	0.07901	15	-4	0.00117	0.0323618		At2g40540.1	At2g40540.1	potassium transporter, putative (KT2) identical to putative potassium transporter AtKT2p [Arabidopsis thaliana] gi|2384671|gb|AAC49845, strong similarity to potassium transporter HAK2p [Mesembryanthemum crystallinum] GI:14091471; KUP/HAK/KT...
A_84_P21063	TREATMENT	90 min col-0 treatment	45 min col-0 control	0.4365	0.1092	15	-4	0.00117	0.0323618		At2g25080.1	At2g25080.1	phospholipid hydroperoxide glutathione peroxidase, chloroplast / PHGPx (GPX1) identical to SP|P52032 Phospholipid hydroperoxide glutathione peroxidase, chloroplast precursor (EC 1.11.1.9) (PHGPx) {Arabidopsis thaliana}; contains Glutathione...
A_84_P12376	TREATMENT	90 min col-0 treatment	45 min col-0 control	-0.2329	0.05836	15	3.99	0.00118	0.0326089		At1g17160.1	At1g17160.1	pfkB-type carbohydrate kinase family protein contains Pfam profile: PF00294 pfkB family carbohydrate kinase [At1g17160.1]
A_84_P214688	TREATMENT	90 min col-0 treatment	45 min col-0 control	-1.2258	0.3074	15	3.99	0.00119	0.0327666		At4g11340.1	At4g11340.1	Toll-Interleukin-Resistance (TIR) domain-containing protein domain signature TIR exists, suggestive of a disease resistance protein. [At4g11340.1]
A_84_P13581	TREATMENT	90 min col-0 treatment	45 min col-0 control	-0.3003	0.07533	15	3.99	0.00119	0.0327666		At3g07370.1	At3g07370.1	tetratricopeptide repeat (TPR)-containing protein / U-box domain-containing protein similar to serologically defined colon cancer antigen 7 GB:5031963 GI:3170178 [Homo sapiens]; [At3g07370.1]
A_84_P293834	TREATMENT	90 min col-0 treatment	45 min col-0 control	0.2632	0.06599	15	-3.99	0.00119	0.0327666		At2g41750.1	At2g41750.1	DTW domain-containing protein contains Pfam domain, PF03942: DTW domain [At2g41750.1]
A_84_P710466	TREATMENT	90 min col-0 treatment	45 min col-0 control	0.5536	0.1388	15	-3.99	0.00119	0.0327666		BX817525	BX817525	Arabidopsis thaliana Full-length cDNA Complete sequence from clone GSLTSIL28ZH05 of Silique of strain col-0 of Arabidopsis thaliana (thale cress) [BX817525]
A_84_P23557	TREATMENT	90 min col-0 treatment	45 min col-0 control	-0.6951	0.1745	15	3.98	0.0012	0.0328642		At5g62430.1	At5g62430.1	Dof-type zinc finger domain-containing protein similar to H-protein promoter binding factor-2a GI:3386546 from [Arabidopsis thaliana] [At5g62430.1]
A_84_P68014	TREATMENT	90 min col-0 treatment	45 min col-0 control	-0.3389	0.08507	15	3.98	0.0012	0.0328642		At4g34150.1	At4g34150.1	C2 domain-containing protein similar to calcium-dependent protein kinase [Dunaliella tertiolecta] GI:6644464; contains Pfam profile PF00168: C2 domain [At4g34150.1]
A_84_P539400	TREATMENT	90 min col-0 treatment	45 min col-0 control	-0.2556	0.06416	15	3.98	0.0012	0.0328642		At2g40730.1	At2g40730.1	HEAT repeat-containing protein contains INTERPRO:IPR000357 HEAT repeat [At2g40730.1]
A_84_P18773	TREATMENT	90 min col-0 treatment	45 min col-0 control	0.425	0.1067	15	-3.98	0.0012	0.0328642		At5g48250.1	At5g48250.1	zinc finger (B-box type) family protein contains similarity to CONSTANS homologs [At5g48250.1]
A_84_P15366	TREATMENT	90 min col-0 treatment	45 min col-0 control	0.5405	0.1357	15	-3.98	0.0012	0.0328642		At1g11210.1	At1g11210.1	expressed protein contains similarity to cotton fiber expressed protein 1 [Gossypium hirsutum] gi|3264828|gb|AAC33276 [At1g11210.1]
A_84_P17200	TREATMENT	90 min col-0 treatment	45 min col-0 control	0.5747	0.1443	15	-3.98	0.0012	0.0328642		At1g16110.1	At1g16110.1	wall-associated kinase, putative contains similarity to wall-associated kinase 2 GI:4826399 from [Arabidopsis thaliana] [At1g16110.1]
A_84_P12629	TREATMENT	90 min col-0 treatment	45 min col-0 control	-0.537	0.1349	15	3.98	0.00121	0.0330787		At3g03550.1	At3g03550.1	zinc finger (C3HC4-type RING finger) family protein contains zinc finger domain, C3HC4 type (RING finger) 152633. [At3g03550.1]
A_84_P147888	TREATMENT	90 min col-0 treatment	45 min col-0 control	-0.3192	0.08022	15	3.98	0.00121	0.0330787		At4g23450.1	At4g23450.1	zinc finger (C3HC4-type RING finger) family protein contains Pfam profile: PF00097 zinc finger, C3HC4 type [At4g23450.1]
A_84_P11642	TREATMENT	90 min col-0 treatment	45 min col-0 control	-0.429	0.1079	15	3.98	0.00122	0.0332627		At2g24170.1	At2g24170.1	endomembrane protein 70, putative similar to MURA transposase of maize Mutator transposon [At2g24170.1]
A_84_P14869	TREATMENT	90 min col-0 treatment	45 min col-0 control	-0.3058	0.07691	15	3.98	0.00122	0.0332627		At5g02050.1	At5g02050.1	mitochondrial glycoprotein family protein / MAM33 family protein low similarity to SUAPRGA1 [Emericella nidulans] GI:6562379; contains Pfam profile PF02330: Mitochondrial glycoprotein [At5g02050.1]
A_84_P202838	TREATMENT	90 min col-0 treatment	45 min col-0 control	0.1798	0.04525	15	-3.97	0.00122	0.0332627		At3g54290.1	At3g54290.1	expressed protein contains Pfam PF03794: Domain of Unknown function [At3g54290.1]
A_84_P12973	TREATMENT	90 min col-0 treatment	45 min col-0 control	-0.3776	0.09505	15	3.97	0.00123	0.0333863		At4g36920.1	At4g36920.1	floral homeotic protein APETALA2 (AP2) Identical to (SP:P47927) Floral homeotic protein APETALA2. [Mouse-ear cress] {Arabidopsis thaliana} [At4g36920.1]
A_84_P548542	TREATMENT	90 min col-0 treatment	45 min col-0 control	0.3251	0.08187	15	-3.97	0.00123	0.0333863		At4g30090.1	At4g30090.1	expressed protein [At4g30090.1]
A_84_P167183	TREATMENT	90 min col-0 treatment	45 min col-0 control	0.4141	0.1043	15	-3.97	0.00123	0.0333863		At5g67570.1	At5g67570.1	pentatricopeptide (PPR) repeat-containing protein contains Pfam profile PF01535: PPR repeat [At5g67570.1]
A_84_P20656	TREATMENT	90 min col-0 treatment	45 min col-0 control	0.5321	0.134	15	-3.97	0.00123	0.0333863		At5g46050.1	At5g46050.1	proton-dependent oligopeptide transport (POT) family protein contains Pfam profile: PF00854 POT family [At5g46050.1]
A_84_P18266	TREATMENT	90 min col-0 treatment	45 min col-0 control	2.1568	0.5431	15	-3.97	0.00123	0.0333863		At2g19500.1	At2g19500.1	FAD-binding domain-containing protein / cytokinin oxidase family protein similar to cytokinin oxidase, Zea mays [SP|Q9T0N8] [gi:3441978] [At2g19500.1]
A_84_P591650	TREATMENT	90 min col-0 treatment	45 min col-0 control	-0.8989	0.2267	15	3.97	0.00124	0.0335088		At1g61563.1	At1g61563.1	rapid alkalinization factor (RALF) family protein contains Pfam domain PF05498: Rapid ALkalinization Factor (RALF) [At1g61563.1]
A_84_P20591	TREATMENT	90 min col-0 treatment	45 min col-0 control	-0.3054	0.07698	15	3.97	0.00124	0.0335088		At5g17820.1	At5g17820.1	peroxidase 57 (PER57) (P57) (PRXR10) identical to SP|Q43729 Peroxidase 57 precursor (EC 1.11.1.7) (Atperox P57) (PRXR10) (ATP13a) {Arabidopsis thaliana} [At5g17820.1]
A_84_P13108	TREATMENT	90 min col-0 treatment	45 min col-0 control	-0.262	0.06603	15	3.97	0.00124	0.0335088		At5g50740.1	At5g50740.1	copper chaperone (CCH)-related low similarity to copper homeostasis factor [GI:3168840][PMID: 9701579]; similar to farnesylated protein ATFP3 [GI:4097547]; contains Pfam profile PF00403: Heavy-metal-associated domain [At5g50740.1]
A_84_P511931	TREATMENT	90 min col-0 treatment	45 min col-0 control	0.2265	0.0571	15	-3.97	0.00124	0.0335088		At3g04590.1	At3g04590.1	DNA-binding family protein contains a AT hook motif (DNA binding motifs with a preference for A/T rich regions), Pfam:PF02178 [At3g04590.1]
A_84_P288754	TREATMENT	90 min col-0 treatment	45 min col-0 control	0.3929	0.09909	15	-3.97	0.00124	0.0335088		NP455183	NP455183	unknown protein [Arabidopsis thaliana] [NP455183]
A_84_P248115	TREATMENT	90 min col-0 treatment	45 min col-0 control	-0.7639	0.1928	15	3.96	0.00125	0.0336896		At5g58570.1	At5g58570.1	expressed protein [At5g58570.1]
A_84_P13244	TREATMENT	90 min col-0 treatment	45 min col-0 control	-0.6584	0.1661	15	3.96	0.00125	0.0336896		At1g51260.1	At1g51260.1	acyl-CoA:1-acylglycerol-3-phosphate acyltransferase, putative similar to acyl-CoA:1-acylglycerol-3-phosphate acyltransferase GI:4583544 from [Brassica napus] [At1g51260.1]
A_84_P525731	TREATMENT	90 min col-0 treatment	45 min col-0 control	0.2136	0.05392	15	-3.96	0.00125	0.0336896		At1g68730.1	At1g68730.1	zinc finger (DNL type) family protein contains Pfam profile PF05180: DNL zinc finger [At1g68730.1]
A_84_P10100	TREATMENT	90 min col-0 treatment	45 min col-0 control	-0.7625	0.1926	15	3.96	0.00126	0.0338397		At4g34400.1	At4g34400.1	transcriptional factor B3 family protein contains Pfam profile PF02362: B3 DNA binding domain [At4g34400.1]
A_84_P14382	TREATMENT	90 min col-0 treatment	45 min col-0 control	-0.5715	0.1443	15	3.96	0.00126	0.0338397		At2g41970.1	At2g41970.1	protein kinase, putative similar to Pto kinase interactor 1 (serine/threonine protein kinase) [Lycopersicon esculentum] gi|3668069|gb|AAC61805 [At2g41970.1]
A_84_P11293	TREATMENT	90 min col-0 treatment	45 min col-0 control	-0.2774	0.0701	15	3.96	0.00126	0.0338397		At5g17630.1	At5g17630.1	glucose-6-phosphate/phosphate translocator, putative similar to glucose-6-phosphate/phosphate-translocator precursor [Solanum tuberosum] gi|2997593|gb|AAC08526 [At5g17630.1]
A_84_P178774	TREATMENT	90 min col-0 treatment	45 min col-0 control	4.195	1.0598	15	-3.96	0.00126	0.0338397		At2g41240.1	At2g41240.1	basic helix-loop-helix (bHLH) family protein contains Pfam profile: PF00010 helix-loop-helix DNA-binding domain [At2g41240.1]
A_84_P194484	TREATMENT	90 min col-0 treatment	45 min col-0 control	-0.3607	0.09116	15	3.96	0.00127	0.0339887		At4g16410.1	At4g16410.1	expressed protein contains Pfam PF05421: Protein of unknown function (DUF751) [At4g16410.1]
A_84_P18174	TREATMENT	90 min col-0 treatment	45 min col-0 control	-0.1758	0.04444	15	3.96	0.00127	0.0339887		At1g63440.1	At1g63440.1	copper-exporting ATPase, putative / responsive-to-antagonist 1, putative / copper-transporting ATPase, putative similar to ATP dependent copper transporter SP|Q9S7J8 [Arabidopsis thaliana] [At1g63440.1]
A_84_P557876	TREATMENT	90 min col-0 treatment	45 min col-0 control	0.3529	0.08923	15	-3.96	0.00127	0.0339887		At1g77660.1	At1g77660.1	MORN (Membrane Occupation and Recognition Nexus) repeat-containing protein /phosphatidylinositol-4-phosphate 5-kinase-related low similarity to phosphatidylinositol-4-phosphate 5-kinase AtPIP5K1 [Arabidopsis thaliana] GI:3702691; contains Pfam profile...
A_84_P13270	TREATMENT	90 min col-0 treatment	45 min col-0 control	0.4678	0.1183	15	-3.95	0.00127	0.0339887		At1g70220.1	At1g70220.1	hypothetical protein [At1g70220.1]
A_84_P292024	TREATMENT	90 min col-0 treatment	45 min col-0 control	-0.8126	0.2056	15	3.95	0.00128	0.0341069		At4g03292.1	At4g03292.1	expressed protein ; expression supported by MPSS [At4g03292.1]
A_84_P702597	TREATMENT	90 min col-0 treatment	45 min col-0 control	-0.5976	0.1512	15	3.95	0.00128	0.0341069		CHR1:005168626-005168567	CHR1:005168626-005168567	Unknown
A_84_P10311	TREATMENT	90 min col-0 treatment	45 min col-0 control	-0.4525	0.1145	15	3.95	0.00128	0.0341069		At5g61010.1	At5g61010.1	exocyst subunit EXO70 family protein leucine zipper-containing protein, tomato, PIR:S21495; contains Pfam domain PF03081: Exo70 exocyst complex subunit; similar to rexo70 (GI:2827160) {Rattus norvegicus} [At5g61010.1]
A_84_P219918	TREATMENT	90 min col-0 treatment	45 min col-0 control	0.2305	0.0583	15	-3.95	0.00128	0.0341069		At1g01830.1	At1g01830.1	armadillo/beta-catenin repeat family protein armadillo/beta-catenin-like repeats, Pfam:PF00514 [At1g01830.1]
A_84_P81259	TREATMENT	90 min col-0 treatment	45 min col-0 control	0.3016	0.07634	15	-3.95	0.00128	0.0341069		At4g21510.1	At4g21510.1	F-box family protein contains Pfam PF00646: F-box domain; similar to SKP1 interacting partner 2 (SKIP2) TIGR_Ath1:At5g67250 [At4g21510.1]
A_84_P107852	TREATMENT	90 min col-0 treatment	45 min col-0 control	-0.4872	0.1234	15	3.95	0.00129	0.0342836		At1g12080.1	At1g12080.1	expressed protein [At1g12080.1]
A_84_P19577	TREATMENT	90 min col-0 treatment	45 min col-0 control	-0.2227	0.05643	15	3.95	0.00129	0.0342836		At4g13930.1	At4g13930.1	glycine hydroxymethyltransferase, putative / serine hydroxymethyltransferase, putative / serine/threonine aldolase, putative similar to serine hydroxymethyltransferase [Chlamydomonas reinhardtii] GI:17066746; contains Pfam profile PF00464: serine...
A_84_P166053	TREATMENT	90 min col-0 treatment	45 min col-0 control	-0.1975	0.05002	15	3.95	0.00129	0.0342836		At2g32380.1	At2g32380.1	expressed protein [At2g32380.1]
A_84_P536189	TREATMENT	90 min col-0 treatment	45 min col-0 control	-0.2998	0.076	15	3.94	0.0013	0.0344295		At5g05240.1	At5g05240.1	expressed protein similar to unknown protein (gb AAD32815.2) [At5g05240.1]
A_84_P229799	TREATMENT	90 min col-0 treatment	45 min col-0 control	-0.2392	0.06063	15	3.95	0.0013	0.0344295		At5g11970.1	At5g11970.1	expressed protein [At5g11970.1]
A_84_P151718	TREATMENT	90 min col-0 treatment	45 min col-0 control	0.1681	0.04261	15	-3.95	0.0013	0.0344295		At2g28330.1	At2g28330.1	expressed protein [At2g28330.1]
A_84_P10561	TREATMENT	90 min col-0 treatment	45 min col-0 control	0.2847	0.07216	15	-3.95	0.0013	0.0344295		At1g51780.1	At1g51780.1	IAA-amino acid hydrolase 5 / auxin conjugate hydrolase (ILL5) identical to auxin conjugate hydrolase ILL5 [Arabidopsis thaliana] gi|5725649|gb|AAD48152; contains nonconsensus AT acceptor splice site at exon3 [At1g51780.1]
A_84_P18998	TREATMENT	90 min col-0 treatment	45 min col-0 control	-1.053	0.2671	15	3.94	0.00131	0.0345147		At1g72900.1	At1g72900.1	disease resistance protein (TIR-NBS class), putative domain signature TIR-NBS exists, suggestive of a disease resistance protein. [At1g72900.1]
A_84_P15442	TREATMENT	90 min col-0 treatment	45 min col-0 control	-0.4163	0.1057	15	3.94	0.00131	0.0345147		At2g16280.1	At2g16280.1	very-long-chain fatty acid condensing enzyme, putative similar to fatty acid condensing enzyme CUT1 GI:5001734 from [Arabidopsis thaliana] [At2g16280.1]
A_84_P514334	TREATMENT	90 min col-0 treatment	45 min col-0 control	0.2107	0.05344	15	-3.94	0.00131	0.0345147		At1g43245.1	At1g43245.1	expressed protein [At1g43245.1]
A_84_P21454	TREATMENT	90 min col-0 treatment	45 min col-0 control	0.3402	0.08635	15	-3.94	0.00131	0.0345147		At4g35760.1	At4g35760.1	expressed protein [At4g35760.1]
A_84_P713790	TREATMENT	90 min col-0 treatment	45 min col-0 control	0.6917	0.1757	15	-3.94	0.00131	0.0345147		CHR1:026166376-026166435	CHR1:026166376-026166435	Unknown
A_84_P12457	TREATMENT	90 min col-0 treatment	45 min col-0 control	1.0048	0.2551	15	-3.94	0.00131	0.0345147		At1g13420.1	At1g13420.1	sulfotransferase family protein similar to steroid sulfotransferase 1 GI:3420004 from (Brassica napus); contains Pfam profile PF00685: Sulfotransferase domain [At1g13420.1]
A_84_P21890	TREATMENT	90 min col-0 treatment	45 min col-0 control	-0.2906	0.0738	15	3.94	0.00132	0.0347183		At1g70740.1	At1g70740.1	protein kinase family protein contains protein kinase domain, Pfam:PF00069 [At1g70740.1]
A_84_P511151	TREATMENT	90 min col-0 treatment	45 min col-0 control	0.3204	0.08136	15	-3.94	0.00132	0.0347183		At3g46610.1	At3g46610.1	pentatricopeptide (PPR) repeat-containing protein contains Pfam profile PF01535: PPR repeat [At3g46610.1]
A_84_P588688	TREATMENT	90 min col-0 treatment	45 min col-0 control	-0.4502	0.1145	15	3.93	0.00133	0.0348612		At5g46500.1	At5g46500.1	expressed protein [At5g46500.1]
A_84_P23568	TREATMENT	90 min col-0 treatment	45 min col-0 control	-0.2574	0.06548	15	3.93	0.00133	0.0348612		At5g65270.1	At5g65270.1	Ras-related GTP-binding family protein similar to GTP-binding protein RAB11A GI:1370142 from [Lotus japonicus]; contains Pfam profile: PF00071 Ras family [At5g65270.1]
A_84_P728151	TREATMENT	90 min col-0 treatment	45 min col-0 control	0.297	0.07551	15	-3.93	0.00133	0.0348612		CHR1:002226273-002226214	CHR1:002226273-002226214	Unknown
A_84_P10542	TREATMENT	90 min col-0 treatment	45 min col-0 control	0.3527	0.08969	15	-3.93	0.00133	0.0348612		At1g74390.1	At1g74390.1	exonuclease family protein contains exonuclease domain, Pfam:PF00929 [At1g74390.1]
A_84_P13675	TREATMENT	90 min col-0 treatment	45 min col-0 control	-0.3176	0.08086	15	3.93	0.00134	0.0350031		At1g35720.1	At1g35720.1	annexin 1 (ANN1) identical to annexin (AnnAt1) [Arabidopsis thaliana] GI:4959106 [At1g35720.1]
A_84_P21905	TREATMENT	90 min col-0 treatment	45 min col-0 control	-0.2325	0.05916	15	3.93	0.00134	0.0350031		At1g31420.1	At1g31420.1	leucine-rich repeat transmembrane protein kinase, putative contains Pfam profile: PF00069: Eukaryotic protein kinase domain [At1g31420.1]
A_84_P562681	TREATMENT	90 min col-0 treatment	45 min col-0 control	0.3681	0.0937	15	-3.93	0.00134	0.0350031		At4g23420.2	At4g23420.2	short-chain dehydrogenase/reductase (SDR) family protein similar to WW-domain oxidoreductase [Mus musculus] GI:6934274, WW domain-containing oxidoreductase isoform FORII [Homo sapiens] GI:15667686; contains Pfam PF00106: oxidoreductase, short chain...
A_84_P13542	TREATMENT	90 min col-0 treatment	45 min col-0 control	0.4688	0.1193	15	-3.93	0.00134	0.0350031		At2g41070.1	At2g41070.1	basic leucine zipper transcription factor (BZIP12) nearly identical to basic leucine zipper transcription factor [Arabidopsis thaliana] GI:21694632; contains a bZIP transcription factor basic domain signature (PDOC00036) [At2g41070.1]
A_84_P556661	TREATMENT	90 min col-0 treatment	45 min col-0 control	-1.3381	0.3408	15	3.93	0.00135	0.0351348		At5g43230.1	At5g43230.1	hypothetical protein [At5g43230.1]
A_84_P584025	TREATMENT	90 min col-0 treatment	45 min col-0 control	-1.2883	0.3283	15	3.92	0.00135	0.0351348		At4g08555.1	At4g08555.1	expressed protein [At4g08555.1]
A_84_P24100	TREATMENT	90 min col-0 treatment	45 min col-0 control	-0.6404	0.1633	15	3.92	0.00136	0.0351348		At3g47780.1	At3g47780.1	ABC transporter family protein transport protein ABC-C, Homo sapiens, PIR2:S71363 [At3g47780.1]
A_84_P23912	TREATMENT	90 min col-0 treatment	45 min col-0 control	-0.5858	0.1493	15	3.92	0.00135	0.0351348		At2g38940.1	At2g38940.1	phosphate transporter (PT2) identical to phosphate transporter (AtPT2) [Arabidopsis thaliana] GI:1502430 [At2g38940.1]
A_84_P523919	TREATMENT	90 min col-0 treatment	45 min col-0 control	-0.4643	0.1183	15	3.92	0.00136	0.0351348		At5g56230.1	At5g56230.1	prenylated rab acceptor (PRA1) family protein contains Pfam profile PF03208: Prenylated rab acceptor (PRA1) [At5g56230.1]
A_84_P14863	TREATMENT	90 min col-0 treatment	45 min col-0 control	-0.2938	0.07493	15	3.92	0.00136	0.0351348		At4g36990.1	At4g36990.1	heat shock factor protein 4 (HSF4) / heat shock transcription factor 4 (HSTF4) identical to heat shock transcription factor 4 (HSF4) SP:Q96320 from [Arabidopsis thaliana] [At4g36990.1]
A_84_P23260	TREATMENT	90 min col-0 treatment	45 min col-0 control	-0.2867	0.07312	15	3.92	0.00136	0.0351348		At4g11820.1	At4g11820.1	hydroxymethylglutaryl-CoA synthase / HMG-CoA synthase / 3-hydroxy-3-methylglutaryl coenzyme A synthase identical to Hydroxymethylglutaryl-CoA synthase (EC 4.1.3.5) (HMG-CoA synthase) (3-hydroxy-3-methylglutaryl coenzyme A synthase) (Swiss-Prot:P54873)...
A_84_P169943	TREATMENT	90 min col-0 treatment	45 min col-0 control	0.1897	0.04834	15	-3.92	0.00136	0.0351348		At3g18390.1	At3g18390.1	expressed protein contains Pfam domain, PF04581: Protein of unknown function (DUF578) [At3g18390.1]
A_84_P13114	TREATMENT	90 min col-0 treatment	45 min col-0 control	0.2319	0.05912	15	-3.92	0.00136	0.0351348		At5g52440.1	At5g52440.1	HCF106 protein identical to HCF106 [Arabidopsis thaliana] GI:4894914; contains Pfam profile PF02416: mttA/Hcf106 family [At5g52440.1]
A_84_P75224	TREATMENT	90 min col-0 treatment	45 min col-0 control	0.2506	0.06387	15	-3.92	0.00136	0.0351348		TC277102	TC277102	Unknown
A_84_P511230	TREATMENT	90 min col-0 treatment	45 min col-0 control	0.3325	0.08478	15	-3.92	0.00136	0.0351348		At4g10080.1	At4g10080.1	expressed protein [At4g10080.1]
A_84_P532625	TREATMENT	90 min col-0 treatment	45 min col-0 control	0.396	0.101	15	-3.92	0.00136	0.0351348		At4g39810.1	At4g39810.1	exonuclease family protein contains exonuclease domain, Pfam:PF00929 [At4g39810.1]
A_84_P238183	TREATMENT	90 min col-0 treatment	45 min col-0 control	1.1343	0.2892	15	-3.92	0.00136	0.0351348		At3g23880.1	At3g23880.1	F-box family protein contains F-box domain Pfam:PF00646 [At3g23880.1]
A_84_P21315	TREATMENT	90 min col-0 treatment	45 min col-0 control	-0.4435	0.1132	15	3.92	0.00137	0.0353334		At3g60160.1	At3g60160.1	ABC transporter family protein similar to ATP-binding cassette transporter MRP8 GI:18031899 from [Arabidopsis thaliana] [At3g60160.1]
A_84_P603561	TREATMENT	90 min col-0 treatment	45 min col-0 control	0.3302	0.08432	15	-3.92	0.00137	0.0353334		At3g54740.1	At3g54740.1	expressed protein contains Pfam profile PF04576: Protein of unknown function, DUF593 [At3g54740.1]
A_84_P10768	TREATMENT	90 min col-0 treatment	45 min col-0 control	-0.4759	0.1216	15	3.92	0.00138	0.0354416		At3g04220.1	At3g04220.1	disease resistance protein (TIR-NBS-LRR class), putative domain signature TIR-NBS-LRR exists, suggestive of a disease resistance protein. [At3g04220.1]
A_84_P156545	TREATMENT	90 min col-0 treatment	45 min col-0 control	-0.3002	0.07669	15	3.91	0.00138	0.0354416		At5g59970.1	At5g59970.1	histone H4 identical to histone H4 from Lycopersicon esculentum GI:297150, Lolium temulentum SP|P02308, Acropora formosa GI:455652, Citrus jambhiri GI:16797797 [At5g59970.1]
A_84_P19152	TREATMENT	90 min col-0 treatment	45 min col-0 control	-0.2517	0.0643	15	3.91	0.00138	0.0354416		At2g22610.1	At2g22610.1	kinesin motor protein-related [At2g22610.1]
A_84_P600829	TREATMENT	90 min col-0 treatment	45 min col-0 control	0.471	0.1204	15	-3.91	0.00138	0.0354416		At3g22410.1	At3g22410.1	expressed protein [At3g22410.1]
A_84_P740197	TREATMENT	90 min col-0 treatment	45 min col-0 control	0.8744	0.2234	15	-3.91	0.00138	0.0354416		CHR1:026165886-026165945	CHR1:026165886-026165945	Unknown
[truncated: 327 more rows]

## Sheet: significant genes Time 180
GENE	Effect	_TREATMENT	TREATMENT	Log2(Fold Change treatment vs control)	StdErr	DF	tValue	Probt	q-value		GeneName	SystematicName	Description
[truncated: 3,265 more rows]

[truncated: 4 more sheets: sign. genes cax1-1 vs  col-0, function genes Time 45, genes Time 45 at Time 45-180, transporter genes Time 45-180]
